# Supplementary material for: Unravelling druggable signalling networks that control F508del-CFTR proteostasis
Source: eLife journal article supplement (doi:10.7554/elife.10365), 2015-12-22
Supplement: supp [file elife-10365-supp-v1.zip]

Archive with 15 entries (15 files):
- elife_poa_e10365_Supplementary_File_6.xlsx
- elife_poa_e10365_Supplementary_File_1.xlsx
- elife_poa_e10365_Figure_2_figure_supplement_2.pdf
- elife_poa_e10365_Figure_2_figure_supplement_1.pdf
- elife_poa_e10365_Figure_6_figure_supplement_1.pdf
- elife_poa_e10365_Supplementary_File_2.xlsx
- elife_poa_e10365_Figure_1_figure_supplement_1.pdf
- elife_poa_e10365_Supplementary_File_5.xlsx
- elife_poa_e10365_Figure_4_figure_supplement_1.pdf
- elife_poa_e10365_Figure_3_figure_supplement_1.pdf
- elife_poa_e10365_Supplementary_File_3.xlsx
- elife_poa_e10365_Figure_2_figure_supplement_3.pdf
- elife_poa_e10365_Figure_1_figure_supplement_2.pdf
- elife_poa_e10365_Supplementary_File_4.xlsx
- elife_poa_e10365_Figure_6_figure_supplement_2.pdf
