# Supplementary material for: Unravelling druggable signalling networks that control F508del-CFTR proteostasis
Source: eLife journal article supplement (doi:10.7554/elife.10365), 2015-12-22
Supplement: supp [file elife-10365-supp-v1.zip › elife_poa_e10365_Supplementary_File_1.xlsx]

## Sheet: 4-AN PARP1 inhibitor
ProbeID	EntrezGeneID	GeneSymbol	pvalue	FDR	Fold Change (log2 signed ratio)
A_23_P100001	400451	FAM174B	0.079175	0.356722	-0.391921
A_23_P100011	10239	AP3S2	0.968082	0.986035	0.00698886
A_23_P100022	9899	SV2B	0.0511533	0.316047	-0.28278
A_23_P100056	348093	RBPMS2	0.342215	0.618696	-0.204113
A_23_P100074	57099	AVEN	0.105928	0.393534	-0.23242
A_23_P100092	146050	ZSCAN29	0.224394	0.519475	-0.14144
A_23_P100103	23339	VPS39	0.384448	0.649352	-0.143783
A_23_P100111	11261	CHP	0.0298221	0.275316	-0.303566
A_23_P100127	57082	CASC5	0.0139445	0.230874	-0.874991
A_23_P100133	23300	ATMIN	0.879828	0.946201	-0.0279492
A_23_P100141	64718	UNKL	0.0375602	0.29159	-0.574274
A_23_P100156	55654	TMEM127	0.373271	0.641722	0.130575
A_23_P100177	4324	MMP15	0.207961	0.505	0.405531
A_23_P100189	5619	PRM1	0.556705	0.76892	-0.0671992
A_23_P100196	9100	USP10	0.190842	0.488122	0.197767
A_23_P100203	3281	HSBP1	0.255446	0.546308	0.161641
A_23_P100220	80004	ESRP2	0.122608	0.414012	-0.409973
A_23_P100240	1014	CDH16	0.871301	0.942618	-0.020547
A_23_P10025	4753	NELL2	0.435521	0.685137	-0.0893983
A_23_P100263	80790	CMIP	0.308356	0.592297	-0.18866
A_23_P100278	2903	GRIN2A	0.551985	0.766321	0.0651234
A_23_P100292	90850	ZNF598	0.299647	0.585043	-0.140497
A_23_P100315	26063	DECR2	0.698334	0.853113	-0.0788355
A_23_P100326	8131	NPRL3	0.104354	0.391551	-0.24825
A_23_P100341	23594	ORC6	0.175982	0.473659	0.192303
A_23_P100344	23594	ORC6	0.157201	0.454337	0.388149
A_23_P100355	5531	PPP4C	0.121361	0.412383	0.154963
A_23_P100386	146433	IL34	0.963992	0.984577	0.00441848
A_23_P100392	6923	TCEB2	0.359629	0.632358	-0.162213
A_23_P100408	4917	NTN3	0.0638629	0.334753	0.210056
A_23_P100413	118460	EXOSC6	0.380657	0.647028	-0.130563
A_23_P100420	23174	ZCCHC14	0.00859013	0.205925	0.350865
A_23_P100441	80011	FAM192A	0.190535	0.48788	-0.150255
A_23_P100455	64779	MTHFSD	0.156927	0.454165	-0.312641
A_23_P100469	54957	TXNL4B	0.602309	0.796009	0.0473353
A_23_P100478	84148	KAT8	0.274443	0.563509	0.104054
A_23_P100486	79001	VKORC1	0.355844	0.628971	-0.0919777
A_23_P100499	79641	ROGDI	0.311754	0.59452	0.0734268
A_23_P100501	3163	HMOX2	0.680789	0.842536	0.0322179
A_23_P100517	124491	TMEM170A	0.881742	0.947052	-0.0188646
A_23_P100522	NA		0.0439894	0.304158	-0.812427
A_23_P100539	368	ABCC6	0.0924304	0.375798	-0.231896
A_23_P100556	23265	EXOC7	0.804974	0.909405	-0.0214052
A_23_P100576	5691	PSMB3	0.729726	0.870187	-0.0257734
A_23_P100583	4025	LPO	0.207791	0.504926	0.231127
A_23_P100595	NA		0.0965692	0.381476	-0.538268
A_23_P10060	NA		0.493027	0.727938	-0.0794819
A_23_P100602	6904	TBCD	0.213023	0.509308	-0.113237
A_23_P10062	25834	MGAT4C	0.056077	0.322149	-0.610979
A_23_P100632	51155	HN1	0.0936522	0.377444	-0.343853
A_23_P100642	5409	PNMT	0.657867	0.828373	-0.0910254
A_23_P100654	57659	ZBTB4	0.841399	0.928408	-0.0200858
A_23_P100660	5176	SERPINF1	0.0243497	0.264319	-0.396957
A_23_P100676	23293	SMG6	0.258873	0.549341	-0.338972
A_23_P100693	9931	HELZ	0.868039	0.940777	0.015764
A_23_P100704	5598	MAPK7	0.606347	0.79854	0.0991913
A_23_P100711	5376	PMP22	0.259048	0.54948	-0.0936626
A_23_P100730	8631	SKAP1	0.0619346	0.331894	-0.368129
A_23_P100754	64750	SMURF2	0.632324	0.813101	0.10442
A_23_P100764	51629	SLC25A39	0.851502	0.932966	-0.0193292
A_23_P10077	57104	PNPLA2	0.552201	0.76646	-0.131694
A_23_P100779	7343	UBTF	0.207923	0.504994	0.100777
A_23_P100788	6777	STAT5B	0.499951	0.73262	0.067328
A_23_P100795	6774	STAT3	0.0327203	0.281434	0.246882
A_23_P100802	28958	CCDC56	0.142211	0.439684	-0.256169
A_23_P10081	200894	ARL13B	0.967068	0.985717	0.00615793
A_23_P100868	80179	MYO19	0.0975939	0.382592	-0.24506
A_23_P100872	3213	HOXB3	0.898062	0.95527	0.011003
A_23_P100883	23512	SUZ12	0.0687263	0.341425	-0.222409
A_23_P10091	NA		0.646338	0.821613	-0.100512
A_23_P100912	28964	GIT1	0.721607	0.865746	0.0607961
A_23_P100931	23746	AIPL1	0.194347	0.491194	-0.166312
A_23_P100935	23746	AIPL1	0.0892852	0.37113	0.185689
A_23_P100959	124961	ZFP3	0.15598	0.453118	0.161395
A_23_P100963	201305	SPNS3	0.097234	0.38237	-0.441248
A_23_P100990	8687	KRT38	0.484547	0.721943	-0.111483
A_23_P100991	8687	KRT38	0.285008	0.572922	0.28832
A_23_P101007	147111	NOTUM	0.0296663	0.274928	-0.415824
A_23_P101013	11322	TMC6	0.310777	0.593914	-0.165255
A_23_P101025	654346	LGALS9C	0.110692	0.399687	-0.350604
A_23_P101038	83900	KRTAP9-3	0.323155	0.603761	0.137393
A_23_P101048	83897	KRTAP3-2	0.0934972	0.377276	0.412782
A_23_P101054	3885	KRT34	0.0315213	0.279402	-0.418244
A_23_P101073	8387	OR1E1	0.884095	0.948625	-0.03706
A_23_P101084	84690	SPATA22	0.968686	0.98617	0.00433613
A_23_P101093	51226	COPZ2	0.22814	0.522657	-0.176775
A_23_P101111	9150	CTDP1	0.482284	0.720101	-0.126933
A_23_P101121	NA		0.215506	0.512068	-0.161219
A_23_P101131	2922	GRP	0.365904	0.636759	-0.0796118
A_23_P101141	54941	RNF125	0.150408	0.447789	-0.203433
A_23_P101185	4677	NARS	0.112455	0.4015	0.2467
A_23_P101193	4645	MYO5B	0.0176079	0.245545	0.188524
A_23_P101208	1528	CYB5A	0.177951	0.475264	0.170351
A_23_P10121	6422	SFRP1	0.0905954	0.37297	0.373116
A_23_P101237	83608	C18orf21	0.826943	0.921284	-0.0265173
A_23_P101240	147645	VSIG10L	0.0548522	0.32102	-0.431254
A_23_P101246	147645	VSIG10L	0.756757	0.884149	-0.0554609
A_23_P101253	80110	ZNF614	0.811228	0.912457	0.0160644
A_23_P101258	80110	ZNF614	0.188347	0.485875	0.142733
A_23_P10127	6422	SFRP1	0.000819654	0.0928338	0.369392
A_23_P101272	55663	ZNF446	0.261129	0.55153	-0.22125
A_23_P101281	84914	ZNF587	0.0291524	0.274381	-0.809525
A_23_P101297	24139	EML2	0.0895793	0.371736	0.203343
A_23_P101303	284352	LRRC68	0.550794	0.76582	-0.216087
A_23_P101308	284352	LRRC68	0.617133	0.804009	-0.136544
A_23_P101319	26974	ZNF285	0.00997655	0.215827	0.273637
A_23_P101321	9138	ARHGEF1	0.760857	0.886276	-0.0465391
A_23_P101332	65095	KRI1	0.0542719	0.319855	-0.320489
A_23_P101342	84971	ATG4D	0.926908	0.968704	0.0132583
A_23_P10135	28511	NKIRAS2	0.99091	0.996216	0.00152245
A_23_P101351	79088	ZNF426	0.00925575	0.210943	-0.372338
A_23_P101374	29785	CYP2S1	0.446239	0.693102	-0.200259
A_23_P101380	374907	B3GNT8	0.243395	0.536106	-0.331425
A_23_P101392	79041	TMEM38A	0.538208	0.757831	-0.0710252
A_23_P1014	84791	C1orf97	0.072085	0.346181	-0.364851
A_23_P101407	718	C3	0.00258427	0.137747	0.496356
A_23_P101427	115704	EVI5L	0.950695	0.979102	-0.00903457
A_23_P101434	91662	NLRP12	0.0188504	0.250038	-0.519571
A_23_P101461	81576	CCDC130	0.679708	0.841909	-0.055555
A_23_P101476	79973	ZNF442	0.725692	0.868129	-0.0328009
A_23_P101480	22983	MAST1	0.44772	0.694008	-0.194425
A_23_P101505	11012	KLK11	0.0292218	0.274381	-0.651914
A_23_P101516	3748	KCNC3	0.8845	0.948736	-0.0172685
A_23_P101521	126123	IZUMO2	0.221015	0.516536	0.135054
A_23_P101532	6205	RPS11	0.633716	0.813805	-0.2354
A_23_P101551	587	BCAT2	0.256124	0.546885	-0.173735
A_23_P10156	79643	CHMP6	0.233487	0.527344	-0.298517
A_23_P101564	26291	FGF21	0.199944	0.496716	-0.146166
A_23_P101573	171169	SPACA4	0.440643	0.689252	-0.126174
A_23_P101615	147929	ZNF565	0.75825	0.885126	-0.016589
A_23_P101623	63934	ZNF667	0.0981593	0.383221	-0.355977
A_23_P101636	3812	KIR3DL2	0.0835472	0.362518	-0.272691
A_23_P101642	5794	PTPRH	0.00934285	0.211634	-0.639254
A_23_P101655	81	ACTN4	0.535962	0.756544	-0.14026
A_23_P101671	85300	ATCAY	0.0937101	0.377566	-0.171034
A_23_P101683	1178	CLC	0.779948	0.896694	0.0292754
A_23_P101699	84717	HDGFRP2	0.34783	0.6236	-0.0754853
A_23_P101707	10226	PLIN3	0.326433	0.605951	0.134407
A_23_P10172	29122	PRSS50	0.316566	0.598588	0.151098
A_23_P101737	84444	DOT1L	0.126608	0.420966	-0.322391
A_23_P101742	116541	MRPL54	0.183973	0.48139	-0.205449
A_23_P101759	2527	FUT5	0.679548	0.841812	-0.0496666
A_23_P101761	84634	KISS1R	0.372236	0.641115	-0.189735
A_23_P101774	6528	SLC5A5	0.936657	0.972891	-0.00515458
A_23_P101783	3594	IL12RB1	0.888943	0.950715	-0.0255873
A_23_P101796	85360	SYDE1	0.0269905	0.270366	-0.302429
A_23_P101806	3249	HPN	0.299239	0.5847	-0.219426
A_23_P101811	7561	ZNF14	0.813507	0.913727	-0.0212842
A_23_P10182	8309	ACOX2	0.0208492	0.254516	-0.75131
A_23_P101829	9170	LPAR2	0.643297	0.819604	0.0863899
A_23_P101871	115290	FBXO17	0.291752	0.577876	0.0734296
A_23_P101893	84467	FBN3	0.257482	0.548061	0.117414
A_23_P101905	10297	APC2	0.0899084	0.371985	-0.429658
A_23_P101908	10297	APC2	0.500456	0.732889	-0.126453
A_23_P10194	26470	SEZ6L2	0.315175	0.597551	-0.198663
A_23_P101943	26225	ARL5A	0.411629	0.668097	0.105621
A_23_P101950	4190	MDH1	0.00890671	0.207878	0.260233
A_23_P101960	678	ZFP36L2	0.014879	0.233531	-0.985299
A_23_P101972	92291	CAPN13	0.401733	0.660754	0.113089
A_23_P101992	8685	MARCO	0.947816	0.977568	0.00678827
A_23_P102000	7852	CXCR4	0.0149317	0.233531	-0.484364
A_23_P102017	57471	ERMN	0.413171	0.668945	-0.224368
A_23_P102037	80219	COQ10B	0.653715	0.825958	0.0930473
A_23_P102058	4148	MATN3	0.151993	0.448899	-0.288002
A_23_P10206	3037	HAS2	0.0418636	0.299391	-0.216889
A_23_P102060	6744	SSFA2	0.99443	0.998045	0.00124546
A_23_P102071	NA		0.109266	0.397791	0.117093
A_23_P102083	66037	BOLL	0.220051	0.515695	-0.137509
A_23_P102109	7277	TUBA4A	0.412213	0.668327	-0.145856
A_23_P10211	114134	SLC2A13	0.680547	0.842363	0.0354395
A_23_P102113	80326	WNT10A	0.36523	0.63637	-0.282754
A_23_P102117	80326	WNT10A	0.875839	0.944984	0.0430921
A_23_P102122	10109	ARPC2	0.0467343	0.309049	-0.153567
A_23_P102160	151393	FAM82A1	0.00121844	0.108975	0.238623
A_23_P102172	130749	CPO	0.856635	0.935637	0.0320553
A_23_P102183	NA		0.597398	0.793541	0.080462
A_23_P102192	9448	MAP4K4	0.234175	0.52781	0.350664
A_23_P102202	2956	MSH6	0.255204	0.54614	0.120889
A_23_P102235	6637	SNRPG	0.222521	0.518143	-0.187093
A_23_P102242	64844	2007-03-01	0.498874	0.732165	-0.149444
A_23_P102258	116540	MRPL53	0.246317	0.538699	-0.203354
A_23_P102262	9801	MRPL19	0.334121	0.611669	0.177095
A_23_P102278	57628	DPP10	0.168691	0.466855	-0.190079
A_23_P102286	3973	LHCGR	0.486649	0.723287	-0.177733
A_23_P10232	55024	BANK1	0.0235606	0.262545	0.375832
A_23_P102320	129401	NUP35	0.831764	0.923881	-0.0157921
A_23_P102331	6332	SCN7A	0.587833	0.788067	0.0732467
A_23_P102351	9486	CHST10	0.116735	0.406483	0.341311
A_23_P102364	25791	NGEF	0.103729	0.390333	-0.226825
A_23_P102391	30061	SLC40A1	0.0169713	0.242785	0.267019
A_23_P102404	10574	CCT7	0.156222	0.453352	0.262945
A_23_P102412	65977	PLEKHA3	0.0108503	0.219403	0.117837
A_23_P102420	10575	CCT4	0.605795	0.798149	0.111721
A_23_P102439	431705	ASTL	0.249105	0.540644	0.12971
A_23_P102454	51141	INSIG2	0.382635	0.648386	0.133419
A_23_P102462	129804	FBLN7	0.354771	0.628358	-0.0892441
A_23_P102471	4436	MSH2	0.0761364	0.352733	0.324481
A_23_P102481	1493	CTLA4	0.482292	0.720101	-0.136423
A_23_P102494	54978	C2orf18	0.424926	0.67796	-0.134993
A_23_P102508	8884	SLC5A6	0.272828	0.562248	0.199545
A_23_P102517	5147	PDE6D	0.118367	0.408814	0.160494
A_23_P102523	6711	SPTBN1	0.591757	0.790268	0.150731
A_23_P102542	54812	AFTPH	0.769764	0.891134	-0.0490771
A_23_P102551	7851	MALL	0.458717	0.702499	0.238292
A_23_P102571	56731	SLC2A4RG	0.072969	0.347754	-0.507159
A_23_P102575	56731	SLC2A4RG	0.218962	0.514677	-0.21289
A_23_P102582	55969	C20orf24	0.309344	0.592983	0.116418
A_23_P102607	84181	CHD6	0.235512	0.529153	0.148617
A_23_P102611	8839	WISP2	0.0595965	0.327963	-0.33999
A_23_P102622	8785	MATN4	0.109033	0.397437	-0.563097
A_23_P102634	140870	WFDC6	0.493529	0.728155	-0.115391
A_23_P102681	79160	MGC4294	0.522316	0.748017	0.13855
A_23_P102694	140881	DEFB129	0.0951006	0.379292	-0.519145
A_23_P102706	9751	SNPH	0.285486	0.573153	-0.296862
A_23_P102731	54498	SMOX	0.421306	0.675079	-0.197981
A_23_P102743	51605	TRMT6	0.61011	0.80031	-0.0594911
A_23_P102759	22903	BTBD3	0.523791	0.749068	0.102712
A_23_P102769	92667	C20orf72	0.820574	0.917493	-0.026497
A_23_P102770	51126	NAA20	0.360722	0.633173	0.10584
A_23_P102816	NA		0.248052	0.5402	-0.165728
A_23_P102832	11190	CEP250	0.109468	0.398012	-0.375917
A_23_P102842	9054	NFS1	0.165976	0.463841	0.0847249
A_23_P102864	5651	TMPRSS15	0.048914	0.312087	-0.708371
A_23_P102876	10694	CCT8	0.18129	0.478842	0.265705
A_23_P102884	8867	SYNJ1	0.0605547	0.329006	-0.236204
A_23_P102890	64968	MRPS6	0.481969	0.719844	-0.101082
A_23_P1029	4237	MFAP2	0.902367	0.957059	0.0104052
A_23_P10291	1510	CTSE	0.0691759	0.34225	-0.270163
A_23_P102917	10317	B3GALT5	0.969677	0.986741	-0.00864965
A_23_P102919	10317	B3GALT5	0.752568	0.882262	-0.0540994
A_23_P102925	5822	PWP2	0.414586	0.669688	-0.096409
A_23_P102937	6612	SUMO3	0.0958067	0.38037	0.164033
A_23_P102950	89765	RSPH1	0.946972	0.977243	0.0085842
A_23_P102965	23786	BCL2L13	0.102555	0.389036	0.255554
A_23_P102973	8220	DGCR14	0.327866	0.606828	-0.21256
A_23_P102988	10587	TXNRD2	0.847946	0.931435	0.0247114
A_23_P102994	5297	PI4KA	0.284087	0.572144	0.112895
A_23_P103011	9609	RAB36	0.395978	0.656601	-0.241043
A_23_P103034	1413	CRYBA4	0.563704	0.772819	-0.0551295
A_23_P103041	10634	GAS2L1	0.332309	0.610033	-0.127848
A_23_P10305	56474	CTPS2	0.20301	0.499898	0.263376
A_23_P103062	91445	RNF185	0.493526	0.728155	0.0433564
A_23_P103070	7533	YWHAH	0.13723	0.434489	0.360346
A_23_P103084	10043	TOM1	0.325475	0.605165	-0.0986589
A_23_P103099	23543	RBFOX2	0.466392	0.708697	-0.0794987
A_23_P103104	4242	MFNG	0.0385367	0.292601	-0.377497
A_23_P103110	23764	MAFF	0.317578	0.599351	0.159924
A_23_P103120	9567	GTPBP1	0.0725586	0.346802	-0.407109
A_23_P103131	54471	SMCR7L	0.0437298	0.303517	-0.253424
A_23_P103149	50	ACO2	0.900748	0.956297	0.0146452
A_23_P103172	127253	TYW3	0.0479122	0.311201	-0.228429
A_23_P103180	127253	TYW3	0.011088	0.219417	-0.787222
A_23_P103201	55629	PNRC2	0.117746	0.408049	0.315225
A_23_P103226	2166	FAAH	0.142573	0.440074	-0.330552
A_23_P103232	54935	DUSP23	0.17596	0.473631	-0.234401
A_23_P103248	93183	PIGM	0.206877	0.50386	0.152445
A_23_P103256	10878	CFHR3	0.191345	0.48852	-0.343312
A_23_P103269	NA		0.0852346	0.365967	-0.342553
A_23_P103276	112970	KTI12	0.0295996	0.274877	-0.226675
A_23_P103282	9528	TMEM59	0.0561179	0.322149	0.258991
A_23_P103310	6278	S100A7	0.00302327	0.146172	-0.702211
A_23_P103315	353131	LCE1A	0.0988046	0.384126	-0.563912
A_23_P103328	5733	PTGER3	0.303038	0.58831	-0.19534
A_23_P103334	149041	RC3H1	0.0350201	0.285713	-0.554429
A_23_P103349	10896	OCLM	0.321867	0.602678	-0.10713
A_23_P103361	3932	LCK	0.13413	0.430172	0.134676
A_23_P103371	113451	ADC	0.942911	0.975335	-0.00779746
A_23_P103398	5664	PSEN2	0.458817	0.702551	-0.122782
A_23_P103405	NA		0.0659702	0.338403	-0.270907
A_23_P103414	51441	YTHDF2	0.582789	0.78463	-0.0995135
A_23_P103424	85397	RGS8	0.654452	0.826455	-0.033899
A_23_P103433	127700	OSCP1	0.305061	0.590031	-0.196037
A_23_P103442	64769	MEAF6	0.398453	0.658256	0.100278
A_23_P103454	84224	NBPF3	0.176582	0.473904	0.254967
A_23_P103465	5322	PLA2G5	0.523909	0.749068	-0.0727061
A_23_P103476	29914	UBIAD1	0.746347	0.878986	-0.0183234
A_23_P103486	1573	CYP2J2	0.525302	0.750016	0.0670753
A_23_P103496	115361	GBP4	0.00329029	0.150979	-0.429558
A_23_P103503	4194	MDM4	0.00198962	0.126703	-0.311631
A_23_P103511	400793	C1orf226	0.311093	0.594103	-0.232144
A_23_P103522	6402	SELL	0.939806	0.97404	0.0138443
A_23_P103532	23432	GPR161	0.937326	0.973241	0.0064367
A_23_P10356	10863	ADAM28	0.421872	0.675352	0.0915458
A_23_P103561	89796	NAV1	0.0141409	0.230874	-0.918669
A_23_P103571	10905	MAN1A2	0.507697	0.737413	-0.0314803
A_23_P103588	3158	HMGCS2	0.250617	0.541953	0.167854
A_23_P103601	57134	MAN1C1	0.458242	0.702064	-0.0641507
A_23_P103617	8416	ANXA9	0.722859	0.866459	0.0588195
A_23_P103628	55127	HEATR1	0.0624418	0.3324	0.288652
A_23_P103631	10969	EBNA1BP2	0.209073	0.506145	-0.0975705
A_23_P103661	55249	YY1AP1	0.145739	0.443008	-0.314693
A_23_P103672	10763	NES	0.0947609	0.378847	-0.323911
A_23_P103690	10712	FAM189B	0.15735	0.454665	-0.249061
A_23_P103698	28956	LAMTOR2	0.540672	0.759198	-0.0868033
A_23_P103703	27129	HSPB7	0.245639	0.538159	-0.131049
A_23_P103720	79814	AGMAT	0.0696999	0.342769	-0.331616
A_23_P10374	22864	R3HDM2	0.25018	0.541552	-0.156883
A_23_P103743	NA		0.304698	0.589803	-0.170255
A_23_P103756	5016	OVGP1	0.871382	0.942657	-0.0210014
A_23_P103765	2205	FCER1A	0.352008	0.626654	0.267861
A_23_P103775	84230	LRRC8C	0.0125349	0.225428	0.400485
A_23_P103787	204851	HIPK1	0.051959	0.316785	-0.583168
A_23_P103795	81839	VANGL1	0.0158922	0.237919	0.210643
A_23_P1038	10765	KDM5B	0.28681	0.574125	-0.146625
A_23_P103803	115352	FCRL3	0.687775	0.847358	0.0861134
A_23_P103812	339479	FAM5C	0.109262	0.397791	-0.265237
A_23_P103824	5298	PI4KB	0.189773	0.487452	-0.239952
A_23_P103837	9898	UBAP2L	0.385117	0.649906	-0.0542144
A_23_P10385	51514	DTL	0.273947	0.563245	-0.125626
A_23_P103864	79573	TTC13	0.0270993	0.270533	0.284159
A_23_P103877	126755	LRRC38	0.0115062	0.222054	-0.563709
A_23_P103885	54998	AURKAIP1	0.0913478	0.374149	-0.366572
A_23_P103897	100505741	SPATA1	0.142031	0.439393	0.144102
A_23_P103905	51506	UFC1	0.715121	0.861971	0.0361636
A_23_P10391	1290	COL5A2	0.477634	0.716617	-0.0626603
A_23_P103919	8703	B4GALT3	0.595884	0.792922	0.0742054
A_23_P103923	9917	FAM20B	0.496067	0.729876	0.0622328
A_23_P103932	2268	FGR	0.0223818	0.259115	-0.214966
A_23_P103942	55735	DNAJC11	0.149938	0.447218	-0.391206
A_23_P103951	NA		0.33908	0.61588	0.157848
A_23_P103968	22977	AKR7A3	0.0694287	0.342721	0.318396
A_23_P103971	199974	CYP4Z1	0.475284	0.715066	0.141863
A_23_P103981	723790	HIST2H2AA4	0.0402998	0.29528	-0.7285
A_23_P103996	2730	GCLM	0.767667	0.890036	0.0496534
A_23_P10401	5523	PPP2R3A	0.0257618	0.266711	-0.246152
A_23_P104012	NA		0.866126	0.939747	-0.0239038
A_23_P104022	116461	TSEN15	0.661687	0.830534	-0.0822595
A_23_P104025	116461	TSEN15	0.933062	0.971547	0.00678007
A_23_P104046	10380	BPNT1	0.00205476	0.12878	-0.4479
A_23_P104054	51430	C1orf9	0.968227	0.986074	-0.0016304
A_23_P104065	23463	ICMT	0.0538786	0.319592	0.224349
A_23_P104073	6274	S100A3	0.777576	0.895599	-0.04715
A_23_P104086	9696	CROCC	0.50306	0.734344	-0.0976704
A_23_P104098	127833	SYT2	0.755361	0.883412	0.0332982
A_23_P104109	26750	RPS6KC1	0.0726169	0.346802	0.209468
A_23_P104116	9939	RBM8A	0.0684043	0.341192	-0.246613
A_23_P104138	339500	ZNF678	0.733733	0.872219	0.0318366
A_23_P104146	9202	ZMYM4	0.563972	0.772925	0.0654274
A_23_P104151	51249	TMEM69	0.442941	0.690877	0.114403
A_23_P104188	1999	ELF3	0.124018	0.416507	0.403265
A_23_P104193	3688	ITGB1	0.41908	0.673154	0.265261
A_23_P104199	3688	ITGB1	0.61078	0.800753	0.159272
A_23_P104201	10730	YME1L1	0.418649	0.672997	0.0652195
A_23_P104224	29974	A1CF	0.00558217	0.179881	-0.646018
A_23_P104237	57678	GPAM	0.307069	0.591072	0.134988
A_23_P104252	80760	ITIH5	0.256503	0.54718	-0.182124
A_23_P104275	387700	SLC16A12	0.646535	0.821671	-0.0828925
A_23_P104282	55719	FAM178A	0.41049	0.667358	0.127387
A_23_P104295	6468	FBXW4	0.820632	0.917533	0.0351153
A_23_P1043	55765	C1orf106	0.0762255	0.352847	0.149016
A_23_P104318	54541	DDIT4	0.775429	0.894226	-0.0488731
A_23_P104323	4255	MGMT	0.0826142	0.361198	-0.283091
A_23_P104335	220965	FAM13C	0.0317522	0.279576	-0.285005
A_23_P104346	5305	PIP4K2A	0.00677066	0.190577	-0.442847
A_23_P104351	404636	FAM45A	0.0161484	0.238969	-0.489816
A_23_P104362	1892	ECHS1	0.686937	0.846884	-0.0335111
A_23_P104372	23234	DNAJC9	0.188979	0.486538	0.0831335
A_23_P104387	27069	GHITM	0.197382	0.494511	0.176813
A_23_P104413	22947	DUX4	0.309178	0.592849	-0.182993
A_23_P10442	114876	OSBPL1A	0.024247	0.264198	-0.265139
A_23_P104438	84665	MYPN	0.115981	0.405724	-0.158594
A_23_P104445	118788	PIK3AP1	0.667137	0.833947	-0.108402
A_23_P104451	79009	DDX50	0.479214	0.717858	0.0587814
A_23_P104464	240	ALOX5	0.189376	0.486989	0.243431
A_23_P104471	51207	DUSP13	0.0273411	0.270533	-0.517323
A_23_P104484	338557	O3FAR1	0.373527	0.641887	0.233816
A_23_P104493	9060	PAPSS2	0.248578	0.540379	-0.14406
A_23_P104509	9679	FAM53B	0.238769	0.53187	0.122987
A_23_P104522	10529	NEBL	0.670498	0.836395	-0.0473265
A_23_P104555	26287	ANKRD2	0.728632	0.86959	-0.0448425
A_23_P104563	1374	CPT1A	0.211509	0.508119	-0.112025
A_23_P104579	10263	CDK2AP2	0.528535	0.752137	0.0667219
A_23_P10458	55267	C22orf26	0.972001	0.987904	-0.00737769
A_23_P104583	57175	CORO1B	0.983823	0.992562	0.00306939
A_23_P104594	6343	SCT	0.372405	0.641215	-0.135473
A_23_P104607	5702	PSMC3	0.716661	0.862839	0.0324554
A_23_P104617	120071	GYLTL1B	0.65602	0.827289	-0.07907
A_23_P104624	23052	ENDOD1	0.613886	0.802216	-0.0879993
A_23_P10463	4725	NDUFS5	0.139789	0.437141	-0.455645
A_23_P104641	738	C11orf2	0.38774	0.651388	-0.238049
A_23_P104651	113130	CDCA5	0.134958	0.431243	-0.24474
A_23_P104676	10291	SF3A1	0.716281	0.862584	-0.0443805
A_23_P104689	5970	RELA	0.105494	0.392882	0.245962
A_23_P104692	246330	PELI3	0.130511	0.425772	-0.41674
A_23_P104705	3177	SLC29A2	0.767383	0.890033	0.0552719
A_23_P104734	3703	STT3A	0.219373	0.515087	0.150347
A_23_P104741	84623	KIRREL3	0.153145	0.450122	-0.344702
A_23_P104762	10413	YAP1	0.159066	0.455758	0.25048
A_23_P104798	3606	IL18	0.276042	0.565265	0.139888
A_23_P104804	7704	ZBTB16	0.851287	0.932849	-0.014411
A_23_P104819	11181	TREH	0.387872	0.651388	0.127142
A_23_P104845	1132	CHRM4	0.0672291	0.340043	0.226074
A_23_P104853	7007	TECTA	0.0133795	0.228958	0.397337
A_23_P104865	NA		0.391923	0.654268	0.104048
A_23_P104876	53340	SPA17	0.36313	0.634761	-0.0973399
A_23_P10488	NA		0.783306	0.898529	0.049362
A_23_P104881	54538	ROBO4	0.684131	0.845192	0.0923279
A_23_P104892	1982	EIF4G2	0.0339052	0.284451	0.504244
A_23_P104942	51075	TMX2	0.664748	0.832661	-0.0500171
A_23_P10497	374868	ATP9B	0.0248903	0.264365	0.264723
A_23_P104972	64232	MS4A5	0.0202267	0.252968	0.397
A_23_P104996	7439	BEST1	0.717736	0.863443	-0.0719324
A_23_P10500	374868	ATP9B	0.195632	0.492716	0.476259
A_23_P105002	6094	ROM1	0.0603039	0.328846	-0.432533
A_23_P105012	54979	HRASLS2	0.26705	0.557006	-0.248755
A_23_P105028	25923	ATL3	0.119084	0.409478	-0.131699
A_23_P105044	6150	MRPL23	0.0769884	0.354026	-0.477988
A_23_P10506	27306	HPGDS	0.0875635	0.369624	-0.258645
A_23_P105066	3611	ILK	0.472454	0.713466	0.0567454
A_23_P105088	430	ASCL2	0.583901	0.785354	-0.0762842
A_23_P105118	79324	OR51G1	0.67517	0.839209	-0.0976743
A_23_P105138	847	CAT	0.0110626	0.219417	0.272991
A_23_P105144	57758	SCUBE2	0.00643548	0.186914	-0.302923
A_23_P10518	51270	TFDP3	0.00512038	0.176416	-0.54335
A_23_P105184	116985	ARAP1	0.38154	0.647684	-0.163775
A_23_P105197	726	CAPN5	0.0827069	0.361198	0.320399
A_23_P105212	7069	THRSP	0.836655	0.926178	-0.0203896
A_23_P105227	10873	ME3	0.575938	0.780456	0.0759174
A_23_P10525	NA		0.658649	0.828845	0.0868565
A_23_P105251	2735	GLI1	0.405244	0.663628	-0.115387
A_23_P105264	2120	ETV6	0.341732	0.618314	-0.226069
A_23_P105276	7637	ZNF84	0.586331	0.786996	0.0567233
A_23_P105307	1606	DGKA	0.396846	0.657253	0.0771284
A_23_P105313	1967	EIF2B1	0.912572	0.961886	0.0161217
A_23_P105368	NA		0.0681954	0.34119	0.186252
A_23_P105382	83591	THAP2	0.589403	0.788839	-0.0604895
A_23_P105392	10576	CCT2	0.0197965	0.252665	0.233501
A_23_P105409	7786	MAP3K12	0.0765891	0.353237	0.160146
A_23_P10542	94031	HTRA3	0.650948	0.824417	0.0745415
A_23_P105423	9840	KIAA0748	0.166671	0.464747	-0.198728
A_23_P105436	5781	PTPN11	0.154316	0.451525	-0.151039
A_23_P105442	160622	GRASP	0.0822365	0.361198	-0.305417
A_23_P105453	319101	KRT73	0.189622	0.487351	-0.391394
A_23_P105461	1240	CMKLR1	0.169339	0.467485	0.11334
A_23_P105465	1240	CMKLR1	0.331902	0.609798	-0.135332
A_23_P105475	28234	SLCO1B3	0.566477	0.774289	0.0556311
A_23_P105495	50840	TAS2R14	0.230709	0.525038	0.186972
A_23_P105519	51729	WBP11	1.88e-07	0.0012817	0.37115
A_23_P105524	89869	PLCZ1	0.0324579	0.280991	0.14262
A_23_P105535	282809	POC1B	0.043975	0.304158	0.282187
A_23_P105545	6843	VAMP1	0.112773	0.401886	-0.0808861
A_23_P105562	7450	VWF	0.543657	0.761165	-0.0743004
A_23_P105571	56994	CHPT1	0.181977	0.479425	0.170127
A_23_P105583	83695	C12orf32	0.730614	0.870512	-0.0624072
A_23_P10559	9625	AATK	0.159127	0.455823	-0.302541
A_23_P105592	4598	MVK	0.425402	0.678134	-0.101335
A_23_P1056	51463	GPR89B	0.999669	0.999889	4.49e-05
A_23_P10561	NA		0.0259182	0.2674	-0.432257
A_23_P105619	89894	TMEM116	0.0655355	0.337745	0.119693
A_23_P105625	84274	COQ5	0.189682	0.487387	-0.131479
A_23_P10564	NA		0.138807	0.436333	0.32121
A_23_P105646	466	ATF1	0.593932	0.791755	-0.0776452
A_23_P105651	29951	PDZRN4	0.955275	0.98107	0.00823166
A_23_P105664	29080	CCDC59	0.835303	0.925462	-0.0163282
A_23_P105691	55507	GPRC5D	0.0188293	0.250001	-0.928976
A_23_P105705	2251	FGF6	0.117803	0.408074	0.153427
A_23_P105730	56890	MDM1	0.0453528	0.306278	-0.307804
A_23_P105732	NA		0.00988891	0.21507	-1.08525
A_23_P105747	55198	APPL2	0.424982	0.67796	0.117063
A_23_P105753	11137	PWP1	0.980168	0.991143	0.0019594
A_23_P105794	94240	EPSTI1	0.164917	0.462427	-0.108936
A_23_P105803	2254	FGF9	0.725624	0.868098	-0.0469451
A_23_P105815	NA		0.000251135	0.0581796	-1.94714
A_23_P105833	54841	BIVM	0.134793	0.431039	-0.11369
A_23_P105856	283537	SLC46A3	0.658834	0.828875	-0.0667629
A_23_P105862	10129	FRY	0.0808399	0.359063	0.149653
A_23_P105873	7223	TRPC4	0.220917	0.516485	-0.159655
A_23_P105886	387911	C1QTNF9B	0.0454649	0.30656	0.572163
A_23_P105900	690	BTF3P11	0.667538	0.834295	0.050989
A_23_P10591	284207	METRNL	0.190312	0.487814	-0.197412
A_23_P105923	1735	DIO3	0.409244	0.666688	-0.10264
A_23_P105939	91828	EXOC3L4	0.365812	0.63672	-0.129092
A_23_P105957	87	ACTN1	0.714125	0.861481	-0.0446545
A_23_P105963	122481	AK7	0.896659	0.954587	0.011716
A_23_P105973	256394	SERPINA11	0.0267632	0.269933	-0.544187
A_23_P106	23032	USP33	0.791874	0.90289	0.0691261
A_23_P106002	4792	NFKBIA	0.821065	0.917773	0.0272075
A_23_P106016	5587	PRKD1	0.0813018	0.359865	-0.450615
A_23_P106024	3714	JAG2	0.384801	0.64968	-0.163544
A_23_P106042	116173	CMTM5	0.582574	0.784479	-0.103091
A_23_P10605	NA		0.735878	0.873357	-0.0692366
A_23_P106056	1603	DAD1	0.847454	0.931168	0.0115159
A_23_P106069	NA		0.860251	0.937018	0.0231354
A_23_P106080	84659	RNASE7	0.281567	0.570001	0.422653
A_23_P106103	9495	AKAP5	0.848101	0.931529	-0.0295567
A_23_P106117	4990	SIX6	0.0126465	0.225475	-0.706316
A_23_P106127	9786	KIAA0586	0.0848587	0.365171	-0.217799
A_23_P106131	3895	KTN1	0.0429391	0.301598	0.269773
A_23_P10614	5163	PDK1	0.0153615	0.235469	-0.184992
A_23_P106145	30001	ERO1L	0.0607468	0.329258	0.415236
A_23_P106158	79944	L2HGDH	0.489611	0.725245	0.0882481
A_23_P106162	55320	MIS18BP1	0.00949199	0.212284	-0.571498
A_23_P106174	5663	PSEN1	0.238515	0.531708	-0.251006
A_23_P106194	2353	FOS	0.163563	0.461117	0.26931
A_23_P106204	2954	GSTZ1	0.836215	0.925915	0.0275768
A_23_P106226	29082	CHMP4A	0.403338	0.661978	-0.0913631
A_23_P106236	29018	PRO1768	0.937029	0.973031	-0.0068048
A_23_P106241	9321	TRIP11	0.294008	0.579451	-0.117898
A_23_P106258	283600	SLC25A47	0.190836	0.488122	0.189216
A_23_P106280	55056	FLJ10038	0.417758	0.67225	-0.0605756
A_23_P106299	10169	SERF2	0.154315	0.451525	-0.197927
A_23_P106322	64506	CPEB1	0.0277458	0.271026	-0.512886
A_23_P106362	366	AQP9	0.676966	0.840366	-0.0448119
A_23_P106371	342096	GOLGA6A	0.0176017	0.245545	-0.371885
A_23_P106389	8482	SEMA7A	0.944134	0.976067	-0.0124934
A_23_P106391	56906	THAP10	0.748756	0.880257	0.0311906
A_23_P10640	339221	ENPP7	0.268099	0.557945	-0.117376
A_23_P106405	4692	NDN	0.150981	0.448141	-0.138932
A_23_P106412	NA		0.0169906	0.242892	-1.03978
A_23_P106425	348110	C15orf38	0.0176675	0.245631	-0.186691
A_23_P106433	91433	RCCD1	0.776884	0.895096	0.02412
A_23_P106439	91433	RCCD1	0.261879	0.552435	0.0847404
A_23_P106463	4947	OAZ2	0.184389	0.482016	0.0749941
A_23_P10647	54360	CYTL1	0.0199843	0.252665	-0.603393
A_23_P106472	NA		0.324038	0.604246	-0.221083
A_23_P106481	51234	TMEM85	0.455239	0.699827	0.0719294
A_23_P106497	3658	IREB2	0.210959	0.507709	0.217082
A_23_P106505	9836	LCMT2	0.00404578	0.161569	0.295912
A_23_P106522	54617	INO80	0.644741	0.820622	-0.0526125
A_23_P106532	113189	CHST14	0.929819	0.969886	-0.0150557
A_23_P106544	56942	C16orf61	0.75695	0.884262	0.0172551
A_23_P106559	64718	UNKL	0.99894	0.999613	-7.33e-05
A_23_P106562	2588	GALNS	0.300495	0.5859	0.242517
A_23_P106575	2806	GOT2	0.0457321	0.30695	0.312465
A_23_P106602	83716	CRISPLD2	0.864788	0.93919	0.0202638
A_23_P106617	58189	WFDC1	0.0617241	0.331382	-0.477009
A_23_P106629	10261	IGSF6	0.279009	0.567637	-0.217343
A_23_P106633	55794	DDX28	0.192843	0.489762	-0.214681
A_23_P106656	766	CA7	0.507316	0.737116	-0.0689498
A_23_P106661	113540	CMTM1	0.36337	0.635005	-0.208985
A_23_P106663	100529251	CKLF-CMTM1	0.386829	0.65112	-0.197459
A_23_P106675	5336	PLCG2	0.0569025	0.323746	-0.161424
A_23_P106682	2013	EMP2	0.99229	0.996954	0.00128284
A_23_P106694	5119	CHMP1A	0.175149	0.472509	-0.310928
A_23_P106708	6187	RPS2	0.804396	0.909182	-0.129316
A_23_P106720	10607	TBL3	0.920781	0.966019	-0.0179135
A_23_P106727	9727	RAB11FIP3	0.366108	0.636953	0.0954393
A_23_P106737	55692	LUC7L	0.392183	0.654444	-0.101333
A_23_P106741	5713	PSMD7	0.752485	0.882262	-0.0276932
A_23_P106761	11151	CORO1A	0.253838	0.544785	-0.127699
A_23_P106773	6799	SULT1A2	0.0973529	0.382398	-0.372115
A_23_P106798	6477	SIAH1	0.207602	0.504725	0.328087
A_23_P106806	83886	PRSS27	0.747866	0.879716	0.0529498
A_23_P106814	NA		0.783542	0.898708	-0.0392147
A_23_P106822	28987	NOB1	0.101102	0.38693	0.141739
A_23_P106835	583	BBS2	0.0989776	0.384252	0.158695
A_23_P106844	4502	MT2A	0.739792	0.875482	-0.180819
A_23_P10685	23640	HSPBP1	0.398806	0.658625	-0.244159
A_23_P106859	10328	COX4NB	0.834211	0.924971	0.021384
A_23_P106874	83449	PMFBP1	0.144078	0.441694	-0.150374
A_23_P106887	2521	FUS	0.894526	0.953653	-0.0116911
A_23_P106898	93129	ORAI3	0.95715	0.982075	0.00562364
A_23_P106906	5493	PPL	0.592927	0.79111	0.134059
A_23_P106922	4166	CHST6	0.0353269	0.286246	-0.801007
A_23_P106933	116285	ACSM1	0.865953	0.939684	-0.0332653
A_23_P106945	113	ADCY7	0.0578116	0.324874	-0.252775
A_23_P106973	10801	2009-09-01	0.115702	0.405382	-0.289087
A_23_P10699	29934	SNX12	0.314466	0.597141	-0.208058
A_23_P106998	51649	MRPS23	0.189418	0.487028	0.163913
A_23_P10701	323	APBB2	0.051532	0.316451	-0.297265
A_23_P107036	8834	TMEM11	0.239828	0.532893	-0.0987631
A_23_P107048	NA		0.152319	0.449188	-0.181257
A_23_P107051	8557	TCAP	0.287892	0.574791	-0.315369
A_23_P107064	8711	TNK1	0.292665	0.578556	0.294772
A_23_P107073	6117	RPA1	0.00676452	0.190577	0.196962
A_23_P107087	55720	TSR1	0.0790008	0.356437	0.290317
A_23_P107102	84643	KIF2B	0.310265	0.593473	0.129377
A_23_P107116	7732	RNF112	0.0631349	0.333441	-0.50909
A_23_P107132	5957	RCVRN	0.0512255	0.31618	0.313422
A_23_P107154	84669	USP32	0.635846	0.815136	0.0328704
A_23_P107166	79777	ACBD4	0.162235	0.459314	-0.2117
A_23_P107173	4222	MEOX1	0.069656	0.342769	0.413883
A_23_P1072	476	ATP1A1	0.101029	0.38683	0.299851
A_23_P107206	6774	STAT3	0.159368	0.456196	0.329855
A_23_P10721	9001	HAP1	0.100384	0.386044	0.311112
A_23_P107211	5878	RAB5C	0.0350526	0.285713	-0.156119
A_23_P107214	5878	RAB5C	0.227917	0.52255	-0.0908092
A_23_P107238	54799	MBTD1	0.000564208	0.079128	-0.666362
A_23_P107247	8913	CACNA1G	0.134623	0.430945	0.296909
A_23_P107257	8405	SPOP	0.310555	0.593823	-0.0736978
A_23_P107283	3212	HOXB2	0.896338	0.9545	0.0206089
A_23_P107295	114659	LRRC37B	0.159071	0.455758	0.131352
A_23_P107307	9058	SLC13A2	0.371949	0.641035	-0.22592
A_23_P107313	6388	SDF2	0.159249	0.456079	0.237969
A_23_P107322	84940	CORO6	0.203544	0.500497	-0.320308
A_23_P107336	9744	ACAP1	0.24297	0.535673	0.115199
A_23_P107350	6517	SLC2A4	0.112401	0.4015	0.165548
A_23_P107351	728392	LOC728392	0.0436031	0.303159	0.228243
A_23_P107369	10749	KIF1C	0.403238	0.661867	-0.260924
A_23_P107373	4836	NMT1	0.249237	0.540758	0.082347
A_23_P107394	84667	HES7	0.106866	0.394381	-0.218844
A_23_P107401	7077	TIMP2	0.0838939	0.3631	-0.284286
A_23_P107412	5034	P4HB	0.275118	0.564337	0.21251
A_23_P107421	7083	TK1	0.553696	0.767333	0.076634
A_23_P10743	5158	PDE6B	0.00205734	0.12878	-0.412934
A_23_P107432	NA		0.198418	0.495259	-0.331553
A_23_P107443	100510248	LOC100510248	0.440616	0.689252	0.198664
A_23_P107454	83896	KRTAP3-1	0.218109	0.5137	-0.153868
A_23_P107465	3881	KRT31	0.961071	0.983496	0.0056109
A_23_P107483	8392	OR3A3	0.961212	0.983521	0.00856994
A_23_P107507	10951	CBX1	0.00605194	0.18531	-0.662235
A_23_P107513	79959	CEP76	0.0205115	0.254147	0.277259
A_23_P10753	NA		0.702039	0.855509	-0.0819092
A_23_P107531	125336	LOXHD1	0.775476	0.894226	0.0330103
A_23_P107552	22878	TRAPPC8	0.81083	0.912235	0.0345014
A_23_P107565	361	AQP4	0.124516	0.417107	-0.273459
A_23_P107578	NA		0.121618	0.412672	-0.232208
A_23_P107587	4864	NPC1	0.0508652	0.315433	0.38255
A_23_P107597	5205	ATP8B1	0.948463	0.977852	-0.007825
A_23_P107612	5874	RAB27B	0.383343	0.648685	0.10684
A_23_P107623	89777	SERPINB12	0.119994	0.410562	0.243771
A_23_P107644	6632	SNRPD1	0.0784562	0.355987	-0.236846
A_23_P107653	2109	ETFB	0.0828541	0.361198	-0.377213
A_23_P107661	5518	PPP2R1A	0.702016	0.855507	0.0646685
A_23_P107673	140612	ZFP28	0.467485	0.709552	-0.1386
A_23_P107684	25799	ZNF324	0.216055	0.512621	-0.290834
A_23_P107693	54807	ZNF586	0.171803	0.469217	0.229332
A_23_P107701	2067	ERCC1	0.172517	0.470061	0.103706
A_23_P107714	57787	MARK4	0.241764	0.534556	-0.376184
A_23_P107724	7771	ZFP112	0.558897	0.770271	-0.0399342
A_23_P107735	973	CD79A	0.103057	0.389754	-0.407678
A_23_P107744	53637	S1PR5	0.556081	0.768826	-0.115083
A_23_P107750	53637	S1PR5	0.871681	0.942855	-0.0432038
A_23_P107763	10781	ZNF266	0.936642	0.972891	0.00440616
A_23_P107775	147744	TMEM190	0.995767	0.998552	-0.00175171
A_23_P107795	55101	ATP5SL	0.580346	0.783089	0.0535058
A_23_P107801	84167	C19orf44	0.16299	0.460362	-0.403014
A_23_P107847	353514	LILRA5	0.159389	0.456224	-0.159379
A_23_P10785	143187	VTI1A	0.189935	0.487561	-0.12473
A_23_P107855	84922	FIZ1	0.308651	0.592587	-0.272403
A_23_P107881	147837	ZNF563	0.00845694	0.204844	0.235179
A_23_P107894	78992	YIPF2	0.911518	0.961294	-0.0162627
A_23_P107903	57139	RGL3	0.0509883	0.31573	-0.422983
A_23_P107911	5655	KLK10	0.184415	0.482053	-0.351129
A_23_P107933	51231	VRK3	0.706299	0.8575	0.076148
A_23_P107942	25888	ZNF473	0.345467	0.621507	0.0583426
A_23_P107959	51070	NOSIP	0.317076	0.599035	-0.158712
A_23_P107963	2523	FUT1	0.210882	0.507702	-0.267846
A_23_P107974	2524	FUT2	0.119303	0.409648	-0.168586
A_23_P10798	1267	CNP	0.561103	0.771455	-0.114206
A_23_P107981	6820	SULT2B1	0.158429	0.455382	-0.222693
A_23_P107994	54958	TMEM160	0.283837	0.571909	-0.250295
A_23_P108028	7705	ZNF146	0.456715	0.70094	0.140288
A_23_P108042	9437	NCR1	0.233847	0.527638	0.367408
A_23_P108054	255043	TMEM86B	0.193807	0.49062	-0.412868
A_23_P108062	653499	LGALS7B	0.272625	0.561992	-0.403564
A_23_P108075	56301	SLC7A10	0.460221	0.703664	0.101816
A_23_P108082	84699	CREB3L3	0.0516568	0.316586	-0.48248
A_23_P108103	NA		0.0273341	0.270533	-0.861274
A_23_P108129	7766	ZNF223	0.962282	0.984051	-0.00749454
A_23_P108135	8943	AP3D1	0.00870548	0.206434	-0.969231
A_23_P108143	2593	GAMT	0.277197	0.56603	-0.242124
A_23_P10815	9698	PUM1	0.00587961	0.183319	0.139548
A_23_P108157	27134	TJP3	0.124379	0.417107	0.311346
A_23_P108170	5675	PSG6	0.883189	0.947851	0.0225604
A_23_P108180	116444	GRIN3B	0.0848091	0.365103	0.283038
A_23_P108200	5864	RAB3A	0.198805	0.495741	0.207295
A_23_P108216	5348	FXYD1	0.148177	0.445268	-0.254324
A_23_P108221	83983	TSSK6	0.181931	0.479425	0.147827
A_23_P108244	1340	COX6B1	0.550714	0.765784	-0.15307
A_23_P108265	26658	OR7C2	0.934112	0.971823	0.0207377
A_23_P108280	66002	CYP4F12	0.00826079	0.203594	-0.438828
A_23_P108294	8612	PPAP2C	0.150931	0.448056	0.180506
A_23_P1083	2701	GJA4	0.0141663	0.230874	0.222271
A_23_P108303	4701	NDUFA7	0.472732	0.713728	-0.108537
A_23_P108314	81794	ADAMTS10	0.848909	0.931843	-0.0269811
A_23_P108326	2063	NR2F6	0.320852	0.601863	0.154185
A_23_P108331	6449	SGTA	0.368654	0.638863	-0.207852
A_23_P108342	51276	ZNF571	0.0063915	0.186742	0.292785
A_23_P108376	63892	THADA	0.364829	0.636025	-0.10945
A_23_P10839	4735	2002-09-01	0.472337	0.713421	-0.0918098
A_23_P108394	NA		0.0977922	0.38284	-0.135489
A_23_P108404	116987	AGAP1	0.774232	0.893571	0.0364305
A_23_P108415	1615	DARS	0.750469	0.881122	-0.0341827
A_23_P108427	11227	GALNT5	0.00982811	0.21507	-0.189851
A_23_P108437	7855	FZD5	0.0444655	0.304925	0.243672
A_23_P108463	57539	WDR35	0.0443701	0.3048	0.322317
A_23_P108492	92935	MARS2	0.108344	0.396615	-0.250793
A_23_P108501	2043	EPHA4	0.00173997	0.121199	-0.774694
A_23_P108514	8576	STK16	0.433482	0.683594	-0.0917207
A_23_P108522	79137	FAM134A	0.288305	0.57513	-0.166461
A_23_P108534	NA		0.993286	0.9974	0.00117873
A_23_P108546	5969	REG1P	0.269454	0.559344	0.278014
A_23_P108554	1653	DDX1	0.258627	0.549188	0.0946983
A_23_P108564	8708	B3GALT1	0.387092	0.651163	-0.173407
A_23_P108574	23683	PRKD3	0.646365	0.821613	0.0567025
A_23_P10858	23141	ANKLE2	0.0258286	0.26708	0.296272
A_23_P108592	5534	PPP3R1	0.705474	0.85703	-0.0997267
A_23_P108604	9448	MAP4K4	0.421254	0.675079	0.0777667
A_23_P108641	84908	FAM136A	0.682094	0.843565	0.0564673
A_23_P108657	151525	WDSUB1	0.161477	0.458436	0.166839
A_23_P108662	7841	MOGS	0.245621	0.538153	-0.183315
A_23_P108673	84141	FAM176A	0.0686617	0.341368	0.206255
A_23_P108699	2492	FSHR	0.894597	0.953655	0.020142
A_23_P10870	22845	DOLK	0.629696	0.811897	0.0690096
A_23_P108708	51255	RNF181	0.20953	0.506451	-0.169378
A_23_P10873	7096	TLR1	0.0616629	0.331355	0.152662
A_23_P108734	55821	ALLC	0.0175868	0.245545	-0.219931
A_23_P108743	129446	XIRP2	0.379283	0.646001	0.135662
A_23_P108751	2274	FHL2	0.324323	0.604406	0.0918691
A_23_P108761	55571	C2orf29	0.175571	0.473144	0.369626
A_23_P108785	10096	ACTR3	0.271435	0.561048	0.177272
A_23_P108819	94097	SFXN5	0.434511	0.68428	0.150784
A_23_P108823	114880	OSBPL6	0.02649	0.268914	-0.257116
A_23_P108835	51646	YPEL5	0.0583212	0.325836	0.24838
A_23_P108842	1844	DUSP2	0.445442	0.692388	-0.0746646
A_23_P10885	7767	ZNF224	0.995775	0.998552	-0.000844159
A_23_P108871	84524	ZC3H8	0.989946	0.995814	-0.000873615
A_23_P108883	56660	KCNK12	0.360016	0.632542	-0.168487
A_23_P108911	57159	TRIM54	0.680477	0.842327	-0.0467067
A_23_P108922	55233	MOBKL1B	0.778716	0.89607	-0.0336674
A_23_P108932	56969	RPL23AP32	0.017486	0.245439	-0.482115
A_23_P108948	55686	MREG	0.0428439	0.301362	0.258741
A_23_P108970	4867	NPHP1	0.180527	0.478042	0.138783
A_23_P108990	NA		0.903896	0.957567	0.026642
A_23_P108994	6185	RPN2	0.261395	0.551834	0.262017
A_23_P109001	9675	TTI1	0.118085	0.408415	0.322625
A_23_P109017	6431	SRSF6	0.00418838	0.163203	-0.338281
A_23_P10902	2487	FRZB	0.0829419	0.361345	0.147474
A_23_P109026	60598	KCNK15	0.169019	0.467248	-0.211809
A_23_P109034	6385	SDC4	0.1071	0.394727	0.288501
A_23_P109055	112858	TP53RK	0.96235	0.984054	-0.00508987
A_23_P109072	57167	SALL4	0.03857	0.292684	-0.401643
A_23_P10911	196463	PLBD2	0.319367	0.600703	-0.277356
A_23_P109122	57593	EBF4	0.447861	0.694066	-0.211618
A_23_P109133	551	AVP	0.402844	0.661609	-0.0841574
A_23_P109143	5621	PRNP	0.0273496	0.270533	0.406551
A_23_P109171	631	BFSP1	0.0386339	0.29302	-0.541976
A_23_P109184	3642	INSM1	0.186194	0.483928	-0.228252
A_23_P109193	63908	NAPB	0.234252	0.52781	-0.244345
A_23_P109201	57136	C20orf3	0.0921761	0.375212	0.23875
A_23_P109224	140732	SUN5	0.101718	0.38774	0.239203
A_23_P109229	140732	SUN5	0.729823	0.870227	0.0510967
A_23_P109235	22913	RALY	0.365451	0.636483	0.120228
A_23_P109254	9584	RBM39	0.221354	0.516983	0.240925
A_23_P109269	3911	LAMA5	0.659885	0.829387	-0.087042
A_23_P10927	83877	TM2D2	0.493697	0.728319	0.0989243
A_23_P109286	2897	GRIK1	0.915952	0.963542	-0.0147268
A_23_P109304	6526	SLC5A3	0.190477	0.487844	0.165068
A_23_P109320	53820	DSCR6	0.154149	0.451467	-0.126368
A_23_P109322	5121	PCP4	0.0941969	0.378212	-0.431407
A_23_P109333	8209	C21orf33	0.307494	0.591453	-0.120464
A_23_P109345	754	PTTG1IP	0.042963	0.301598	0.423975
A_23_P10936	85285	KRTAP4-1	0.56178	0.77177	-0.0963239
A_23_P109382	2928	GSC2	0.361878	0.63409	0.154196
A_23_P109393	421	ARVCF	0.646719	0.821758	0.0786645
A_23_P109410	80764	THAP7	0.918689	0.965084	0.0101408
A_23_P109420	9790	BMS1	0.197774	0.494849	0.155195
A_23_P109427	2953	GSTT2	0.199653	0.496348	0.0809339
A_23_P109436	135	ADORA2A	0.430342	0.681272	-0.118452
A_23_P109442	89781	HPS4	0.584585	0.785788	0.0688025
A_23_P109446	89781	HPS4	0.114623	0.404137	0.190949
A_23_P109452	11200	CHEK2	0.114166	0.403603	-0.23361
A_23_P10947	246329	STAC3	0.728005	0.869243	-0.0299557
A_23_P109470	8563	THOC5	0.147193	0.444357	0.245662
A_23_P109488	113791	PIK3IP1	0.5431	0.7608	0.0777638
A_23_P109508	4689	NCF4	0.0262601	0.268327	-0.35824
A_23_P109547	54471	SMCR7L	0.0803011	0.358533	0.184101
A_23_P10956	5239	PGM5	0.266412	0.556618	-0.152389
A_23_P109593	25771	TBC1D22A	0.412368	0.668373	-0.0764637
A_23_P109606	6305	SBF1	0.69649	0.852078	0.0431373
A_23_P109614	4336	MOBP	0.785765	0.899899	-0.046852
A_23_P109636	26018	LRIG1	0.119031	0.40942	-0.202353
A_23_P109643	80325	ABTB1	0.235098	0.528708	-0.325076
A_23_P109655	80723	TMEM22	0.201107	0.497843	0.172852
A_23_P10966	2562	GABRB3	0.860069	0.936867	-0.0383912
A_23_P109677	100506946	LOC100506946	0.21954	0.515263	-0.0829431
A_23_P109682	64343	AZI2	0.641803	0.818646	0.0401355
A_23_P109720	NA		0.519888	0.746206	-0.171399
A_23_P109733	152185	SPICE1	0.129381	0.424402	0.105676
A_23_P109768	9616	RNF7	0.345505	0.621548	0.0484897
A_23_P109774	27107	ZBTB11	0.371926	0.641035	0.142458
A_23_P109785	8856	NR1I2	0.467491	0.709552	-0.135759
A_23_P109794	23243	ANKRD28	0.720123	0.864926	-0.107835
A_23_P10980	23284	LPHN3	0.86521	0.9394	-0.0424594
A_23_P109812	6854	SYN2	0.17566	0.473229	0.282582
A_23_P109821	10474	TADA3	0.53087	0.753554	-0.122089
A_23_P109843	3568	IL5RA	0.504153	0.735152	-0.115949
A_23_P109864	2693	GHSR	0.448114	0.694199	-0.193405
A_23_P10987	NA		0.987758	0.994673	0.00121199
A_23_P109877	80335	WDR82	0.221461	0.516984	0.118274
A_23_P109881	3700	ITIH4	0.41435	0.669544	-0.191466
A_23_P109895	65010	SLC26A6	0.478988	0.717678	0.105872
A_23_P109907	286676	ILDR1	0.00494485	0.17512	-0.983759
A_23_P109913	10663	CXCR6	0.819672	0.916893	-0.0368185
A_23_P109928	9861	PSMD6	0.153895	0.450919	0.291336
A_23_P109934	51409	HEMK1	0.219853	0.515513	-0.256383
A_23_P10995	27303	RBMS3	0.715039	0.861915	-0.0522497
A_23_P109950	93	ACVR2B	0.0088471	0.207425	-0.482046
A_23_P109964	84692	CCDC54	0.362966	0.634727	0.0929232
A_23_P109974	51560	RAB6B	0.677266	0.840637	-0.0383273
A_23_P109988	942	CD86	0.552324	0.76652	-0.104429
A_23_P110005	84276	NICN1	0.148015	0.445206	-0.326854
A_23_P110022	2624	GATA2	0.310398	0.593635	-0.201285
A_23_P110031	51385	ZNF589	0.284721	0.572654	-0.178923
A_23_P11005	11173	ADAMTS7	0.631894	0.813025	-0.112444
A_23_P110052	668	FOXL2	0.0566192	0.322845	-0.399891
A_23_P110062	8893	EIF2B5	0.378949	0.645914	0.0760188
A_23_P110076	348793	WDR53	0.405804	0.66419	-0.0529621
A_23_P110090	55779	WDR52	0.106571	0.394381	0.172868
A_23_P110108	84561	SLC12A8	0.515323	0.743056	0.197616
A_23_P110116	6452	SH3BP2	0.901531	0.956623	0.0208192
A_23_P110122	901	CCNG2	0.302397	0.587651	0.126874
A_23_P110135	57728	WDR19	0.893484	0.953161	0.0120029
A_23_P110151	83478	ARHGAP24	0.558664	0.770175	-0.106147
A_23_P110167	4258	MGST2	0.0685525	0.341276	-0.236838
A_23_P11017	NA		0.0122944	0.223993	-0.505472
A_23_P110175	1519	CTSO	0.232639	0.526624	-0.282192
A_23_P110184	6307	SC4MOL	0.589654	0.789074	-0.135437
A_23_P110196	51191	HERC5	0.319909	0.601073	0.065246
A_23_P1102	58	ACTA1	0.110147	0.399103	-0.258225
A_23_P110204	6374	CXCL5	0.454631	0.699308	0.199672
A_23_P110212	2180	ACSL1	0.0433277	0.302275	0.469759
A_23_P110234	1446	CSN1S1	0.585091	0.785975	0.0909509
A_23_P110243	57721	METTL14	0.915019	0.963178	-0.013492
A_23_P11025	7739	ZNF185	0.0761033	0.352733	-0.173045
A_23_P110253	3815	KIT	0.0477384	0.311096	0.143277
A_23_P110266	79625	NDNF	0.0154863	0.236224	-0.672395
A_23_P110276	84740	AFAP1-AS1	0.016558	0.24125	-0.525675
A_23_P110288	79807	GSTCD	0.380606	0.646967	-0.120622
A_23_P110299	6870	TACR3	0.213566	0.509763	0.65609
A_23_P110304	246175	CNOT6L	0.00324138	0.150152	-0.859637
A_23_P110319	80157	CWH43	0.171641	0.469023	-0.286596
A_23_P11032	84679	SLC9A7	0.77684	0.895077	-0.038984
A_23_P110345	26511	CHIC2	0.572191	0.778181	0.0673625
A_23_P110362	8649	LAMTOR3	0.551094	0.765901	0.0755397
A_23_P110386	64854	USP46	0.0185235	0.24894	-0.530302
A_23_P110403	27295	PDLIM3	0.014049	0.230874	0.316536
A_23_P110412	441027	TMEM150C	0.970105	0.987	-0.00367787
A_23_P110430	4487	MSX1	0.431358	0.682133	-0.179966
A_23_P110433	23398	PPWD1	0.473718	0.714167	0.0633427
A_23_P110445	10307	APBB3	0.895139	0.953844	0.0241547
A_23_P110462	29930	PCDHB1	0.545641	0.762434	0.108523
A_23_P110473	4671	NAIP	0.252135	0.543138	-0.173696
A_23_P110492	10299	2006-03-01	0.0739923	0.349382	-0.680542
A_23_P110504	81037	CLPTM1L	0.0694374	0.342721	0.247029
A_23_P11051	57187	THOC2	0.541539	0.759813	0.13205
A_23_P110531	10468	FST	0.0106635	0.219125	-0.402694
A_23_P110557	90249	UNC5A	0.695897	0.851669	0.0997276
A_23_P110569	55521	TRIM36	0.298027	0.583627	0.050934
A_23_P110571	375449	MAST4	0.296629	0.582573	-0.280412
A_23_P110585	153768	PRELID2	0.185138	0.482836	-0.083298
A_23_P110598	134430	WDR36	0.0637189	0.334461	0.184582
A_23_P110606	9794	MAML1	0.0751851	0.351001	0.290704
A_23_P110611	54826	GIN1	0.572516	0.77834	0.0451079
A_23_P110624	1501	CTNND2	0.00784683	0.200835	-0.382656
A_23_P110643	51265	CDKL3	0.732235	0.87143	0.0328197
A_23_P110655	NA		0.0250847	0.265121	-0.949161
A_23_P110661	23517	SKIV2L2	0.0518742	0.316785	0.311707
A_23_P110686	8614	STC2	0.874317	0.944211	0.0164722
A_23_P110699	91975	ZNF300	0.0108563	0.219403	-1.18894
A_23_P11070	84636	GPR174	0.29905	0.584639	-0.26185
A_23_P110704	10569	SLU7	0.299252	0.5847	-0.165599
A_23_P11071	64840	PORCN	0.118554	0.408944	-0.304572
A_23_P110712	1843	DUSP1	0.0571582	0.324145	0.210889
A_23_P110725	5562	PRKAA1	0.305978	0.590384	-0.0569233
A_23_P110764	9499	MYOT	0.153744	0.450637	0.276092
A_23_P110777	3950	LECT2	0.222193	0.517785	0.177908
A_23_P110787	9522	SCAMP1	0.531597	0.753934	-0.140298
A_23_P110791	1436	CSF1R	0.227762	0.522391	0.258785
A_23_P110802	64946	CENPH	0.155694	0.452952	0.191771
A_23_P11081	8852	AKAP4	0.254864	0.546047	-0.24975
A_23_P110811	1350	COX7C	0.573674	0.779058	-0.134465
A_23_P110837	50805	IRX4	0.358107	0.631093	-0.169691
A_23_P110846	9337	CNOT8	0.0754095	0.351264	0.29504
A_23_P110851	7015	TERT	0.0516985	0.316742	-0.521208
A_23_P110879	10758	TRAF3IP2	0.331637	0.609709	0.12306
A_23_P110882	23270	TSPYL4	0.172698	0.470142	-0.123688
A_23_P110896	26503	SLC17A5	0.083306	0.362056	0.304674
A_23_P110903	135295	SRSF12	0.715053	0.861915	-0.0615466
A_23_P110941	2941	GSTA4	0.858189	0.936131	0.0196537
A_23_P110957	2295	FOXF2	0.00558452	0.179881	0.15956
A_23_P110961	51660	BRP44L	0.271149	0.560875	0.0664268
A_23_P111000	5698	PSMB9	0.786276	0.900156	0.0555844
A_23_P111005	25844	YIPF3	0.892115	0.952288	-0.0153617
A_23_P111020	6722	SRF	0.515619	0.743332	0.0973126
A_23_P11103	9210	BMP15	0.614951	0.802982	0.0634527
A_23_P111037	8350	HIST1H3A	0.16545	0.463155	-0.239445
A_23_P111041	8346	HIST1H2BI	0.155907	0.453087	0.131716
A_23_P111054	3018	HIST1H2BB	0.678133	0.841102	-0.0265173
A_23_P111088	81697	OR2B2	0.429373	0.680755	0.0757053
A_23_P111092	26716	OR2H1	0.261435	0.551887	-0.26705
A_23_P111112	57176	VARS2	0.0423479	0.300184	-0.48748
A_23_P111126	10866	HCP5	0.733512	0.872125	0.039363
A_23_P111132	3303	HSPA1A	0.972992	0.988078	0.00478114
A_23_P111141	7917	BAG6	0.333168	0.610869	0.114756
A_23_P111155	221527	ZBTB12	0.0355334	0.286502	-0.187463
A_23_P111171	8705	B3GALT4	0.231761	0.525854	-0.312743
A_23_P111188	9278	ZBTB22	0.363737	0.635299	0.13886
A_23_P11119	NA		0.0600768	0.328691	0.302472
A_23_P111194	25803	SPDEF	0.723502	0.866932	-0.0257295
A_23_P111206	2289	FKBP5	0.00340524	0.15354	-0.421533
A_23_P111228	51805	COQ3	0.521466	0.747415	0.0388617
A_23_P111240	9749	PHACTR2	0.533546	0.755112	-0.0684046
A_23_P111260	4907	NT5E	0.901276	0.95657	0.0255725
A_23_P111267	83699	SH3BGRL2	0.0553019	0.321545	0.321875
A_23_P111273	51256	TBC1D7	0.00973312	0.214444	0.327412
A_23_P111288	51522	TMEM14C	0.612184	0.801519	-0.0474232
A_23_P111297	10799	RPP40	0.275156	0.564337	0.0507803
A_23_P111303	22828	SCAF8	0.0882529	0.370095	0.223676
A_23_P111306	22828	SCAF8	0.185548	0.483356	0.209773
A_23_P111311	9590	AKAP12	0.665281	0.833054	-0.0791874
A_23_P111321	383	ARG1	0.524913	0.749822	-0.181674
A_23_P111343	9774	BCLAF1	0.0353586	0.286264	-0.281573
A_23_P111360	3298	HSF2	0.554013	0.767401	-0.139664
A_23_P111361	285755	PPIL6	0.54158	0.759813	0.141515
A_23_P111373	57380	MRS2	0.1941	0.490816	0.158666
A_23_P111381	9474	ATG5	0.575366	0.780085	0.0463658
A_23_P111395	6582	SLC22A2	0.32186	0.602678	0.126624
A_23_P111402	84870	RSPO3	0.888733	0.950656	0.0218551
A_23_P111413	95681	TSGA14	0.325973	0.605706	-0.0555624
A_23_P11144	1121	CHM	0.663333	0.8316	-0.122569
A_23_P111452	116988	AGAP3	0.358158	0.631129	-0.135598
A_23_P111480	64940	STAG3L4	0.222831	0.518424	0.135898
A_23_P111481	51593	SRRT	0.532199	0.754203	-0.0727185
A_23_P111487	51593	SRRT	0.642965	0.819449	-0.0482258
A_23_P111492	64598	MOSPD3	0.965071	0.984987	0.00800032
A_23_P111506	100316904	SAP25	0.200795	0.497558	-0.29136
A_23_P111517	64409	WBSCR17	0.103726	0.390333	-0.180572
A_23_P111525	NA		0.105057	0.392218	-0.368559
A_23_P111531	2737	GLI3	0.0377466	0.291772	-0.572611
A_23_P111571	3200	HOXA3	0.347551	0.623424	-0.171988
A_23_P111583	948	CD36	0.854091	0.934229	-0.018392
A_23_P111593	9265	CYTH3	0.493712	0.728319	-0.0650019
A_23_P11160	79649	MAP7D3	0.0161741	0.238969	0.368391
A_23_P111604	30010	NXPH1	0.790768	0.902402	-0.0461785
A_23_P111621	9569	GTF2IRD1	0.807433	0.910611	0.0274563
A_23_P111635	51657	STYXL1	0.414579	0.669688	0.0710568
A_23_P111657	6469	SHH	0.376808	0.644331	-0.0970674
A_23_P111662	340273	ABCB5	0.577223	0.781056	-0.0756708
A_23_P111672	26136	TES	0.188044	0.485842	0.311527
A_23_P111698	7975	MAFK	0.0257064	0.266488	-0.314668
A_23_P1117	54879	ST7L	0.598693	0.794228	0.0870656
A_23_P111701	2791	GNG11	0.925069	0.967819	0.0149224
A_23_P111712	7978	MTERF	0.784909	0.899508	0.0209968
A_23_P111724	154661	RUNDC3B	0.121601	0.412672	0.395346
A_23_P111737	10268	RAMP3	0.0526505	0.318243	-0.240486
A_23_P111745	83637	ZMIZ2	0.538477	0.757991	-0.175748
A_23_P111753	64983	MRPL32	0.452866	0.697928	0.110114
A_23_P111766	NA		0.0242593	0.264198	-0.538279
A_23_P111797	84214	DKFZP434F142	0.747754	0.879682	-0.0660963
A_23_P111804	64761	PARP12	0.0572833	0.324483	-0.325396
A_23_P111811	54556	ING3	0.404133	0.662633	-0.128361
A_23_P111826	6677	SPAM1	0.612592	0.801685	0.0666034
A_23_P111835	1738	DLD	0.174634	0.472202	0.189336
A_23_P111843	10467	ZNHIT1	0.66471	0.832661	-0.0755177
A_23_P111860	55698	RADIL	0.346773	0.622725	-0.175163
A_23_P111865	7589	ZSCAN21	0.241629	0.53449	0.147434
A_23_P111888	115908	CTHRC1	0.0190549	0.250951	-0.514051
A_23_P111919	29942	PURG	0.512019	0.740597	0.0841876
A_23_P11192	10477	UBE2E3	0.108982	0.397437	0.170301
A_23_P111929	51633	OTUD6B	0.195447	0.492674	-0.315174
A_23_P111947	1015	CDH17	0.062813	0.332926	0.367258
A_23_P111961	84549	MAK16	0.0177233	0.245801	0.265563
A_23_P111978	51305	KCNK9	0.512072	0.74063	-0.0814165
A_23_P111981	66004	LYNX1	0.369833	0.639602	-0.28617
A_23_P111995	4017	LOXL2	0.2646	0.555029	-0.0743568
A_23_P112004	23639	LRRC6	0.175207	0.472597	-0.203297
A_23_P11201	2857	GPR34	0.330263	0.608277	-0.197246
A_23_P112016	10395	DLC1	0.0446146	0.304961	0.313918
A_23_P112026	3620	IDO1	0.823777	0.919314	-0.0165889
A_23_P112061	138050	HGSNAT	0.438755	0.687572	-0.0876097
A_23_P112078	9258	MFHAS1	0.242845	0.535561	0.166653
A_23_P112086	1670	DEFA5	0.484004	0.721434	0.162716
A_23_P112100	54212	SNTG1	0.548853	0.764217	0.045103
A_23_P112103	79792	GSDMD	0.223022	0.518449	-0.243379
A_23_P112113	9897	KIAA0196	0.00609839	0.186009	0.287318
A_23_P112135	23471	TRAM1	0.39658	0.657106	0.119931
A_23_P11214	55922	NKRF	0.0450347	0.305273	-0.226944
A_23_P112159	27161	EIF2C2	0.380267	0.646592	0.0551959
A_23_P112162	8694	DGAT1	0.471368	0.712719	-0.146811
A_23_P112173	25769	SLC24A2	0.295761	0.581648	-0.119875
A_23_P112187	84929	FIBCD1	0.575896	0.780445	-0.14009
A_23_P112201	23081	KDM4C	0.000544759	0.0782837	0.301784
A_23_P112220	3641	INSL4	0.249448	0.540806	-0.202123
A_23_P11224	93380	MMGT1	0.0420338	0.299649	0.129309
A_23_P112241	25822	DNAJB5	0.297948	0.58357	-0.207768
A_23_P112251	2790	GNG10	0.0766636	0.353418	0.150258
A_23_P112260	2790	GNG10	0.698439	0.853125	0.06935
A_23_P112275	9568	GABBR2	0.219332	0.515087	0.219447
A_23_P112289	7111	TMOD1	0.449716	0.695618	0.0708507
A_23_P112296	1621	DBH	0.64027	0.817561	-0.0416272
A_23_P112311	22954	TRIM32	0.114016	0.403475	0.29151
A_23_P112327	29991	OBP2A	0.824627	0.919892	0.0252033
A_23_P112341	80010	RMI1	0.800545	0.907293	-0.0212538
A_23_P11237	6872	TAF1	0.0404807	0.295704	-0.375403
A_23_P112397	54461	FBXW5	0.810333	0.912055	-0.0460502
A_23_P112406	9328	GTF3C5	0.743995	0.877705	0.0521487
A_23_P112412	54881	TEX10	0.16456	0.462191	-0.113634
A_23_P112429	11224	RPL35	0.618778	0.805266	-0.256829
A_23_P11244	64219	PJA1	0.0698268	0.342769	0.326583
A_23_P112452	2681	GGTA1P	0.643521	0.819696	-0.117767
A_23_P112470	6366	CCL21	0.945645	0.976695	-0.00707887
A_23_P112478	318	NUDT2	0.236375	0.530191	-0.0751735
A_23_P112481	360	AQP3	0.577513	0.781165	-0.0870215
A_23_P112482	360	AQP3	0.817294	0.915598	-0.0267626
A_23_P112512	92014	MCART1	0.222973	0.518424	-0.1646
A_23_P112531	399665	FAM102A	0.991019	0.996218	-0.00155108
A_23_P112548	81932	HDHD3	0.978038	0.99021	0.00352023
A_23_P112554	1306	COL15A1	0.646409	0.821613	0.0438592
A_23_P11256	139599	MAGEE2	0.713092	0.860868	0.0354684
A_23_P112564	3751	KCND2	0.607478	0.798955	0.142232
A_23_P112596	132	ADK	0.916682	0.963864	0.010787
A_23_P1126	54741	LEPROT	0.16847	0.466708	-0.150472
A_23_P112602	55223	TRIM62	0.431439	0.682208	-0.130382
A_23_P112613	5718	PSMD12	0.505912	0.736277	0.0382194
A_23_P11262	8263	F8A1	0.492983	0.727899	-0.0424732
A_23_P112634	201895	C4orf34	0.255305	0.546176	0.160731
A_23_P112646	28	ABO	0.621002	0.806326	0.0953505
A_23_P112652	25904	CNOT10	0.607275	0.798816	-0.0578057
A_23_P112666	2301	FOXE3	0.588171	0.788177	0.058831
A_23_P112673	55055	ZWILCH	0.0303686	0.276568	-0.339941
A_23_P112698	10687	PNMA2	0.0170858	0.243534	-0.473285
A_23_P112726	6335	SCN9A	0.00160051	0.118641	-0.425766
A_23_P112774	11156	PTP4A3	0.100072	0.385726	-0.338204
A_23_P11279	79868	ALG13	0.0388602	0.293125	0.146715
A_23_P112798	1397	CRIP2	0.871635	0.94283	-0.0170968
A_23_P112801	11261	CHP	0.472499	0.713488	-0.0573786
A_23_P112820	1903	S1PR3	0.399405	0.659164	-0.134349
A_23_P112825	51451	LCMT1	0.271307	0.561003	-0.101083
A_23_P112846	441024	MTHFD2L	0.174563	0.472102	-0.220917
A_23_P112859	1469	CST1	0.0145632	0.232161	-0.384617
A_23_P11286	3188	HNRNPH2	0.0444671	0.304925	0.289088
A_23_P112874	2262	GPC5	0.842734	0.929053	-0.0394665
A_23_P112883	340371	NRBP2	0.513693	0.741938	-0.0682651
A_23_P112916	170691	ADAMTS17	0.786581	0.900229	-0.0663227
A_23_P112921	80765	STARD5	0.370965	0.640483	0.132218
A_23_P11295	100272147	MTCP1NB	0.989476	0.995571	0.00101396
A_23_P112950	55729	ATF7IP	0.0554356	0.321818	0.158049
A_23_P112957	NA		0.160256	0.456965	-0.177587
A_23_P112982	55530	SVOP	0.861629	0.93763	0.0490986
A_23_P113005	1942	EFNA1	0.0851403	0.365822	0.198071
A_23_P113019	348980	HCN1	0.388929	0.65204	0.153824
A_23_P113026	5073	PARN	0.0429506	0.301598	0.214683
A_23_P113034	83938	C10orf11	0.242035	0.53458	-0.162848
A_23_P113056	NA		0.0121744	0.223923	0.310894
A_23_P11309	55558	PLXNA3	0.786269	0.900156	-0.0428342
A_23_P113101	NA		0.908776	0.960051	-0.00812311
A_23_P113111	367	AR	0.20262	0.499452	-0.47031
A_23_P113161	81563	C1orf21	0.290393	0.57688	-0.181305
A_23_P113184	79068	FTO	0.185796	0.483532	0.164051
A_23_P113204	2248	FGF3	0.17011	0.467815	-0.428574
A_23_P113212	55076	TMEM45A	0.233646	0.527488	0.131139
A_23_P113237	64109	CRLF2	0.766735	0.88971	-0.0200484
A_23_P113245	3516	RBPJ	0.0298825	0.275316	0.204204
A_23_P113258	10125	RASGRP1	0.442038	0.690271	-0.0945549
A_23_P113263	NA		0.014246	0.230874	-0.955927
A_23_P113283	64393	ZMAT3	0.0931752	0.376641	0.199372
A_23_P11331	90843	TCEAL8	0.921188	0.966143	0.0106091
A_23_P113311	54681	P4HTM	0.882393	0.947393	-0.0183747
A_23_P113317	54681	P4HTM	0.925634	0.968113	0.00549178
A_23_P113328	360023	ZBTB41	0.612555	0.801685	-0.0801989
A_23_P113351	8404	SPARCL1	0.0741373	0.34966	-0.520291
A_23_P113367	117583	PARD3B	0.0160867	0.238623	-0.389705
A_23_P113380	55031	USP47	0.321927	0.602689	-0.10638
A_23_P113382	23426	GRIP1	0.0824022	0.361198	0.233239
A_23_P113393	8862	APLN	0.472372	0.713437	-0.065799
A_23_P113405	26505	CNNM3	0.127985	0.422768	-0.433298
A_23_P11341	90736	FAM104B	0.362924	0.634727	-0.135461
A_23_P113417	80233	C17orf70	0.545583	0.762434	-0.108927
A_23_P113441	55164	SHQ1	0.274423	0.563509	0.256535
A_23_P113453	NA		0.169963	0.467796	-0.253189
A_23_P113462	55605	KIF21A	0.306515	0.590518	0.209627
A_23_P113471	158584	FAAH2	0.960744	0.983356	-0.00711502
A_23_P113523	8225	GTPBP6	0.0565085	0.322809	-0.389355
A_23_P11353	10159	ATP6AP2	0.622944	0.807381	0.116205
A_23_P113549	NA		0.225769	0.520615	0.282863
A_23_P113553	4110	MAGEA11	0.382876	0.648427	-0.135619
A_23_P113570	3651	PDX1	0.378194	0.645452	-0.181147
A_23_P113572	930	CD19	0.0418325	0.299391	-0.387688
A_23_P113613	64866	CDCP1	0.153404	0.450345	-0.422025
A_23_P11362	9767	PHF16	0.966035	0.985504	-0.00939249
A_23_P113623	84311	MRPL45	0.0318597	0.27971	0.109411
A_23_P113634	865	CBFB	0.0362571	0.288593	0.238572
A_23_P113645	NA		0.935884	0.972556	0.00672446
A_23_P113656	10382	TUBB4	0.295143	0.580879	-0.220551
A_23_P113682	142680	SLC34A3	0.664924	0.832729	-0.0899078
A_23_P113692	NA		0.837253	0.926342	-0.0615242
A_23_P113701	5154	PDGFA	0.0296676	0.274928	-0.658352
A_23_P113716	NA		0.745265	0.878598	0.150863
A_23_P11372	3251	HPRT1	0.744079	0.877705	0.0500712
A_23_P113728	92170	MTG1	0.0216881	0.257307	-0.2292
A_23_P113738	NA		0.586488	0.787104	0.0722645
A_23_P113748	79750	ZNF385D	0.712895	0.860745	-0.0642102
A_23_P113762	NA		0.559899	0.771004	0.0694282
A_23_P113777	9358	ITGBL1	0.541226	0.75966	0.208056
A_23_P113789	10869	USP19	0.262231	0.552501	0.169612
A_23_P113793	79413	ZBED2	0.790239	0.902149	-0.101389
A_23_P113803	11104	KATNA1	0.570777	0.777218	-0.0629179
A_23_P113811	NA		0.317714	0.599394	-0.157446
A_23_P113825	138151	NACC2	0.0957572	0.380246	-0.361446
A_23_P113841	NA		0.165311	0.463057	-0.230293
A_23_P113888	129563	DIS3L2	0.742534	0.877093	-0.0760871
A_23_P11390	9084	VCY	0.00597852	0.184219	-0.700659
A_23_P113952	NA		0.421114	0.675008	0.148191
A_23_P113966	55763	EXOC1	0.588949	0.788548	-0.0384938
A_23_P11397	83868	TTTY13	0.322535	0.603313	-0.12083
A_23_P113972	55763	EXOC1	0.179041	0.476328	0.220732
A_23_P113994	55243	KIRREL	0.256361	0.547095	-0.369442
A_23_P114008	79853	TM4SF20	0.575551	0.780214	-0.135648
A_23_P114048	NA		0.712342	0.86057	-0.0648184
A_23_P114057	54910	SEMA4C	0.124473	0.417107	-0.287049
A_23_P114061	80036	TRPM3	0.066675	0.339106	0.600824
A_23_P114075	2186	BPTF	0.609152	0.799924	0.123614
A_23_P11408	442862	PRY2	0.470275	0.71188	-0.143275
A_23_P114084	5251	PHEX	0.0666526	0.339065	0.152138
A_23_P114095	51360	MBTPS2	0.817113	0.915488	0.0402122
A_23_P114105	23641	LDOC1	0.664922	0.832729	0.038471
A_23_P114118	10389	SCML2	0.246061	0.538534	-0.211771
A_23_P114134	10214	SSX3	0.318028	0.599483	0.173137
A_23_P114144	28952	CCDC22	0.187651	0.485499	-0.1514
A_23_P114155	27238	GPKOW	0.183674	0.481084	-0.128105
A_23_P114164	29978	UBQLN2	0.737078	0.873946	-0.0430705
A_23_P114172	54885	TBC1D8B	0.106474	0.394292	-0.210434
A_23_P114185	7102	TSPAN7	0.0465627	0.308748	-0.232254
A_23_P114210	5456	POU3F4	0.668702	0.835114	-0.0326835
A_23_P114221	5931	RBBP7	0.0276976	0.270943	0.285825
A_23_P114232	10549	PRDX4	0.653267	0.825697	0.0270468
A_23_P114259	140456	ASB11	0.123277	0.415077	0.175805
A_23_P114275	10857	PGRMC1	0.112632	0.401592	-0.287157
A_23_P114282	28985	MCTS1	0.132881	0.429041	-0.245622
A_23_P114299	2833	CXCR3	0.598111	0.793918	-0.0912319
A_23_P114307	5030	P2RY4	0.157001	0.454199	0.171158
A_23_P114314	1046	CDX4	0.408779	0.666161	0.125257
A_23_P114349	170626	XAGE3	0.0397808	0.294567	-0.531648
A_23_P114353	55998	NXF5	0.335544	0.612771	-0.144825
A_23_P114361	4204	MECP2	0.0381801	0.292193	-0.512117
A_23_P114374	5956	OPN1LW	0.774043	0.893511	-0.0657974
A_23_P114381	26576	SRPK3	0.492967	0.727899	-0.0618194
A_23_P114405	9643	MORF4L2	0.336982	0.613722	0.211305
A_23_P114414	79836	LONRF3	0.161774	0.458787	0.0684861
A_23_P114423	9104	RGN	0.055596	0.321823	-0.383653
A_23_P114445	57692	MAGEE1	0.000855337	0.0950374	0.266442
A_23_P114466	90665	TBL1Y	0.0441519	0.304486	-0.410262
A_23_P1145	55149	MTPAP	0.44535	0.69235	0.0739944
A_23_P114582	NA		0.734915	0.872795	-0.0654759
A_23_P114585	80003	PCNXL2	0.714349	0.861603	-0.0320845
A_23_P114597	6706	SPRR2G	0.0133376	0.228958	-0.32189
A_23_P11461	7335	UBE2V1	0.00227902	0.13354	-0.2883
A_23_P114616	81573	ANKRD13C	0.594399	0.791867	0.0303626
A_23_P114626	462	SERPINC1	0.0186742	0.249274	-0.708053
A_23_P114649	60672	MIIP	0.090837	0.373141	-0.279415
A_23_P114656	3065	HDAC1	0.0868603	0.368318	0.090174
A_23_P114662	1429	CRYZ	0.236601	0.530376	0.186516
A_23_P114670	27237	ARHGEF16	0.559213	0.770447	-0.113107
A_23_P114689	55616	ASAP3	0.562804	0.772436	-0.0875838
A_23_P114707	9563	H6PD	0.407722	0.66555	0.0966977
A_23_P114713	1580	CYP4B1	0.0720468	0.346181	0.317452
A_23_P114736	3766	KCNJ10	0.632342	0.813101	-0.0456497
A_23_P114740	3075	CFH	0.21097	0.507709	-0.403881
A_23_P114774	10654	PMVK	0.107983	0.396222	-0.278958
A_23_P114783	142	PARP1	0.702607	0.855739	-0.0353076
A_23_P114808	51102	MECR	0.781171	0.897498	0.0200466
A_23_P114814	58480	RHOU	0.599315	0.794509	0.0659984
A_23_P114826	64960	MRPS15	0.229577	0.524061	-0.221226
A_23_P114839	2275	FHL3	0.246003	0.538504	0.197308
A_23_P114857	30814	PLA2G2E	0.649955	0.823885	-0.0634077
A_23_P114862	10218	ANGPTL7	0.852821	0.933688	0.0421364
A_23_P114879	51361	HOOK1	0.0698308	0.342769	0.303726
A_23_P114883	2331	FMOD	0.85	0.932391	-0.031458
A_23_P114903	3310	HSPA6	0.00127314	0.109112	-0.316553
A_23_P114929	25874	BRP44	0.217384	0.513349	0.104375
A_23_P114934	84944	MAEL	0.335255	0.612627	0.117538
A_23_P114947	5997	RGS2	0.160131	0.456965	0.115997
A_23_P114952	252839	TMEM9	0.388178	0.651652	0.106764
A_23_P114968	5738	PTGFRN	0.738085	0.874612	-0.0382703
A_23_P114983	84676	TRIM63	0.0207172	0.254353	-0.576312
A_23_P115011	54507	ADAMTSL4	0.53911	0.758221	0.0776548
A_23_P115021	88	ACTN2	0.945487	0.976695	0.0101402
A_23_P115022	128218	TMEM125	0.390133	0.653061	-0.229998
A_23_P115036	9670	IPO13	0.297362	0.583202	-0.191449
A_23_P115046	8891	EIF2B3	0.9061	0.958613	-0.023213
A_23_P115052	6016	RIT1	0.226845	0.521774	0.148332
A_23_P115064	1382	CRABP2	0.160834	0.457835	-0.262166
A_23_P11507	26009	ZZZ3	0.0788347	0.356353	0.232205
A_23_P115091	57111	RAB25	0.885117	0.948865	-0.023055
A_23_P115105	26099	C1orf144	0.130492	0.425767	-0.153072
A_23_P115118	656	BMP8B	0.285269	0.573013	-0.206786
A_23_P115124	81559	TRIM11	0.162268	0.459325	-0.364668
A_23_P115137	10542	HBXIP	0.649708	0.823817	-0.0448549
A_23_P115149	79084	WDR77	0.0943811	0.378584	0.17332
A_23_P115161	2532	DARC	0.926578	0.968606	0.0169119
A_23_P115167	23507	LRRC8B	0.0818528	0.360568	0.132801
A_23_P115190	4803	NGF	0.240784	0.533809	0.294734
A_23_P115192	83417	FCRL4	0.1514	0.448439	0.433587
A_23_P115200	83417	FCRL4	0.0499226	0.31439	0.533035
A_23_P115201	83417	FCRL4	0.202049	0.498887	0.206382
A_23_P115202	49860	CRNN	0.610678	0.800672	0.0850195
A_23_P115215	6944	VPS72	0.269086	0.559	-0.191025
A_23_P115223	10456	HAX1	0.594974	0.792248	-0.0389045
A_23_P115246	8547	FCN3	0.242553	0.53512	-0.145538
A_23_P115261	183	AGT	0.0548564	0.32102	-0.383753
A_23_P115286	8915	BCL10	0.00880801	0.207108	-0.361704
A_23_P115313	64222	TOR3A	0.342936	0.619251	-0.0760878
A_23_P115316	64222	TOR3A	0.623747	0.80809	0.0335525
A_23_P115331	27245	AHDC1	0.0477427	0.311096	-0.73919
A_23_P115346	1939	EIF2D	0.413348	0.668989	0.0860151
A_23_P115356	8574	AKR7A2	0.0308343	0.278373	0.261636
A_23_P115366	51727	CMPK1	0.43266	0.683138	0.147724
A_23_P115375	653604	HIST2H3D	0.858203	0.936131	0.00995697
A_23_P115407	2944	GSTM1	0.0494182	0.313173	-0.105579
A_23_P115417	23179	RGL1	0.0700336	0.342769	-0.371402
A_23_P11543	2517	FUCA1	0.0162744	0.239759	0.158339
A_23_P115444	8995	TNFSF18	0.379259	0.646001	0.342477
A_23_P115460	6146	RPL22	0.608153	0.799201	-0.0632673
A_23_P115467	6276	S100A5	0.320967	0.601941	0.108722
A_23_P115478	29943	PADI1	0.823494	0.919146	-0.0449175
A_23_P115482	29089	UBE2T	0.15308	0.450041	0.0738952
A_23_P115492	79805	VASH2	0.222535	0.518143	-0.188679
A_23_P115519	84648	LCE3D	0.942349	0.974967	0.0102771
A_23_P115523	65094	JMJD4	0.318077	0.599483	-0.147953
A_23_P115534	79932	KIAA0319L	0.373404	0.64183	-0.116997
A_23_P115563	81472	OR2C3	0.00349349	0.154513	-0.550723
A_23_P115573	149345	SHISA4	0.296732	0.582683	-0.223744
A_23_P115597	22852	ANKRD26	0.349243	0.624638	0.0846246
A_23_P115608	57584	ARHGAP21	0.340112	0.616725	0.192207
A_23_P115616	NA		0.792222	0.903005	-0.0194348
A_23_P115636	1787	TRDMT1	0.325128	0.605018	0.103717
A_23_P11564	9813	KIAA0494	0.00132137	0.110339	-0.244358
A_23_P115645	10659	CELF2	0.0274618	0.270533	-0.298466
A_23_P115652	653509	SFTPA1	0.986457	0.993977	-0.00231346
A_23_P115683	79803	HPS6	0.703305	0.856012	0.0280931
A_23_P115699	5662	PSD	0.747677	0.87967	-0.0417052
A_23_P115703	84108	PCGF6	0.835016	0.925389	0.0231928
A_23_P115726	220963	SLC16A9	0.254844	0.546047	-0.11179
A_23_P115732	648	BMI1	0.0858415	0.3665	0.1213
A_23_P115743	63877	FAM204A	0.0683145	0.341192	-0.31405
A_23_P115762	11319	ECD	0.0662869	0.33874	-0.222921
A_23_P115780	26103	LRIT1	0.251657	0.542593	0.131889
A_23_P115785	92565	FANK1	0.722392	0.866203	0.0392785
A_23_P115792	59338	PLEKHA1	0.00780462	0.200118	-0.437173
A_23_P115805	93426	SYCE1	0.805941	0.909916	0.0296742
A_23_P115824	3189	HNRNPH3	0.269286	0.559136	0.131014
A_23_P115838	26148	C10orf12	0.00498728	0.175223	0.455706
A_23_P115842	55749	CCAR1	0.353391	0.627539	0.147592
A_23_P115861	220992	ZNF485	0.662627	0.831036	0.0390164
A_23_P115862	118881	COMTD1	0.106785	0.394381	-0.401974
A_23_P115872	55165	CEP55	0.407471	0.665405	-0.059477
A_23_P115885	9562	MINPP1	0.480211	0.718622	0.166149
A_23_P115902	NA		9.22e-05	0.0382669	-0.834245
A_23_P115919	5264	PHYH	0.758574	0.885302	0.0345442
A_23_P115922	1979	EIF4EBP2	0.892243	0.952333	-0.0170919
A_23_P115932	338567	KCNK18	0.941922	0.974927	-0.0107057
A_23_P115955	219927	MRPL21	0.220883	0.516435	-0.278442
A_23_P11598	127396	ZNF684	0.621547	0.806575	0.0741181
A_23_P115998	6688	SPI1	0.0801045	0.35835	-0.180046
A_23_P116007	9479	MAPK8IP1	0.846572	0.930706	-0.0345759
A_23_P116013	10929	SRSF8	0.85221	0.933268	-0.0445227
A_23_P116016	10929	SRSF8	0.00332959	0.151193	0.221014
A_23_P116025	9440	MED17	0.77391	0.893511	0.0298798
A_23_P116037	7108	TM7SF2	0.946287	0.976856	0.00877005
A_23_P116081	84153	RNASEH2C	0.242974	0.535673	-0.206054
A_23_P116091	10072	DPP3	0.181442	0.478916	0.16821
A_23_P116114	5140	PDE3B	0.0664678	0.3388	-0.357352
A_23_P116123	1111	CHEK1	0.897393	0.954896	0.0129847
A_23_P116145	414301	DDI1	0.794569	0.904363	-0.0338233
A_23_P116168	84437	KIAA1826	0.275132	0.564337	0.0833004
A_23_P116173	120376	C11orf93	0.321954	0.602689	-0.23667
A_23_P116187	83875	BCO2	0.104999	0.392197	-0.146276
A_23_P116195	NA		0.580537	0.783218	0.0920822
A_23_P116207	56912	IFT46	0.292103	0.578003	0.117925
A_23_P116235	4192	MDK	0.923987	0.967278	-0.0150603
A_23_P116249	2900	GRIK4	0.580098	0.782859	0.119177
A_23_P116259	55800	SCN3B	0.693753	0.850314	-0.0566979
A_23_P116264	4900	NRGN	0.368931	0.639205	-0.330021
A_23_P116280	7490	WT1	0.161481	0.458436	0.249185
A_23_P116286	272	AMPD3	0.182238	0.479668	-0.147003
A_23_P11629	199964	TMEM61	0.228438	0.5228	-0.200689
A_23_P116371	931	MS4A1	0.336242	0.613314	-0.238704
A_23_P116376	79869	CPSF7	0.00670454	0.189707	0.343294
A_23_P116387	3619	INCENP	0.0315422	0.279402	-0.298559
A_23_P116414	11145	PLA2G16	0.0538036	0.319286	-0.371853
A_23_P116430	10083	USH1C	0.234546	0.528101	-0.223195
A_23_P116435	51214	IGF2AS	0.629193	0.811632	-0.0884852
A_23_P11644	6703	SPRR2D	0.45854	0.702363	-0.186233
A_23_P116473	NA		0.000677471	0.0864435	-0.631299
A_23_P116512	79899	PRR5L	0.0329044	0.281871	0.290548
A_23_P11652	7398	USP1	0.129552	0.42449	0.158105
A_23_P116523	NA		0.0384792	0.292482	0.416951
A_23_P116533	23075	SWAP70	0.440301	0.6891	0.0649524
A_23_P116557	3965	LGALS9	0.489289	0.725094	-0.124374
A_23_P116578	51585	PCF11	0.476969	0.716092	0.0390667
A_23_P116587	4975	OMP	0.473823	0.714167	0.109221
A_23_P116602	57558	USP35	0.10965	0.398338	-0.449849
A_23_P116614	10873	ME3	0.798897	0.906556	0.0303516
A_23_P116624	9152	SLC6A5	0.329849	0.608085	0.0932402
A_23_P11664	9295	SRSF11	0.54202	0.760041	0.152999
A_23_P116640	79345	OR51B2	0.249011	0.54064	-0.211498
A_23_P116642	65012	SLC26A10	0.643848	0.819959	-0.0727091
A_23_P116653	79370	BCL2L14	0.412457	0.668383	-0.0959903
A_23_P116679	5036	PA2G4	0.469887	0.711479	0.0406459
A_23_P116682	6601	SMARCC2	0.202716	0.499452	0.230901
A_23_P116694	6231	RPS26	0.729161	0.869868	-0.152857
A_23_P116712	11228	RASSF8	0.208675	0.505685	0.239695
A_23_P11674	5737	PTGFR	0.350818	0.625858	-0.311091
A_23_P116741	9271	PIWIL1	0.918175	0.96484	0.0163099
A_23_P116743	338799	LOC338799	0.759926	0.885848	-0.0689229
A_23_P116765	3906	LALBA	0.266416	0.556618	0.280635
A_23_P116797	60314	C12orf10	0.488061	0.724364	-0.0905965
A_23_P116809	22818	COPZ1	0.229614	0.524073	0.204177
A_23_P116829	7334	UBE2N	0.226398	0.5213	0.134447
A_23_P116840	60673	C12orf44	0.800978	0.907402	-0.0258248
A_23_P11685	5321	PLA2G4A	0.0795665	0.357352	0.291422
A_23_P116850	3849	KRT2	0.249418	0.540806	0.656669
A_23_P116868	53919	SLCO1C1	0.645993	0.821441	0.04658
A_23_P116872	5545	PRB4	0.579907	0.782755	0.0455957
A_23_P116890	5544	PRB3	0.338472	0.615267	-0.125737
A_23_P116898	2	A2M	0.0179061	0.246357	-0.428614
A_23_P116902	420	ART4	0.605105	0.797752	-0.115229
A_23_P116913	121536	AEBP2	0.000379441	0.0680396	-0.56476
A_23_P116942	3902	LAG3	0.0610711	0.330288	-0.426255
A_23_P11697	127540	HMGB4	0.485713	0.722525	0.0861673
A_23_P116980	7289	TULP3	0.0342191	0.284795	-0.404106
A_23_P116999	51184	GPN3	0.690223	0.848576	0.0534673
A_23_P1170	93550	ANUBL1	0.0676091	0.340688	0.204995
A_23_P117037	25875	LETMD1	0.34517	0.621082	0.0769041
A_23_P11705	55108	BSDC1	0.448518	0.694541	-0.163699
A_23_P117059	9194	SLC16A7	0.0276263	0.270937	0.485469
A_23_P117068	6636	SNRPF	0.149087	0.446193	-0.190104
A_23_P117082	50865	HEBP1	0.463052	0.705954	-0.0914095
A_23_P117095	8074	FGF23	0.0377588	0.291772	0.584129
A_23_P117104	362	AQP5	0.357621	0.630562	-0.198531
A_23_P117125	5916	RARG	0.33026	0.608277	0.227599
A_23_P11713	8073	PTP4A2	0.203374	0.500291	0.201786
A_23_P117146	11108	PRDM4	0.0514453	0.316405	0.260152
A_23_P117157	8803	SUCLA2	0.20785	0.504926	0.222215
A_23_P117163	55213	RCBTB1	0.363028	0.634727	0.144225
A_23_P117175	143	PARP4	0.150296	0.447676	0.187645
A_23_P117190	29103	DNAJC15	0.391496	0.654062	-0.1095
A_23_P117198	78988	MRP63	0.971237	0.987642	-0.0052102
A_23_P117225	2073	ERCC5	0.986092	0.993824	-0.00152056
A_23_P117238	79587	CARS2	0.964441	0.984761	0.00628785
A_23_P117242	6541	SLC7A1	0.555013	0.768052	0.102131
A_23_P117261	122042	RXFP2	0.277561	0.566254	0.160395
A_23_P117274	4285	MIPEP	0.19897	0.495845	0.186003
A_23_P117286	1203	CLN5	0.145621	0.443004	-0.134806
A_23_P11729	51043	ZBTB7B	0.495474	0.729554	-0.1542
A_23_P117298	2155	F7	0.539755	0.758602	-0.0962242
A_23_P1173	3026	HABP2	0.257603	0.548168	0.161141
A_23_P117302	NA		0.0783201	0.355929	-0.301809
A_23_P117346	8816	DCAF5	0.444881	0.692124	-0.104794
A_23_P117363	866	SERPINA6	0.0536205	0.319202	-0.592812
A_23_P117380	90050	FAM181A	0.274408	0.563509	0.129792
A_23_P117387	117153	MIA2	0.845119	0.930123	0.0412462
A_23_P11739	83881	MIXL1	0.625929	0.809791	-0.285136
A_23_P117411	2290	FOXG1	0.731233	0.870892	-0.0591638
A_23_P117416	2972	BRF1	0.305145	0.590055	-0.300797
A_23_P11742	375260	WASH2P	0.13277	0.428965	-0.220166
A_23_P117424	80344	DCAF11	0.858568	0.936304	-0.0218585
A_23_P117437	64806	IL25	0.0594941	0.327901	-0.364952
A_23_P11744	100287171	WASH1	0.333835	0.611499	-0.203836
A_23_P117447	55017	C14orf119	0.266729	0.556647	0.141609
A_23_P117464	122664	TPPP2	0.753889	0.882723	0.0464211
A_23_P117480	NA		0.745304	0.878618	0.0495434
A_23_P117494	4522	MTHFD1	0.0134329	0.229235	0.259979
A_23_P117506	51635	DHRS7	0.457025	0.701169	0.132152
A_23_P117515	5926	ARID4A	0.605772	0.798145	-0.0765051
A_23_P11752	4985	OPRD1	0.136401	0.433255	-0.144009
A_23_P117527	55030	FBXO34	0.0284571	0.272966	0.312011
A_23_P117540	6815	STYX	0.38335	0.648685	0.0682084
A_23_P117546	6655	SOS2	0.0310665	0.278903	0.227434
A_23_P117558	2287	FKBP3	0.215074	0.511545	0.152782
A_23_P117580	957	ENTPD5	0.11061	0.39963	0.102053
A_23_P117582	122953	JDP2	0.32859	0.607281	-0.223579
A_23_P117599	10598	AHSA1	0.296085	0.582062	0.207913
A_23_P117602	3002	GZMB	0.33768	0.614427	0.0598283
A_23_P117623	55775	TDP1	0.935153	0.972365	-0.00486818
A_23_P117635	4287	ATXN3	0.189947	0.487563	-0.149881
A_23_P11764	26523	EIF2C1	0.293656	0.57913	-0.151394
A_23_P117654	4644	MYO5A	0.558697	0.770176	-0.0501346
A_23_P117662	3067	HDC	0.515702	0.743374	-0.0550043
A_23_P117679	7782	SLC30A4	0.0356139	0.286802	-0.34822
A_23_P117683	25764	C15orf63	0.0550806	0.32133	-0.388527
A_23_P117694	10391	CORO2B	0.582631	0.784495	-0.0708939
A_23_P117721	6218	RPS17	0.414737	0.66981	-0.373058
A_23_P117727	123263	MTFMT	0.738913	0.874926	0.0321809
A_23_P117734	145748	LYSMD4	0.317088	0.599035	-0.164561
A_23_P11774	51118	UTP11L	0.432787	0.683208	0.0518373
A_23_P117743	140460	ASB7	0.00666728	0.189519	0.197806
A_23_P117759	145781	GCOM1	0.912814	0.961968	-0.0245061
A_23_P117767	54939	COMMD4	0.0446198	0.304961	-0.104887
A_23_P117778	84993	UBL7	0.650648	0.824146	0.0607407
A_23_P117782	55323	LARP6	0.112049	0.401098	-0.23298
A_23_P117797	54982	CLN6	0.259061	0.54948	-0.129054
A_23_P117805	8128	ST8SIA2	0.441547	0.689901	0.0742995
A_23_P117828	NA		0.784437	0.899333	-0.0435442
A_23_P117833	54893	MTMR10	0.280909	0.56943	-0.125166
A_23_P117851	594855	CPLX3	0.0249555	0.264729	0.416664
A_23_P117852	9768	KIAA0101	0.0207765	0.254439	0.240839
A_23_P117862	56160	NDNL2	0.518955	0.745547	0.0774272
A_23_P11787	54361	WNT4	0.577938	0.781435	0.148808
A_23_P117873	1133	CHRM5	0.9487	0.977992	-0.00908549
A_23_P117882	1381	CRABP1	0.0292091	0.274381	-0.455944
A_23_P117896	116179	TGM7	0.96794	0.986005	-0.00426177
A_23_P117912	171177	RHOV	0.891549	0.952182	-0.0161521
A_23_P117928	22893	BAHD1	0.182644	0.48015	0.102353
A_23_P117933	2653	GCSH	0.278132	0.566946	0.134953
A_23_P117943	NA		0.530555	0.753263	-0.0778441
A_23_P117955	353	APRT	0.244462	0.537241	-0.206309
A_23_P117971	NA		0.0127239	0.225475	-0.893298
A_23_P117980	10300	KATNB1	0.779659	0.896638	0.026069
A_23_P117992	9914	ATP2C2	0.551081	0.765901	0.108466
A_23_P118	2135	EXTL2	0.0890946	0.370813	0.253342
A_23_P11800	55450	CAMK2N1	0.235856	0.529578	0.0856778
A_23_P118002	7385	UQCRC2	0.60655	0.79854	0.06958
A_23_P118018	283897	C16orf54	0.484928	0.722079	0.0912682
A_23_P118025	64174	DPEP2	0.0808923	0.359063	0.194741
A_23_P118038	10204	NUTF2	0.00191784	0.125157	-0.448927
A_23_P118042	55282	LRRC36	0.198828	0.495741	-0.170214
A_23_P11806	1301	COL11A1	0.216656	0.512986	-0.258285
A_23_P118061	51192	CKLF	0.679271	0.841622	0.0384499
A_23_P118065	3294	HSD17B2	0.0283848	0.272707	-0.3771
A_23_P118086	124044	SPATA2L	0.130112	0.425296	-0.410757
A_23_P118095	6123	RPL3L	0.016478	0.240598	0.713457
A_23_P118105	4716	NDUFB10	0.622872	0.807339	-0.105458
A_23_P118113	6650	SOLH	0.969488	0.986695	0.00592102
A_23_P118122	8786	RGS11	0.1379	0.435452	-0.391401
A_23_P118135	NA		0.258096	0.548714	-0.307594
A_23_P118150	23204	ARL6IP1	0.895752	0.95419	0.0282234
A_23_P118158	9956	HS3ST2	0.591341	0.790074	-0.21206
A_23_P118174	5347	PLK1	0.0335283	0.283158	-0.205743
A_23_P118185	83752	LONP2	0.0464091	0.3082	0.333206
A_23_P118195	NA		0.770836	0.891639	-0.0488586
A_23_P118203	124220	ZG16B	0.1197	0.409884	-0.287694
A_23_P118234	221223	CES5A	0.386549	0.650757	0.17382
A_23_P118246	51659	GINS2	0.183681	0.481084	0.0487078
A_23_P118254	2294	FOXF1	0.270582	0.56058	-0.149073
A_23_P118266	463	ZFHX3	0.193679	0.490508	-0.195621
A_23_P118289	9274	BCL7C	0.121109	0.411937	-0.309254
A_23_P118300	81889	FAHD1	0.988933	0.995254	-0.00243308
A_23_P118306	9093	DNAJA3	0.108334	0.396614	0.146848
A_23_P118313	11345	GABARAPL2	0.204957	0.501825	0.145142
A_23_P118327	55623	THUMPD1	0.809545	0.911742	-0.0320086
A_23_P118334	64282	PAPD5	0.0398164	0.294567	0.399464
A_23_P118353	6730	SRP68	0.333342	0.611011	0.202066
A_23_P118370	NA		0.0717147	0.345801	-0.263861
A_23_P118392	51655	RASD1	0.328982	0.607565	0.101982
A_23_P118406	79415	C17orf62	0.0752583	0.351054	-0.394941
A_23_P11841	493	ATP2B4	0.357408	0.630349	-0.134765
A_23_P118412	283987	C17orf28	0.511366	0.740269	-0.167759
A_23_P118427	5606	MAP2K3	0.374551	0.642597	0.18361
A_23_P11843	10446	LRRN2	0.0364496	0.288957	-0.667616
A_23_P118435	6613	SUMO2	0.092981	0.376309	0.272247
A_23_P118451	10948	STARD3	0.24565	0.538159	0.188834
A_23_P118462	124641	OVCA2	0.617146	0.804009	0.0479193
A_23_P118493	10040	TOM1L1	0.261206	0.551635	0.178186
A_23_P118516	51030	FAM18B1	0.151751	0.448741	0.280634
A_23_P118536	55106	SLFN12	0.0017691	0.121466	0.383806
A_23_P118544	1213	CLTC	0.234997	0.528662	0.109103
A_23_P118552	10614	HEXIM1	0.641986	0.818739	-0.0551554
A_23_P118571	50964	SOST	0.284337	0.572302	0.161772
A_23_P118581	92591	ASB16	0.111724	0.400766	-0.188778
A_23_P11859	51478	HSD17B7	0.23661	0.530376	-0.0990453
A_23_P1186	389941	C1QL3	0.588697	0.788365	0.0949159
A_23_P118607	80755	AARSD1	0.176282	0.473904	-0.112453
A_23_P118615	10351	ABCA8	0.403681	0.662197	-0.185316
A_23_P11862	55732	C1orf112	0.377696	0.645016	-0.0665505
A_23_P118633	64847	SPATA20	0.39572	0.656305	-0.126885
A_23_P118643	1977	EIF4E	0.562682	0.77236	0.0986943
A_23_P118649	1977	EIF4E	0.354782	0.628358	0.200735
A_23_P118660	11056	DDX52	0.220954	0.516526	-0.148833
A_23_P118675	3211	HOXB1	0.153647	0.450579	-0.201225
A_23_P118690	7756	ZNF207	0.0394024	0.293994	0.36488
A_23_P118693	8456	FOXN1	0.877653	0.945274	-0.015712
A_23_P118705	6388	SDF2	0.291129	0.577468	0.10294
A_23_P118712	85464	SSH2	0.060546	0.329006	-0.142461
A_23_P118722	432	ASGR1	0.138508	0.436167	-0.267174
A_23_P11874	9019	MPZL1	0.143178	0.44073	-0.131896
A_23_P118741	201232	SLC16A13	0.571884	0.778074	-0.121128
A_23_P118749	51009	DERL2	0.175263	0.472719	0.116316
A_23_P118774	3837	KPNB1	0.124321	0.417037	0.206995
A_23_P118791	84314	TMEM107	0.776938	0.895115	-0.03966
A_23_P118815	332	BIRC5	0.174507	0.472078	-0.229529
A_23_P118834	7153	TOP2A	0.602457	0.796079	0.0835573
A_23_P118842	83895	KRTAP1-5	0.536934	0.757078	0.0542816
A_23_P118854	8688	KRT37	0.820962	0.917726	-0.033572
A_23_P118888	5048	PAFAH1B1	0.17147	0.468872	0.124583
A_23_P118894	79170	PRR15L	0.0552987	0.321545	-0.51671
A_23_P118909	56984	PSMG2	0.14108	0.438401	0.195389
A_23_P118916	80148	PQLC1	0.173752	0.471489	-0.347098
A_23_P118946	9331	B4GALT6	0.901654	0.956699	-0.016736
A_23_P118967	284217	LAMA1	0.455527	0.699957	0.183171
A_23_P119006	NA		0.0911919	0.373886	0.219704
A_23_P119015	5275	SERPINB13	0.386532	0.650754	-0.117626
A_23_P11902	NA		0.11138	0.400265	-0.191705
A_23_P119023	201475	RAB12	0.0974687	0.382534	-0.217585
A_23_P119040	80000	GREB1L	0.456363	0.700624	-0.112354
A_23_P119042	4818	NKG7	0.926429	0.968549	0.017398
A_23_P119084	90233	ZNF551	0.246937	0.53909	0.195826
A_23_P119095	10848	PPP1R13L	0.341564	0.618093	-0.258123
A_23_P119102	7408	VASP	0.344312	0.62041	0.0823164
A_23_P119130	6223	RPS19	0.685515	0.846086	-0.187455
A_23_P119141	9817	KEAP1	0.608029	0.799183	0.0278342
A_23_P119143	7087	ICAM5	0.8578	0.935973	0.030356
A_23_P11915	54834	GDAP2	0.658916	0.828875	-0.0327705
A_23_P119152	NA		0.35623	0.629301	0.15439
A_23_P119168	NA		0.105894	0.393443	0.332899
A_23_P119196	10365	KLF2	0.0676663	0.340715	-0.637542
A_23_P119202	970	CD70	0.857894	0.936008	-0.03957
A_23_P119214	10469	TIMM44	0.335347	0.612733	0.154384
A_23_P11922	NA		0.0219691	0.258711	-0.591734
A_23_P119222	56729	RETN	0.254791	0.545961	0.0842872
A_23_P119254	55723	ASF1B	0.13795	0.435492	0.218948
A_23_P11926	NA		0.208836	0.505956	-0.207104
A_23_P119266	1777	DNASE2	0.367166	0.637916	0.0954888
A_23_P119295	51295	ECSIT	0.188722	0.486276	-0.372683
A_23_P119311	284366	KLK9	0.565567	0.773896	-0.0830612
A_23_P119322	114132	SIGLEC11	0.871446	0.9427	-0.0600526
A_23_P119337	22809	ATF5	0.323044	0.60366	-0.247379
A_23_P119344	8463	TEAD2	0.0723106	0.346366	0.411316
A_23_P119353	54922	RASIP1	0.0880616	0.370095	-0.405805
A_23_P11936	91544	UBXN11	0.632835	0.813409	-0.107017
A_23_P119362	2014	EMP3	0.0144445	0.231157	-0.330971
A_23_P119377	9266	CYTH2	0.983159	0.992272	-0.00292876
A_23_P119390	30846	EHD2	0.0239482	0.263576	-0.134307
A_23_P119395	2696	GIPR	0.322853	0.603594	0.223812
A_23_P119407	NA		0.188201	0.485853	-0.238257
A_23_P119418	8725	C19orf2	0.113146	0.402443	0.207821
A_23_P119448	22870	PPP6R1	0.814237	0.914146	-0.0697615
A_23_P119458	8193	DPF1	0.779657	0.896638	-0.0632201
A_23_P119464	85415	RHPN2	0.892113	0.952288	-0.0232033
A_23_P119478	10148	EBI3	0.92538	0.968002	-0.00995664
A_23_P119500	126282	TNFAIP8L1	0.131205	0.426701	-0.114543
A_23_P119502	8698	S1PR4	0.347067	0.622963	-0.122487
A_23_P119526	8943	AP3D1	0.781219	0.897498	0.0370005
A_23_P119535	1943	EFNA2	0.718905	0.864058	0.0355046
A_23_P119543	10362	HMG20B	0.734299	0.872426	-0.063344
A_23_P119562	1675	CFD	0.0716404	0.345801	-0.410529
A_23_P119573	3780	KCNN1	0.886698	0.949724	0.00633059
A_23_P119583	5143	PDE4C	0.00132652	0.110339	-0.605954
A_23_P119593	79852	EPHX3	0.329804	0.608057	-0.367589
A_23_P119611	53822	FXYD7	0.61953	0.80549	0.0789821
A_23_P119617	57794	SUGP1	0.440735	0.689253	-0.138675
A_23_P119627	51079	NDUFA13	0.211662	0.508119	-0.216461
A_23_P119634	11045	UPK1A	0.174176	0.47199	0.229199
A_23_P119677	3191	HNRNPL	0.0454092	0.306415	-0.38121
A_23_P11968	2980	GUCA2A	0.12856	0.423132	-0.212762
A_23_P119683	54531	MIER2	0.155198	0.452622	-0.377173
A_23_P119698	51293	CD320	0.860771	0.937159	0.0208385
A_23_P119714	29086	BABAM1	0.335423	0.612737	-0.112706
A_23_P119732	22835	ZFP30	0.0058378	0.182803	-0.660637
A_23_P119735	22835	ZFP30	0.706622	0.857678	0.0679086
A_23_P119753	23301	EHBP1	0.128115	0.422873	0.370664
A_23_P119763	64240	ABCG5	0.0920473	0.375012	-0.40338
A_23_P119778	57181	SLC39A10	0.54988	0.765058	0.142391
A_23_P119789	79134	TMEM185B	0.317818	0.599431	0.128248
A_23_P119794	NA		0.0986834	0.384019	-0.45504
A_23_P11980	100509924	LOC100509924	0.209052	0.506145	-0.152245
A_23_P119812	2820	GPD2	0.635289	0.814722	0.096632
A_23_P119835	58484	NLRC4	0.434762	0.684427	0.119335
A_23_P11984	6536	SLC6A9	0.60765	0.799053	0.0675471
A_23_P119850	NA		0.241311	0.534145	0.143283
A_23_P119857	130502	TTC32	0.377114	0.644558	-0.0951255
A_23_P119886	2646	GCKR	0.121485	0.412565	-0.293977
A_23_P119899	2043	EPHA4	0.649565	0.823709	0.0752978
A_23_P1199	11164	NUDT5	0.557811	0.76955	0.0337878
A_23_P119907	55139	ANKZF1	0.573018	0.778551	-0.0307247
A_23_P119916	7475	WNT6	0.204618	0.501634	-0.318103
A_23_P119923	26504	CNNM4	0.976551	0.989707	-0.00277542
A_23_P119936	5068	REG3A	0.156953	0.454165	0.109026
A_23_P119943	3485	IGFBP2	0.0878555	0.369861	-0.366677
A_23_P11995	5052	PRDX1	0.285094	0.572983	0.122084
A_23_P119964	10153	CEBPZ	0.171822	0.469217	-0.188537
A_23_P119992	7444	VRK2	0.0695064	0.342767	-0.0948019
A_23_P120002	3431	SP110	0.510002	0.739417	-0.0841233
A_23_P120048	29994	BAZ2B	0.0964734	0.38132	0.145834
A_23_P120056	6242	RTKN	0.442156	0.690396	-0.188322
A_23_P120062	6936	C2orf3	0.0202516	0.252968	-0.287576
A_23_P12010	51093	RRNAD1	0.945637	0.976695	-0.0101571
A_23_P120103	3790	KCNS3	0.475749	0.715465	-0.120491
A_23_P120125	78989	COLEC11	0.0642692	0.335488	-0.389085
A_23_P120146	9392	TGFBRAP1	0.025344	0.265831	-0.412389
A_23_P120153	284996	RNF149	0.350056	0.625225	-0.0563472
A_23_P120170	200765	TIGD1	0.0908691	0.373225	-0.248033
A_23_P12018	23208	SYT11	0.815411	0.914432	-0.0336856
A_23_P120182	4705	NDUFA10	0.0638789	0.334787	0.237558
A_23_P120194	94101	ORMDL1	0.208421	0.505534	0.130375
A_23_P120227	81606	LBH	0.0821396	0.36109	0.330507
A_23_P120237	56910	STARD7	0.0158694	0.237919	0.490386
A_23_P120243	3231	HOXD1	0.121925	0.412933	-0.244925
A_23_P120254	56940	DUSP22	0.672754	0.837826	-0.0471501
A_23_P120270	90411	MCFD2	0.0527457	0.318311	-0.259883
A_23_P120281	10913	EDAR	0.334759	0.612209	0.263637
A_23_P120316	10797	MTHFD2	0.0128797	0.22694	0.422967
A_23_P120325	3797	KIF3C	0.12826	0.422873	0.144838
A_23_P120335	10651	MTX2	0.327707	0.606728	0.139622
A_23_P120345	57162	PELI1	0.137169	0.434382	0.261086
A_23_P120354	65124	ANKRD57	0.695967	0.851678	-0.0274709
A_23_P120364	79144	PPDPF	0.414921	0.669886	-0.331185
A_23_P120378	NA		0.926394	0.968537	0.0147558
A_23_P120414	7529	YWHAB	0.64977	0.823817	-0.110483
A_23_P120428	27296	TP53TG5	0.689476	0.848191	0.0382299
A_23_P120435	140686	WFDC3	0.319124	0.600409	-0.234307
A_23_P12044	55092	TMEM51	0.238151	0.531518	-0.221094
A_23_P120442	8202	NCOA3	0.854133	0.93425	-0.0375008
A_23_P120458	55905	RNF114	0.49861	0.731964	-0.0552807
A_23_P120467	55734	ZFP64	0.398358	0.658248	-0.0901234
A_23_P120472	7022	TFAP2C	0.0827528	0.361198	0.354591
A_23_P120488	79716	NPEPL1	0.258315	0.548923	-0.173243
A_23_P120504	55321	C20orf46	0.102458	0.388888	-0.336227
A_23_P120513	128653	C20orf141	0.51297	0.741322	-0.127382
A_23_P12053	23013	SPEN	0.357915	0.630917	0.0764621
A_23_P120545	164312	LRRN4	0.251933	0.542881	0.265687
A_23_P120557	55617	TASP1	0.0683635	0.341192	0.208545
A_23_P120566	6238	RRBP1	0.00927252	0.211048	-0.203672
A_23_P120572	54453	RIN2	0.394916	0.6559	-0.171981
A_23_P120588	140880	CST11	0.141265	0.438764	0.214955
A_23_P120594	84532	ACSS1	0.51924	0.745668	-0.136237
A_23_P1206	6229	RPS24	0.353368	0.627539	-0.271999
A_23_P120606	NA		0.031114	0.279051	-0.641012
A_23_P12062	54802	TRIT1	0.426366	0.678795	-0.0997474
A_23_P120629	434	ASIP	0.662232	0.830881	0.0585218
A_23_P120644	NA		0.287139	0.574162	-0.117926
A_23_P120660	6227	RPS21	0.37306	0.641722	-0.495871
A_23_P120667	58494	JAM2	0.148141	0.445268	-0.352364
A_23_P120694	9992	KCNE2	0.810528	0.912055	0.0360743
A_23_P120710	7267	TTC3	0.011939	0.223923	0.370806
A_23_P120744	8888	MCM3AP	0.180134	0.477438	-0.0915602
A_23_P120776	6576	SLC25A1	0.558996	0.770296	-0.0699479
A_23_P120784	27037	TRMT2A	0.644429	0.820397	0.0670908
A_23_P12079	3749	KCNC4	0.533197	0.754844	0.0961163
A_23_P120794	6545	SLC7A4	0.744454	0.877893	-0.0915129
A_23_P120809	2678	GGT1	0.168302	0.466614	-0.262007
A_23_P120812	3543	IGLL1	0.812557	0.913087	0.0351796
A_23_P12082	1117	CHI3L2	0.0456289	0.306807	-0.410804
A_23_P120822	51733	UPB1	0.204658	0.501634	0.206488
A_23_P120839	24144	TFIP11	0.427791	0.67966	0.0575064
A_23_P120845	7494	XBP1	0.502997	0.734327	0.0684948
A_23_P120860	8508	NIPSNAP1	0.994848	0.99833	-0.000674014
A_23_P120863	9514	GAL3ST1	0.0230277	0.261028	-0.575789
A_23_P120883	3162	HMOX1	0.126699	0.420967	-0.27952
A_23_P120899	1439	CSF2RB	0.713925	0.861365	-0.031419
A_23_P120902	3957	LGALS2	0.087961	0.370054	-0.409126
A_23_P120915	129138	ANKRD54	0.167863	0.466365	-0.162233
A_23_P120921	129138	ANKRD54	0.0988595	0.384151	-0.166884
A_23_P120931	27350	APOBEC3C	0.106161	0.393762	0.170897
A_23_P120933	468	ATF4	0.0888088	0.370252	-0.376067
A_23_P120941	468	ATF4	0.247034	0.539155	0.265958
A_23_P120942	2547	XRCC6	0.57371	0.779058	-0.125166
A_23_P120947	2547	XRCC6	0.220068	0.515706	0.200673
A_23_P120953	253190	SERHL2	0.0928567	0.376297	-0.335764
A_23_P120970	25809	TTLL1	0.44025	0.689073	-0.0547606
A_23_P120973	55007	FAM118A	0.0413733	0.298051	-0.183599
A_23_P120982	10343	PKDREJ	0.0487387	0.312034	0.214956
A_23_P121	NA		0.980555	0.991277	-0.0023105
A_23_P121011	64651	CSRNP1	0.155757	0.453013	0.215562
A_23_P121013	51725	FBXO40	0.06631	0.33874	0.355736
A_23_P121030	1370	CPN2	0.649145	0.82338	-0.0575097
A_23_P121037	50512	PODXL2	0.413403	0.668989	-0.326515
A_23_P121051	5096	PCCB	0.688696	0.847779	0.0661489
A_23_P121061	6769	STAC	0.580003	0.782818	-0.0531277
A_23_P121064	5806	PTX3	0.653147	0.825596	-0.051444
A_23_P121082	2632	GBE1	0.856169	0.935504	0.00943041
A_23_P121095	7155	TOP2B	0.0120833	0.223923	0.348871
A_23_P121102	8820	HESX1	0.719774	0.864682	0.0615706
A_23_P121106	8820	HESX1	0.185958	0.483692	0.134282
A_23_P121120	53836	GPR87	0.656058	0.827312	0.0742132
A_23_P121122	80218	NAA50	0.355312	0.628533	0.19323
A_23_P12113	28982	FLVCR1	7.43e-05	0.033327	-0.201308
A_23_P121141	28990	ASTE1	0.724115	0.867229	0.0339825
A_23_P121144	131375	LYZL4	0.401217	0.660406	0.113852
A_23_P121182	26061	HACL1	0.0234138	0.262263	-0.135423
A_23_P121196	79188	TMEM43	0.160749	0.457752	0.176935
A_23_P121215	8536	CAMK1	0.327037	0.606308	0.0694819
A_23_P121222	56852	RAD18	0.265811	0.556261	-0.148444
A_23_P121234	NA		0.93901	0.973796	0.0440589
A_23_P121250	1974	EIF4A2	0.230379	0.524841	0.272094
A_23_P121253	8743	TNFSF10	0.0204764	0.253843	-0.348211
A_23_P121265	11344	TWF2	0.539116	0.758221	-0.0573136
A_23_P121276	6787	NEK4	0.281678	0.570073	0.123896
A_23_P12128	7252	TSHB	0.864826	0.939207	-0.0233044
A_23_P121282	440955	TMEM89	0.344096	0.620187	0.079535
A_23_P121326	11068	CYB561D2	0.453698	0.698653	0.0583271
A_23_P121340	9942	XYLB	0.379617	0.646063	-0.139685
A_23_P121345	55171	TBCCD1	0.0195523	0.251892	0.253115
A_23_P121356	56987	BBX	0.535612	0.756366	-0.0588224
A_23_P121374	54437	SEMA5B	0.212124	0.508623	-0.130192
A_23_P121386	55081	IFT57	0.522743	0.748363	0.0884601
A_23_P121396	131118	DNAJC19	0.584474	0.785788	0.0429753
A_23_P12140	6125	RPL5	0.10242	0.388853	-0.326831
A_23_P121405	29890	RBM15B	0.891736	0.952204	0.0115179
A_23_P121413	165721	DNAJB8	0.965171	0.984991	-0.0053581
A_23_P121423	993	CDC25A	0.313863	0.596643	0.166958
A_23_P121441	22829	NLGN4Y	0.937648	0.973264	0.00905974
A_23_P121447	84517	ARPM1	0.0154076	0.235889	0.408592
A_23_P121459	7066	THPO	0.807326	0.910527	-0.0375487
A_23_P12147	148304	C1orf74	0.128609	0.423226	0.228255
A_23_P121480	4345	CD200	0.330692	0.608797	-0.157961
A_23_P121489	55773	TBC1D23	0.067404	0.340256	-0.425178
A_23_P121499	7466	WFS1	0.699165	0.85369	-0.0637315
A_23_P121506	8603	FAM193A	0.51658	0.743979	0.0729096
A_23_P121527	51088	KLHL5	0.0336703	0.283615	0.262671
A_23_P121533	10417	SPON2	0.101911	0.388022	-0.351351
A_23_P121545	2823	GPM6A	0.563131	0.772535	0.11433
A_23_P12155	54544	CRCT1	0.0610366	0.330237	-0.644756
A_23_P121564	2983	GUCY1B3	0.0596029	0.327963	0.537024
A_23_P121573	NA		0.202624	0.499452	0.196396
A_23_P121586	8916	HERC3	0.216153	0.512657	-0.406936
A_23_P121596	5473	PPBP	0.629666	0.811891	0.0727089
A_23_P121602	8819	SAP30	0.248709	0.540485	0.145677
A_23_P121614	4589	MUC7	0.359008	0.631625	-0.102261
A_23_P121622	27284	SULT1B1	0.822117	0.918342	-0.0540423
A_23_P121637	8492	PRSS12	0.0177236	0.245801	-0.523523
A_23_P121646	10568	SLC34A2	0.471279	0.712663	-0.0630991
A_23_P121657	9957	HS3ST1	0.555177	0.768139	0.0950831
A_23_P121665	57537	SORCS2	0.321074	0.60206	-0.299909
A_23_P121676	80319	CXXC4	0.0925089	0.37583	-0.464049
A_23_P12168	5710	PSMD4	0.583812	0.785318	0.056843
A_23_P121686	9255	AIMP1	0.371258	0.640638	-0.0790837
A_23_P121695	10563	CXCL13	0.206285	0.503224	-0.179182
A_23_P121702	132299	OCIAD2	0.0542995	0.319855	-0.266649
A_23_P121716	306	ANXA3	0.336383	0.613415	0.107003
A_23_P121722	55714	ODZ3	0.0232077	0.261441	-0.531613
A_23_P12173	200186	CRTC2	0.0352843	0.286127	-0.430567
A_23_P121773	2483	FRG1	0.165998	0.463841	-0.249541
A_23_P12178	200186	CRTC2	0.143231	0.440783	-0.401004
A_23_P121783	79644	SRD5A3	0.0882483	0.370095	-0.297998
A_23_P121795	8470	SORBS2	0.227591	0.522231	-0.222558
A_23_P121806	58478	ENOPH1	0.0631388	0.333441	0.31736
A_23_P121813	133121	ENPP6	0.352231	0.626881	-0.120186
A_23_P121825	80006	C5orf44	0.0671403	0.33993	0.17818
A_23_P121851	56121	PCDHB15	0.57511	0.779926	-0.0740404
A_23_P121869	11042	SMA5	0.00405695	0.161741	-0.369737
A_23_P121875	64417	C5orf28	0.585237	0.786119	0.0618788
A_23_P121885	83853	ROPN1L	0.266486	0.556647	-0.144147
A_23_P12189	1676	DFFA	0.0139686	0.230874	-0.215922
A_23_P121898	79668	PARP8	0.0215023	0.256499	0.223827
A_23_P121914	1556	CYP2B7P1	0.787025	0.900486	-0.0294258
A_23_P121926	6414	SEPP1	0.0824507	0.361198	-0.290347
A_23_P121939	79810	PTCD2	0.0368627	0.289831	-0.469762
A_23_P121945	6620	SNCB	0.172361	0.469742	-0.333322
A_23_P121956	54974	THG1L	0.14728	0.444419	-0.112464
A_23_P121971	NA		0.891406	0.952159	0.0127359
A_23_P121976	5459	POU4F3	0.498965	0.732165	0.0769898
A_23_P121987	85480	TSLP	0.180092	0.477401	-0.182016
A_23_P12199	115572	FAM46B	0.330623	0.608746	-0.147586
A_23_P122001	4437	MSH3	0.0485566	0.311866	-0.212901
A_23_P122007	90355	C5orf30	0.03779	0.291772	0.117904
A_23_P122027	11127	KIF3A	0.0235291	0.262545	-0.268199
A_23_P122041	5515	PPP2CA	0.354287	0.628358	0.1779
A_23_P122052	493869	GPX8	0.720853	0.865395	0.0279945
A_23_P122067	114899	C1QTNF3	0.452449	0.697586	-0.0967478
A_23_P122068	114899	C1QTNF3	0.31283	0.595851	-0.0730474
A_23_P122077	51301	GCNT4	0.447012	0.693536	-0.0784068
A_23_P122104	285590	SH3PXD2B	0.132356	0.428505	0.111659
A_23_P122116	51428	DDX41	0.0885667	0.370252	0.164505
A_23_P122127	2533	FYB	0.0159473	0.237933	-0.578231
A_23_P122134	56923	NMUR2	0.0201015	0.252665	0.357245
A_23_P122144	133688	UGT3A1	0.307242	0.591257	0.165529
A_23_P122152	27039	PKD2L2	0.148032	0.445225	0.328212
A_23_P122174	7518	XRCC4	0.513213	0.741532	0.0696788
A_23_P122197	891	CCNB1	0.636041	0.815285	0.0437076
A_23_P122210	NA		0.0800488	0.35818	-0.649126
A_23_P122216	4015	LOX	0.0207416	0.254353	-0.350343
A_23_P122228	4726	NDUFS6	0.514952	0.743056	-0.108115
A_23_P122233	29093	MRPL22	0.349201	0.624638	-0.124319
A_23_P122254	9972	NUP153	0.0439049	0.303968	0.385589
A_23_P122304	3066	HDAC2	0.144074	0.441694	0.245014
A_23_P12231	116983	ACAP3	8.74e-05	0.0369492	-0.553079
A_23_P122375	60685	ZFAND3	0.72359	0.866932	0.0372596
A_23_P122387	55168	MRPS18A	0.19542	0.492634	0.118225
A_23_P122393	65989	DLK2	0.652863	0.825382	0.090702
A_23_P12241	55283	MCOLN3	0.283728	0.571909	0.251127
A_23_P122414	2978	GUCA1A	0.171862	0.469217	-0.236212
A_23_P122439	10385	BTN2A2	0.806379	0.910119	-0.0339747
A_23_P122443	3006	HIST1H1C	0.0557704	0.321828	-0.583034
A_23_P122464	7746	ZNF193	0.109407	0.398003	0.102159
A_23_P122481	NA		0.979524	0.990932	0.00448651
A_23_P122485	NA		0.891089	0.951944	0.0329839
A_23_P122493	11074	TRIM31	0.507182	0.737029	0.0820354
A_23_P122508	135656	DPCR1	0.977517	0.989956	-0.0103155
A_23_P122531	50854	C6orf48	0.222845	0.518424	-0.13818
A_23_P122532	57827	C6orf47	0.0852191	0.365967	-0.385094
A_23_P122545	7936	RDBP	0.0815979	0.360536	-0.22753
A_23_P122563	10471	PFDN6	0.208543	0.505613	-0.178908
A_23_P122579	1616	DAXX	0.395598	0.656234	-0.0812247
A_23_P122582	64771	C6orf106	0.0656251	0.337807	-0.375128
A_23_P122600	389383	C6orf126	0.32943	0.607747	0.0824251
A_23_P122615	25957	PNISR	0.588237	0.788205	-0.0795668
A_23_P122624	84946	LTV1	0.285629	0.573272	0.118079
A_23_P122650	NA		0.687221	0.84703	-0.125123
A_23_P122655	80078	FLJ13744	0.0879773	0.37007	-0.197692
A_23_P122662	54438	GFOD1	0.0109399	0.219403	-0.791072
A_23_P122674	55003	PAK1IP1	0.00558507	0.179881	-0.45159
A_23_P122688	NA		0.506697	0.736843	-0.0826545
A_23_P12272	5511	PPP1R8	0.329199	0.607652	-0.0744618
A_23_P122724	8875	VNN2	0.204898	0.501812	0.287367
A_23_P122775	84816	RTN4IP1	0.0382698	0.292193	-0.377315
A_23_P122782	6950	TCP1	0.0282906	0.272472	0.275164
A_23_P122796	51020	HDDC2	0.420758	0.674716	-0.0386142
A_23_P122805	84928	TMEM209	0.0393994	0.293994	0.253208
A_23_P122815	813	CALU	0.675655	0.839552	0.0628111
A_23_P12282	8444	DYRK3	0.347629	0.623509	-0.129328
A_23_P122852	6604	SMARCD3	0.158581	0.455493	-0.288352
A_23_P122863	2887	GRB10	0.01788	0.246357	-0.589998
A_23_P122876	6878	TAF6	0.501148	0.733155	-0.102634
A_23_P122896	7036	TFR2	0.205626	0.502636	-0.158297
A_23_P122906	26053	AUTS2	0.163743	0.461163	-0.474446
A_23_P122915	25798	BRI3	0.147735	0.444921	-0.393891
A_23_P12292	79098	C1orf116	0.418731	0.672997	-0.270867
A_23_P122924	3624	INHBA	0.558034	0.76978	-0.113322
A_23_P122937	9844	ELMO1	0.121756	0.412768	-0.350076
A_23_P122947	23080	AVL9	0.263282	0.553652	0.0795351
A_23_P122959	9865	TRIL	0.231324	0.52559	0.133726
A_23_P122976	2770	GNAI1	0.201651	0.498423	0.143556
A_23_P123010	9275	BCL7B	0.434364	0.684212	0.148432
A_23_P123015	100505599	LOC100505599	0.0807074	0.35896	-0.267154
A_23_P123018	100505599	LOC100505599	0.00176878	0.121466	-0.532855
A_23_P123022	7532	YWHAG	0.285729	0.573331	-0.161364
A_23_P12303	84871	AGBL4	0.0905843	0.372962	0.484391
A_23_P123039	11097	NUPL2	0.568805	0.77579	0.102362
A_23_P123060	3696	ITGB8	0.388815	0.651963	0.177927
A_23_P123071	858	CAV2	0.782544	0.898094	-0.0520972
A_23_P123086	114796	KIAA1908	0.937652	0.973264	0.0130467
A_23_P123096	2792	GNGT1	0.669403	0.835659	-0.117208
A_23_P123108	10142	AKAP9	0.541969	0.760021	-0.113074
A_23_P123112	5244	ABCB4	0.727932	0.869243	-0.086387
A_23_P123125	83605	CCM2	0.962626	0.984133	0.00664572
A_23_P123133	4967	OGDH	0.268383	0.558326	0.171149
A_23_P123164	89883	OR6W1P	0.446378	0.693203	0.0848678
A_23_P123172	441295	OR2A9P	0.0811887	0.359514	0.167901
A_23_P123193	57180	ACTR3B	0.50455	0.735496	-0.0455213
A_23_P123228	1811	SLC26A3	0.788795	0.90139	-0.0520403
A_23_P123234	NA		0.306175	0.590518	0.305738
A_23_P123242	57786	RBAK	0.887857	0.950276	0.0263237
A_23_P123256	11333	PDAP1	0.00102971	0.101	-0.261133
A_23_P123265	25870	SUMF2	0.994985	0.998341	-0.00114457
A_23_P123276	8323	FZD6	0.932502	0.971306	-0.0166086
A_23_P12329	51107	APH1A	0.480215	0.718622	0.0505519
A_23_P123308	56154	TEX15	0.649762	0.823817	0.0761623
A_23_P123315	NA		0.153405	0.450345	-0.16686
A_23_P123330	6156	RPL30	0.771818	0.892234	-0.0874933
A_23_P123336	54704	PDP1	0.709886	0.859097	0.0846942
A_23_P123343	84955	NUDCD1	0.120954	0.411682	0.218432
A_23_P12336	55170	PRMT6	0.049985	0.31439	0.227296
A_23_P123362	NA		0.318604	0.599872	-0.162738
A_23_P123393	3786	KCNQ3	0.0897108	0.371943	0.204726
A_23_P123402	84675	TRIM55	0.887421	0.950105	0.0146815
A_23_P123413	9760	TOX	0.830118	0.923139	0.0279099
A_23_P123424	1142	CHRNB3	0.886888	0.949804	0.0239278
A_23_P12343	2947	GSTM3	0.265523	0.555841	-0.100773
A_23_P123440	11160	ERLIN2	0.263578	0.553962	-0.090942
A_23_P123448	4325	MMP16	0.00827488	0.203644	0.40173
A_23_P123454	79873	NUDT18	0.0977557	0.38284	-0.466574
A_23_P123463	90459	ERI1	0.727406	0.868988	0.0692519
A_23_P123466	90459	ERI1	0.664983	0.832778	0.0972562
A_23_P123478	5150	PDE7A	0.604498	0.797311	-0.123234
A_23_P123488	63978	PRDM14	0.683374	0.844588	-0.0836157
A_23_P123503	10221	TRIB1	0.602733	0.796315	-0.132351
A_23_P123522	55199	FAM86C1	0.21368	0.509799	0.136584
A_23_P123539	5520	PPP2R2A	0.0932969	0.37679	0.343677
A_23_P123544	54108	CHRAC1	0.571044	0.777292	-0.083335
A_23_P123555	50626	CYHR1	0.143833	0.441291	-0.334362
A_23_P123563	6194	RPS6	0.644781	0.820622	-0.194154
A_23_P12357	23418	CRB1	0.379953	0.646339	0.11689
A_23_P123578	84726	PRRC2B	0.00165822	0.120758	-0.262674
A_23_P123582	64768	IPPK	0.884751	0.948782	-0.0339519
A_23_P123596	2731	GLDC	0.819001	0.916433	0.0326857
A_23_P123608	3717	JAK2	0.97759	0.989956	0.00415519
A_23_P123622	4882	NPR2	0.768461	0.890383	-0.0224297
A_23_P12363	4919	ROR1	0.166969	0.465221	-0.192529
A_23_P123645	7357	UGCG	0.00171766	0.121196	-0.800099
A_23_P123666	55357	TBC1D2	0.942318	0.974967	-0.0122516
A_23_P123672	23424	TDRD7	0.776603	0.89498	0.0287817
A_23_P123692	11094	C9orf7	0.281181	0.569671	-0.330999
A_23_P123704	58483	C9orf27	0.250693	0.541995	-0.198803
A_23_P123714	3933	LCN1	0.686088	0.846396	0.0425025
A_23_P123727	79670	ZCCHC6	0.014288	0.230874	0.285581
A_23_P12373	NA		0.0087399	0.206622	0.407389
A_23_P123732	414328	C9orf103	0.056407	0.322605	-0.431696
A_23_P123763	79886	C9orf82	0.606705	0.79854	0.0936168
A_23_P123794	1056	CEL	0.937951	0.973317	-0.00787075
A_23_P123830	NA		0.780455	0.896949	0.0671674
A_23_P123838	NA		0.8053	0.909586	0.0296911
A_23_P123848	153090	DAB2IP	0.809747	0.911818	0.0337493
A_23_P123853	6363	CCL19	0.599241	0.794509	0.082182
A_23_P12386	NA		0.621157	0.806442	-0.0856444
A_23_P123866	51271	UBAP1	0.575534	0.780214	0.0723682
A_23_P123874	55234	SMU1	0.278401	0.567025	-0.0581111
A_23_P123882	NA		0.0122061	0.223977	-0.346948
A_23_P123905	51010	EXOSC3	0.597888	0.793853	0.079714
A_23_P123916	90678	LRSAM1	0.278951	0.567629	-0.219403
A_23_P12392	5788	PTPRC	0.093031	0.376309	0.57699
A_23_P123943	7046	TGFBR1	0.172852	0.470206	-0.282363
A_23_P123974	1841	DTYMK	0.856903	0.935758	-0.020519
A_23_P123987	202052	DNAJC18	0.539179	0.758236	0.0640236
A_23_P124003	22953	P2RX2	0.866192	0.939773	-0.0129946
A_23_P124022	84246	MED10	0.0487195	0.312034	0.101133
A_23_P124024	84246	MED10	0.36649	0.637294	-0.0903895
A_23_P124035	64928	MRPL14	0.140757	0.43793	-0.187716
A_23_P124044	10522	DEAF1	0.187102	0.484924	-0.306568
A_23_P12405	83715	ESPN	0.201422	0.498239	-0.360268
A_23_P124078	NA		0.209072	0.506145	0.162226
A_23_P124084	4016	LOXL1	0.313638	0.59649	-0.204651
A_23_P124095	51806	CALML5	0.164809	0.462375	-0.251081
A_23_P124108	3684	ITGAM	0.850871	0.932748	0.0769014
A_23_P124122	5827	PXMP2	0.510139	0.739515	-0.0999869
A_23_P124132	79701	C17orf101	0.159743	0.456696	-0.321917
A_23_P124164	57461	ISY1	0.682874	0.844232	-0.0492313
A_23_P124177	NA		0.612636	0.801685	0.103569
A_23_P124190	53840	TRIM34	0.169853	0.467762	-0.17849
A_23_P124202	84289	ING5	0.711119	0.859941	0.0463228
A_23_P124224	1659	DHX8	0.173878	0.471665	-0.221791
A_23_P12423	23400	ATP13A2	0.572313	0.778287	-0.158489
A_23_P124232	117154	DACH2	0.44278	0.690739	-0.128856
A_23_P124252	57118	CAMK1D	0.0122918	0.223993	-0.483052
A_23_P124300	53630	BCMO1	0.657847	0.828373	0.0405669
A_23_P124313	51319	RSRC1	0.000927539	0.0977379	-0.314162
A_23_P124327	64324	NSD1	0.220717	0.516218	-0.241458
A_23_P124335	440712	C1orf186	0.31288	0.595851	-0.130566
A_23_P124343	NA		0.43234	0.682792	-0.147248
A_23_P12435	4660	PPP1R12B	0.588581	0.788289	-0.142296
A_23_P124356	NA		0.23419	0.52781	-0.201146
A_23_P124358	NA		0.238555	0.531708	-0.326491
A_23_P124377	NA		0.0267797	0.269933	0.236493
A_23_P124384	6474	SHOX2	0.00832361	0.203742	-0.656119
A_23_P124402	170572	HTR3C	0.298535	0.583966	0.142833
A_23_P124417	699	BUB1	0.0339662	0.284576	0.20394
A_23_P124427	4750	NEK1	0.569916	0.776736	0.116811
A_23_P124438	255403	ZNF718	0.856651	0.935637	-0.0477515
A_23_P124456	5144	PDE4D	0.00453132	0.168557	0.288924
A_23_P124476	1182	CLCN3	0.0575421	0.324483	0.210602
A_23_P124486	5780	PTPN9	0.0458531	0.30695	0.315359
A_23_P124514	1740	DLG2	0.356176	0.629231	-0.123554
A_23_P124522	79877	DCAKD	0.0138451	0.230874	-0.803979
A_23_P124534	59350	RXFP1	0.974595	0.988731	0.00320786
A_23_P124542	1380	CR2	0.413507	0.669079	-0.0695307
A_23_P124559	83463	MXD3	0.250794	0.54208	-0.213381
A_23_P124570	2241	FER	0.773763	0.893441	-0.0416112
A_23_P124585	81931	ZNF93	0.000948443	0.0981974	-0.714074
A_23_P124619	57402	S100A14	0.0837678	0.362853	-0.289229
A_23_P12463	5768	QSOX1	0.0806156	0.358842	-0.321361
A_23_P124632	3493	IGHA1	0.609687	0.80001	0.0825191
A_23_P124642	10125	RASGRP1	0.819331	0.916602	0.0248506
A_23_P124661	11273	ATXN2L	0.872833	0.94333	-0.0172628
A_23_P124699	NA		0.0569811	0.323923	-0.286044
A_23_P124733	27235	COQ2	0.226598	0.521529	0.176546
A_23_P124742	1119	CHKA	0.0395634	0.294125	0.115918
A_23_P124760	9862	MED24	0.369401	0.639416	-0.191567
A_23_P12477	22955	SCMH1	0.303822	0.589226	0.131756
A_23_P1248	54838	C10orf26	0.707311	0.857854	0.0469819
A_23_P124805	54832	VPS13C	0.124978	0.417951	0.210422
A_23_P124823	NA		0.48292	0.720619	0.0900787
A_23_P124837	4035	LRP1	0.174307	0.472063	-0.270482
A_23_P124855	84186	ZCCHC7	0.00617788	0.186418	0.254058
A_23_P124892	3814	KISS1	0.0723101	0.346366	-0.465647
A_23_P124905	4884	NPTX1	0.137235	0.434489	-0.297261
A_23_P124912	9520	NPEPPS	0.0991045	0.384562	-0.204956
A_23_P124927	10636	RGS14	0.348213	0.623957	-0.105967
A_23_P124934	10320	IKZF1	0.0530268	0.318378	-0.493994
A_23_P124946	202333	CMYA5	0.0676289	0.340688	0.310251
A_23_P124962	23625	FAM89B	0.276513	0.565643	-0.173766
A_23_P124977	NA		0.174262	0.472063	-0.188767
A_23_P124988	23415	KCNH4	0.0593204	0.327825	-0.722223
A_23_P125001	5881	RAC3	0.248614	0.540379	-0.168483
A_23_P125016	NA		0.271165	0.56088	-0.211201
A_23_P12503	55746	NUP133	0.832839	0.924333	0.016044
A_23_P125033	9196	KCNAB3	0.841928	0.928724	-0.0353566
A_23_P125042	7673	ZNF222	0.216495	0.512953	0.108943
A_23_P125056	575	BAI1	0.278881	0.567535	-0.196855
A_23_P125067	2554	GABRA1	0.157773	0.454943	0.329555
A_23_P125078	284129	SLC26A11	0.614468	0.802586	-0.0539492
A_23_P125082	3660	IRF2	0.0461754	0.307536	0.438446
A_23_P125107	3106	HLA-B	0.695573	0.8514	0.0861725
A_23_P125109	NA		0.587692	0.787971	0.120913
A_23_P125117	200942	KLHDC8B	0.281509	0.569997	-0.141077
A_23_P12514	389	RHOC	0.922778	0.966748	0.0108821
A_23_P125147	9364	RAB28	0.504321	0.735318	0.120018
A_23_P125157	84901	NFATC2IP	0.990058	0.995836	0.00165323
A_23_P125164	2272	FHIT	0.0418484	0.299391	-0.501796
A_23_P125171	2272	FHIT	0.0121687	0.223923	-0.321104
A_23_P125176	NA		0.0243541	0.264319	-0.492417
A_23_P125204	219869	OR10G8	0.72436	0.867294	0.0662326
A_23_P125233	1264	CNN1	0.0273736	0.270533	-0.473289
A_23_P125253	9079	LDB2	0.0767556	0.353551	-0.384331
A_23_P12526	7159	TP53BP2	0.0276092	0.270937	0.343505
A_23_P125265	3838	KPNA2	0.124617	0.417222	0.124213
A_23_P125278	6373	CXCL11	0.695376	0.851311	0.075325
A_23_P125286	23538	OR52A1	0.169521	0.46756	-0.115109
A_23_P125303	3547	IGSF1	0.0220214	0.258711	-0.434043
A_23_P12533	91074	ANKRD30A	0.037174	0.290311	-0.516738
A_23_P125348	58485	TRAPPC1	0.30454	0.589636	-0.137809
A_23_P125383	23671	TMEFF2	0.132251	0.428401	-0.343922
A_23_P1254	9446	GSTO1	0.569239	0.776254	-0.055478
A_23_P125408	83475	DOHH	0.146211	0.443305	-0.277372
A_23_P125420	521	ATP5I	0.0534771	0.319202	-0.511529
A_23_P125423	715	C1R	0.420233	0.674436	-0.129134
A_23_P125435	2560	GABRB1	0.201965	0.498827	-0.433073
A_23_P125451	5788	PTPRC	0.00951421	0.212501	-0.509778
A_23_P125475	55879	GABRQ	0.533838	0.755134	-0.106367
A_23_P12549	54518	APBB1IP	0.279322	0.568008	-0.206304
A_23_P125495	1038	CDR1	0.539348	0.758257	-0.0958576
A_23_P125505	5475	PPEF1	0.164312	0.462065	-0.24029
A_23_P125519	6191	RPS4X	0.755269	0.88333	0.0907072
A_23_P125533	89801	PPP1R3F	0.279501	0.568148	0.164981
A_23_P12554	9033	PKD2L1	0.273337	0.562838	-0.120698
A_23_P125541	89801	PPP1R3F	0.538283	0.757887	0.0605959
A_23_P125553	474343	SPIN2B	0.485057	0.722125	-0.0777482
A_23_P125579	58526	MID1IP1	0.84346	0.929498	-0.029904
[truncated: 39,001 more rows]

## Sheet: GSK339
ProbeID	EntrezGeneID	GeneSymbol	pvalue	FDR	Fold Change (log2 signed ratio)
A_23_P100001	400451	FAM174B	0.141301	0.2866	-0.706852
A_23_P100011	10239	AP3S2	0.0125922	0.0583828	0.411666
A_23_P100022	9899	SV2B	0.601516	0.738205	0.458655
A_23_P100056	348093	RBPMS2	0.0406479	0.124435	-0.453913
A_23_P100074	57099	AVEN	0.00976609	0.0495189	-0.694717
A_23_P100092	146050	ZSCAN29	0.00834671	0.0447516	-0.530299
A_23_P100103	23339	VPS39	0.238691	0.406886	-0.169755
A_23_P100111	11261	CHP	0.346675	0.521285	0.122537
A_23_P100127	57082	CASC5	0.0128627	0.0592219	-1.6356
A_23_P100133	23300	ATMIN	0.93698	0.963254	-0.0101321
A_23_P100141	64718	UNKL	0.00217416	0.0190005	-1.4901
A_23_P100156	55654	TMEM127	0.660882	0.783664	-0.0507604
A_23_P100177	4324	MMP15	0.10762	0.23847	-0.551461
A_23_P100189	5619	PRM1	0.525539	0.678799	-0.203332
A_23_P100196	9100	USP10	0.00486143	0.0316861	0.272903
A_23_P100203	3281	HSBP1	0.453338	0.619768	0.108038
A_23_P100220	80004	ESRP2	0.738722	0.838192	0.0709421
A_23_P100240	1014	CDH16	0.719548	0.825008	0.0799942
A_23_P10025	4753	NELL2	0.00143641	0.0146755	-0.818505
A_23_P100263	80790	CMIP	0.709999	0.818086	-0.125783
A_23_P100278	2903	GRIN2A	0.986696	0.991873	0.00338894
A_23_P100292	90850	ZNF598	0.000686563	0.0091245	1.04912
A_23_P100315	26063	DECR2	0.00138583	0.0143737	-1.06134
A_23_P100326	8131	NPRL3	0.00443945	0.0299125	-0.622987
A_23_P100341	23594	ORC6	0.570565	0.714841	-0.0971514
A_23_P100344	23594	ORC6	0.473278	0.63698	0.168965
A_23_P100355	5531	PPP4C	0.154102	0.303393	0.180781
A_23_P100386	146433	IL34	0.0423112	0.127693	-0.447581
A_23_P100392	6923	TCEB2	0.849383	0.910722	-0.0303892
A_23_P100408	4917	NTN3	0.964561	0.979152	-0.00996593
A_23_P100413	118460	EXOSC6	0.654254	0.778602	-0.0853012
A_23_P100420	23174	ZCCHC14	0.88789	0.933336	-0.0229808
A_23_P100441	80011	FAM192A	0.015157	0.0659911	-0.368527
A_23_P100455	64779	MTHFSD	0.0397944	0.122518	-0.893121
A_23_P100469	54957	TXNL4B	0.00228946	0.019596	1.04896
A_23_P100478	84148	KAT8	0.00442565	0.0298588	0.301976
A_23_P100486	79001	VKORC1	0.0272987	0.0961091	-0.314197
A_23_P100499	79641	ROGDI	0.0095985	0.0489381	-0.568504
A_23_P100501	3163	HMOX2	0.108166	0.239279	-0.345917
A_23_P100517	124491	TMEM170A	0.21031	0.374003	-0.181773
A_23_P100522	NA		0.0100666	0.0504933	-1.05889
A_23_P100539	368	ABCC6	0.00789992	0.0432323	-0.645167
A_23_P100556	23265	EXOC7	0.00243813	0.0202889	-0.394936
A_23_P100576	5691	PSMB3	0.71481	0.821346	-0.0575567
A_23_P100583	4025	LPO	0.905655	0.944086	-0.0468034
A_23_P100595	NA		0.0445692	0.132291	-0.985956
A_23_P10060	NA		0.243067	0.411926	0.267292
A_23_P100602	6904	TBCD	0.0030213	0.0233411	-0.494287
A_23_P10062	25834	MGAT4C	0.221591	0.38738	-0.567529
A_23_P100632	51155	HN1	0.0102619	0.0511161	-0.699256
A_23_P100642	5409	PNMT	6.28e-06	0.000380454	-1.87196
A_23_P100654	57659	ZBTB4	0.019438	0.0774048	-0.362376
A_23_P100660	5176	SERPINF1	0.234645	0.402192	-0.240987
A_23_P100676	23293	SMG6	0.0168513	0.07066	-1.30806
A_23_P100693	9931	HELZ	0.0254349	0.0918056	0.564094
A_23_P100704	5598	MAPK7	0.15908	0.310098	-0.297463
A_23_P100711	5376	PMP22	3.36e-05	0.00120289	-0.57652
A_23_P100730	8631	SKAP1	0.687592	0.802342	-0.0831484
A_23_P100754	64750	SMURF2	0.0605748	0.16265	0.520862
A_23_P100764	51629	SLC25A39	0.183245	0.340363	0.230224
A_23_P10077	57104	PNPLA2	0.780649	0.866965	-0.102591
A_23_P100779	7343	UBTF	0.412228	0.582725	0.0817238
A_23_P100788	6777	STAT5B	0.00883867	0.0464299	-0.375044
A_23_P100795	6774	STAT3	0.929957	0.959081	-0.00918401
A_23_P100802	28958	CCDC56	0.000299448	0.00535896	-0.96234
A_23_P10081	200894	ARL13B	0.00446887	0.0300494	0.570557
A_23_P100868	80179	MYO19	0.0438538	0.130764	-0.519123
A_23_P100872	3213	HOXB3	0.797035	0.878071	0.0539418
A_23_P100883	23512	SUZ12	0.00224021	0.0193447	-0.532655
A_23_P10091	NA		0.304181	0.478052	-0.252335
A_23_P100912	28964	GIT1	0.023952	0.0883759	-0.933352
A_23_P100931	23746	AIPL1	0.542899	0.693163	-0.303129
A_23_P100935	23746	AIPL1	0.907527	0.945269	0.0572621
A_23_P100959	124961	ZFP3	0.0935645	0.216989	0.581097
A_23_P100963	201305	SPNS3	0.0634773	0.167551	-0.687807
A_23_P100990	8687	KRT38	0.0912222	0.213282	-0.627572
A_23_P100991	8687	KRT38	0.286445	0.459655	0.369493
A_23_P101007	147111	NOTUM	0.289404	0.462648	-0.245319
A_23_P101013	11322	TMC6	0.000243173	0.00465775	-1.11458
A_23_P101025	654346	LGALS9C	0.0221316	0.0840647	-0.921726
A_23_P101038	83900	KRTAP9-3	0.447579	0.61458	-0.360848
A_23_P101048	83897	KRTAP3-2	0.00865919	0.0458336	-0.731832
A_23_P101054	3885	KRT34	0.0350007	0.112805	-1.27374
A_23_P101073	8387	OR1E1	0.733291	0.834441	0.154372
A_23_P101084	84690	SPATA22	0.657568	0.781185	-0.181781
A_23_P101093	51226	COPZ2	0.000208081	0.00420262	0.848367
A_23_P101111	9150	CTDP1	0.316124	0.490412	-0.235653
A_23_P101121	NA		9.19e-05	0.00241583	-1.16221
A_23_P101131	2922	GRP	0.086786	0.206042	-0.450067
A_23_P101141	54941	RNF125	0.967953	0.981042	0.0120685
A_23_P101185	4677	NARS	0.00230201	0.019639	0.522971
A_23_P101193	4645	MYO5B	0.0182377	0.0742026	-0.317019
A_23_P101208	1528	CYB5A	0.181194	0.337721	-0.356742
A_23_P10121	6422	SFRP1	0.0375389	0.11792	-0.535828
A_23_P101237	83608	C18orf21	0.581959	0.723422	0.101284
A_23_P101240	147645	VSIG10L	0.0782989	0.192139	-0.51844
A_23_P101246	147645	VSIG10L	0.00256012	0.0209511	-0.870863
A_23_P101253	80110	ZNF614	0.107894	0.23882	0.322241
A_23_P101258	80110	ZNF614	0.00257019	0.0209707	0.589346
A_23_P10127	6422	SFRP1	0.000389597	0.00634876	-0.631363
A_23_P101272	55663	ZNF446	0.199416	0.360289	-0.404323
A_23_P101281	84914	ZNF587	0.421586	0.59152	0.238347
A_23_P101297	24139	EML2	0.00214934	0.0188256	-0.86724
A_23_P101303	284352	LRRC68	0.0230019	0.0860591	-0.844183
A_23_P101308	284352	LRRC68	0.0319183	0.106101	-0.887276
A_23_P101319	26974	ZNF285	0.0208376	0.0809853	-0.253998
A_23_P101321	9138	ARHGEF1	0.586878	0.727212	-0.132531
A_23_P101332	65095	KRI1	0.0058173	0.0354344	-0.932784
A_23_P101342	84971	ATG4D	0.16336	0.315159	-0.297992
A_23_P10135	28511	NKIRAS2	0.332708	0.507441	-0.181895
A_23_P101351	79088	ZNF426	0.167385	0.320017	-0.164416
A_23_P101374	29785	CYP2S1	0.00260147	0.0211386	-1.12025
A_23_P101380	374907	B3GNT8	0.034092	0.110978	-1.08432
A_23_P101392	79041	TMEM38A	0.00212425	0.0186978	-0.850422
A_23_P1014	84791	C1orf97	0.000137038	0.00316391	-0.753494
A_23_P101407	718	C3	1.75e-05	0.000788875	-1.31488
A_23_P101427	115704	EVI5L	0.52529	0.678584	-0.149498
A_23_P101434	91662	NLRP12	0.132951	0.275456	-0.395271
A_23_P101461	81576	CCDC130	0.000739963	0.00960382	-0.622045
A_23_P101476	79973	ZNF442	0.0648872	0.169847	0.788191
A_23_P101480	22983	MAST1	0.000598037	0.00838112	-1.55317
A_23_P101505	11012	KLK11	0.284266	0.457378	-0.331829
A_23_P101516	3748	KCNC3	0.170824	0.324474	-0.375752
A_23_P101521	126123	IZUMO2	0.140841	0.28595	-0.308037
A_23_P101532	6205	RPS11	0.104813	0.234213	-0.594621
A_23_P101551	587	BCAT2	0.0283131	0.0984331	-0.436593
A_23_P10156	79643	CHMP6	0.0288964	0.0995507	-0.798925
A_23_P101564	26291	FGF21	0.234553	0.402102	0.378738
A_23_P101573	171169	SPACA4	0.641953	0.76966	-0.130299
A_23_P101615	147929	ZNF565	0.000824373	0.0102702	0.711745
A_23_P101623	63934	ZNF667	0.63579	0.764799	0.0841744
A_23_P101636	3812	KIR3DL2	0.483662	0.645269	-0.257403
A_23_P101642	5794	PTPRH	0.228243	0.395143	-0.373333
A_23_P101655	81	ACTN4	0.0145237	0.0640156	-0.703066
A_23_P101671	85300	ATCAY	0.0658459	0.171513	0.440351
A_23_P101683	1178	CLC	0.606472	0.74205	0.165941
A_23_P101699	84717	HDGFRP2	1.64e-05	0.000750968	-0.849036
A_23_P101707	10226	PLIN3	0.0989627	0.225202	-0.232895
A_23_P10172	29122	PRSS50	0.394397	0.566809	-0.35494
A_23_P101737	84444	DOT1L	0.230787	0.398026	-0.42415
A_23_P101742	116541	MRPL54	0.754298	0.848456	-0.0480386
A_23_P101759	2527	FUT5	0.103106	0.231761	0.364849
A_23_P101761	84634	KISS1R	0.181291	0.337814	-0.592439
A_23_P101774	6528	SLC5A5	0.756922	0.850498	-0.0553906
A_23_P101783	3594	IL12RB1	0.618178	0.751304	0.120067
A_23_P101796	85360	SYDE1	0.144261	0.290564	-0.432158
A_23_P101806	3249	HPN	0.718168	0.823979	-0.14204
A_23_P101811	7561	ZNF14	0.00476295	0.03126	0.409983
A_23_P10182	8309	ACOX2	0.151176	0.299597	-0.601878
A_23_P101829	9170	LPAR2	0.000243939	0.00466489	-0.698241
A_23_P101871	115290	FBXO17	2.2e-06	0.000190415	-0.622132
A_23_P101893	84467	FBN3	0.00536364	0.0336613	-0.575868
A_23_P101905	10297	APC2	0.00143207	0.0146472	-1.79263
A_23_P101908	10297	APC2	0.00224529	0.0193763	-1.43307
A_23_P10194	26470	SEZ6L2	0.0757834	0.188265	-0.545548
A_23_P101943	26225	ARL5A	0.00747232	0.0417593	0.84193
A_23_P101950	4190	MDH1	0.0204526	0.0800713	0.602376
A_23_P101960	678	ZFP36L2	0.00680896	0.0392972	-1.18064
A_23_P101972	92291	CAPN13	0.0619611	0.164983	-0.487485
A_23_P101992	8685	MARCO	0.217626	0.382488	-0.226698
A_23_P102000	7852	CXCR4	0.00767494	0.0424316	-0.774155
A_23_P102017	57471	ERMN	0.439066	0.606972	-0.279869
A_23_P102037	80219	COQ10B	7.87e-05	0.00220475	1.25435
A_23_P102058	4148	MATN3	0.58836	0.728351	-0.149965
A_23_P10206	3037	HAS2	0.0038195	0.0271027	0.89849
A_23_P102060	6744	SSFA2	0.305317	0.479267	-0.298334
A_23_P102071	NA		0.284661	0.457743	0.189057
A_23_P102083	66037	BOLL	0.00474461	0.0312296	-0.752494
A_23_P102109	7277	TUBA4A	0.0222184	0.0842452	-0.796449
A_23_P10211	114134	SLC2A13	0.193447	0.353162	-0.269654
A_23_P102113	80326	WNT10A	0.00646766	0.0379579	-1.18013
A_23_P102117	80326	WNT10A	0.00561126	0.0346635	-0.916501
A_23_P102122	10109	ARPC2	0.312471	0.486528	-0.207811
A_23_P102160	151393	FAM82A1	0.00386874	0.0273027	0.307844
A_23_P102172	130749	CPO	0.649565	0.775183	-0.195905
A_23_P102183	NA		0.00447873	0.0300832	1.14806
A_23_P102192	9448	MAP4K4	0.567714	0.712663	-0.168075
A_23_P102202	2956	MSH6	9.55e-05	0.00248856	-0.443278
A_23_P102235	6637	SNRPG	0.434546	0.602923	0.25074
A_23_P102242	64844	2007-03-01	0.257306	0.427661	0.231923
A_23_P102258	116540	MRPL53	0.00407604	0.0283117	-0.290136
A_23_P102262	9801	MRPL19	0.930326	0.959254	0.0166849
A_23_P102278	57628	DPP10	0.751285	0.84639	0.119913
A_23_P102286	3973	LHCGR	0.00256717	0.0209586	-0.822302
A_23_P10232	55024	BANK1	0.00154356	0.0152902	-1.17845
A_23_P102320	129401	NUP35	0.00025816	0.00486528	0.633138
A_23_P102331	6332	SCN7A	0.105998	0.235825	0.490766
A_23_P102351	9486	CHST10	1.4e-06	0.000140343	-0.559708
A_23_P102364	25791	NGEF	0.203431	0.365338	-0.210726
A_23_P102391	30061	SLC40A1	8.46e-05	0.00230225	-0.70947
A_23_P102404	10574	CCT7	0.253749	0.423864	-0.226776
A_23_P102412	65977	PLEKHA3	0.012553	0.0582658	0.461464
A_23_P102420	10575	CCT4	0.150949	0.299313	-0.340931
A_23_P102439	431705	ASTL	0.0758963	0.188499	-0.233122
A_23_P102454	51141	INSIG2	0.000874478	0.010658	1.01081
A_23_P102462	129804	FBLN7	0.00191869	0.0175399	-0.704914
A_23_P102471	4436	MSH2	0.0704185	0.179349	-0.3382
A_23_P102481	1493	CTLA4	0.487523	0.648386	-0.331116
A_23_P102494	54978	C2orf18	0.643731	0.770729	-0.120408
A_23_P102508	8884	SLC5A6	0.00672519	0.0389618	-0.457808
A_23_P102517	5147	PDE6D	0.0374923	0.117837	-0.419084
A_23_P102523	6711	SPTBN1	0.16396	0.315886	-0.361427
A_23_P102542	54812	AFTPH	7.9e-05	0.00220809	0.530831
A_23_P102551	7851	MALL	0.581953	0.723422	0.1596
A_23_P102571	56731	SLC2A4RG	0.000558521	0.00802923	-1.73467
A_23_P102575	56731	SLC2A4RG	7.53e-06	0.000430662	-1.27036
A_23_P102582	55969	C20orf24	3.04e-05	0.00112755	0.500727
A_23_P102607	84181	CHD6	0.0188495	0.0757231	0.317202
A_23_P102611	8839	WISP2	0.137234	0.281106	-0.30618
A_23_P102622	8785	MATN4	0.0279998	0.0976693	-1.24405
A_23_P102634	140870	WFDC6	0.195685	0.355855	1.03858
A_23_P102681	79160	MGC4294	0.0193066	0.0771048	-0.804707
A_23_P102694	140881	DEFB129	0.370213	0.543787	-0.324054
A_23_P102706	9751	SNPH	0.040823	0.124769	-1.25034
A_23_P102731	54498	SMOX	0.203566	0.36549	-0.311541
A_23_P102743	51605	TRMT6	0.000412422	0.00659747	0.569561
A_23_P102759	22903	BTBD3	0.934098	0.961459	-0.0169582
A_23_P102769	92667	C20orf72	0.0297985	0.101529	0.345182
A_23_P102770	51126	NAA20	0.00280291	0.0221889	0.842623
A_23_P102816	NA		0.145115	0.291768	-0.252868
A_23_P102832	11190	CEP250	0.00557873	0.0345458	-1.18786
A_23_P102842	9054	NFS1	0.000306842	0.00545306	-0.351947
A_23_P102864	5651	TMPRSS15	0.164961	0.316985	-0.565277
A_23_P102876	10694	CCT8	0.0332572	0.109116	0.292438
A_23_P102884	8867	SYNJ1	0.00021389	0.00427621	0.553225
A_23_P102890	64968	MRPS6	6.5e-06	0.000391055	-0.826264
A_23_P1029	4237	MFAP2	9.65e-07	0.000109183	-0.867974
A_23_P10291	1510	CTSE	0.742261	0.840357	-0.047816
A_23_P102917	10317	B3GALT5	0.30591	0.479924	-0.229485
A_23_P102919	10317	B3GALT5	0.0917418	0.214094	0.569931
A_23_P102925	5822	PWP2	0.060177	0.162021	-0.470855
A_23_P102937	6612	SUMO3	0.903209	0.942711	0.0319138
A_23_P102950	89765	RSPH1	0.386535	0.559306	0.222294
A_23_P102965	23786	BCL2L13	0.882674	0.93011	-0.022859
A_23_P102973	8220	DGCR14	0.368084	0.541532	-0.241579
A_23_P102988	10587	TXNRD2	0.0696196	0.177966	-0.334959
A_23_P102994	5297	PI4KA	0.145454	0.29222	-0.188941
A_23_P103011	9609	RAB36	0.348493	0.523225	-0.288398
A_23_P103034	1413	CRYBA4	0.447219	0.614374	0.245986
A_23_P103041	10634	GAS2L1	0.0882502	0.208449	-0.372379
A_23_P10305	56474	CTPS2	0.316844	0.491212	-0.186321
A_23_P103062	91445	RNF185	9.57e-06	0.00051582	0.456067
A_23_P103070	7533	YWHAH	0.291624	0.46494	-0.19062
A_23_P103084	10043	TOM1	1.63e-06	0.000155659	0.827207
A_23_P103099	23543	RBFOX2	0.282017	0.454795	0.160676
A_23_P103104	4242	MFNG	0.00385651	0.0272638	-1.19273
A_23_P103110	23764	MAFF	0.0629891	0.166821	0.353491
A_23_P103120	9567	GTPBP1	0.0145905	0.0642263	-0.486105
A_23_P103131	54471	SMCR7L	0.00235211	0.0198981	0.3442
A_23_P103149	50	ACO2	0.0492214	0.141253	-0.268705
A_23_P103172	127253	TYW3	0.31849	0.492967	0.122561
A_23_P103180	127253	TYW3	0.963478	0.978599	0.00955328
A_23_P103201	55629	PNRC2	0.726736	0.830245	0.0601818
A_23_P103226	2166	FAAH	0.0129443	0.0595243	-1.01147
A_23_P103232	54935	DUSP23	0.0141604	0.0629259	-0.395277
A_23_P103248	93183	PIGM	3.51e-06	0.000259433	0.447585
A_23_P103256	10878	CFHR3	0.483072	0.644777	-0.259684
A_23_P103269	NA		0.320698	0.495259	0.262492
A_23_P103276	112970	KTI12	0.00850431	0.0452885	0.636865
A_23_P103282	9528	TMEM59	0.832886	0.901028	0.0442277
A_23_P103310	6278	S100A7	0.0368382	0.116496	-0.601331
A_23_P103315	353131	LCE1A	0.0579325	0.157844	-0.827676
A_23_P103328	5733	PTGER3	0.304921	0.478958	0.474615
A_23_P103334	149041	RC3H1	0.0279127	0.097497	-1.14363
A_23_P103349	10896	OCLM	0.120113	0.257214	-0.583101
A_23_P103361	3932	LCK	8.49e-07	9.96e-05	-0.82933
A_23_P103371	113451	ADC	0.0257217	0.0924966	-0.411128
A_23_P103398	5664	PSEN2	0.0022833	0.0195602	-0.756531
A_23_P103405	NA		0.0193875	0.0772813	-0.5702
A_23_P103414	51441	YTHDF2	0.000101827	0.00258648	-0.830038
A_23_P103424	85397	RGS8	0.455699	0.621767	0.283511
A_23_P103433	127700	OSCP1	0.0348926	0.112566	-0.595077
A_23_P103442	64769	MEAF6	0.0115531	0.0552716	-0.404317
A_23_P103454	84224	NBPF3	0.811987	0.887606	-0.0487772
A_23_P103465	5322	PLA2G5	0.47732	0.640111	-0.154722
A_23_P103476	29914	UBIAD1	0.000771314	0.00986089	0.73334
A_23_P103486	1573	CYP2J2	5.18e-05	0.00163977	-0.811968
A_23_P103496	115361	GBP4	0.000177297	0.00375862	-1.1941
A_23_P103503	4194	MDM4	0.00055351	0.00797957	-0.348456
A_23_P103511	400793	C1orf226	0.0305342	0.103088	-0.800751
A_23_P103522	6402	SELL	0.679772	0.797102	-0.130472
A_23_P103532	23432	GPR161	0.0347114	0.112211	-0.481813
A_23_P10356	10863	ADAM28	0.000428303	0.0067333	-1.05989
A_23_P103561	89796	NAV1	0.0225704	0.0850858	-1.23608
A_23_P103571	10905	MAN1A2	0.000856344	0.0105246	-0.452316
A_23_P103588	3158	HMGCS2	0.772245	0.861295	-0.0628136
A_23_P103601	57134	MAN1C1	0.924476	0.955687	-0.0158981
A_23_P103617	8416	ANXA9	2.77e-06	0.000222162	-1.86274
A_23_P103628	55127	HEATR1	0.62783	0.758539	0.0592772
A_23_P103631	10969	EBNA1BP2	0.00089283	0.0108079	1.06578
A_23_P103661	55249	YY1AP1	0.0589573	0.159676	-0.358642
A_23_P103672	10763	NES	0.0147525	0.0647246	-0.657465
A_23_P103690	10712	FAM189B	0.00443057	0.0298674	-0.890876
A_23_P103698	28956	LAMTOR2	3.01e-05	0.0011207	-0.856702
A_23_P103703	27129	HSPB7	0.155136	0.304641	-0.34137
A_23_P103720	79814	AGMAT	0.000251379	0.00477375	0.666088
A_23_P10374	22864	R3HDM2	0.000656183	0.00885275	-0.596284
A_23_P103743	NA		0.18282	0.339829	0.207108
A_23_P103756	5016	OVGP1	0.126739	0.266887	-0.475192
A_23_P103765	2205	FCER1A	0.0638342	0.168157	-0.612008
A_23_P103775	84230	LRRC8C	0.0296492	0.101187	0.54316
A_23_P103787	204851	HIPK1	0.501482	0.659167	-0.226173
A_23_P103795	81839	VANGL1	6.21e-06	0.000377548	-0.748605
A_23_P1038	10765	KDM5B	0.01737	0.0719727	-0.630055
A_23_P103803	115352	FCRL3	0.451048	0.617854	0.233584
A_23_P103812	339479	FAM5C	0.615124	0.749013	-0.209844
A_23_P103824	5298	PI4KB	0.487696	0.648467	-0.159965
A_23_P103837	9898	UBAP2L	0.104989	0.234503	0.228898
A_23_P10385	51514	DTL	0.0001034	0.00260887	-0.894513
A_23_P103864	79573	TTC13	0.22825	0.395143	-0.197923
A_23_P103877	126755	LRRC38	0.16319	0.314923	-0.374997
A_23_P103885	54998	AURKAIP1	0.162494	0.314038	0.319519
A_23_P103897	100505741	SPATA1	0.936004	0.962562	0.0159814
A_23_P103905	51506	UFC1	0.141317	0.286619	-0.230967
A_23_P10391	1290	COL5A2	5.61e-07	7.52e-05	-1.61117
A_23_P103919	8703	B4GALT3	0.381541	0.554585	0.138016
A_23_P103923	9917	FAM20B	0.657291	0.78096	-0.0427721
A_23_P103932	2268	FGR	0.0807187	0.19607	-0.43927
A_23_P103942	55735	DNAJC11	0.0753648	0.187566	-0.750516
A_23_P103951	NA		0.990716	0.994379	-0.00233266
A_23_P103968	22977	AKR7A3	0.00507558	0.0326123	-0.446734
A_23_P103971	199974	CYP4Z1	0.0639379	0.168312	-0.378001
A_23_P103981	723790	HIST2H2AA4	0.00443902	0.0299125	-1.41155
A_23_P103996	2730	GCLM	0.0893078	0.210223	0.367766
A_23_P10401	5523	PPP2R3A	0.896398	0.938709	-0.0158058
A_23_P104012	NA		0.0674167	0.174247	0.94744
A_23_P104022	116461	TSEN15	0.00253386	0.0208125	0.423949
A_23_P104025	116461	TSEN15	0.0344601	0.11168	0.36456
A_23_P104046	10380	BPNT1	0.00781634	0.0429584	-0.478447
A_23_P104054	51430	C1orf9	0.000681243	0.00908028	0.679813
A_23_P104065	23463	ICMT	0.0869013	0.206189	-0.205241
A_23_P104073	6274	S100A3	0.000570935	0.00812225	-1.00679
A_23_P104086	9696	CROCC	0.0506906	0.143957	-0.664193
A_23_P104098	127833	SYT2	0.753481	0.847816	-0.0775176
A_23_P104109	26750	RPS6KC1	3.01e-09	1.9e-06	1.24906
A_23_P104116	9939	RBM8A	0.65431	0.778636	-0.0751325
A_23_P104138	339500	ZNF678	0.652098	0.776993	-0.0625631
A_23_P104146	9202	ZMYM4	0.795619	0.877127	0.0290775
A_23_P104151	51249	TMEM69	0.338461	0.512933	0.174578
A_23_P104188	1999	ELF3	3.42e-05	0.00121746	-1.04587
A_23_P104193	3688	ITGB1	0.319709	0.494182	-0.252061
A_23_P104199	3688	ITGB1	0.68609	0.801347	-0.0787653
A_23_P104201	10730	YME1L1	1.3e-05	0.0006376	1.05479
A_23_P104224	29974	A1CF	0.175632	0.330818	-0.364099
A_23_P104237	57678	GPAM	0.00621124	0.0369985	0.551509
A_23_P104252	80760	ITIH5	0.00105175	0.0120217	-0.809274
A_23_P104275	387700	SLC16A12	0.981898	0.989107	0.00368254
A_23_P104282	55719	FAM178A	0.163067	0.314787	-0.19318
A_23_P104295	6468	FBXW4	0.00178758	0.0167522	-0.751659
A_23_P1043	55765	C1orf106	0.00125757	0.0134868	-0.746196
A_23_P104318	54541	DDIT4	0.233569	0.401052	-0.257171
A_23_P104323	4255	MGMT	0.000245294	0.0046777	-0.935981
A_23_P104335	220965	FAM13C	0.497038	0.65568	0.289873
A_23_P104346	5305	PIP4K2A	0.014597	0.0642418	-0.699758
A_23_P104351	404636	FAM45A	0.0142254	0.0631214	-0.569407
A_23_P104362	1892	ECHS1	0.231395	0.398602	-0.149533
A_23_P104372	23234	DNAJC9	0.000678241	0.00905794	0.256995
A_23_P104387	27069	GHITM	0.0616352	0.164454	0.440354
A_23_P104413	22947	DUX4	0.0476905	0.13839	-0.637624
A_23_P10442	114876	OSBPL1A	9.56e-05	0.00248856	-0.777794
A_23_P104438	84665	MYPN	0.01217	0.0571833	-0.4446
A_23_P104445	118788	PIK3AP1	0.0700535	0.178719	-0.830219
A_23_P104451	79009	DDX50	2.48e-11	9.03e-08	0.69855
A_23_P104464	240	ALOX5	0.50044	0.658326	-0.17382
A_23_P104471	51207	DUSP13	0.0981677	0.224115	-0.410037
A_23_P104484	338557	O3FAR1	0.0106468	0.0524219	0.436361
A_23_P104493	9060	PAPSS2	0.0052018	0.0330971	1.53732
A_23_P104509	9679	FAM53B	0.19374	0.353461	-0.267847
A_23_P104522	10529	NEBL	0.00153443	0.0152476	-1.00215
A_23_P104555	26287	ANKRD2	0.00452189	0.0303085	-0.661485
A_23_P104563	1374	CPT1A	0.0479119	0.138818	-0.497778
A_23_P104579	10263	CDK2AP2	0.0791483	0.193574	0.517716
A_23_P10458	55267	C22orf26	0.377247	0.550628	-0.60745
A_23_P104583	57175	CORO1B	0.109748	0.241685	-0.352
A_23_P104594	6343	SCT	0.137242	0.281106	-0.39731
A_23_P104607	5702	PSMC3	0.522339	0.676205	-0.0666186
A_23_P104617	120071	GYLTL1B	0.193762	0.353485	-0.328408
A_23_P104624	23052	ENDOD1	0.00036829	0.00614316	-0.679716
A_23_P10463	4725	NDUFS5	0.0666	0.172812	-0.611171
A_23_P104641	738	C11orf2	0.181299	0.337814	-0.509103
A_23_P104651	113130	CDCA5	0.889423	0.934149	-0.0258147
A_23_P104676	10291	SF3A1	0.818023	0.89178	-0.0327405
A_23_P104689	5970	RELA	0.00531403	0.0334832	0.208241
A_23_P104692	246330	PELI3	0.0249873	0.090774	-1.31887
A_23_P104705	3177	SLC29A2	0.00461716	0.0307307	-0.437369
A_23_P104734	3703	STT3A	6.18e-06	0.00037733	0.71882
A_23_P104741	84623	KIRREL3	0.014921	0.0652475	-0.89379
A_23_P104762	10413	YAP1	8.3e-05	0.00227862	-0.496609
A_23_P104798	3606	IL18	0.0121703	0.0571833	-0.490618
A_23_P104804	7704	ZBTB16	0.00280773	0.0222019	0.738859
A_23_P104819	11181	TREH	0.873948	0.92553	0.0630175
A_23_P104845	1132	CHRM4	0.154465	0.303788	-0.374174
A_23_P104853	7007	TECTA	0.464277	0.62933	-0.248213
A_23_P104865	NA		0.578653	0.720896	0.15011
A_23_P104876	53340	SPA17	0.000137985	0.0031783	-0.626997
A_23_P10488	NA		0.0010423	0.0119537	1.00763
A_23_P104881	54538	ROBO4	0.230981	0.398226	-0.306578
A_23_P104892	1982	EIF4G2	0.760415	0.853043	0.0671014
A_23_P104942	51075	TMX2	1.72e-09	1.24e-06	0.801078
A_23_P10497	374868	ATP9B	0.0443794	0.131909	0.197145
A_23_P104972	64232	MS4A5	0.698006	0.809935	0.123731
A_23_P104996	7439	BEST1	0.19459	0.354443	-0.392957
A_23_P10500	374868	ATP9B	0.0320312	0.10639	0.324468
A_23_P105002	6094	ROM1	0.065331	0.170633	-0.616394
A_23_P105012	54979	HRASLS2	0.00164226	0.0158678	-1.86408
A_23_P105028	25923	ATL3	0.200432	0.361664	0.20471
A_23_P105044	6150	MRPL23	0.0117154	0.055818	-0.607795
A_23_P10506	27306	HPGDS	0.636892	0.765562	0.206423
A_23_P105066	3611	ILK	0.068866	0.176745	0.436554
A_23_P105088	430	ASCL2	0.502488	0.659834	0.157141
A_23_P105118	79324	OR51G1	0.299172	0.472571	0.251448
A_23_P105138	847	CAT	0.0540695	0.150622	-0.352433
A_23_P105144	57758	SCUBE2	0.000544372	0.00790902	-0.889924
A_23_P10518	51270	TFDP3	0.32041	0.494944	0.247269
A_23_P105184	116985	ARAP1	0.100187	0.227026	-0.572603
A_23_P105197	726	CAPN5	0.323019	0.497381	-0.242002
A_23_P105212	7069	THRSP	0.0256879	0.0924585	-0.397359
A_23_P105227	10873	ME3	0.269806	0.441248	0.209628
A_23_P10525	NA		0.867965	0.922088	0.0491222
A_23_P105251	2735	GLI1	0.128645	0.269627	-0.265945
A_23_P105264	2120	ETV6	0.0137355	0.0617	-1.12183
A_23_P105276	7637	ZNF84	0.296038	0.469338	-0.1661
A_23_P105307	1606	DGKA	0.0534633	0.149461	-0.345072
A_23_P105313	1967	EIF2B1	0.0432837	0.129677	0.595951
A_23_P105368	NA		0.112413	0.245745	0.305369
A_23_P105382	83591	THAP2	0.492381	0.652329	-0.104606
A_23_P105392	10576	CCT2	0.416425	0.586937	0.106144
A_23_P105409	7786	MAP3K12	0.00169911	0.0161857	-0.666608
A_23_P10542	94031	HTRA3	0.708071	0.816615	-0.08603
A_23_P105423	9840	KIAA0748	0.267964	0.439602	-0.366285
A_23_P105436	5781	PTPN11	0.14328	0.2893	0.270469
A_23_P105442	160622	GRASP	0.10019	0.227026	-0.530917
A_23_P105453	319101	KRT73	0.411418	0.582001	0.580263
A_23_P105461	1240	CMKLR1	0.116733	0.252184	-0.287565
A_23_P105465	1240	CMKLR1	0.263225	0.43419	0.27334
A_23_P105475	28234	SLCO1B3	0.00117531	0.0128878	0.662906
A_23_P105495	50840	TAS2R14	0.012949	0.0595322	0.413717
A_23_P105519	51729	WBP11	0.265764	0.437112	0.136593
A_23_P105524	89869	PLCZ1	0.379974	0.553112	0.160746
A_23_P105535	282809	POC1B	0.203628	0.365505	0.243041
A_23_P105545	6843	VAMP1	0.728966	0.831621	-0.0609331
A_23_P105562	7450	VWF	0.711716	0.819281	-0.0631609
A_23_P105571	56994	CHPT1	0.0426603	0.128429	0.313645
A_23_P105583	83695	C12orf32	0.0331516	0.108877	-0.386257
A_23_P10559	9625	AATK	0.0486117	0.14015	-0.605376
A_23_P105592	4598	MVK	0.00476898	0.0312909	-0.837071
A_23_P1056	51463	GPR89B	0.0387437	0.120468	0.397461
A_23_P10561	NA		0.612266	0.746932	0.329627
A_23_P105619	89894	TMEM116	0.0958593	0.220546	-0.317318
A_23_P105625	84274	COQ5	0.0788759	0.193127	-0.245621
A_23_P10564	NA		0.154391	0.303687	-0.553024
A_23_P105646	466	ATF1	0.0431211	0.129351	0.240449
A_23_P105651	29951	PDZRN4	0.950408	0.971012	0.0314508
A_23_P105664	29080	CCDC59	0.000942806	0.0112149	0.63819
A_23_P105691	55507	GPRC5D	0.0286719	0.0990603	-1.48984
A_23_P105705	2251	FGF6	0.4465	0.613694	-0.495124
A_23_P105730	56890	MDM1	0.674803	0.793362	0.0586505
A_23_P105732	NA		0.0333213	0.109259	-0.949318
A_23_P105747	55198	APPL2	0.00550248	0.0342287	0.496613
A_23_P105753	11137	PWP1	0.0153376	0.0664176	0.70966
A_23_P105794	94240	EPSTI1	0.0217395	0.0832231	-0.553479
A_23_P105803	2254	FGF9	0.104388	0.233568	-0.501418
A_23_P105815	NA		0.00280432	0.0221914	-1.24432
A_23_P105833	54841	BIVM	0.0944616	0.218378	-0.303416
A_23_P105856	283537	SLC46A3	0.0565087	0.155223	0.527295
A_23_P105862	10129	FRY	0.000126203	0.00300308	-0.577509
A_23_P105873	7223	TRPC4	0.822734	0.89456	-0.0901569
A_23_P105886	387911	C1QTNF9B	0.0664964	0.172631	-0.340913
A_23_P105900	690	BTF3P11	0.0300891	0.102177	0.462048
A_23_P10591	284207	METRNL	0.459286	0.625004	-0.132273
A_23_P105923	1735	DIO3	0.0494568	0.141661	-0.399955
A_23_P105939	91828	EXOC3L4	0.00872678	0.0460732	-0.896076
A_23_P105957	87	ACTN1	0.125102	0.264487	-0.362038
A_23_P105963	122481	AK7	0.0197175	0.0781858	-0.521706
A_23_P105973	256394	SERPINA11	0.110763	0.24328	-0.458444
A_23_P106	23032	USP33	0.722369	0.826763	-0.0652747
A_23_P106002	4792	NFKBIA	0.0053406	0.033588	-0.704698
A_23_P106016	5587	PRKD1	0.142624	0.288455	-0.668627
A_23_P106024	3714	JAG2	0.00342211	0.0252668	-1.0824
A_23_P106042	116173	CMTM5	0.604316	0.740495	0.206908
A_23_P10605	NA		0.586211	0.726694	-0.0876345
A_23_P106056	1603	DAD1	0.00689735	0.0396122	0.6921
A_23_P106069	NA		0.146043	0.293114	-0.498676
A_23_P106080	84659	RNASE7	0.0479284	0.138844	0.452999
A_23_P106103	9495	AKAP5	0.355264	0.530115	-0.156349
A_23_P106117	4990	SIX6	0.00133471	0.0139921	1.02579
A_23_P106127	9786	KIAA0586	0.0122769	0.0574799	-0.550348
A_23_P106131	3895	KTN1	0.619019	0.751965	-0.0837713
A_23_P10614	5163	PDK1	0.0237827	0.0880282	0.814406
A_23_P106145	30001	ERO1L	0.598797	0.736395	-0.1361
A_23_P106158	79944	L2HGDH	0.415647	0.586102	-0.115082
A_23_P106162	55320	MIS18BP1	0.317569	0.491997	-0.253641
A_23_P106174	5663	PSEN1	0.785122	0.870001	0.0595144
A_23_P106194	2353	FOS	0.265406	0.436819	0.126178
A_23_P106204	2954	GSTZ1	0.00283723	0.0223742	-0.591331
A_23_P106226	29082	CHMP4A	7.46e-05	0.00212433	-0.862861
A_23_P106236	29018	PRO1768	0.412999	0.583452	0.162565
A_23_P106241	9321	TRIP11	0.000719181	0.0094266	0.400606
A_23_P106258	283600	SLC25A47	0.113971	0.248171	-0.329904
A_23_P106280	55056	FLJ10038	0.000670005	0.00897774	-0.612725
A_23_P106299	10169	SERF2	0.233451	0.400883	0.322975
A_23_P106322	64506	CPEB1	0.151139	0.299551	-0.391974
A_23_P106362	366	AQP9	0.245636	0.414806	-0.338689
A_23_P106371	342096	GOLGA6A	0.015297	0.0663314	-0.40278
A_23_P106389	8482	SEMA7A	0.863301	0.919287	-0.0500377
A_23_P106391	56906	THAP10	0.422502	0.592468	0.115491
A_23_P10640	339221	ENPP7	0.351931	0.526766	-0.232147
A_23_P106405	4692	NDN	0.00276119	0.0220122	-0.665238
A_23_P106412	NA		0.00481171	0.0314742	-2.49177
A_23_P106425	348110	C15orf38	2.37e-05	0.00096635	-1.0291
A_23_P106433	91433	RCCD1	1.31e-06	0.000134074	-1.04792
A_23_P106439	91433	RCCD1	3.4e-07	5.07e-05	-0.645031
A_23_P106463	4947	OAZ2	1.8e-05	0.000804953	-0.791903
A_23_P10647	54360	CYTL1	0.0968473	0.22199	-0.523954
A_23_P106472	NA		0.0355228	0.113803	-0.628281
A_23_P106481	51234	TMEM85	0.000766902	0.00981336	0.557304
A_23_P106497	3658	IREB2	0.450906	0.6177	-0.102014
A_23_P106505	9836	LCMT2	0.199764	0.360761	-0.167595
A_23_P106522	54617	INO80	0.000308976	0.00547452	0.600163
A_23_P106532	113189	CHST14	0.173107	0.327464	-0.305895
A_23_P106544	56942	C16orf61	0.00108183	0.0122358	0.328797
A_23_P106559	64718	UNKL	0.549195	0.69818	-0.177626
A_23_P106562	2588	GALNS	0.0220209	0.0838153	-0.389012
A_23_P106575	2806	GOT2	0.822482	0.894476	0.0534376
A_23_P106602	83716	CRISPLD2	0.479674	0.642218	0.14004
A_23_P106617	58189	WFDC1	0.188728	0.347362	-0.504113
A_23_P106629	10261	IGSF6	0.601484	0.738205	0.166732
A_23_P106633	55794	DDX28	0.104733	0.234147	-0.317918
A_23_P106656	766	CA7	0.956276	0.974483	-0.0249253
A_23_P106661	113540	CMTM1	0.0121733	0.0571895	-0.850575
A_23_P106663	100529251	CKLF-CMTM1	0.0116068	0.0554897	-0.91571
A_23_P106675	5336	PLCG2	1.42e-05	0.000679152	-1.33819
A_23_P106682	2013	EMP2	2.24e-06	0.00019236	-1.12682
A_23_P106694	5119	CHMP1A	0.00914265	0.047421	-1.15236
A_23_P106708	6187	RPS2	0.572348	0.716134	-0.326979
A_23_P106720	10607	TBL3	0.170711	0.32429	0.178174
A_23_P106727	9727	RAB11FIP3	3.96e-05	0.00135024	-0.812127
A_23_P106737	55692	LUC7L	0.0587999	0.159428	-0.22355
A_23_P106741	5713	PSMD7	0.144167	0.290444	-0.325054
A_23_P106761	11151	CORO1A	0.000174228	0.00371653	-1.03677
A_23_P106773	6799	SULT1A2	0.0236019	0.0875804	-0.669223
A_23_P106798	6477	SIAH1	0.309253	0.483356	-0.21173
A_23_P106806	83886	PRSS27	0.00219148	0.0190806	-0.63994
A_23_P106814	NA		0.519663	0.674054	-0.149302
A_23_P106822	28987	NOB1	0.00516572	0.0329847	0.477636
A_23_P106835	583	BBS2	1.45e-06	0.000143276	-0.929884
A_23_P106844	4502	MT2A	0.485765	0.647013	-0.3382
A_23_P10685	23640	HSPBP1	0.153018	0.302	-0.380967
A_23_P106859	10328	COX4NB	0.185353	0.343232	0.292211
A_23_P106874	83449	PMFBP1	0.00427818	0.0292193	-0.568537
A_23_P106887	2521	FUS	0.87723	0.927254	-0.0246168
A_23_P106898	93129	ORAI3	0.000115435	0.0028222	-0.773919
A_23_P106906	5493	PPL	4.81e-05	0.00156299	-0.865331
A_23_P106922	4166	CHST6	0.0529743	0.148509	-1.08756
A_23_P106933	116285	ACSM1	0.727241	0.830508	0.117163
A_23_P106945	113	ADCY7	0.0900564	0.211509	-0.43851
A_23_P106973	10801	2009-09-01	0.00637578	0.0376342	-0.861153
A_23_P10699	29934	SNX12	0.138685	0.282918	-0.26759
A_23_P106998	51649	MRPS23	0.0236219	0.0876153	0.338674
A_23_P10701	323	APBB2	0.000886976	0.0107514	-0.928918
A_23_P107036	8834	TMEM11	0.112369	0.245669	-0.210801
A_23_P107048	NA		0.152729	0.301719	-0.346303
A_23_P107051	8557	TCAP	0.035512	0.113785	-1.05382
A_23_P107064	8711	TNK1	0.466351	0.631119	-0.190013
A_23_P107073	6117	RPA1	7.48e-05	0.00212913	-0.824099
A_23_P107087	55720	TSR1	5.21e-06	0.00033257	0.920525
A_23_P107102	84643	KIF2B	0.598057	0.73575	0.290851
A_23_P107116	7732	RNF112	0.0201414	0.0792626	-0.740157
A_23_P107132	5957	RCVRN	0.0737287	0.184885	0.423742
A_23_P107154	84669	USP32	0.113325	0.247119	-0.216657
A_23_P107166	79777	ACBD4	0.0161441	0.0685986	-0.696199
A_23_P107173	4222	MEOX1	0.00334224	0.0249013	-0.660588
A_23_P1072	476	ATP1A1	0.742402	0.840424	0.0464006
A_23_P107206	6774	STAT3	0.494818	0.653868	-0.0872733
A_23_P10721	9001	HAP1	0.0662601	0.17222	-0.420886
A_23_P107211	5878	RAB5C	0.0539108	0.150319	0.375619
A_23_P107214	5878	RAB5C	0.566181	0.711414	0.107957
A_23_P107238	54799	MBTD1	0.0442621	0.131656	-0.454277
A_23_P107247	8913	CACNA1G	2.15e-05	0.0009093	-1.37852
A_23_P107257	8405	SPOP	0.497645	0.656158	0.128681
A_23_P107283	3212	HOXB2	0.108491	0.239726	0.322676
A_23_P107295	114659	LRRC37B	0.207754	0.370715	0.121928
A_23_P107307	9058	SLC13A2	0.0254132	0.0917607	-1.22579
A_23_P107313	6388	SDF2	0.37892	0.552187	0.170447
A_23_P107322	84940	CORO6	0.00697718	0.0398918	-1.23015
A_23_P107336	9744	ACAP1	0.0176651	0.072791	-0.644655
A_23_P107350	6517	SLC2A4	0.96328	0.978512	0.0169711
A_23_P107351	728392	LOC728392	0.000438859	0.00684414	-0.459155
A_23_P107369	10749	KIF1C	0.0195369	0.0777154	-0.839989
A_23_P107373	4836	NMT1	0.298278	0.471632	-0.114073
A_23_P107394	84667	HES7	0.252747	0.422827	-0.325561
A_23_P107401	7077	TIMP2	0.00565563	0.0348274	-1.11106
A_23_P107412	5034	P4HB	0.0236209	0.0876153	0.885714
A_23_P107421	7083	TK1	0.0325008	0.107289	-0.756502
A_23_P10743	5158	PDE6B	0.0368098	0.116451	-0.538793
A_23_P107432	NA		0.00227187	0.019503	-1.05931
A_23_P107443	100510248	LOC100510248	0.592706	0.731522	-0.217953
A_23_P107454	83896	KRTAP3-1	0.000121718	0.00293038	-0.900697
A_23_P107465	3881	KRT31	0.0841536	0.201831	-0.473388
A_23_P107483	8392	OR3A3	0.747988	0.844253	0.0475767
A_23_P107507	10951	CBX1	0.0148959	0.0651796	-0.561073
A_23_P107513	79959	CEP76	0.0195828	0.0778376	0.613425
A_23_P10753	NA		0.0684831	0.176018	-0.690789
A_23_P107531	125336	LOXHD1	0.755825	0.849685	0.208208
A_23_P107552	22878	TRAPPC8	0.136654	0.280379	0.277864
A_23_P107565	361	AQP4	0.604676	0.74078	-0.219345
A_23_P107578	NA		0.996	0.997574	-0.00150955
A_23_P107587	4864	NPC1	0.0044	0.0297542	0.443845
A_23_P107597	5205	ATP8B1	0.0645781	0.16941	0.503265
A_23_P107612	5874	RAB27B	0.108983	0.240515	-0.448877
A_23_P107623	89777	SERPINB12	0.00233689	0.0198246	-0.395955
A_23_P107644	6632	SNRPD1	0.038017	0.118903	-0.279498
A_23_P107653	2109	ETFB	0.00160239	0.0156275	-0.881259
A_23_P107661	5518	PPP2R1A	0.0288048	0.0993687	-0.486512
A_23_P107673	140612	ZFP28	0.705859	0.815332	-0.0926648
A_23_P107684	25799	ZNF324	0.432536	0.601204	-0.227026
A_23_P107693	54807	ZNF586	0.00380204	0.0270311	0.604459
A_23_P107701	2067	ERCC1	0.166544	0.319018	-0.227048
A_23_P107714	57787	MARK4	0.0562264	0.154727	-0.704772
A_23_P107724	7771	ZFP112	0.00193851	0.0176502	-0.235681
A_23_P107735	973	CD79A	0.0337207	0.110181	-0.913644
A_23_P107744	53637	S1PR5	0.0201376	0.0792626	-0.835397
A_23_P107750	53637	S1PR5	0.868045	0.922088	0.032
A_23_P107763	10781	ZNF266	0.0315284	0.105221	-0.237142
A_23_P107775	147744	TMEM190	0.00566403	0.0348582	-1.52887
A_23_P107795	55101	ATP5SL	0.00562582	0.0347377	-0.284241
A_23_P107801	84167	C19orf44	0.0173549	0.0719318	-1.19764
A_23_P107847	353514	LILRA5	0.0899212	0.211252	-0.451885
A_23_P10785	143187	VTI1A	0.107987	0.238988	0.133832
A_23_P107855	84922	FIZ1	0.167647	0.320381	-0.521868
A_23_P107881	147837	ZNF563	0.171172	0.324871	0.249339
A_23_P107894	78992	YIPF2	0.00353076	0.0257949	1.06122
A_23_P107903	57139	RGL3	0.00200346	0.0180081	-1.15337
A_23_P107911	5655	KLK10	0.00491285	0.0318966	-1.46051
A_23_P107933	51231	VRK3	0.948268	0.96955	-0.0157694
A_23_P107942	25888	ZNF473	0.0485903	0.140128	0.201354
A_23_P107959	51070	NOSIP	0.0178726	0.0732916	-0.753266
A_23_P107963	2523	FUT1	0.302997	0.476755	-0.322657
A_23_P107974	2524	FUT2	0.158188	0.308931	-0.236901
A_23_P10798	1267	CNP	0.00953226	0.0487189	-0.52744
A_23_P107981	6820	SULT2B1	0.00613112	0.0366758	-1.73537
A_23_P107994	54958	TMEM160	0.00154016	0.0152713	-1.10146
A_23_P108028	7705	ZNF146	0.182372	0.33918	-0.366888
A_23_P108042	9437	NCR1	0.16139	0.312756	-0.414653
A_23_P108054	255043	TMEM86B	0.137679	0.281622	-0.584325
A_23_P108062	653499	LGALS7B	0.0290466	0.0998367	-0.994055
A_23_P108075	56301	SLC7A10	0.489092	0.649714	0.274373
A_23_P108082	84699	CREB3L3	0.0383289	0.119614	-0.804723
A_23_P108103	NA		0.0137886	0.0618729	-1.08611
A_23_P108129	7766	ZNF223	0.000116774	0.00283465	0.957863
A_23_P108135	8943	AP3D1	0.591576	0.730693	-0.18399
A_23_P108143	2593	GAMT	0.00274368	0.0219524	-1.56948
A_23_P10815	9698	PUM1	5.67e-06	0.000353939	-0.380604
A_23_P108157	27134	TJP3	5.34e-05	0.00168387	-0.819583
A_23_P108170	5675	PSG6	0.217241	0.381958	0.202874
A_23_P108180	116444	GRIN3B	0.00602321	0.0362234	-0.664724
A_23_P108200	5864	RAB3A	0.200082	0.361159	0.349453
A_23_P108216	5348	FXYD1	0.0493318	0.141441	-0.495345
A_23_P108221	83983	TSSK6	0.417104	0.587551	-0.181049
A_23_P108244	1340	COX6B1	0.0023457	0.0198681	-0.862831
A_23_P108265	26658	OR7C2	0.0459991	0.135108	-0.747349
A_23_P108280	66002	CYP4F12	0.330115	0.504862	-0.271201
A_23_P108294	8612	PPAP2C	0.0117666	0.0559859	-0.364054
A_23_P1083	2701	GJA4	0.516182	0.671026	-0.130601
A_23_P108303	4701	NDUFA7	0.306095	0.480062	0.124427
A_23_P108314	81794	ADAMTS10	0.864048	0.919708	-0.0246643
A_23_P108326	2063	NR2F6	0.068711	0.176458	-0.520599
A_23_P108331	6449	SGTA	0.123196	0.261765	-0.467425
A_23_P108342	51276	ZNF571	0.00322201	0.0243297	0.399957
A_23_P108376	63892	THADA	0.00693877	0.0397554	-0.806356
A_23_P10839	4735	2002-09-01	0.153395	0.30251	0.242192
A_23_P108394	NA		0.384083	0.556977	0.0675181
A_23_P108404	116987	AGAP1	0.0251181	0.0910479	0.545981
A_23_P108415	1615	DARS	0.0230924	0.0862602	-0.551273
A_23_P108427	11227	GALNT5	0.787822	0.871867	0.110817
A_23_P108437	7855	FZD5	0.167401	0.320017	-0.22396
A_23_P108463	57539	WDR35	0.496399	0.655191	0.0796978
A_23_P108492	92935	MARS2	0.755923	0.849724	0.0872537
A_23_P108501	2043	EPHA4	0.0317149	0.10563	-0.655333
A_23_P108514	8576	STK16	0.00658088	0.038397	-0.681334
A_23_P108522	79137	FAM134A	0.0375498	0.117936	-0.480637
A_23_P108534	NA		0.948475	0.969641	0.021906
A_23_P108546	5969	REG1P	0.365978	0.539732	-0.331702
A_23_P108554	1653	DDX1	0.879525	0.928248	-0.0360298
A_23_P108564	8708	B3GALT1	0.117099	0.252754	-0.758716
A_23_P108574	23683	PRKD3	0.234537	0.402093	-0.163742
A_23_P10858	23141	ANKLE2	0.877332	0.927293	0.0141755
A_23_P108592	5534	PPP3R1	0.00545412	0.0340416	0.615724
A_23_P108604	9448	MAP4K4	0.00671379	0.0389271	-0.565771
A_23_P108641	84908	FAM136A	0.832391	0.900642	-0.034777
A_23_P108657	151525	WDSUB1	0.579384	0.721568	-0.0856636
A_23_P108662	7841	MOGS	0.943095	0.9666	0.0178121
A_23_P108673	84141	FAM176A	0.00904268	0.0470877	-0.45026
A_23_P108699	2492	FSHR	0.681624	0.798405	0.0718066
A_23_P10870	22845	DOLK	0.365747	0.539527	0.178197
A_23_P108708	51255	RNF181	0.532113	0.684294	-0.148363
A_23_P10873	7096	TLR1	0.000123025	0.00294819	-1.09632
A_23_P108734	55821	ALLC	0.926588	0.956809	0.0350689
A_23_P108743	129446	XIRP2	0.229486	0.396565	0.491912
A_23_P108751	2274	FHL2	0.375289	0.548694	-0.194879
A_23_P108761	55571	C2orf29	0.300488	0.474029	0.181566
A_23_P108785	10096	ACTR3	0.154591	0.303908	-0.187693
A_23_P108819	94097	SFXN5	0.132537	0.274778	-0.337218
A_23_P108823	114880	OSBPL6	0.00269873	0.0216702	-0.831808
A_23_P108835	51646	YPEL5	0.0421693	0.127468	-0.393926
A_23_P108842	1844	DUSP2	0.149732	0.29785	-0.240633
A_23_P10885	7767	ZNF224	0.484999	0.646456	0.141011
A_23_P108871	84524	ZC3H8	0.0743524	0.18587	-0.30291
A_23_P108883	56660	KCNK12	0.7769	0.864417	0.0787604
A_23_P108911	57159	TRIM54	0.778112	0.865131	-0.066441
A_23_P108922	55233	MOBKL1B	0.365031	0.538868	-0.174754
A_23_P108932	56969	RPL23AP32	0.00574969	0.0351847	-1.0522
A_23_P108948	55686	MREG	0.0466126	0.136362	-0.295418
A_23_P108970	4867	NPHP1	0.726726	0.830245	0.0785998
A_23_P108990	NA		0.889752	0.934255	-0.0698831
A_23_P108994	6185	RPN2	0.0117552	0.0559575	0.425865
A_23_P109001	9675	TTI1	0.722629	0.826998	0.0503975
A_23_P109017	6431	SRSF6	0.104738	0.234147	0.254988
A_23_P10902	2487	FRZB	7.81e-08	1.88e-05	-1.12427
A_23_P109026	60598	KCNK15	0.011013	0.0536391	-0.7584
A_23_P109034	6385	SDC4	0.0818421	0.197896	-0.305267
A_23_P109055	112858	TP53RK	3.79e-05	0.00131435	0.753594
A_23_P109072	57167	SALL4	0.0354429	0.113679	-0.693835
A_23_P10911	196463	PLBD2	0.0904865	0.212154	-1.15443
A_23_P109122	57593	EBF4	0.00348783	0.0255862	-1.3153
A_23_P109133	551	AVP	0.957897	0.975227	0.0107722
A_23_P109143	5621	PRNP	0.0223931	0.0846545	0.574315
A_23_P109171	631	BFSP1	0.00625234	0.0371677	-1.19743
A_23_P109184	3642	INSM1	0.16159	0.312982	0.394402
A_23_P109193	63908	NAPB	0.412572	0.58299	-0.139003
A_23_P109201	57136	C20orf3	0.266863	0.438392	0.152798
A_23_P109224	140732	SUN5	0.0912177	0.213282	-0.420814
A_23_P109229	140732	SUN5	0.996424	0.997801	0.00123538
A_23_P109235	22913	RALY	0.0026261	0.0212703	-0.371104
A_23_P109254	9584	RBM39	0.305933	0.479941	0.136344
A_23_P109269	3911	LAMA5	0.0016924	0.0161406	-1.39514
A_23_P10927	83877	TM2D2	0.0306792	0.10345	0.421019
A_23_P109286	2897	GRIK1	0.743981	0.841445	0.129202
A_23_P109304	6526	SLC5A3	0.393162	0.565642	0.179077
A_23_P109320	53820	DSCR6	0.00982803	0.0497499	-0.412709
A_23_P109322	5121	PCP4	0.0169121	0.0708271	-0.917105
A_23_P109333	8209	C21orf33	0.959314	0.976046	0.00786546
A_23_P109345	754	PTTG1IP	0.80008	0.879987	-0.0606807
A_23_P10936	85285	KRTAP4-1	0.711848	0.819319	-0.13781
A_23_P109382	2928	GSC2	0.79358	0.875568	-0.0619573
A_23_P109393	421	ARVCF	0.00940299	0.0482446	-0.795505
A_23_P109410	80764	THAP7	0.677607	0.795306	0.090432
A_23_P109420	9790	BMS1	0.052703	0.14789	0.417854
A_23_P109427	2953	GSTT2	0.000714021	0.00937996	-0.773362
A_23_P109436	135	ADORA2A	0.00106137	0.0120945	-1.32094
A_23_P109442	89781	HPS4	0.0255621	0.0921522	-0.239987
A_23_P109446	89781	HPS4	8.28e-05	0.00227632	-0.410888
A_23_P109452	11200	CHEK2	0.00036788	0.00613882	-0.86311
A_23_P10947	246329	STAC3	0.215281	0.379706	-0.318869
A_23_P109470	8563	THOC5	0.000415115	0.00662246	0.335209
A_23_P109488	113791	PIK3IP1	0.0583404	0.158513	-0.249758
A_23_P109508	4689	NCF4	0.028406	0.0985652	-0.708624
A_23_P109547	54471	SMCR7L	0.038417	0.119779	0.271776
A_23_P10956	5239	PGM5	0.853324	0.913074	-0.0424599
A_23_P109593	25771	TBC1D22A	0.461241	0.62671	-0.144949
A_23_P109606	6305	SBF1	0.627383	0.758222	-0.0972813
A_23_P109614	4336	MOBP	0.77558	0.863304	-0.117719
A_23_P109636	26018	LRIG1	0.588194	0.728248	0.135745
A_23_P109643	80325	ABTB1	0.101103	0.22845	-0.856237
A_23_P109655	80723	TMEM22	0.000529757	0.0077627	1.14643
A_23_P10966	2562	GABRB3	0.11686	0.252358	0.397104
A_23_P109677	100506946	LOC100506946	0.188118	0.346567	-0.292287
A_23_P109682	64343	AZI2	0.000180166	0.00379783	0.569236
A_23_P109720	NA		0.204084	0.366101	-1.23195
A_23_P109733	152185	SPICE1	0.165705	0.317954	0.255691
A_23_P109768	9616	RNF7	0.0210877	0.0815569	0.512927
A_23_P109774	27107	ZBTB11	0.0102422	0.0510555	0.749231
A_23_P109785	8856	NR1I2	0.216067	0.380611	-0.544776
A_23_P109794	23243	ANKRD28	0.175758	0.330944	0.304248
A_23_P10980	23284	LPHN3	0.814856	0.889368	0.127628
A_23_P109812	6854	SYN2	0.180608	0.336979	-0.474682
A_23_P109821	10474	TADA3	0.00564267	0.0347912	-0.610942
A_23_P109843	3568	IL5RA	0.968891	0.981483	-0.00892213
A_23_P109864	2693	GHSR	0.364547	0.53848	-0.328778
A_23_P10987	NA		0.818019	0.89178	-0.0275216
A_23_P109877	80335	WDR82	0.705487	0.814974	-0.0488417
A_23_P109881	3700	ITIH4	0.00177502	0.016665	-1.62228
A_23_P109895	65010	SLC26A6	0.00026228	0.00491122	-1.22986
A_23_P109907	286676	ILDR1	0.00742338	0.0415882	-0.793537
A_23_P109913	10663	CXCR6	0.179532	0.335483	-0.445618
A_23_P109928	9861	PSMD6	0.0314364	0.105012	0.396092
A_23_P109934	51409	HEMK1	0.0204672	0.080084	-0.792746
A_23_P10995	27303	RBMS3	0.171767	0.325587	0.330627
A_23_P109950	93	ACVR2B	0.54805	0.697216	-0.171829
A_23_P109964	84692	CCDC54	0.353292	0.528109	-0.213911
A_23_P109974	51560	RAB6B	0.00151301	0.0151117	-0.61402
A_23_P109988	942	CD86	0.239608	0.407953	0.291333
A_23_P110005	84276	NICN1	0.000445647	0.00690414	-1.62814
A_23_P110022	2624	GATA2	0.00937682	0.0481766	-1.22088
A_23_P110031	51385	ZNF589	0.0014442	0.0147294	-1.09658
A_23_P11005	11173	ADAMTS7	0.0370244	0.116877	-0.91067
A_23_P110052	668	FOXL2	0.0594974	0.160698	-1.49963
A_23_P110062	8893	EIF2B5	0.553349	0.701329	-0.0686994
A_23_P110076	348793	WDR53	0.00777519	0.0428126	-0.286688
A_23_P110090	55779	WDR52	0.25964	0.430216	0.413028
A_23_P110108	84561	SLC12A8	0.0244933	0.0896962	0.429445
A_23_P110116	6452	SH3BP2	0.00768495	0.0424754	-1.05389
A_23_P110122	901	CCNG2	0.0909994	0.212955	-0.434337
A_23_P110135	57728	WDR19	0.0432499	0.129633	0.373618
A_23_P110151	83478	ARHGAP24	0.469278	0.633357	-0.147373
A_23_P110167	4258	MGST2	0.296896	0.470281	-0.433838
A_23_P11017	NA		0.00473481	0.0311801	-0.428103
A_23_P110175	1519	CTSO	0.0201233	0.0792439	-0.568994
A_23_P110184	6307	SC4MOL	0.0768235	0.190008	-0.603229
A_23_P110196	51191	HERC5	1.42e-08	6.02e-06	-1.17912
A_23_P1102	58	ACTA1	0.000284979	0.00518697	2.58397
A_23_P110204	6374	CXCL5	0.859899	0.916999	-0.0888716
A_23_P110212	2180	ACSL1	0.0967807	0.221925	0.430357
A_23_P110234	1446	CSN1S1	0.0361637	0.115162	-0.70975
A_23_P110243	57721	METTL14	0.0042253	0.0289937	-0.513172
A_23_P11025	7739	ZNF185	0.262748	0.433648	-0.136899
A_23_P110253	3815	KIT	0.0490638	0.140988	0.221631
A_23_P110266	79625	NDNF	0.486173	0.647304	0.21921
A_23_P110276	84740	AFAP1-AS1	0.368001	0.541463	-0.252839
A_23_P110288	79807	GSTCD	0.451211	0.618036	0.117074
A_23_P110299	6870	TACR3	0.801189	0.880687	-0.121013
A_23_P110304	246175	CNOT6L	0.160242	0.311267	-0.491278
A_23_P110319	80157	CWH43	0.760729	0.853278	-0.120845
A_23_P11032	84679	SLC9A7	0.380129	0.553199	0.180175
A_23_P110345	26511	CHIC2	0.00086456	0.010578	0.817399
A_23_P110362	8649	LAMTOR3	0.0388577	0.120667	1.02645
A_23_P110386	64854	USP46	0.284452	0.457587	-0.166318
A_23_P110403	27295	PDLIM3	0.362081	0.536106	0.11142
A_23_P110412	441027	TMEM150C	0.115721	0.250677	-0.565155
A_23_P110430	4487	MSX1	0.200558	0.361763	-0.366047
A_23_P110433	23398	PPWD1	0.00352764	0.0257859	0.444565
A_23_P110445	10307	APBB3	0.260885	0.43158	-0.263601
A_23_P110462	29930	PCDHB1	0.2789	0.451294	0.373231
A_23_P110473	4671	NAIP	0.398102	0.570114	-0.117971
A_23_P110492	10299	2006-03-01	0.258186	0.428687	-0.436993
A_23_P110504	81037	CLPTM1L	0.978793	0.987439	0.00421991
A_23_P11051	57187	THOC2	0.267672	0.439269	0.157638
A_23_P110531	10468	FST	0.000545819	0.00791803	-0.555203
A_23_P110557	90249	UNC5A	0.0541247	0.150734	-0.477776
A_23_P110569	55521	TRIM36	0.0257329	0.0925156	0.570161
A_23_P110571	375449	MAST4	0.0355232	0.113803	-1.11977
A_23_P110585	153768	PRELID2	0.129671	0.271098	-0.343458
A_23_P110598	134430	WDR36	0.0750235	0.187042	0.668188
A_23_P110606	9794	MAML1	0.704799	0.814383	-0.0518585
A_23_P110611	54826	GIN1	0.360991	0.535188	-0.117517
A_23_P110624	1501	CTNND2	0.245505	0.414654	-0.252164
A_23_P110643	51265	CDKL3	2.14e-06	0.000187154	-0.541679
A_23_P110655	NA		0.0223942	0.0846545	-1.26884
A_23_P110661	23517	SKIV2L2	0.0789943	0.193348	0.436881
A_23_P110686	8614	STC2	0.0198281	0.0783949	0.692557
A_23_P110699	91975	ZNF300	0.0678066	0.174891	-1.6543
A_23_P11070	84636	GPR174	0.821544	0.893835	-0.0563317
A_23_P110704	10569	SLU7	0.85127	0.911656	-0.0330339
A_23_P11071	64840	PORCN	0.0817789	0.197813	-0.445147
A_23_P110712	1843	DUSP1	0.00468848	0.0309995	1.6217
A_23_P110725	5562	PRKAA1	0.03045	0.102905	-0.295422
A_23_P110764	9499	MYOT	0.666514	0.787706	0.144684
A_23_P110777	3950	LECT2	0.325027	0.499475	0.33529
A_23_P110787	9522	SCAMP1	0.102237	0.230353	0.4749
A_23_P110791	1436	CSF1R	0.00826362	0.0444416	-0.656676
A_23_P110802	64946	CENPH	0.341143	0.515682	-0.156287
A_23_P11081	8852	AKAP4	0.0011514	0.0127107	-1.88381
A_23_P110811	1350	COX7C	0.228074	0.395009	-0.2241
A_23_P110837	50805	IRX4	0.231425	0.39862	-0.284252
A_23_P110846	9337	CNOT8	0.274568	0.446452	0.228545
A_23_P110851	7015	TERT	0.0215663	0.082761	-0.937611
A_23_P110879	10758	TRAF3IP2	0.0176199	0.0726585	0.385223
A_23_P110882	23270	TSPYL4	0.00180345	0.0168163	-0.235387
A_23_P110896	26503	SLC17A5	8.64e-07	0.000100661	1.18917
A_23_P110903	135295	SRSF12	0.595089	0.733282	0.100245
A_23_P110941	2941	GSTA4	3.93e-07	5.72e-05	-1.01925
A_23_P110957	2295	FOXF2	0.0059425	0.0359326	-0.292449
A_23_P110961	51660	BRP44L	1.92e-07	3.33e-05	2.16595
A_23_P111000	5698	PSMB9	0.000375033	0.00620264	-1.25213
A_23_P111005	25844	YIPF3	0.0709247	0.180168	0.316879
A_23_P111020	6722	SRF	0.40837	0.579188	0.124001
A_23_P11103	9210	BMP15	0.138272	0.282292	0.288953
A_23_P111037	8350	HIST1H3A	9.73e-06	0.000522153	-0.868766
A_23_P111041	8346	HIST1H2BI	0.278104	0.450469	-0.193372
A_23_P111054	3018	HIST1H2BB	0.0180888	0.0738024	-0.455591
A_23_P111088	81697	OR2B2	0.0447371	0.132626	-0.37149
A_23_P111092	26716	OR2H1	0.269608	0.441098	-0.470982
A_23_P111112	57176	VARS2	0.036426	0.115611	-0.755407
A_23_P111126	10866	HCP5	7.5e-06	0.000430101	-0.930732
A_23_P111132	3303	HSPA1A	0.0520018	0.146393	-0.435638
A_23_P111141	7917	BAG6	0.131141	0.273182	-0.315228
A_23_P111155	221527	ZBTB12	0.907987	0.945628	0.0509097
A_23_P111171	8705	B3GALT4	0.00633416	0.0374849	-1.39567
A_23_P111188	9278	ZBTB22	0.219989	0.38539	-0.207872
A_23_P11119	NA		0.00640117	0.0377189	-0.702958
A_23_P111194	25803	SPDEF	0.0321395	0.106625	-0.36233
A_23_P111206	2289	FKBP5	0.000418113	0.00664701	-1.28663
A_23_P111228	51805	COQ3	0.313671	0.48775	0.131821
A_23_P111240	9749	PHACTR2	0.0337157	0.110173	0.528632
A_23_P111260	4907	NT5E	0.0411062	0.125352	0.487665
A_23_P111267	83699	SH3BGRL2	0.717245	0.823335	0.329469
A_23_P111273	51256	TBC1D7	0.274372	0.446209	-0.1145
A_23_P111288	51522	TMEM14C	0.969575	0.98206	-0.0085419
A_23_P111297	10799	RPP40	0.0873427	0.207008	0.17238
A_23_P111303	22828	SCAF8	0.594787	0.733098	0.0732709
A_23_P111306	22828	SCAF8	0.147129	0.29446	0.233459
A_23_P111311	9590	AKAP12	0.0115528	0.0552716	0.854666
A_23_P111321	383	ARG1	0.345907	0.520634	-0.389974
A_23_P111343	9774	BCLAF1	0.0426659	0.128436	-0.453977
A_23_P111360	3298	HSF2	0.806825	0.884464	-0.0459715
A_23_P111361	285755	PPIL6	0.00659284	0.0384559	0.808167
A_23_P111373	57380	MRS2	0.028961	0.0996867	0.516213
A_23_P111381	9474	ATG5	0.599266	0.736685	0.0962923
A_23_P111395	6582	SLC22A2	0.926542	0.956809	0.015467
A_23_P111402	84870	RSPO3	0.127703	0.26827	0.547482
A_23_P111413	95681	TSGA14	0.728286	0.831261	-0.0490821
A_23_P11144	1121	CHM	0.963413	0.978569	0.0126896
A_23_P111452	116988	AGAP3	0.68787	0.802579	0.05791
A_23_P111480	64940	STAG3L4	0.00319262	0.024191	0.487159
A_23_P111481	51593	SRRT	0.298362	0.471655	-0.193896
A_23_P111487	51593	SRRT	0.270727	0.442223	-0.25683
A_23_P111492	64598	MOSPD3	0.034107	0.110992	-0.789195
A_23_P111506	100316904	SAP25	0.636945	0.765589	-0.127392
A_23_P111517	64409	WBSCR17	0.270709	0.442211	-0.307758
A_23_P111525	NA		0.00166393	0.0159994	0.804372
A_23_P111531	2737	GLI3	0.000144627	0.00328516	-1.22173
A_23_P111571	3200	HOXA3	0.229897	0.397025	-0.192529
A_23_P111583	948	CD36	0.00812984	0.0440519	-0.531492
A_23_P111593	9265	CYTH3	0.170932	0.324605	-0.162439
A_23_P11160	79649	MAP7D3	0.255514	0.425562	0.135029
A_23_P111604	30010	NXPH1	0.29715	0.47049	-0.553748
A_23_P111621	9569	GTF2IRD1	2.39e-08	7.91e-06	-0.863341
A_23_P111635	51657	STYXL1	0.000826766	0.0102847	0.530629
A_23_P111657	6469	SHH	0.52016	0.6744	0.220846
A_23_P111662	340273	ABCB5	0.636972	0.765589	-0.121746
A_23_P111672	26136	TES	0.73301	0.834168	-0.0691824
A_23_P111698	7975	MAFK	0.350595	0.525408	0.266754
A_23_P1117	54879	ST7L	0.249071	0.418679	-0.218641
A_23_P111701	2791	GNG11	0.061789	0.164696	-0.298606
A_23_P111712	7978	MTERF	0.276805	0.449038	0.201783
A_23_P111724	154661	RUNDC3B	0.195801	0.355938	-0.512055
A_23_P111737	10268	RAMP3	0.324692	0.499189	-0.249743
A_23_P111745	83637	ZMIZ2	0.0113119	0.054525	-1.19517
A_23_P111753	64983	MRPL32	0.511603	0.667487	0.20679
A_23_P111766	NA		0.236611	0.404644	-0.299346
A_23_P111797	84214	DKFZP434F142	0.134703	0.27778	-0.386664
A_23_P111804	64761	PARP12	0.0117934	0.056083	-0.713366
A_23_P111811	54556	ING3	0.000984934	0.0115411	-0.607159
A_23_P111826	6677	SPAM1	0.303233	0.476945	-0.226102
A_23_P111835	1738	DLD	0.259638	0.430216	-0.150638
A_23_P111843	10467	ZNHIT1	0.827747	0.89751	-0.0418989
A_23_P111860	55698	RADIL	0.0011914	0.013033	-0.800761
A_23_P111865	7589	ZSCAN21	0.381205	0.554293	0.274064
A_23_P111888	115908	CTHRC1	0.0127936	0.0589966	0.578307
A_23_P111919	29942	PURG	0.968356	0.98126	-0.00597188
A_23_P11192	10477	UBE2E3	0.058372	0.158573	-0.190977
A_23_P111929	51633	OTUD6B	0.0908445	0.212751	0.280873
A_23_P111947	1015	CDH17	0.00967419	0.0492356	0.66239
A_23_P111961	84549	MAK16	1.63e-06	0.000155753	0.444008
A_23_P111978	51305	KCNK9	0.157244	0.307601	-0.467382
A_23_P111981	66004	LYNX1	0.00369916	0.0265422	-2.08531
A_23_P111995	4017	LOXL2	1.7e-08	6.89e-06	-1.26569
A_23_P112004	23639	LRRC6	0.0225788	0.0850858	-0.527065
A_23_P11201	2857	GPR34	0.0412633	0.125732	-0.516364
A_23_P112016	10395	DLC1	0.0853314	0.203845	0.357971
A_23_P112026	3620	IDO1	2.42e-06	0.000201008	-1.70363
A_23_P112061	138050	HGSNAT	0.000242491	0.00465139	-0.801223
A_23_P112078	9258	MFHAS1	0.875934	0.926549	0.0259417
A_23_P112086	1670	DEFA5	0.855141	0.914183	-0.0610933
A_23_P112100	54212	SNTG1	0.497161	0.6558	0.222643
A_23_P112103	79792	GSDMD	0.00226653	0.0194735	-1.11682
A_23_P112113	9897	KIAA0196	0.659261	0.782381	-0.0424625
A_23_P112135	23471	TRAM1	0.0337808	0.110314	0.929051
A_23_P11214	55922	NKRF	0.00809281	0.0439299	-0.674456
A_23_P112159	27161	EIF2C2	0.161828	0.313354	-0.226192
A_23_P112162	8694	DGAT1	0.00549439	0.0341888	-1.14906
A_23_P112173	25769	SLC24A2	0.517651	0.672466	0.177277
A_23_P112187	84929	FIBCD1	0.0387484	0.12047	-0.901785
A_23_P112201	23081	KDM4C	0.00793213	0.0433334	0.704748
A_23_P112220	3641	INSL4	0.0716517	0.181486	-0.429874
A_23_P11224	93380	MMGT1	0.305056	0.479041	0.078315
A_23_P112241	25822	DNAJB5	0.0690675	0.177063	-0.560964
A_23_P112251	2790	GNG10	0.160054	0.311077	-0.134062
A_23_P112260	2790	GNG10	0.492829	0.652564	-0.177264
A_23_P112275	9568	GABBR2	0.209681	0.373357	-0.222705
A_23_P112289	7111	TMOD1	0.134818	0.27783	-0.434271
A_23_P112296	1621	DBH	0.553484	0.701436	-0.111041
A_23_P112311	22954	TRIM32	0.355929	0.530793	-0.152972
A_23_P112327	29991	OBP2A	0.599231	0.736685	-0.104718
A_23_P112341	80010	RMI1	1.12e-07	2.3e-05	-0.638131
A_23_P11237	6872	TAF1	0.105673	0.235353	0.254311
A_23_P112397	54461	FBXW5	0.041194	0.125573	-0.597318
A_23_P112406	9328	GTF3C5	0.00250711	0.0206776	-0.738023
A_23_P112412	54881	TEX10	0.527621	0.680652	-0.0656505
A_23_P112429	11224	RPL35	0.0905734	0.212298	-0.682892
A_23_P11244	64219	PJA1	0.368503	0.541974	0.208491
A_23_P112452	2681	GGTA1P	0.842443	0.906304	0.103225
A_23_P112470	6366	CCL21	0.396795	0.569006	-0.263965
A_23_P112478	318	NUDT2	0.0172313	0.0716446	-0.499386
A_23_P112481	360	AQP3	0.000158841	0.003507	-1.05972
A_23_P112482	360	AQP3	0.000422691	0.00668867	-0.893088
A_23_P112512	92014	MCART1	0.0318383	0.105921	0.40102
A_23_P112531	399665	FAM102A	1.68e-05	0.000764451	-0.700514
A_23_P112548	81932	HDHD3	2.83e-05	0.00107598	-0.703844
A_23_P112554	1306	COL15A1	0.000103476	0.00260916	-0.934284
A_23_P11256	139599	MAGEE2	0.564079	0.709714	0.165495
A_23_P112564	3751	KCND2	0.000269525	0.00499345	-1.26123
A_23_P112596	132	ADK	2.2e-06	0.000190415	1.04545
A_23_P1126	54741	LEPROT	0.00293028	0.0228536	-0.666059
A_23_P112602	55223	TRIM62	0.00116117	0.0127835	-0.869554
A_23_P112613	5718	PSMD12	0.00104997	0.0120147	0.837529
A_23_P11262	8263	F8A1	0.0098318	0.0497499	-0.512208
A_23_P112634	201895	C4orf34	0.00033331	0.00575065	0.568962
A_23_P112646	28	ABO	0.16106	0.312324	0.339661
A_23_P112652	25904	CNOT10	0.576224	0.719205	0.0817678
A_23_P112666	2301	FOXE3	0.276169	0.448326	-0.186711
A_23_P112673	55055	ZWILCH	0.359342	0.533933	-0.206007
A_23_P112698	10687	PNMA2	0.453891	0.620117	0.203872
A_23_P112726	6335	SCN9A	0.00542695	0.0339185	-1.35073
A_23_P112774	11156	PTP4A3	0.0857061	0.204466	-0.588211
A_23_P11279	79868	ALG13	3.53e-05	0.00124161	0.76028
A_23_P112798	1397	CRIP2	0.00203471	0.0181666	-0.870878
A_23_P112801	11261	CHP	0.845402	0.908041	0.0318261
A_23_P112820	1903	S1PR3	0.532773	0.684755	-0.095215
A_23_P112825	51451	LCMT1	0.412567	0.58299	0.153063
A_23_P112846	441024	MTHFD2L	0.035924	0.11462	0.635466
A_23_P112859	1469	CST1	0.0100473	0.0504273	-0.610218
A_23_P11286	3188	HNRNPH2	0.0514159	0.145273	0.214258
A_23_P112874	2262	GPC5	0.288558	0.4618	-0.340959
A_23_P112883	340371	NRBP2	3.31e-07	4.96e-05	-1.25166
A_23_P112916	170691	ADAMTS17	0.427259	0.596548	-0.366649
A_23_P112921	80765	STARD5	0.00188413	0.0173444	-0.595243
A_23_P11295	100272147	MTCP1NB	0.000520979	0.00766971	-0.509597
A_23_P112950	55729	ATF7IP	2.28e-05	0.000946026	-1.16898
A_23_P112957	NA		0.936384	0.962802	0.0295793
A_23_P112982	55530	SVOP	0.304817	0.478832	-0.440608
A_23_P113005	1942	EFNA1	9.81e-05	0.00253019	-0.872599
A_23_P113019	348980	HCN1	0.285982	0.459184	-0.159828
A_23_P113026	5073	PARN	0.0656857	0.171263	0.23363
A_23_P113034	83938	C10orf11	0.00545754	0.034057	-0.315683
A_23_P113056	NA		0.814388	0.889015	0.0451174
A_23_P11309	55558	PLXNA3	0.868108	0.922131	-0.0743217
A_23_P113101	NA		0.119603	0.256511	-0.200715
A_23_P113111	367	AR	0.373144	0.546643	-0.31372
A_23_P113161	81563	C1orf21	0.518392	0.672909	-0.168368
A_23_P113184	79068	FTO	0.262475	0.433319	-0.20093
A_23_P113204	2248	FGF3	0.240414	0.408884	-0.386185
A_23_P113212	55076	TMEM45A	3.3e-11	9.03e-08	2.12754
A_23_P113237	64109	CRLF2	0.309517	0.48367	0.188191
A_23_P113245	3516	RBPJ	0.395202	0.567642	0.104456
A_23_P113258	10125	RASGRP1	0.136893	0.280669	-0.297607
A_23_P113263	NA		0.0724921	0.182719	-0.927318
A_23_P113283	64393	ZMAT3	0.792232	0.87457	0.0353554
A_23_P11331	90843	TCEAL8	0.00106957	0.0121508	0.660241
A_23_P113311	54681	P4HTM	0.122616	0.26098	-0.23181
A_23_P113317	54681	P4HTM	0.681591	0.798398	-0.0336441
A_23_P113328	360023	ZBTB41	0.0551917	0.152844	0.732323
A_23_P113351	8404	SPARCL1	0.860345	0.917236	-0.0667852
A_23_P113367	117583	PARD3B	0.581068	0.722874	0.0966762
A_23_P113380	55031	USP47	3.97e-05	0.00135075	0.747969
A_23_P113382	23426	GRIP1	0.676256	0.794379	-0.0948402
A_23_P113393	8862	APLN	0.486828	0.647878	0.115466
A_23_P113405	26505	CNNM3	0.0197251	0.0781895	-1.36114
A_23_P11341	90736	FAM104B	0.000591862	0.00831039	-0.409102
A_23_P113417	80233	C17orf70	0.0411456	0.125453	-0.660533
A_23_P113441	55164	SHQ1	0.00907175	0.0471768	0.739176
A_23_P113453	NA		0.241458	0.410167	-0.385296
A_23_P113462	55605	KIF21A	0.0652862	0.170547	0.588019
A_23_P113471	158584	FAAH2	0.0852465	0.203701	-0.327766
A_23_P113523	8225	GTPBP6	0.00816861	0.0441372	-0.938147
A_23_P11353	10159	ATP6AP2	0.0187412	0.0754698	0.582397
A_23_P113549	NA		0.426011	0.595434	-0.406798
A_23_P113553	4110	MAGEA11	0.219988	0.38539	0.220335
A_23_P113570	3651	PDX1	0.66974	0.789922	-0.070787
A_23_P113572	930	CD19	0.00700182	0.0399529	-0.724066
A_23_P113613	64866	CDCP1	0.138408	0.282479	-0.720516
A_23_P11362	9767	PHF16	0.401137	0.572837	0.183717
A_23_P113623	84311	MRPL45	0.000681961	0.00908227	-0.234452
A_23_P113634	865	CBFB	0.602857	0.739237	-0.110603
A_23_P113645	NA		0.575696	0.718896	-0.127661
A_23_P113656	10382	TUBB4	0.527885	0.680906	-0.245446
A_23_P113682	142680	SLC34A3	0.22838	0.395288	-0.430604
A_23_P113692	NA		0.0806291	0.195964	-0.667859
A_23_P113701	5154	PDGFA	0.0382683	0.119506	-0.828957
A_23_P113716	NA		0.0504834	0.143588	-0.988242
A_23_P11372	3251	HPRT1	0.868593	0.922408	-0.028755
A_23_P113728	92170	MTG1	0.88817	0.933574	0.0377191
A_23_P113738	NA		0.787638	0.871846	-0.0772929
A_23_P113748	79750	ZNF385D	0.44965	0.6167	-0.210476
A_23_P113762	NA		0.388065	0.560848	-0.16809
A_23_P113777	9358	ITGBL1	0.230965	0.398215	0.189624
A_23_P113789	10869	USP19	0.031838	0.105921	-0.159965
A_23_P113793	79413	ZBED2	0.0328278	0.108151	-2.29546
A_23_P113803	11104	KATNA1	0.914752	0.949863	-0.0213831
A_23_P113811	NA		0.251052	0.420867	0.155824
A_23_P113825	138151	NACC2	0.0106181	0.0523122	-0.812942
A_23_P113841	NA		0.296067	0.46934	-0.146559
A_23_P113888	129563	DIS3L2	0.0372834	0.117432	-0.584903
A_23_P11390	9084	VCY	0.0704375	0.179364	-0.67632
A_23_P113952	NA		0.194588	0.354443	-0.428818
A_23_P113966	55763	EXOC1	0.00166314	0.0159955	-0.403999
A_23_P11397	83868	TTTY13	0.0135058	0.0611047	-0.856995
A_23_P113972	55763	EXOC1	0.369901	0.543524	0.185889
A_23_P113994	55243	KIRREL	0.0400512	0.123087	-1.06583
A_23_P114008	79853	TM4SF20	0.61708	0.750401	-0.225271
A_23_P114048	NA		0.205568	0.367952	0.704001
A_23_P114057	54910	SEMA4C	0.00045045	0.00694857	-1.0573
A_23_P114061	80036	TRPM3	0.010326	0.0513111	-1.06488
A_23_P114075	2186	BPTF	0.000305641	0.00543657	-0.683615
A_23_P11408	442862	PRY2	0.965684	0.979541	-0.00931688
A_23_P114084	5251	PHEX	0.389247	0.561876	0.0976104
A_23_P114095	51360	MBTPS2	0.108886	0.240391	-0.189926
A_23_P114105	23641	LDOC1	0.177624	0.33319	0.197892
A_23_P114118	10389	SCML2	0.875091	0.92607	-0.0207175
A_23_P114134	10214	SSX3	0.146498	0.293665	-0.450465
A_23_P114144	28952	CCDC22	0.00238448	0.0200705	-0.872408
A_23_P114155	27238	GPKOW	0.645714	0.772385	-0.0500637
A_23_P114164	29978	UBQLN2	0.436375	0.604561	0.111723
A_23_P114172	54885	TBC1D8B	0.0148959	0.0651796	0.390342
A_23_P114185	7102	TSPAN7	0.722675	0.826998	-0.0886908
A_23_P114210	5456	POU3F4	0.00862268	0.0457117	-0.632651
A_23_P114221	5931	RBBP7	0.0312174	0.104594	-0.610261
A_23_P114232	10549	PRDX4	0.00344868	0.025399	0.776495
A_23_P114259	140456	ASB11	0.64178	0.769624	-0.138084
A_23_P114275	10857	PGRMC1	0.0879204	0.207862	0.59482
A_23_P114282	28985	MCTS1	0.154044	0.303353	0.18344
A_23_P114299	2833	CXCR3	0.382374	0.55529	-0.251725
A_23_P114307	5030	P2RY4	0.858807	0.916397	-0.0348816
A_23_P114314	1046	CDX4	0.713376	0.820271	0.137471
A_23_P114349	170626	XAGE3	0.188947	0.347594	-0.394881
A_23_P114353	55998	NXF5	0.0814799	0.197336	-0.537559
A_23_P114361	4204	MECP2	0.120465	0.257808	-0.563326
A_23_P114374	5956	OPN1LW	0.739102	0.838494	-0.0826812
A_23_P114381	26576	SRPK3	0.475841	0.639173	-0.150113
A_23_P114405	9643	MORF4L2	0.00050279	0.00748525	1.14548
A_23_P114414	79836	LONRF3	0.230063	0.397194	0.162034
A_23_P114423	9104	RGN	0.00415951	0.0286911	-0.807505
A_23_P114445	57692	MAGEE1	0.200596	0.361785	-0.305775
A_23_P114466	90665	TBL1Y	0.0398498	0.122623	-2.01518
A_23_P1145	55149	MTPAP	0.0587107	0.159276	0.157364
A_23_P114582	NA		0.000492749	0.00738176	-1.17283
A_23_P114585	80003	PCNXL2	0.901627	0.941779	-0.020018
A_23_P114597	6706	SPRR2G	0.802398	0.881371	-0.0573051
A_23_P11461	7335	UBE2V1	0.787074	0.871504	-0.0336425
A_23_P114616	81573	ANKRD13C	0.0712641	0.18084	0.230944
A_23_P114626	462	SERPINC1	0.202245	0.36383	-0.464352
A_23_P114649	60672	MIIP	0.000447484	0.00691811	-1.19425
A_23_P114656	3065	HDAC1	6.74e-07	8.42e-05	-0.785079
A_23_P114662	1429	CRYZ	0.540466	0.691133	0.116815
A_23_P114670	27237	ARHGEF16	0.0544761	0.151415	-0.55419
A_23_P114689	55616	ASAP3	0.00274544	0.0219589	-0.794635
A_23_P114707	9563	H6PD	0.295799	0.469122	-0.385146
A_23_P114713	1580	CYP4B1	0.00486343	0.0316861	-0.783259
A_23_P114736	3766	KCNJ10	0.659583	0.782695	0.0474304
A_23_P114740	3075	CFH	0.461829	0.627111	-0.337877
A_23_P114774	10654	PMVK	0.0362379	0.115291	-0.488999
A_23_P114783	142	PARP1	0.861666	0.918117	-0.0199574
A_23_P114808	51102	MECR	0.0448231	0.132792	-0.290171
A_23_P114814	58480	RHOU	0.000584383	0.00823924	-0.80906
A_23_P114826	64960	MRPS15	0.576259	0.719205	0.0685134
A_23_P114839	2275	FHL3	0.39655	0.568839	-0.199329
A_23_P114857	30814	PLA2G2E	0.363705	0.537696	-0.416186
A_23_P114862	10218	ANGPTL7	0.869608	0.923012	0.112279
A_23_P114879	51361	HOOK1	0.0183154	0.0743938	0.388657
A_23_P114883	2331	FMOD	0.457614	0.623454	-0.177303
A_23_P114903	3310	HSPA6	0.0115279	0.0551767	0.945817
A_23_P114929	25874	BRP44	0.698753	0.810376	0.0710909
A_23_P114934	84944	MAEL	0.882828	0.930153	-0.0364745
A_23_P114947	5997	RGS2	0.619454	0.75224	0.0638234
A_23_P114952	252839	TMEM9	0.000884019	0.0107297	-0.451897
A_23_P114968	5738	PTGFRN	0.000203377	0.0041382	-0.738537
A_23_P114983	84676	TRIM63	0.0836094	0.200844	-0.487301
A_23_P115011	54507	ADAMTSL4	1.48e-05	0.000698571	-1.41006
A_23_P115021	88	ACTN2	0.0293542	0.10048	-0.578069
A_23_P115022	128218	TMEM125	0.461362	0.626747	-0.266299
A_23_P115036	9670	IPO13	0.0696957	0.178096	-0.693309
A_23_P115046	8891	EIF2B3	0.00281355	0.0222265	0.528367
A_23_P115052	6016	RIT1	0.497611	0.656158	-0.154318
A_23_P115064	1382	CRABP2	0.640176	0.768203	-0.130658
A_23_P11507	26009	ZZZ3	0.0477059	0.138425	0.197717
A_23_P115091	57111	RAB25	0.00386262	0.0272812	-0.465904
A_23_P115105	26099	C1orf144	0.142324	0.288076	-0.216535
A_23_P115118	656	BMP8B	0.0812055	0.196903	-0.58501
A_23_P115124	81559	TRIM11	0.0397354	0.122392	-0.905418
A_23_P115137	10542	HBXIP	0.0142404	0.0631812	0.727624
A_23_P115149	79084	WDR77	0.726871	0.830277	0.0455078
A_23_P115161	2532	DARC	0.581631	0.72321	-0.106653
A_23_P115167	23507	LRRC8B	0.521884	0.675759	-0.140554
A_23_P115190	4803	NGF	0.329816	0.504612	0.209408
A_23_P115192	83417	FCRL4	0.0176792	0.0728345	-1.1175
A_23_P115200	83417	FCRL4	0.716096	0.822384	0.0795474
A_23_P115201	83417	FCRL4	0.059742	0.161199	-0.553088
A_23_P115202	49860	CRNN	0.239879	0.408229	-0.27534
A_23_P115215	6944	VPS72	0.0659742	0.171764	-0.323211
A_23_P115223	10456	HAX1	0.523964	0.677554	-0.0649368
A_23_P115246	8547	FCN3	0.083067	0.20002	-0.44546
A_23_P115261	183	AGT	0.264875	0.43614	-0.27151
A_23_P115286	8915	BCL10	0.00905254	0.0471127	0.62227
A_23_P115313	64222	TOR3A	2.57e-05	0.0010205	-0.506131
A_23_P115316	64222	TOR3A	0.000115219	0.0028203	-0.641095
A_23_P115331	27245	AHDC1	0.00464826	0.030833	-1.37629
A_23_P115346	1939	EIF2D	0.0144283	0.0637142	0.335816
A_23_P115356	8574	AKR7A2	4.95e-06	0.000327021	-0.523656
A_23_P115366	51727	CMPK1	0.0293967	0.100598	1.03815
A_23_P115375	653604	HIST2H3D	0.827323	0.897227	0.0309369
A_23_P115407	2944	GSTM1	0.453465	0.619859	-0.0896461
A_23_P115417	23179	RGL1	0.0142545	0.0632277	-0.874003
A_23_P11543	2517	FUCA1	0.332079	0.506792	-0.181711
A_23_P115444	8995	TNFSF18	0.210049	0.373799	0.478264
A_23_P115460	6146	RPL22	0.739078	0.83849	0.0768906
A_23_P115467	6276	S100A5	0.351262	0.526053	0.301268
A_23_P115478	29943	PADI1	0.0184414	0.0747573	-0.626325
A_23_P115482	29089	UBE2T	0.0415908	0.126444	-0.366622
A_23_P115492	79805	VASH2	2.11e-08	7.52e-06	-1.63368
A_23_P115519	84648	LCE3D	0.341039	0.515545	0.153854
A_23_P115523	65094	JMJD4	0.904023	0.9432	0.0252957
A_23_P115534	79932	KIAA0319L	0.0461733	0.135502	-0.536494
A_23_P115563	81472	OR2C3	0.446482	0.613691	-0.271024
A_23_P115573	149345	SHISA4	0.000780165	0.009943	-1.14202
A_23_P115597	22852	ANKRD26	7.82e-05	0.00219969	-0.441769
A_23_P115608	57584	ARHGAP21	0.263155	0.434109	0.221736
A_23_P115616	NA		0.00384664	0.027232	0.24855
A_23_P115636	1787	TRDMT1	0.0755021	0.187862	0.205536
A_23_P11564	9813	KIAA0494	0.965535	0.979534	0.00708788
A_23_P115645	10659	CELF2	0.646926	0.773355	-0.142221
A_23_P115652	653509	SFTPA1	0.0751625	0.187278	-0.425826
A_23_P115683	79803	HPS6	0.230399	0.397607	-0.238324
A_23_P115699	5662	PSD	0.270821	0.442341	-0.30317
A_23_P115703	84108	PCGF6	0.378443	0.551744	0.174197
A_23_P115726	220963	SLC16A9	0.928106	0.95775	0.0225875
A_23_P115732	648	BMI1	0.161505	0.31293	0.121528
A_23_P115743	63877	FAM204A	0.467541	0.632187	-0.160907
A_23_P115762	11319	ECD	0.0193712	0.0772387	0.235968
A_23_P115780	26103	LRIT1	0.331412	0.506112	0.281982
A_23_P115785	92565	FANK1	5.11e-05	0.00162312	-0.986893
A_23_P115792	59338	PLEKHA1	0.288398	0.461634	-0.329356
A_23_P115805	93426	SYCE1	0.0229474	0.0859669	0.388839
A_23_P115824	3189	HNRNPH3	0.955055	0.973649	0.00834709
A_23_P115838	26148	C10orf12	0.550813	0.699326	0.0806028
A_23_P115842	55749	CCAR1	0.717203	0.82331	0.0535871
A_23_P115861	220992	ZNF485	0.274846	0.446798	0.238505
A_23_P115862	118881	COMTD1	0.210408	0.374131	-0.352308
A_23_P115872	55165	CEP55	0.350665	0.525454	0.177391
A_23_P115885	9562	MINPP1	0.803685	0.882191	0.0502217
A_23_P115902	NA		0.00836025	0.0448183	-0.560109
A_23_P115919	5264	PHYH	0.867621	0.921924	0.0337799
A_23_P115922	1979	EIF4EBP2	0.196817	0.357168	-0.175205
A_23_P115932	338567	KCNK18	0.129424	0.270787	0.438832
A_23_P115955	219927	MRPL21	0.789808	0.873199	0.0612001
A_23_P11598	127396	ZNF684	0.317055	0.491447	0.161585
A_23_P115998	6688	SPI1	0.525449	0.678703	-0.126854
A_23_P116007	9479	MAPK8IP1	0.999347	0.999518	-0.000185478
A_23_P116013	10929	SRSF8	0.00121889	0.0132208	1.19372
A_23_P116016	10929	SRSF8	0.000242244	0.00464982	0.921446
A_23_P116025	9440	MED17	0.0360873	0.114981	0.339945
A_23_P116037	7108	TM7SF2	0.000374692	0.00620264	-0.873263
A_23_P116081	84153	RNASEH2C	0.00109421	0.0123249	-1.07396
A_23_P116091	10072	DPP3	6.83e-06	0.000404507	-0.855931
A_23_P116114	5140	PDE3B	0.974673	0.985152	-0.00821578
A_23_P116123	1111	CHEK1	0.933147	0.960824	-0.00770838
A_23_P116145	414301	DDI1	0.227293	0.394138	-0.395234
A_23_P116168	84437	KIAA1826	0.0105918	0.052239	0.430997
A_23_P116173	120376	C11orf93	0.0969925	0.222248	-0.577855
A_23_P116187	83875	BCO2	0.0180549	0.0737117	-0.382927
A_23_P116195	NA		0.274375	0.446209	-0.28089
A_23_P116207	56912	IFT46	0.778535	0.865508	-0.0406328
A_23_P116235	4192	MDK	0.000994368	0.0116217	-1.18372
A_23_P116249	2900	GRIK4	0.594599	0.732904	0.173634
A_23_P116259	55800	SCN3B	0.175946	0.331104	0.384072
A_23_P116264	4900	NRGN	0.0146105	0.0642736	-1.64041
A_23_P116280	7490	WT1	0.341415	0.516037	0.145227
A_23_P116286	272	AMPD3	0.0192151	0.0768557	-0.39475
A_23_P11629	199964	TMEM61	0.399496	0.571461	-0.191908
A_23_P116371	931	MS4A1	0.195582	0.355831	-0.345996
A_23_P116376	79869	CPSF7	0.109506	0.241359	0.32274
A_23_P116387	3619	INCENP	0.000178285	0.00376983	-0.539188
A_23_P116414	11145	PLA2G16	0.000500485	0.00746273	-1.5284
A_23_P116430	10083	USH1C	0.153992	0.303294	-0.83021
A_23_P116435	51214	IGF2AS	0.572748	0.716393	0.214417
A_23_P11644	6703	SPRR2D	0.0370778	0.116983	-0.68971
A_23_P116473	NA		0.419657	0.589949	-0.177923
A_23_P116512	79899	PRR5L	0.684532	0.800314	0.0890897
A_23_P11652	7398	USP1	0.792591	0.874872	0.0415388
A_23_P116523	NA		0.139671	0.284378	-0.327698
A_23_P116533	23075	SWAP70	0.346971	0.52157	-0.143191
A_23_P116557	3965	LGALS9	0.200934	0.362186	-0.487452
A_23_P116578	51585	PCF11	0.00240751	0.0201609	0.652217
A_23_P116587	4975	OMP	0.391508	0.563974	0.197477
A_23_P116602	57558	USP35	0.00719342	0.0407362	-1.14369
A_23_P116614	10873	ME3	0.0331669	0.108901	-0.461256
A_23_P116624	9152	SLC6A5	0.338226	0.51269	-0.240818
A_23_P11664	9295	SRSF11	0.481769	0.643748	-0.128777
A_23_P116640	79345	OR51B2	0.103009	0.231668	0.36955
A_23_P116642	65012	SLC26A10	0.0152163	0.0660809	-0.736107
A_23_P116653	79370	BCL2L14	0.532656	0.684696	0.261393
A_23_P116679	5036	PA2G4	0.400556	0.572322	-0.0567028
A_23_P116682	6601	SMARCC2	0.139694	0.284382	-0.288067
A_23_P116694	6231	RPS26	0.297824	0.471096	-0.318858
A_23_P116712	11228	RASSF8	0.1591	0.310098	-0.796028
A_23_P11674	5737	PTGFR	0.965016	0.979392	-0.0140357
A_23_P116741	9271	PIWIL1	0.180798	0.337188	0.72514
A_23_P116743	338799	LOC338799	0.00337575	0.0250554	-1.14539
A_23_P116765	3906	LALBA	0.0816424	0.197553	0.459976
A_23_P116797	60314	C12orf10	0.893634	0.936675	-0.029936
A_23_P116809	22818	COPZ1	0.287413	0.460597	0.190339
A_23_P116829	7334	UBE2N	0.0118825	0.056312	0.389789
A_23_P116840	60673	C12orf44	0.00129352	0.0137295	0.800219
A_23_P11685	5321	PLA2G4A	0.791321	0.873944	-0.0320507
A_23_P116850	3849	KRT2	0.0524826	0.147433	0.332841
A_23_P116868	53919	SLCO1C1	0.458468	0.624149	0.326096
A_23_P116872	5545	PRB4	0.0416014	0.126467	-0.423769
A_23_P116890	5544	PRB3	0.0549458	0.152349	-0.417824
A_23_P116898	2	A2M	0.297569	0.470878	-0.274544
A_23_P116902	420	ART4	0.106414	0.236534	-0.394211
A_23_P116913	121536	AEBP2	0.0239327	0.0883681	-0.753026
A_23_P116942	3902	LAG3	0.0234114	0.0870727	-0.737653
A_23_P11697	127540	HMGB4	0.330149	0.504872	-0.404161
A_23_P116980	7289	TULP3	0.013256	0.0603685	0.539501
A_23_P116999	51184	GPN3	0.0721495	0.182229	0.558622
A_23_P1170	93550	ANUBL1	0.069452	0.177701	0.218921
A_23_P117037	25875	LETMD1	0.400108	0.571922	-0.139162
A_23_P11705	55108	BSDC1	0.324927	0.499364	-0.217392
A_23_P117059	9194	SLC16A7	0.155961	0.30585	0.438484
A_23_P117068	6636	SNRPF	0.89318	0.936367	0.010593
A_23_P117082	50865	HEBP1	1.24e-05	0.00061859	-0.695745
A_23_P117095	8074	FGF23	0.599573	0.736859	-0.204057
A_23_P117104	362	AQP5	0.0204533	0.0800713	0.665467
A_23_P117125	5916	RARG	0.820401	0.893037	0.0579082
A_23_P11713	8073	PTP4A2	0.0136451	0.0614916	0.682033
A_23_P117146	11108	PRDM4	0.931376	0.959867	0.00989005
A_23_P117157	8803	SUCLA2	0.480906	0.643174	0.273905
A_23_P117163	55213	RCBTB1	0.247556	0.416966	-0.266317
A_23_P117175	143	PARP4	0.545898	0.695628	0.105135
A_23_P117190	29103	DNAJC15	0.537146	0.688283	-0.123293
A_23_P117198	78988	MRP63	0.696885	0.809138	0.0373434
A_23_P117225	2073	ERCC5	0.000661736	0.00890422	1.28099
A_23_P117238	79587	CARS2	0.00856031	0.0454981	0.81121
A_23_P117242	6541	SLC7A1	6.73e-05	0.00197602	0.75605
A_23_P117261	122042	RXFP2	0.335149	0.509738	-0.287733
A_23_P117274	4285	MIPEP	0.221062	0.386681	0.211805
A_23_P117286	1203	CLN5	0.133984	0.276854	-0.203831
A_23_P11729	51043	ZBTB7B	0.0936406	0.217104	-0.614532
A_23_P117298	2155	F7	0.0193082	0.0771048	-0.550213
A_23_P1173	3026	HABP2	0.549853	0.698662	0.207358
A_23_P117302	NA		0.162334	0.313918	0.608119
A_23_P117346	8816	DCAF5	0.0251109	0.091038	-0.610367
A_23_P117363	866	SERPINA6	0.0132547	0.0603685	-1.718
A_23_P117380	90050	FAM181A	0.698701	0.810352	-0.140132
A_23_P117387	117153	MIA2	0.0198075	0.0783784	-0.690241
A_23_P11739	83881	MIXL1	0.0956867	0.220229	-0.763361
A_23_P117411	2290	FOXG1	0.229367	0.396445	-0.370225
A_23_P117416	2972	BRF1	0.0134812	0.0610535	-0.961587
A_23_P11742	375260	WASH2P	0.0024424	0.020312	-1.05875
A_23_P117424	80344	DCAF11	0.00175336	0.0165384	-0.78516
A_23_P117437	64806	IL25	0.110507	0.242899	-0.693254
A_23_P11744	100287171	WASH1	0.0026221	0.0212463	-1.23653
A_23_P117447	55017	C14orf119	0.150024	0.298248	0.345127
A_23_P117464	122664	TPPP2	0.748698	0.844646	-0.130082
A_23_P117480	NA		0.00455175	0.0304361	0.404929
A_23_P117494	4522	MTHFD1	0.00452321	0.0303125	-0.668755
A_23_P117506	51635	DHRS7	0.652014	0.776943	0.104943
A_23_P117515	5926	ARID4A	0.303681	0.477376	0.307962
A_23_P11752	4985	OPRD1	0.881246	0.929274	-0.0852976
A_23_P117527	55030	FBXO34	0.0630961	0.166986	0.479111
A_23_P117540	6815	STYX	0.131721	0.273861	0.224696
A_23_P117546	6655	SOS2	0.837239	0.903474	0.0331317
A_23_P117558	2287	FKBP3	0.024701	0.0901175	-0.440056
A_23_P117580	957	ENTPD5	0.822282	0.894354	-0.0253619
A_23_P117582	122953	JDP2	0.000468108	0.00711255	-1.05801
A_23_P117599	10598	AHSA1	0.000429555	0.0067428	0.618945
A_23_P117602	3002	GZMB	0.363264	0.53723	-0.183771
A_23_P117623	55775	TDP1	0.219787	0.385081	-0.119711
A_23_P117635	4287	ATXN3	0.0656016	0.171158	0.615965
A_23_P11764	26523	EIF2C1	8.03e-05	0.00223583	-1.02743
A_23_P117654	4644	MYO5A	0.396765	0.569006	0.111998
A_23_P117662	3067	HDC	0.263757	0.434736	-0.38231
A_23_P117679	7782	SLC30A4	0.565755	0.711118	0.11877
A_23_P117683	25764	C15orf63	2.66e-05	0.00103801	0.579512
A_23_P117694	10391	CORO2B	0.675999	0.794313	0.126681
A_23_P117721	6218	RPS17	0.511404	0.667339	-0.279498
A_23_P117727	123263	MTFMT	0.41636	0.586867	-0.129192
A_23_P117734	145748	LYSMD4	0.00274601	0.0219589	-0.853551
A_23_P11774	51118	UTP11L	0.004806	0.0314556	0.552126
A_23_P117743	140460	ASB7	0.610241	0.745216	0.0811116
A_23_P117759	145781	GCOM1	0.0620063	0.165092	0.344872
A_23_P117767	54939	COMMD4	0.000313804	0.00551198	-0.628316
A_23_P117778	84993	UBL7	0.204719	0.366863	-0.178114
A_23_P117782	55323	LARP6	0.0214259	0.0824074	-0.4682
A_23_P117797	54982	CLN6	0.00135455	0.0141387	-0.78859
A_23_P117805	8128	ST8SIA2	0.86698	0.92153	-0.0313662
A_23_P117828	NA		0.308576	0.482665	0.26452
A_23_P117833	54893	MTMR10	0.26847	0.4401	-0.426775
A_23_P117851	594855	CPLX3	0.00226267	0.0194567	-1.42254
A_23_P117852	9768	KIAA0101	8.69e-05	0.00233075	-1.10307
A_23_P117862	56160	NDNL2	0.000980934	0.0115139	0.352962
A_23_P11787	54361	WNT4	0.00201763	0.0180774	-2.0614
A_23_P117873	1133	CHRM5	0.248288	0.417802	-0.484058
A_23_P117882	1381	CRABP1	0.0476396	0.13834	-0.498975
A_23_P117896	116179	TGM7	0.959254	0.976013	0.0203922
A_23_P117912	171177	RHOV	0.000316734	0.00554725	-1.7821
A_23_P117928	22893	BAHD1	0.00738979	0.0414759	-0.413913
A_23_P117933	2653	GCSH	0.772349	0.86134	-0.0278588
A_23_P117943	NA		0.00268081	0.0215812	0.776341
A_23_P117955	353	APRT	0.00593377	0.0359124	-0.706263
A_23_P117971	NA		0.00457825	0.0305465	-1.13663
A_23_P117980	10300	KATNB1	0.0180331	0.0736484	-0.418198
A_23_P117992	9914	ATP2C2	0.653047	0.77773	-0.136416
A_23_P118	2135	EXTL2	1.56e-05	0.000722224	0.990783
A_23_P11800	55450	CAMK2N1	0.0036586	0.026381	-0.734299
A_23_P118002	7385	UQCRC2	0.000651573	0.00882206	0.578054
A_23_P118018	283897	C16orf54	0.473505	0.637184	0.228317
A_23_P118025	64174	DPEP2	0.0456767	0.134483	0.796207
A_23_P118038	10204	NUTF2	0.00648382	0.0379998	-0.235788
A_23_P118042	55282	LRRC36	0.874976	0.925996	-0.0426035
A_23_P11806	1301	COL11A1	0.725261	0.829101	0.160923
A_23_P118061	51192	CKLF	0.0996923	0.22626	-0.348273
A_23_P118065	3294	HSD17B2	0.147533	0.294865	-0.468305
A_23_P118086	124044	SPATA2L	0.0348351	0.112478	-1.12938
A_23_P118095	6123	RPL3L	0.366028	0.539767	-0.23847
A_23_P118105	4716	NDUFB10	0.548002	0.697216	-0.112741
A_23_P118113	6650	SOLH	0.441761	0.609645	0.355249
A_23_P118122	8786	RGS11	0.0154648	0.0667781	-1.23984
A_23_P118135	NA		0.0246418	0.0899903	-0.802896
A_23_P118150	23204	ARL6IP1	0.975946	0.985926	0.00935941
A_23_P118158	9956	HS3ST2	0.570657	0.714891	0.194345
A_23_P118174	5347	PLK1	0.0489285	0.140727	-0.466472
A_23_P118185	83752	LONP2	0.113201	0.246953	-0.249581
A_23_P118195	NA		0.891923	0.935576	0.0235741
A_23_P118203	124220	ZG16B	0.0265794	0.0944945	-0.548457
A_23_P118234	221223	CES5A	0.562996	0.708756	0.308053
A_23_P118246	51659	GINS2	0.0391956	0.121385	-0.210059
A_23_P118254	2294	FOXF1	0.237152	0.405202	-0.190042
A_23_P118266	463	ZFHX3	0.220718	0.386263	-0.252179
A_23_P118289	9274	BCL7C	0.00211603	0.0186534	-0.866086
A_23_P118300	81889	FAHD1	0.0078267	0.0429923	0.76528
A_23_P118306	9093	DNAJA3	0.257461	0.427832	0.221355
A_23_P118313	11345	GABARAPL2	0.622215	0.754467	0.0757234
A_23_P118327	55623	THUMPD1	7.91e-05	0.00220809	0.808798
A_23_P118334	64282	PAPD5	0.141552	0.286975	-0.209553
A_23_P118353	6730	SRP68	0.000787919	0.0100014	0.477132
A_23_P118370	NA		0.000130325	0.00305323	-0.95007
A_23_P118392	51655	RASD1	0.022859	0.085826	0.324179
A_23_P118406	79415	C17orf62	0.000858294	0.0105348	-1.01542
A_23_P11841	493	ATP2B4	0.230798	0.398029	0.323358
A_23_P118412	283987	C17orf28	0.650234	0.775732	-0.183997
A_23_P118427	5606	MAP2K3	0.137733	0.281669	-0.406048
A_23_P11843	10446	LRRN2	0.0264128	0.0941346	-1.23733
A_23_P118435	6613	SUMO2	0.164605	0.316622	-0.304501
A_23_P118451	10948	STARD3	0.119115	0.255718	-0.346276
A_23_P118462	124641	OVCA2	0.988328	0.992964	-0.00154811
A_23_P118493	10040	TOM1L1	0.1898	0.34863	0.378722
A_23_P118516	51030	FAM18B1	0.045379	0.133902	0.380375
A_23_P118536	55106	SLFN12	0.850239	0.911129	-0.0292892
A_23_P118544	1213	CLTC	2.52e-05	0.00100977	0.32047
A_23_P118552	10614	HEXIM1	0.0121593	0.0571811	0.29132
A_23_P118571	50964	SOST	0.00665865	0.0387351	-0.918351
A_23_P118581	92591	ASB16	0.252038	0.422036	-0.227996
A_23_P11859	51478	HSD17B7	4.99e-06	0.000328656	-0.667037
A_23_P1186	389941	C1QL3	0.507938	0.664416	-0.335206
A_23_P118607	80755	AARSD1	0.00668716	0.0388293	0.622391
A_23_P118615	10351	ABCA8	0.303138	0.47687	-0.462642
A_23_P11862	55732	C1orf112	0.000370898	0.00617423	-0.465016
A_23_P118633	64847	SPATA20	2.78e-05	0.00106396	-1.13214
A_23_P118643	1977	EIF4E	0.353945	0.5287	0.191019
A_23_P118649	1977	EIF4E	0.340783	0.515309	0.181907
A_23_P118660	11056	DDX52	0.0358907	0.114595	-0.230308
A_23_P118675	3211	HOXB1	0.686693	0.801732	0.167683
A_23_P118690	7756	ZNF207	0.0254166	0.0917646	0.3606
A_23_P118693	8456	FOXN1	0.888003	0.933422	-0.0322166
A_23_P118705	6388	SDF2	0.00534541	0.033588	0.231567
A_23_P118712	85464	SSH2	0.105675	0.235353	0.177782
A_23_P118722	432	ASGR1	0.678093	0.795706	-0.0982941
A_23_P11874	9019	MPZL1	0.585516	0.726287	0.132892
A_23_P118741	201232	SLC16A13	0.0467983	0.136769	-0.598097
A_23_P118749	51009	DERL2	0.324783	0.499255	0.147894
A_23_P118774	3837	KPNB1	0.930386	0.959254	-0.0144437
A_23_P118791	84314	TMEM107	0.000947162	0.0112496	-0.639304
A_23_P118815	332	BIRC5	0.186926	0.345364	-0.371956
A_23_P118834	7153	TOP2A	0.265223	0.436573	-0.28064
A_23_P118842	83895	KRTAP1-5	0.164529	0.316565	0.270155
A_23_P118854	8688	KRT37	0.293687	0.467038	-0.349706
A_23_P118888	5048	PAFAH1B1	0.0177443	0.0730146	-0.399707
A_23_P118894	79170	PRR15L	0.00440348	0.0297593	-1.10542
A_23_P118909	56984	PSMG2	0.292515	0.465843	0.211584
A_23_P118916	80148	PQLC1	0.027152	0.0957618	-0.918593
A_23_P118946	9331	B4GALT6	0.767777	0.858248	-0.0806807
A_23_P118967	284217	LAMA1	0.000712964	0.00937209	1.82669
A_23_P119006	NA		0.979698	0.987769	0.00510718
A_23_P119015	5275	SERPINB13	0.59764	0.735471	-0.189534
A_23_P11902	NA		0.918525	0.952023	0.0163326
A_23_P119023	201475	RAB12	0.519417	0.673842	0.147819
A_23_P119040	80000	GREB1L	0.014752	0.0647246	-0.648618
A_23_P119042	4818	NKG7	0.0433764	0.129898	-0.801443
A_23_P119084	90233	ZNF551	0.295523	0.46883	0.185891
A_23_P119095	10848	PPP1R13L	0.0179085	0.0733987	-0.773343
A_23_P119102	7408	VASP	0.482333	0.644243	-0.0905411
A_23_P119130	6223	RPS19	0.0498316	0.142402	-0.639595
A_23_P119141	9817	KEAP1	0.00632808	0.0374659	-0.170216
A_23_P119143	7087	ICAM5	0.00537227	0.0336897	0.435532
A_23_P11915	54834	GDAP2	0.238286	0.406504	0.203467
A_23_P119152	NA		0.10351	0.232326	-0.469147
A_23_P119168	NA		0.624234	0.756066	-0.161607
A_23_P119196	10365	KLF2	0.51823	0.672909	-0.219597
A_23_P119202	970	CD70	1.96e-05	0.000855452	-1.37187
A_23_P119214	10469	TIMM44	0.21432	0.378703	0.306575
A_23_P11922	NA		0.00855145	0.0454584	-0.922002
A_23_P119222	56729	RETN	0.289243	0.462445	-0.274337
A_23_P119254	55723	ASF1B	8.26e-07	9.79e-05	-0.787431
A_23_P11926	NA		0.287956	0.461252	-0.231361
A_23_P119266	1777	DNASE2	0.242556	0.411334	-0.155601
A_23_P119295	51295	ECSIT	0.174613	0.329493	-0.46488
A_23_P119311	284366	KLK9	0.129642	0.271076	-0.43842
A_23_P119322	114132	SIGLEC11	0.00999199	0.0502788	-2.80699
A_23_P119337	22809	ATF5	0.0200684	0.0790854	-0.984395
A_23_P119344	8463	TEAD2	0.0035352	0.025809	-0.904014
A_23_P119353	54922	RASIP1	0.0229115	0.0859129	-0.775232
A_23_P11936	91544	UBXN11	0.541844	0.692291	-0.187158
A_23_P119362	2014	EMP3	0.939375	0.964635	-0.0174367
A_23_P119377	9266	CYTH2	0.976333	0.986148	-0.00493281
A_23_P119390	30846	EHD2	0.193324	0.353046	0.283677
A_23_P119395	2696	GIPR	0.0853839	0.203911	-0.697335
A_23_P119407	NA		0.00061771	0.00855034	-0.759719
A_23_P119418	8725	C19orf2	0.0321902	0.106684	0.434515
A_23_P119448	22870	PPP6R1	0.115907	0.251011	0.338783
A_23_P119458	8193	DPF1	0.0317728	0.105772	-0.463439
A_23_P119464	85415	RHPN2	0.0270322	0.0955035	-0.37201
A_23_P119478	10148	EBI3	1.2e-05	0.000607097	-0.929913
A_23_P119500	126282	TNFAIP8L1	0.000101399	0.00258062	-0.477538
A_23_P119502	8698	S1PR4	0.030661	0.103431	-0.688705
A_23_P119526	8943	AP3D1	0.0101749	0.0508264	0.642462
A_23_P119535	1943	EFNA2	0.134815	0.27783	-0.616894
A_23_P119543	10362	HMG20B	0.00145412	0.0147938	-1.20178
A_23_P119562	1675	CFD	0.0053851	0.0337358	-0.926479
A_23_P119573	3780	KCNN1	0.559324	0.70613	-0.258
A_23_P119583	5143	PDE4C	0.0216569	0.0830155	-1.12198
A_23_P119593	79852	EPHX3	0.862331	0.918565	-0.1095
A_23_P119611	53822	FXYD7	0.0233596	0.0869095	-0.651053
A_23_P119617	57794	SUGP1	0.0227889	0.0856525	-0.537096
A_23_P119627	51079	NDUFA13	0.000745487	0.00963587	-0.872484
A_23_P119634	11045	UPK1A	0.00479876	0.0314346	-0.31875
A_23_P119677	3191	HNRNPL	0.00260502	0.0211456	-0.502256
A_23_P11968	2980	GUCA2A	0.00356938	0.0259749	-0.618748
A_23_P119683	54531	MIER2	0.103336	0.232037	-0.777701
A_23_P119698	51293	CD320	0.000870738	0.0106409	-0.957393
A_23_P119714	29086	BABAM1	0.0158031	0.0676845	-0.514013
A_23_P119732	22835	ZFP30	0.598169	0.735838	0.0838644
A_23_P119735	22835	ZFP30	0.121561	0.259518	0.545314
A_23_P119753	23301	EHBP1	0.463671	0.628717	0.122247
A_23_P119763	64240	ABCG5	0.076967	0.190179	-0.672945
A_23_P119778	57181	SLC39A10	0.113104	0.246795	-0.390213
A_23_P119789	79134	TMEM185B	0.168136	0.321019	0.410317
A_23_P119794	NA		0.834274	0.901716	-0.0498838
A_23_P11980	100509924	LOC100509924	0.0100121	0.0503258	-0.584009
A_23_P119812	2820	GPD2	0.0301043	0.102209	-0.350395
A_23_P119835	58484	NLRC4	0.0270141	0.0954728	-0.533765
A_23_P11984	6536	SLC6A9	0.0409292	0.124951	0.791119
A_23_P119850	NA		0.137412	0.281259	0.200315
A_23_P119857	130502	TTC32	0.242849	0.41166	0.131563
A_23_P119886	2646	GCKR	0.720985	0.825801	-0.0877964
A_23_P119899	2043	EPHA4	0.370634	0.544215	-0.143323
A_23_P1199	11164	NUDT5	0.0796881	0.1945	0.16517
A_23_P119907	55139	ANKZF1	0.224808	0.39123	-0.104235
A_23_P119916	7475	WNT6	0.00104904	0.0120082	-2.26652
A_23_P119923	26504	CNNM4	0.00180722	0.01684	-0.610873
A_23_P119936	5068	REG3A	0.378736	0.551996	0.513673
A_23_P119943	3485	IGFBP2	0.0827245	0.199406	-0.673648
A_23_P11995	5052	PRDX1	0.290701	0.46389	0.153938
A_23_P119964	10153	CEBPZ	0.495148	0.654114	0.0942481
A_23_P119992	7444	VRK2	0.000261316	0.00490117	-0.405371
A_23_P120002	3431	SP110	0.0264685	0.0942386	-0.489908
A_23_P120048	29994	BAZ2B	0.228266	0.395143	-0.180532
A_23_P120056	6242	RTKN	0.0172976	0.0718033	-0.869572
A_23_P120062	6936	C2orf3	0.00556131	0.0344625	-0.486595
A_23_P12010	51093	RRNAD1	0.038842	0.120655	-0.474572
A_23_P120103	3790	KCNS3	0.00641809	0.037786	-0.589677
A_23_P120125	78989	COLEC11	0.00554453	0.0343911	-0.950196
A_23_P120146	9392	TGFBRAP1	0.00252798	0.0207981	-1.41316
A_23_P120153	284996	RNF149	0.00121067	0.0131489	-0.795954
A_23_P120170	200765	TIGD1	0.477253	0.640066	-0.0899892
A_23_P12018	23208	SYT11	0.846997	0.909224	0.0615311
A_23_P120182	4705	NDUFA10	0.00390544	0.0274842	0.421369
A_23_P120194	94101	ORMDL1	0.0704881	0.179459	0.339433
A_23_P120227	81606	LBH	3.66e-06	0.000265222	-1.25602
A_23_P120237	56910	STARD7	0.0234119	0.0870727	-0.284863
A_23_P120243	3231	HOXD1	1.87e-05	0.000825959	1.52512
A_23_P120254	56940	DUSP22	0.000721283	0.00943574	-0.887797
A_23_P120270	90411	MCFD2	0.0211462	0.081664	0.496375
A_23_P120281	10913	EDAR	0.0157135	0.0674681	-0.557333
A_23_P120316	10797	MTHFD2	0.0011019	0.0123877	0.850695
A_23_P120325	3797	KIF3C	2.29e-06	0.000194284	-1.40575
A_23_P120335	10651	MTX2	0.588429	0.728385	-0.0810827
A_23_P120345	57162	PELI1	0.278615	0.451012	-0.206374
A_23_P120354	65124	ANKRD57	0.819026	0.892236	-0.0425445
A_23_P120364	79144	PPDPF	0.0133538	0.0606722	-1.49394
A_23_P120378	NA		0.613979	0.748314	-0.172221
A_23_P120414	7529	YWHAB	0.0810997	0.196704	-0.446776
A_23_P120428	27296	TP53TG5	0.156919	0.307142	-0.218976
A_23_P120435	140686	WFDC3	0.64635	0.77283	-0.170835
A_23_P12044	55092	TMEM51	7.77e-05	0.00219183	-1.40122
A_23_P120442	8202	NCOA3	0.634637	0.763904	0.127436
A_23_P120458	55905	RNF114	0.766761	0.857538	-0.0423474
A_23_P120467	55734	ZFP64	0.109063	0.240653	0.286245
A_23_P120472	7022	TFAP2C	0.00496381	0.0321003	-0.496287
A_23_P120488	79716	NPEPL1	0.00120171	0.0131072	-1.09688
A_23_P120504	55321	C20orf46	0.00249654	0.0206242	-1.3654
A_23_P120513	128653	C20orf141	0.0247963	0.0903125	-0.980348
A_23_P12053	23013	SPEN	0.25948	0.430088	-0.0888643
A_23_P120545	164312	LRRN4	0.195624	0.355831	0.401968
A_23_P120557	55617	TASP1	2.19e-06	0.000189802	0.681458
A_23_P120566	6238	RRBP1	0.0149998	0.0655031	0.707859
A_23_P120572	54453	RIN2	0.558709	0.705636	-0.17862
A_23_P120588	140880	CST11	0.427402	0.596686	0.135489
A_23_P120594	84532	ACSS1	0.0389773	0.120892	0.463022
A_23_P1206	6229	RPS24	0.967823	0.980959	0.014073
A_23_P120606	NA		0.132458	0.27475	-0.421066
A_23_P12062	54802	TRIT1	0.013069	0.0598693	0.16718
A_23_P120629	434	ASIP	0.0403634	0.123816	-0.566786
A_23_P120644	NA		0.79212	0.874491	-0.0479135
A_23_P120660	6227	RPS21	0.892649	0.936002	-0.0579788
A_23_P120667	58494	JAM2	0.0793232	0.193888	-0.676686
A_23_P120694	9992	KCNE2	0.869976	0.923231	-0.0584351
A_23_P120710	7267	TTC3	2.75e-05	0.00105682	1.22873
A_23_P120744	8888	MCM3AP	0.00444438	0.0299261	-0.499902
A_23_P120776	6576	SLC25A1	0.00318872	0.0241748	-0.621626
A_23_P120784	27037	TRMT2A	0.0077669	0.0427889	0.466234
A_23_P12079	3749	KCNC4	0.42402	0.593771	-0.246535
A_23_P120794	6545	SLC7A4	0.0174153	0.0720757	-1.29295
A_23_P120809	2678	GGT1	0.012634	0.058537	-0.746081
A_23_P120812	3543	IGLL1	0.141957	0.287532	-0.288588
A_23_P12082	1117	CHI3L2	7.98e-06	0.000448083	0.984689
A_23_P120822	51733	UPB1	0.0426028	0.128323	0.293714
A_23_P120839	24144	TFIP11	0.51972	0.674086	0.124283
A_23_P120845	7494	XBP1	2.16e-05	0.0009093	1.12514
A_23_P120860	8508	NIPSNAP1	0.0709796	0.180245	-0.336833
A_23_P120863	9514	GAL3ST1	0.146962	0.294254	-0.539045
A_23_P120883	3162	HMOX1	0.00329819	0.0247329	-1.51442
A_23_P120899	1439	CSF2RB	0.139323	0.283839	0.453653
A_23_P120902	3957	LGALS2	0.02455	0.0898322	-0.672812
A_23_P120915	129138	ANKRD54	0.213065	0.377166	-0.32979
A_23_P120921	129138	ANKRD54	0.0132307	0.0603066	-0.457519
A_23_P120931	27350	APOBEC3C	0.111614	0.244532	-0.211131
A_23_P120933	468	ATF4	0.28836	0.461613	0.298454
A_23_P120941	468	ATF4	0.0668853	0.173366	0.947241
A_23_P120942	2547	XRCC6	0.0563421	0.15489	-0.729787
A_23_P120947	2547	XRCC6	0.156724	0.306818	0.135088
A_23_P120953	253190	SERHL2	0.0173279	0.0718707	-0.827663
A_23_P120970	25809	TTLL1	0.00282206	0.0222772	-0.700937
A_23_P120973	55007	FAM118A	0.00604476	0.0363129	-0.409848
A_23_P120982	10343	PKDREJ	0.470683	0.634574	-0.133232
A_23_P121	NA		0.0921717	0.214779	-0.551957
A_23_P121011	64651	CSRNP1	0.00783154	0.0430073	0.582465
A_23_P121013	51725	FBXO40	0.823741	0.895051	0.0434572
A_23_P121030	1370	CPN2	0.467502	0.632187	-0.0850312
A_23_P121037	50512	PODXL2	0.294145	0.467457	-2.23192
A_23_P121051	5096	PCCB	0.672715	0.791811	0.0513541
A_23_P121061	6769	STAC	0.954702	0.973362	-0.0123289
A_23_P121064	5806	PTX3	0.191929	0.351189	-0.323974
A_23_P121082	2632	GBE1	0.0982952	0.224256	-0.153995
A_23_P121095	7155	TOP2B	0.81236	0.887757	0.0260377
A_23_P121102	8820	HESX1	0.727596	0.830727	-0.0533888
A_23_P121106	8820	HESX1	0.171635	0.325426	-0.214094
A_23_P121120	53836	GPR87	0.336217	0.510798	-0.190875
A_23_P121122	80218	NAA50	0.09026	0.211788	0.276232
A_23_P12113	28982	FLVCR1	0.0600744	0.161822	-0.249991
A_23_P121141	28990	ASTE1	0.0287775	0.099308	0.380673
A_23_P121144	131375	LYZL4	0.0111624	0.0540965	-0.925654
A_23_P121182	26061	HACL1	0.605473	0.74127	0.0492223
A_23_P121196	79188	TMEM43	0.575718	0.718903	0.116837
A_23_P121215	8536	CAMK1	4.01e-06	0.000284178	-0.979299
A_23_P121222	56852	RAD18	0.0378408	0.118542	0.577312
A_23_P121234	NA		0.017718	0.0729357	-0.935599
A_23_P121250	1974	EIF4A2	0.525867	0.679121	-0.132098
A_23_P121253	8743	TNFSF10	0.000557928	0.00802634	-2.65896
A_23_P121265	11344	TWF2	0.100588	0.227701	0.222073
A_23_P121276	6787	NEK4	0.89184	0.935536	0.0186724
A_23_P12128	7252	TSHB	0.482666	0.644371	-0.146798
A_23_P121282	440955	TMEM89	0.217872	0.382701	-0.26349
A_23_P121326	11068	CYB561D2	0.0102239	0.0509829	0.991687
A_23_P121340	9942	XYLB	0.744923	0.841943	0.0547532
A_23_P121345	55171	TBCCD1	0.0106726	0.0525048	0.204917
A_23_P121356	56987	BBX	0.000582921	0.00822711	-0.751032
A_23_P121374	54437	SEMA5B	0.000575207	0.0081491	-0.95465
A_23_P121386	55081	IFT57	0.193412	0.353129	0.288296
A_23_P121396	131118	DNAJC19	0.0547225	0.151914	0.590799
A_23_P12140	6125	RPL5	0.0476903	0.13839	0.535282
A_23_P121405	29890	RBM15B	0.000524633	0.0077069	-0.556257
A_23_P121413	165721	DNAJB8	0.742367	0.840424	-0.0551052
A_23_P121423	993	CDC25A	0.256488	0.426734	-0.159269
A_23_P121441	22829	NLGN4Y	0.425094	0.594662	0.144895
A_23_P121447	84517	ARPM1	0.00551334	0.0342651	0.7299
A_23_P121459	7066	THPO	0.681557	0.798395	-0.161369
A_23_P12147	148304	C1orf74	0.0225825	0.0850858	-0.306113
A_23_P121480	4345	CD200	0.19696	0.35738	-0.373394
A_23_P121489	55773	TBC1D23	0.00377135	0.0268803	1.18342
A_23_P121499	7466	WFS1	0.00457351	0.03052	-0.772036
A_23_P121506	8603	FAM193A	0.148393	0.295898	-0.152493
A_23_P121527	51088	KLHL5	0.487516	0.648386	0.0987985
A_23_P121533	10417	SPON2	0.0753486	0.187548	-0.510081
A_23_P121545	2823	GPM6A	0.417481	0.58794	0.195889
A_23_P12155	54544	CRCT1	0.0837568	0.20112	-2.38123
A_23_P121564	2983	GUCY1B3	0.505494	0.662594	-0.177946
A_23_P121573	NA		0.00228987	0.019596	-0.580974
A_23_P121586	8916	HERC3	0.842577	0.906391	-0.0890269
A_23_P121596	5473	PPBP	0.654036	0.778502	0.0546531
A_23_P121602	8819	SAP30	0.125228	0.264684	-0.225097
A_23_P121614	4589	MUC7	0.619929	0.752508	-0.0946622
A_23_P121622	27284	SULT1B1	0.345239	0.519938	0.464145
A_23_P121637	8492	PRSS12	0.949641	0.970398	-0.0196695
A_23_P121646	10568	SLC34A2	0.581341	0.723052	-0.241283
A_23_P121657	9957	HS3ST1	0.902338	0.942166	0.0221462
A_23_P121665	57537	SORCS2	0.0169612	0.0709601	-1.95707
A_23_P121676	80319	CXXC4	0.14358	0.289733	-0.513268
A_23_P12168	5710	PSMD4	0.187232	0.345669	-0.252624
A_23_P121686	9255	AIMP1	0.442911	0.610706	-0.122
A_23_P121695	10563	CXCL13	0.928273	0.957849	-0.028349
A_23_P121702	132299	OCIAD2	0.131751	0.27391	-0.23685
A_23_P121716	306	ANXA3	0.154075	0.303368	0.292535
A_23_P121722	55714	ODZ3	0.00196456	0.0177769	-1.33271
A_23_P12173	200186	CRTC2	0.112357	0.245661	-0.473804
A_23_P121773	2483	FRG1	0.352731	0.52754	-0.206744
A_23_P12178	200186	CRTC2	0.0611548	0.163718	-0.623587
A_23_P121783	79644	SRD5A3	0.0290295	0.0997995	-0.617426
A_23_P121795	8470	SORBS2	0.000638831	0.00871616	-2.31999
A_23_P121806	58478	ENOPH1	0.572866	0.716479	0.106048
A_23_P121813	133121	ENPP6	0.822843	0.894596	-0.0435251
A_23_P121825	80006	C5orf44	0.0151726	0.0660273	0.344395
A_23_P121851	56121	PCDHB15	0.188757	0.347387	-0.336748
A_23_P121869	11042	SMA5	0.187234	0.345669	0.249478
A_23_P121875	64417	C5orf28	3.01e-05	0.00112096	0.679766
A_23_P121885	83853	ROPN1L	0.67713	0.794958	0.0510691
A_23_P12189	1676	DFFA	5.52e-05	0.0017316	-0.793665
A_23_P121898	79668	PARP8	0.0148725	0.0651328	-0.283972
A_23_P121914	1556	CYP2B7P1	0.785715	0.870493	0.124484
A_23_P121926	6414	SEPP1	0.802456	0.881371	-0.0413867
A_23_P121939	79810	PTCD2	0.0313196	0.104765	-0.655627
A_23_P121945	6620	SNCB	0.03389	0.110491	-0.916735
A_23_P121956	54974	THG1L	0.448204	0.615191	-0.0830831
A_23_P121971	NA		0.386927	0.559656	0.237743
A_23_P121976	5459	POU4F3	0.210278	0.373997	0.244311
A_23_P121987	85480	TSLP	0.809677	0.886192	-0.0472081
A_23_P12199	115572	FAM46B	0.000424593	0.00670841	-0.951416
A_23_P122001	4437	MSH3	0.275787	0.447955	-0.185917
A_23_P122007	90355	C5orf30	0.00013891	0.00319455	-0.60602
A_23_P122027	11127	KIF3A	0.357019	0.531703	-0.169683
A_23_P122041	5515	PPP2CA	0.0179286	0.0734044	0.439132
A_23_P122052	493869	GPX8	4.29e-16	1.76e-11	1.75504
A_23_P122067	114899	C1QTNF3	0.767067	0.857691	0.0489435
A_23_P122068	114899	C1QTNF3	0.0516555	0.145709	-0.25329
A_23_P122077	51301	GCNT4	0.11788	0.253985	-0.320797
A_23_P122104	285590	SH3PXD2B	0.011739	0.0558936	-0.478587
A_23_P122116	51428	DDX41	0.754039	0.8483	-0.0565621
A_23_P122127	2533	FYB	0.648342	0.774369	-0.121904
A_23_P122134	56923	NMUR2	0.649668	0.775237	-0.104232
A_23_P122144	133688	UGT3A1	0.451257	0.618078	-0.29977
A_23_P122152	27039	PKD2L2	0.0346048	0.112043	-0.678383
A_23_P122174	7518	XRCC4	0.0124647	0.0580383	0.414957
A_23_P122197	891	CCNB1	0.536833	0.688117	-0.161526
A_23_P122210	NA		0.256601	0.42687	-0.499399
A_23_P122216	4015	LOX	3.14e-11	9.03e-08	2.01535
A_23_P122228	4726	NDUFS6	0.407619	0.578444	-0.0906909
A_23_P122233	29093	MRPL22	0.5402	0.690922	0.121281
A_23_P122254	9972	NUP153	0.637633	0.766072	0.0765385
A_23_P122304	3066	HDAC2	0.0578034	0.157618	-0.237279
A_23_P12231	116983	ACAP3	0.0589492	0.159676	0.536582
A_23_P122375	60685	ZFAND3	0.0303317	0.10265	0.448749
A_23_P122387	55168	MRPS18A	0.0393114	0.121615	-0.295779
A_23_P122393	65989	DLK2	0.44337	0.611068	0.129869
A_23_P12241	55283	MCOLN3	0.277872	0.450222	-0.27523
A_23_P122414	2978	GUCA1A	0.966566	0.980144	-0.0151965
A_23_P122439	10385	BTN2A2	0.96631	0.98003	-0.00605854
A_23_P122443	3006	HIST1H1C	0.00308818	0.0236629	-1.46762
A_23_P122464	7746	ZNF193	0.00018744	0.00391694	-0.652723
A_23_P122481	NA		0.319356	0.493818	-0.403226
A_23_P122485	NA		0.285318	0.458459	-0.238858
A_23_P122493	11074	TRIM31	0.371816	0.545262	-0.277718
A_23_P122508	135656	DPCR1	0.242471	0.41124	-0.619045
A_23_P122531	50854	C6orf48	0.357111	0.531801	0.174118
A_23_P122532	57827	C6orf47	0.0160094	0.0682313	-0.665216
A_23_P122545	7936	RDBP	0.143836	0.29012	-0.331619
A_23_P122563	10471	PFDN6	0.163318	0.315122	-0.179006
A_23_P122579	1616	DAXX	0.00185087	0.0171328	-0.600936
A_23_P122582	64771	C6orf106	0.0193477	0.0772056	-1.01028
A_23_P122600	389383	C6orf126	0.777554	0.864789	0.08607
A_23_P122615	25957	PNISR	0.845403	0.908041	-0.0385359
A_23_P122624	84946	LTV1	1.75e-08	6.97e-06	0.65539
A_23_P122650	NA		0.0197919	0.0783573	-0.87498
A_23_P122655	80078	FLJ13744	0.963395	0.978569	0.0195875
A_23_P122662	54438	GFOD1	0.236999	0.405025	-0.354972
A_23_P122674	55003	PAK1IP1	4.12e-05	0.00139299	0.5787
A_23_P122688	NA		0.590648	0.729953	-0.260867
A_23_P12272	5511	PPP1R8	0.419617	0.589949	0.0828698
A_23_P122724	8875	VNN2	0.150857	0.299188	-0.50617
A_23_P122775	84816	RTN4IP1	0.0276725	0.0969443	-0.586366
A_23_P122782	6950	TCP1	0.000678886	0.0090623	1.01487
A_23_P122796	51020	HDDC2	0.83913	0.904353	-0.04743
A_23_P122805	84928	TMEM209	0.116273	0.251593	-0.234389
A_23_P122815	813	CALU	0.0158379	0.0677962	0.934487
A_23_P12282	8444	DYRK3	0.148235	0.295721	0.177908
A_23_P122852	6604	SMARCD3	0.00627933	0.0372825	-1.42299
A_23_P122863	2887	GRB10	0.0138397	0.0620206	-0.712111
A_23_P122876	6878	TAF6	0.0116483	0.0556169	-0.421399
A_23_P122896	7036	TFR2	0.467297	0.632024	-0.236322
A_23_P122906	26053	AUTS2	0.00599387	0.0361169	-0.861621
A_23_P122915	25798	BRI3	0.143179	0.289231	-0.300874
A_23_P12292	79098	C1orf116	0.0334495	0.109557	-1.02829
A_23_P122924	3624	INHBA	0.105147	0.234691	-0.391398
A_23_P122937	9844	ELMO1	0.121609	0.259538	-0.472291
A_23_P122947	23080	AVL9	0.0202995	0.0796211	0.244072
A_23_P122959	9865	TRIL	0.0659866	0.171786	-0.268289
A_23_P122976	2770	GNAI1	0.501815	0.659416	-0.0999576
A_23_P123010	9275	BCL7B	0.0113287	0.0545605	0.375476
A_23_P123015	100505599	LOC100505599	0.0137034	0.061632	-0.55562
A_23_P123018	100505599	LOC100505599	0.0160227	0.0682739	-1.4254
A_23_P123022	7532	YWHAG	0.321073	0.495596	0.142547
A_23_P12303	84871	AGBL4	0.700561	0.811476	-0.22193
A_23_P123039	11097	NUPL2	0.314437	0.488608	0.180075
A_23_P123060	3696	ITGB8	0.0185019	0.0748845	-0.791618
A_23_P123071	858	CAV2	0.770138	0.859804	-0.0642713
A_23_P123086	114796	KIAA1908	0.00028313	0.00516385	-0.668749
A_23_P123096	2792	GNGT1	0.503258	0.660488	0.535021
A_23_P123108	10142	AKAP9	0.896595	0.938843	0.0461842
A_23_P123112	5244	ABCB4	0.0395989	0.122154	-0.64663
A_23_P123125	83605	CCM2	0.00773959	0.0426784	-0.631479
A_23_P123133	4967	OGDH	0.815885	0.890064	0.0321364
A_23_P123164	89883	OR6W1P	0.0541072	0.150716	-0.687061
A_23_P123172	441295	OR2A9P	0.000445007	0.00690414	-0.696557
A_23_P123193	57180	ACTR3B	0.751215	0.846335	-0.0459654
A_23_P123228	1811	SLC26A3	0.285258	0.458425	-0.321528
A_23_P123234	NA		0.375433	0.548762	0.156576
A_23_P123242	57786	RBAK	0.00280338	0.0221889	0.395159
A_23_P123256	11333	PDAP1	0.206964	0.369723	0.228163
A_23_P123265	25870	SUMF2	7.76e-05	0.00219183	-1.05859
A_23_P123276	8323	FZD6	0.486833	0.647878	0.166302
A_23_P12329	51107	APH1A	0.283673	0.456718	0.0993997
A_23_P123308	56154	TEX15	0.344039	0.518684	0.188652
A_23_P123315	NA		0.685875	0.801234	0.0630636
A_23_P123330	6156	RPL30	0.306971	0.481017	0.31839
A_23_P123336	54704	PDP1	0.878328	0.92774	-0.032441
A_23_P123343	84955	NUDCD1	0.000457856	0.00701196	0.594356
A_23_P12336	55170	PRMT6	0.0363705	0.115519	-0.479929
A_23_P123362	NA		0.581565	0.723186	-0.222746
A_23_P123393	3786	KCNQ3	0.969706	0.982154	0.00960748
A_23_P123402	84675	TRIM55	0.580826	0.722705	-0.186425
A_23_P123413	9760	TOX	0.00685747	0.0394874	0.656773
A_23_P123424	1142	CHRNB3	0.616657	0.750125	-0.0976708
A_23_P12343	2947	GSTM3	0.000786986	0.0099958	-0.510204
A_23_P123440	11160	ERLIN2	0.333148	0.507808	-0.205959
A_23_P123448	4325	MMP16	0.0186763	0.0753102	-0.550357
A_23_P123454	79873	NUDT18	0.0267675	0.0949285	-1.09688
A_23_P123463	90459	ERI1	0.00334988	0.024931	0.598132
A_23_P123466	90459	ERI1	0.00295564	0.0229946	0.525056
A_23_P123478	5150	PDE7A	0.132031	0.274242	-0.280338
A_23_P123488	63978	PRDM14	0.401226	0.572901	-0.21581
A_23_P123503	10221	TRIB1	0.0430029	0.12911	0.561762
A_23_P123522	55199	FAM86C1	0.00729706	0.0411479	0.636822
A_23_P123539	5520	PPP2R2A	0.190011	0.348837	-0.226333
A_23_P123544	54108	CHRAC1	0.402226	0.573849	0.171272
A_23_P123555	50626	CYHR1	0.00693433	0.0397466	-1.22147
A_23_P123563	6194	RPS6	0.916976	0.951099	-0.0589904
A_23_P12357	23418	CRB1	0.279057	0.451451	-0.297146
A_23_P123578	84726	PRRC2B	0.00488395	0.031767	-0.814606
A_23_P123582	64768	IPPK	0.0169029	0.07081	0.82386
A_23_P123596	2731	GLDC	0.145163	0.291842	-0.513066
A_23_P123608	3717	JAK2	0.327961	0.502669	0.140977
A_23_P123622	4882	NPR2	0.000570239	0.00812095	-0.749842
A_23_P12363	4919	ROR1	0.103725	0.232618	0.233781
A_23_P123645	7357	UGCG	0.195825	0.355966	-0.496069
A_23_P123666	55357	TBC1D2	0.031256	0.104629	-0.378801
A_23_P123672	23424	TDRD7	1.3e-07	2.52e-05	-0.677617
A_23_P123692	11094	C9orf7	0.0396449	0.122241	-1.19582
A_23_P123704	58483	C9orf27	0.00452961	0.0303256	-0.687216
A_23_P123714	3933	LCN1	0.771451	0.860642	-0.0529184
A_23_P123727	79670	ZCCHC6	0.00277536	0.0220779	0.592335
A_23_P12373	NA		0.581452	0.72309	0.0778151
A_23_P123732	414328	C9orf103	0.00126286	0.0135153	-0.836631
A_23_P123763	79886	C9orf82	0.00904755	0.0470928	0.476622
A_23_P123794	1056	CEL	0.279397	0.451852	-0.303673
A_23_P123830	NA		0.889664	0.934234	0.0670671
A_23_P123838	NA		0.209098	0.372481	-0.551746
A_23_P123848	153090	DAB2IP	0.00111644	0.0124709	-0.945748
A_23_P123853	6363	CCL19	0.125602	0.265214	-0.318634
A_23_P12386	NA		0.057872	0.157773	-0.6627
A_23_P123866	51271	UBAP1	0.469061	0.633178	-0.159316
A_23_P123874	55234	SMU1	0.26181	0.43264	-0.134653
A_23_P123882	NA		0.137261	0.281132	-0.359899
A_23_P123905	51010	EXOSC3	0.00145493	0.0147963	0.37484
A_23_P123916	90678	LRSAM1	0.212937	0.377091	-0.371659
A_23_P12392	5788	PTPRC	0.112828	0.246362	-0.596071
A_23_P123943	7046	TGFBR1	0.270445	0.44201	-0.231384
A_23_P123974	1841	DTYMK	0.314678	0.488908	0.0654585
A_23_P123987	202052	DNAJC18	0.000211652	0.00424339	0.814883
A_23_P124003	22953	P2RX2	0.671535	0.791155	-0.103099
A_23_P124022	84246	MED10	0.000976919	0.0114833	0.790423
A_23_P124024	84246	MED10	0.0101972	0.0508888	1.56654
A_23_P124035	64928	MRPL14	0.23277	0.400166	-0.2883
A_23_P124044	10522	DEAF1	0.00292066	0.0227959	-1.0104
A_23_P12405	83715	ESPN	0.145444	0.292214	-0.603824
A_23_P124078	NA		0.16733	0.320017	-0.365265
A_23_P124084	4016	LOXL1	0.622997	0.75517	-0.0817334
A_23_P124095	51806	CALML5	0.00338765	0.0250954	-1.04154
A_23_P124108	3684	ITGAM	0.531075	0.683344	0.640464
A_23_P124122	5827	PXMP2	0.0446328	0.132422	-0.292104
A_23_P124132	79701	C17orf101	0.108349	0.239568	-0.430761
A_23_P124164	57461	ISY1	0.0252854	0.0914052	0.380266
A_23_P124177	NA		0.756524	0.850213	-0.0578972
A_23_P124190	53840	TRIM34	0.0648559	0.169834	-0.725428
A_23_P124202	84289	ING5	0.0626857	0.166307	0.306942
A_23_P124224	1659	DHX8	0.0929657	0.216037	-0.297642
A_23_P12423	23400	ATP13A2	0.130229	0.271891	-0.482773
A_23_P124232	117154	DACH2	0.0963986	0.2214	-0.501299
A_23_P124252	57118	CAMK1D	0.0150762	0.0657299	-0.921308
A_23_P124300	53630	BCMO1	0.0514495	0.145328	-0.35874
A_23_P124313	51319	RSRC1	0.0145786	0.0641816	0.425067
A_23_P124327	64324	NSD1	0.0131789	0.060171	-0.905969
A_23_P124335	440712	C1orf186	0.0090752	0.0471888	-0.663946
A_23_P124343	NA		0.724578	0.828549	-0.128353
A_23_P12435	4660	PPP1R12B	0.650539	0.775961	0.279315
A_23_P124356	NA		0.148198	0.29568	-0.346702
A_23_P124358	NA		0.0229931	0.0860401	-0.783337
A_23_P124377	NA		0.556311	0.703865	0.0729067
A_23_P124384	6474	SHOX2	1.04e-08	4.74e-06	1.46503
A_23_P124402	170572	HTR3C	0.337302	0.511801	0.570014
A_23_P124417	699	BUB1	0.497636	0.656158	-0.0856403
A_23_P124427	4750	NEK1	0.177673	0.333245	0.263652
A_23_P124438	255403	ZNF718	0.0509438	0.144406	-0.683022
A_23_P124456	5144	PDE4D	0.00155186	0.015339	-0.721438
A_23_P124476	1182	CLCN3	0.276168	0.448326	-0.200118
A_23_P124486	5780	PTPN9	0.574231	0.717701	0.103053
A_23_P124514	1740	DLG2	0.513228	0.668709	0.474669
A_23_P124522	79877	DCAKD	0.00214657	0.0188054	-1.50082
A_23_P124534	59350	RXFP1	0.109203	0.240871	0.237275
A_23_P124542	1380	CR2	0.00359679	0.0260914	-0.673362
A_23_P124559	83463	MXD3	9.37e-05	0.00245068	-1.11092
A_23_P124570	2241	FER	0.00159882	0.0156047	0.589373
A_23_P124585	81931	ZNF93	0.343513	0.518272	-0.260818
A_23_P124619	57402	S100A14	0.00821585	0.0442816	-0.664449
A_23_P12463	5768	QSOX1	0.0606629	0.162827	-0.712759
A_23_P124632	3493	IGHA1	0.327614	0.502362	-0.145673
A_23_P124642	10125	RASGRP1	9.83e-06	0.00052572	-0.768049
A_23_P124661	11273	ATXN2L	0.0549899	0.15245	-0.560822
A_23_P124699	NA		0.375418	0.548762	0.44497
A_23_P124733	27235	COQ2	0.510417	0.666404	-0.127886
A_23_P124742	1119	CHKA	0.0428258	0.128766	-0.411625
A_23_P124760	9862	MED24	0.167424	0.320031	-0.228593
A_23_P12477	22955	SCMH1	0.0774459	0.190902	-0.277519
A_23_P1248	54838	C10orf26	0.676209	0.794379	-0.0483892
A_23_P124805	54832	VPS13C	0.00942833	0.0483504	-0.880193
A_23_P124823	NA		0.0484674	0.139916	0.369841
A_23_P124837	4035	LRP1	0.0383643	0.11966	-0.684078
A_23_P124855	84186	ZCCHC7	0.000773011	0.0098795	1.09162
A_23_P124892	3814	KISS1	0.331365	0.506109	0.339072
A_23_P124905	4884	NPTX1	0.00159344	0.0155879	1.20147
A_23_P124912	9520	NPEPPS	0.000340777	0.00583864	-1.12804
A_23_P124927	10636	RGS14	0.00168992	0.0161406	-0.476031
A_23_P124934	10320	IKZF1	0.0453848	0.133906	-0.688574
A_23_P124946	202333	CMYA5	0.0099384	0.0501195	-0.426924
A_23_P124962	23625	FAM89B	0.5366	0.687948	-0.142686
A_23_P124977	NA		0.272235	0.443873	-0.309588
A_23_P124988	23415	KCNH4	0.0507676	0.144047	-0.880627
A_23_P125001	5881	RAC3	0.00107076	0.0121577	-0.84965
A_23_P125016	NA		0.0711825	0.180655	0.335721
A_23_P12503	55746	NUP133	0.733758	0.834649	-0.024267
A_23_P125033	9196	KCNAB3	0.515705	0.67066	-0.156307
A_23_P125042	7673	ZNF222	0.000413106	0.00660325	1.20751
A_23_P125056	575	BAI1	0.0535867	0.149653	-0.580483
A_23_P125067	2554	GABRA1	0.126456	0.266484	-0.880982
A_23_P125078	284129	SLC26A11	0.0407449	0.124593	-0.492989
A_23_P125082	3660	IRF2	0.435911	0.604142	0.130972
A_23_P125107	3106	HLA-B	0.0865406	0.205689	-0.409226
A_23_P125109	NA		0.00653563	0.0381921	-0.637996
A_23_P125117	200942	KLHDC8B	0.000903882	0.0108901	-1.09773
A_23_P12514	389	RHOC	0.000874169	0.010658	-0.844578
A_23_P125147	9364	RAB28	0.0013257	0.0139475	0.525585
A_23_P125157	84901	NFATC2IP	0.00389178	0.0274234	-0.395075
A_23_P125164	2272	FHIT	0.0213552	0.0822235	-0.768563
A_23_P125171	2272	FHIT	0.000538832	0.00786196	-0.84931
A_23_P125176	NA		0.83927	0.904401	0.0794743
A_23_P125204	219869	OR10G8	0.235705	0.403536	-0.515531
A_23_P125233	1264	CNN1	0.340736	0.515276	-0.259674
A_23_P125253	9079	LDB2	0.0716665	0.181502	-0.672142
A_23_P12526	7159	TP53BP2	0.696627	0.808914	0.0522934
A_23_P125265	3838	KPNA2	0.112	0.24513	-0.369191
A_23_P125278	6373	CXCL11	0.0872893	0.206955	-0.551974
A_23_P125286	23538	OR52A1	0.831274	0.899861	-0.0522231
A_23_P125303	3547	IGSF1	0.0614015	0.164122	-0.555088
A_23_P12533	91074	ANKRD30A	0.175366	0.330484	0.338954
A_23_P125348	58485	TRAPPC1	0.678026	0.795669	-0.154203
A_23_P125383	23671	TMEFF2	0.581662	0.723219	-0.185873
A_23_P1254	9446	GSTO1	0.810931	0.886997	-0.0120725
A_23_P125408	83475	DOHH	0.350004	0.524755	-0.250977
A_23_P125420	521	ATP5I	0.0251883	0.0911891	-0.373422
A_23_P125423	715	C1R	8.62e-06	0.000475941	-1.55937
A_23_P125435	2560	GABRB1	0.121574	0.259518	-0.633878
A_23_P125451	5788	PTPRC	0.123846	0.262643	-0.426832
A_23_P125475	55879	GABRQ	0.092864	0.215893	0.384452
A_23_P12549	54518	APBB1IP	0.173299	0.327749	-0.426557
A_23_P125495	1038	CDR1	0.0478138	0.138594	-0.652019
A_23_P125505	5475	PPEF1	0.0907131	0.212528	0.302825
A_23_P125519	6191	RPS4X	0.423048	0.59293	-0.243992
A_23_P125533	89801	PPP1R3F	0.129713	0.271148	-0.25897
A_23_P12554	9033	PKD2L1	0.292286	0.465633	-0.404806
A_23_P125541	89801	PPP1R3F	0.187373	0.34586	-0.402753
A_23_P125553	474343	SPIN2B	0.0900164	0.211439	-0.310927
A_23_P125579	58526	MID1IP1	0.865106	0.920463	-0.0422474
[truncated: 39,001 more rows]

## Sheet: ABT888
ProbeID	EntrezGeneID	GeneSymbol	pvalue	FDR	Fold Change (log2 signed ratio)
A_23_P100001	400451	FAM174B	0.00699646	0.033065	-0.879311
A_23_P100011	10239	AP3S2	0.00505579	0.0280839	-0.346929
A_23_P100022	9899	SV2B	0.0535485	0.120505	0.81771
A_23_P100056	348093	RBPMS2	0.142718	0.242257	0.318059
A_23_P100074	57099	AVEN	0.0150261	0.0515756	-0.387213
A_23_P100092	146050	ZSCAN29	0.732733	0.807321	0.0585469
A_23_P100103	23339	VPS39	0.00287261	0.0214335	-0.387662
A_23_P100111	11261	CHP	0.000848364	0.0143376	-0.643457
A_23_P100127	57082	CASC5	0.0190561	0.0600029	-0.80146
A_23_P100133	23300	ATMIN	6.92e-05	0.00804425	-0.318049
A_23_P100141	64718	UNKL	0.00398118	0.0249296	-0.788439
A_23_P100156	55654	TMEM127	0.000503548	0.013472	-0.603197
A_23_P100177	4324	MMP15	0.835167	0.88526	0.0587758
A_23_P100189	5619	PRM1	0.561857	0.665227	-0.0788859
A_23_P100196	9100	USP10	0.0691212	0.144161	0.13133
A_23_P100203	3281	HSBP1	0.439801	0.556949	-0.0609098
A_23_P100220	80004	ESRP2	0.162851	0.266756	0.291521
A_23_P100240	1014	CDH16	0.0626385	0.134481	0.582794
A_23_P10025	4753	NELL2	0.0142879	0.049932	0.516334
A_23_P100263	80790	CMIP	0.0187763	0.0594183	-0.856091
A_23_P100278	2903	GRIN2A	0.0256983	0.0727776	0.218181
A_23_P100292	90850	ZNF598	0.0011804	0.0156776	1.01241
A_23_P100315	26063	DECR2	0.0298751	0.0804149	-0.468131
A_23_P100326	8131	NPRL3	0.233151	0.346951	0.129052
A_23_P100341	23594	ORC6	0.289423	0.406995	0.0832254
A_23_P100344	23594	ORC6	0.17241	0.278145	-0.225434
A_23_P100355	5531	PPP4C	0.320832	0.438646	-0.210122
A_23_P100386	146433	IL34	0.415883	0.5333	-0.0956461
A_23_P100392	6923	TCEB2	0.0121897	0.0453765	-0.428418
A_23_P100408	4917	NTN3	0.0509198	0.116398	-0.28501
A_23_P100413	118460	EXOSC6	0.00128856	0.0159849	-0.722032
A_23_P100420	23174	ZCCHC14	0.000388717	0.0131484	0.535693
A_23_P100441	80011	FAM192A	0.740899	0.813652	0.04883
A_23_P100455	64779	MTHFSD	0.0728006	0.149817	-0.556409
A_23_P100469	54957	TXNL4B	0.0137963	0.0487683	-0.245644
A_23_P100478	84148	KAT8	0.000797151	0.014279	-0.417722
A_23_P100486	79001	VKORC1	0.0038721	0.0245914	-0.537615
A_23_P100499	79641	ROGDI	0.897058	0.929547	0.0232132
A_23_P100501	3163	HMOX2	0.000519622	0.0135109	-1.06597
A_23_P100517	124491	TMEM170A	0.904233	0.934287	0.0168942
A_23_P100522	NA		0.000790562	0.0142696	-0.655193
A_23_P100539	368	ABCC6	0.708863	0.788395	-0.0307325
A_23_P100556	23265	EXOC7	0.00298733	0.0217666	-0.392976
A_23_P100576	5691	PSMB3	0.000885498	0.0145611	-0.445596
A_23_P100583	4025	LPO	0.797354	0.85655	0.0367123
A_23_P100595	NA		0.149945	0.251206	-0.358722
A_23_P10060	NA		0.387655	0.506291	0.0782781
A_23_P100602	6904	TBCD	0.0196232	0.0611527	-0.432167
A_23_P10062	25834	MGAT4C	0.34413	0.462404	0.173586
A_23_P100632	51155	HN1	0.00227987	0.0194669	-0.734543
A_23_P100642	5409	PNMT	0.0434867	0.104084	-0.450011
A_23_P100654	57659	ZBTB4	0.0906848	0.174648	0.144242
A_23_P100660	5176	SERPINF1	0.317376	0.435067	-0.161738
A_23_P100676	23293	SMG6	0.0418978	0.101598	-0.866234
A_23_P100693	9931	HELZ	0.00388201	0.0246228	0.405695
A_23_P100704	5598	MAPK7	0.892444	0.926382	0.0205268
A_23_P100711	5376	PMP22	0.631018	0.724516	-0.0376692
A_23_P100730	8631	SKAP1	0.0532886	0.120098	0.738012
A_23_P100754	64750	SMURF2	0.0978298	0.184305	0.208138
A_23_P100764	51629	SLC25A39	0.0047887	0.0273004	-0.713959
A_23_P10077	57104	PNPLA2	0.0349288	0.0894355	-1.04196
A_23_P100779	7343	UBTF	0.812831	0.867911	-0.0492748
A_23_P100788	6777	STAT5B	0.00111258	0.0154487	-0.529627
A_23_P100795	6774	STAT3	0.285724	0.403023	-0.0927991
A_23_P100802	28958	CCDC56	0.00102979	0.0152562	-0.571178
A_23_P10081	200894	ARL13B	0.0105616	0.0417578	0.611665
A_23_P100868	80179	MYO19	0.0644931	0.137329	-0.344143
A_23_P100872	3213	HOXB3	0.785464	0.847564	0.0255462
A_23_P100883	23512	SUZ12	0.00132877	0.0160897	0.661898
A_23_P10091	NA		0.355346	0.473549	0.237042
A_23_P100912	28964	GIT1	0.0770604	0.155816	-0.698706
A_23_P100931	23746	AIPL1	0.167737	0.272682	0.212998
A_23_P100935	23746	AIPL1	0.90875	0.937563	-0.0206758
A_23_P100959	124961	ZFP3	0.130136	0.226547	1.36975
A_23_P100963	201305	SPNS3	0.0285469	0.0779651	-0.770441
A_23_P100990	8687	KRT38	0.336241	0.454379	0.160384
A_23_P100991	8687	KRT38	0.0193566	0.0606511	0.663808
A_23_P101007	147111	NOTUM	0.294775	0.412371	0.430879
A_23_P101013	11322	TMC6	0.0347345	0.0891074	-0.41675
A_23_P101025	654346	LGALS9C	0.0407777	0.0996719	-0.735234
A_23_P101038	83900	KRTAP9-3	0.11446	0.20644	-0.293489
A_23_P101048	83897	KRTAP3-2	0.32313	0.441053	-0.141351
A_23_P101054	3885	KRT34	0.150193	0.25156	-0.550655
A_23_P101073	8387	OR1E1	0.296361	0.413746	0.174837
A_23_P101084	84690	SPATA22	0.0338296	0.0875056	0.305123
A_23_P101093	51226	COPZ2	0.00520148	0.0283924	-0.411465
A_23_P101111	9150	CTDP1	0.0398735	0.0982106	-0.432866
A_23_P101121	NA		0.0887036	0.171947	-0.338062
A_23_P101131	2922	GRP	0.974512	0.982782	0.00376489
A_23_P101141	54941	RNF125	0.0439295	0.104822	-0.458092
A_23_P101185	4677	NARS	0.000556787	0.0136786	0.844196
A_23_P101193	4645	MYO5B	0.452859	0.568848	0.0409709
A_23_P101208	1528	CYB5A	0.0517679	0.117726	0.282297
A_23_P10121	6422	SFRP1	0.718979	0.79619	0.0502232
A_23_P101237	83608	C18orf21	0.100439	0.187831	-0.225537
A_23_P101240	147645	VSIG10L	0.0519184	0.118029	1.24496
A_23_P101246	147645	VSIG10L	0.881511	0.918311	0.0247133
A_23_P101253	80110	ZNF614	0.351339	0.469322	0.125322
A_23_P101258	80110	ZNF614	0.00932484	0.038708	0.283264
A_23_P10127	6422	SFRP1	0.000560472	0.0136786	0.747599
A_23_P101272	55663	ZNF446	0.0417545	0.101358	-0.430969
A_23_P101281	84914	ZNF587	0.0400981	0.0985389	-0.534966
A_23_P101297	24139	EML2	2.77e-09	1.14e-05	-1.20913
A_23_P101303	284352	LRRC68	0.03811	0.0951112	-0.799362
A_23_P101308	284352	LRRC68	0.0396755	0.0978757	-0.82864
A_23_P101319	26974	ZNF285	0.883456	0.91987	0.021546
A_23_P101321	9138	ARHGEF1	0.113483	0.205196	-0.333491
A_23_P101332	65095	KRI1	0.00222244	0.0193051	-1.09577
A_23_P101342	84971	ATG4D	0.0425287	0.102581	-0.424124
A_23_P10135	28511	NKIRAS2	0.00944082	0.0390471	-0.581065
A_23_P101351	79088	ZNF426	0.0141029	0.0494804	-0.378802
A_23_P101374	29785	CYP2S1	0.450729	0.567161	-0.224452
A_23_P101380	374907	B3GNT8	0.043202	0.103663	0.506437
A_23_P101392	79041	TMEM38A	0.00255282	0.0203511	-0.81475
A_23_P1014	84791	C1orf97	0.699726	0.780583	-0.0343712
A_23_P101407	718	C3	0.449377	0.565792	-0.11886
A_23_P101427	115704	EVI5L	0.0719304	0.148415	-0.486527
A_23_P101434	91662	NLRP12	0.307107	0.424596	-0.204319
A_23_P101461	81576	CCDC130	0.00125873	0.0158643	-0.350904
A_23_P101476	79973	ZNF442	0.0146996	0.0508851	0.425987
A_23_P101480	22983	MAST1	0.228963	0.342472	-0.18727
A_23_P101505	11012	KLK11	0.896952	0.929461	0.0170347
A_23_P101516	3748	KCNC3	0.604976	0.702126	0.0551114
A_23_P101521	126123	IZUMO2	0.20266	0.31277	0.128466
A_23_P101532	6205	RPS11	0.0707108	0.146569	-0.755236
A_23_P101551	587	BCAT2	0.00128945	0.0159849	-0.784465
A_23_P10156	79643	CHMP6	0.00728323	0.0337644	-0.974765
A_23_P101564	26291	FGF21	0.7014	0.782067	0.0606818
A_23_P101573	171169	SPACA4	0.163813	0.267828	0.172354
A_23_P101615	147929	ZNF565	0.130529	0.227026	0.126942
A_23_P101623	63934	ZNF667	0.0200259	0.0620136	0.527234
A_23_P101636	3812	KIR3DL2	0.347041	0.465051	-0.186474
A_23_P101642	5794	PTPRH	0.350387	0.468385	-0.139961
A_23_P101655	81	ACTN4	0.0141174	0.0495093	-0.947613
A_23_P101671	85300	ATCAY	0.323537	0.441329	-0.162906
A_23_P101683	1178	CLC	0.21797	0.329892	-0.188386
A_23_P101699	84717	HDGFRP2	0.00698981	0.0330576	-0.62687
A_23_P101707	10226	PLIN3	0.0117628	0.0444658	-0.392388
A_23_P10172	29122	PRSS50	0.0887695	0.172026	0.478855
A_23_P101737	84444	DOT1L	0.0201311	0.0622167	-0.950604
A_23_P101742	116541	MRPL54	0.00114463	0.0156045	-0.611566
A_23_P101759	2527	FUT5	0.00066926	0.0138072	-0.912535
A_23_P101761	84634	KISS1R	0.0315235	0.0835275	-0.51974
A_23_P101774	6528	SLC5A5	0.591385	0.6903	0.0761639
A_23_P101783	3594	IL12RB1	0.65306	0.743185	0.0736312
A_23_P101796	85360	SYDE1	0.121486	0.215416	-0.158685
A_23_P101806	3249	HPN	0.594557	0.693134	-0.104667
A_23_P101811	7561	ZNF14	0.0022083	0.0192872	0.427561
A_23_P10182	8309	ACOX2	0.314249	0.431877	0.174197
A_23_P101829	9170	LPAR2	0.000686152	0.0138607	-0.933119
A_23_P101871	115290	FBXO17	0.0315793	0.0836434	-0.297415
A_23_P101893	84467	FBN3	0.0184757	0.0588162	-0.365008
A_23_P101905	10297	APC2	0.443064	0.559786	0.158497
A_23_P101908	10297	APC2	0.0891247	0.172559	0.462336
A_23_P10194	26470	SEZ6L2	0.00648949	0.031876	-0.760841
A_23_P101943	26225	ARL5A	0.00167771	0.0174231	0.51683
A_23_P101950	4190	MDH1	0.00185265	0.0180306	1.14958
A_23_P101960	678	ZFP36L2	0.119715	0.212979	-0.401951
A_23_P101972	92291	CAPN13	0.324782	0.44263	0.110447
A_23_P101992	8685	MARCO	0.526044	0.634216	0.107607
A_23_P102000	7852	CXCR4	0.155898	0.258088	0.211343
A_23_P102017	57471	ERMN	0.212682	0.323874	0.247566
A_23_P102037	80219	COQ10B	0.224852	0.337616	-0.14582
A_23_P102058	4148	MATN3	0.147363	0.24797	0.325555
A_23_P10206	3037	HAS2	0.028027	0.0769881	0.228788
A_23_P102060	6744	SSFA2	0.00281781	0.0212138	1.38062
A_23_P102071	NA		0.962631	0.974948	-0.00445942
A_23_P102083	66037	BOLL	0.670597	0.757549	0.0574291
A_23_P102109	7277	TUBA4A	0.00251338	0.0202175	-1.2627
A_23_P10211	114134	SLC2A13	0.0546824	0.122316	0.228485
A_23_P102113	80326	WNT10A	0.0404544	0.0991438	-0.510448
A_23_P102117	80326	WNT10A	0.052845	0.11942	-0.450026
A_23_P102122	10109	ARPC2	0.000664804	0.0138039	-0.424919
A_23_P102160	151393	FAM82A1	0.000345908	0.0127492	1.03258
A_23_P102172	130749	CPO	0.0695131	0.144822	-0.358315
A_23_P102183	NA		0.137621	0.235898	-0.184977
A_23_P102192	9448	MAP4K4	0.145653	0.245837	-0.187078
A_23_P102202	2956	MSH6	0.000941522	0.0148128	0.946311
A_23_P102235	6637	SNRPG	0.00191123	0.0181803	0.798706
A_23_P102242	64844	2007-03-01	0.0194156	0.0607556	0.418975
A_23_P102258	116540	MRPL53	0.0022102	0.0192887	-0.290649
A_23_P102262	9801	MRPL19	0.00657054	0.0320767	0.621871
A_23_P102278	57628	DPP10	0.145197	0.245265	1.14705
A_23_P102286	3973	LHCGR	0.805096	0.86246	0.0416535
A_23_P10232	55024	BANK1	0.02037	0.0627011	1.24669
A_23_P102320	129401	NUP35	0.0023848	0.0197369	0.670485
A_23_P102331	6332	SCN7A	0.196505	0.305787	0.404699
A_23_P102351	9486	CHST10	0.00136286	0.016234	-0.561472
A_23_P102364	25791	NGEF	0.245369	0.360461	0.126115
A_23_P102391	30061	SLC40A1	0.000897028	0.01461	1.03178
A_23_P102404	10574	CCT7	0.00313587	0.0222487	-0.366542
A_23_P102412	65977	PLEKHA3	0.000846943	0.0143376	1.16442
A_23_P102420	10575	CCT4	0.325702	0.443588	0.231758
A_23_P102439	431705	ASTL	0.000912611	0.014672	-0.585873
A_23_P102454	51141	INSIG2	0.0123147	0.0456664	0.529444
A_23_P102462	129804	FBLN7	0.118495	0.211525	-0.320915
A_23_P102471	4436	MSH2	0.0016576	0.0173604	1.00868
A_23_P102481	1493	CTLA4	0.198455	0.307973	0.325209
A_23_P102494	54978	C2orf18	0.0163292	0.0543027	-0.858757
A_23_P102508	8884	SLC5A6	0.0248111	0.0711739	-0.335509
A_23_P102517	5147	PDE6D	0.0163867	0.054445	-0.256459
A_23_P102523	6711	SPTBN1	0.159831	0.262996	-0.153476
A_23_P102542	54812	AFTPH	0.00229727	0.019533	0.997004
A_23_P102551	7851	MALL	0.000106664	0.00932458	-0.854055
A_23_P102571	56731	SLC2A4RG	0.828243	0.880105	-0.0402727
A_23_P102575	56731	SLC2A4RG	0.934682	0.955684	-0.0148948
A_23_P102582	55969	C20orf24	0.00863361	0.0371669	0.422958
A_23_P102607	84181	CHD6	0.0249171	0.0713658	0.296554
A_23_P102611	8839	WISP2	0.431085	0.548505	0.140514
A_23_P102622	8785	MATN4	0.00169659	0.0175286	-0.706537
A_23_P102634	140870	WFDC6	0.678058	0.763497	-0.0959444
A_23_P102681	79160	MGC4294	0.18899	0.297381	-0.30904
A_23_P102694	140881	DEFB129	0.308386	0.425977	0.312925
A_23_P102706	9751	SNPH	0.0202893	0.06256	-0.92353
A_23_P102731	54498	SMOX	0.147359	0.24797	-0.346212
A_23_P102743	51605	TRMT6	0.00322607	0.0225062	-0.426634
A_23_P102759	22903	BTBD3	0.624017	0.718348	0.0371142
A_23_P102769	92667	C20orf72	0.0354622	0.0903637	-0.232197
A_23_P102770	51126	NAA20	0.0367252	0.0925865	0.240278
A_23_P102816	NA		0.0111605	0.0431394	-0.572169
A_23_P102832	11190	CEP250	0.0114426	0.0438168	-0.703664
A_23_P102842	9054	NFS1	0.0688491	0.14386	0.175374
A_23_P102864	5651	TMPRSS15	0.422379	0.539891	0.422948
A_23_P102876	10694	CCT8	0.803066	0.860758	-0.0255833
A_23_P102884	8867	SYNJ1	0.00691163	0.0329386	-0.339197
A_23_P102890	64968	MRPS6	0.0429734	0.103301	0.234199
A_23_P1029	4237	MFAP2	0.484532	0.59759	-0.0830854
A_23_P10291	1510	CTSE	0.69358	0.775753	-0.0565211
A_23_P102917	10317	B3GALT5	0.817496	0.871531	-0.0295287
A_23_P102919	10317	B3GALT5	0.117628	0.210371	-0.295688
A_23_P102925	5822	PWP2	0.00444223	0.0263233	-0.674165
A_23_P102937	6612	SUMO3	0.000896095	0.01461	0.517537
A_23_P102950	89765	RSPH1	0.0501645	0.115185	0.621521
A_23_P102965	23786	BCL2L13	0.251733	0.367546	0.110158
A_23_P102973	8220	DGCR14	0.0160332	0.0537447	-0.700746
A_23_P102988	10587	TXNRD2	0.0295945	0.0799124	-0.4316
A_23_P102994	5297	PI4KA	0.0166472	0.0549945	-0.31558
A_23_P103011	9609	RAB36	0.300185	0.417624	-0.28554
A_23_P103034	1413	CRYBA4	0.000572501	0.0137182	0.34382
A_23_P103041	10634	GAS2L1	0.250477	0.366123	-0.182888
A_23_P10305	56474	CTPS2	0.534481	0.641315	-0.0559204
A_23_P103062	91445	RNF185	0.521044	0.629929	-0.0777944
A_23_P103070	7533	YWHAH	0.381628	0.500338	0.126
A_23_P103084	10043	TOM1	0.00929713	0.0386493	-0.445229
A_23_P103099	23543	RBFOX2	0.00278266	0.0211081	-0.292762
A_23_P103104	4242	MFNG	0.00451432	0.0265244	-0.896416
A_23_P103110	23764	MAFF	0.279744	0.397157	-0.150248
A_23_P103120	9567	GTPBP1	0.00778346	0.0350645	-0.383178
A_23_P103131	54471	SMCR7L	0.0148786	0.0512469	0.368265
A_23_P103149	50	ACO2	0.0475005	0.11078	-0.20977
A_23_P103172	127253	TYW3	0.840896	0.889447	0.0277594
A_23_P103180	127253	TYW3	0.344673	0.462891	-0.126234
A_23_P103201	55629	PNRC2	0.00218801	0.0192219	0.53345
A_23_P103226	2166	FAAH	0.0240499	0.0697247	-0.838838
A_23_P103232	54935	DUSP23	0.0335336	0.087001	-0.170215
A_23_P103248	93183	PIGM	0.164684	0.268962	0.121779
A_23_P103256	10878	CFHR3	0.250091	0.365798	0.202928
A_23_P103269	NA		0.0300772	0.0808499	-0.379194
A_23_P103276	112970	KTI12	0.0725286	0.149423	0.187005
A_23_P103282	9528	TMEM59	0.00945197	0.039063	0.480535
A_23_P103310	6278	S100A7	0.40149	0.519769	0.218895
A_23_P103315	353131	LCE1A	0.00186226	0.0180306	-1.21031
A_23_P103328	5733	PTGER3	0.000558893	0.0136786	0.525607
A_23_P103334	149041	RC3H1	0.00788314	0.0352976	-0.522946
A_23_P103349	10896	OCLM	0.250113	0.365806	-0.194952
A_23_P103361	3932	LCK	0.143171	0.242834	-0.187522
A_23_P103371	113451	ADC	0.0489606	0.113247	-0.284608
A_23_P103398	5664	PSEN2	0.0724851	0.149349	-0.347954
A_23_P103405	NA		0.0237471	0.0691893	0.47673
A_23_P103414	51441	YTHDF2	0.00464622	0.0268955	0.500718
A_23_P103424	85397	RGS8	0.731149	0.806053	0.0540743
A_23_P103433	127700	OSCP1	0.394315	0.512859	-0.157237
A_23_P103442	64769	MEAF6	0.0038392	0.0244573	0.608324
A_23_P103454	84224	NBPF3	0.0115426	0.044027	0.487811
A_23_P103465	5322	PLA2G5	0.19353	0.302507	-0.180573
A_23_P103476	29914	UBIAD1	0.784317	0.846905	-0.0244315
A_23_P103486	1573	CYP2J2	0.778455	0.842619	0.0353201
A_23_P103496	115361	GBP4	0.115629	0.207929	-0.347223
A_23_P103503	4194	MDM4	0.743984	0.816078	-0.0287659
A_23_P103511	400793	C1orf226	0.0628695	0.134816	0.312786
A_23_P103522	6402	SELL	0.182606	0.289862	0.149799
A_23_P103532	23432	GPR161	0.517413	0.626649	0.168127
A_23_P10356	10863	ADAM28	0.0570694	0.126073	0.510907
A_23_P103561	89796	NAV1	0.0147207	0.0509303	-0.696899
A_23_P103571	10905	MAN1A2	0.323239	0.441142	0.116253
A_23_P103588	3158	HMGCS2	0.920696	0.946017	0.0167983
A_23_P103601	57134	MAN1C1	0.0030303	0.0218908	0.524162
A_23_P103617	8416	ANXA9	0.155118	0.257134	-0.231461
A_23_P103628	55127	HEATR1	0.00838266	0.0365588	0.206965
A_23_P103631	10969	EBNA1BP2	0.0478128	0.111313	0.266794
A_23_P103661	55249	YY1AP1	0.110368	0.201231	-0.163189
A_23_P103672	10763	NES	0.0647532	0.137694	-0.376886
A_23_P103690	10712	FAM189B	0.0688534	0.14386	-0.312675
A_23_P103698	28956	LAMTOR2	0.0022494	0.0193791	-0.738187
A_23_P103703	27129	HSPB7	0.554754	0.65924	0.0866808
A_23_P103720	79814	AGMAT	0.0422362	0.102116	-0.366163
A_23_P10374	22864	R3HDM2	0.790312	0.850944	0.0229553
A_23_P103743	NA		0.407347	0.525427	0.144377
A_23_P103756	5016	OVGP1	0.102231	0.190317	-0.325784
A_23_P103765	2205	FCER1A	0.937427	0.957463	0.0280896
A_23_P103775	84230	LRRC8C	0.00431201	0.0259037	0.55896
A_23_P103787	204851	HIPK1	0.0971426	0.183441	-0.427017
A_23_P103795	81839	VANGL1	0.00032275	0.0126747	0.373305
A_23_P1038	10765	KDM5B	0.0174511	0.0566196	-0.595036
A_23_P103803	115352	FCRL3	0.522138	0.630898	-0.0894522
A_23_P103812	339479	FAM5C	0.679456	0.764418	0.0931757
A_23_P103824	5298	PI4KB	0.0348193	0.0892468	0.384968
A_23_P103837	9898	UBAP2L	0.0571692	0.126228	-0.334341
A_23_P10385	51514	DTL	0.489096	0.601621	-0.0423994
A_23_P103864	79573	TTC13	0.00192241	0.0182424	0.556922
A_23_P103877	126755	LRRC38	0.347818	0.465768	0.188463
A_23_P103885	54998	AURKAIP1	0.00361841	0.0237863	-0.990037
A_23_P103897	100505741	SPATA1	0.522879	0.631496	-0.0907707
A_23_P103905	51506	UFC1	0.010258	0.0410559	-0.371059
A_23_P10391	1290	COL5A2	0.00171122	0.0175648	0.560368
A_23_P103919	8703	B4GALT3	0.238508	0.352787	-0.211832
A_23_P103923	9917	FAM20B	0.00926054	0.0385729	-0.257466
A_23_P103932	2268	FGR	0.78155	0.84483	0.0289879
A_23_P103942	55735	DNAJC11	0.0236874	0.069084	-0.90623
A_23_P103951	NA		0.00171343	0.017567	0.68007
A_23_P103968	22977	AKR7A3	0.0057683	0.0298763	-0.328355
A_23_P103971	199974	CYP4Z1	1.81e-07	0.000254741	-1.03395
A_23_P103981	723790	HIST2H2AA4	0.000746359	0.0141294	-1.05472
A_23_P103996	2730	GCLM	0.147859	0.248574	0.215119
A_23_P10401	5523	PPP2R3A	0.720168	0.797162	0.0519804
A_23_P104012	NA		0.00751912	0.0343645	0.40222
A_23_P104022	116461	TSEN15	0.0044237	0.0262934	1.06991
A_23_P104025	116461	TSEN15	0.0047658	0.0272411	0.50076
A_23_P104046	10380	BPNT1	0.00263696	0.0206248	-0.577159
A_23_P104054	51430	C1orf9	0.000182809	0.0111204	0.747712
A_23_P104065	23463	ICMT	0.164399	0.268584	-0.0992693
A_23_P104073	6274	S100A3	0.00230803	0.0195638	-0.668057
A_23_P104086	9696	CROCC	0.0128413	0.0468326	-0.75839
A_23_P104098	127833	SYT2	0.410632	0.528484	-0.0816056
A_23_P104109	26750	RPS6KC1	0.000393026	0.0131484	0.555255
A_23_P104116	9939	RBM8A	0.0017212	0.01757	-0.33607
A_23_P104138	339500	ZNF678	0.437061	0.554491	0.0823466
A_23_P104146	9202	ZMYM4	0.00473553	0.02717	0.722922
A_23_P104151	51249	TMEM69	0.070845	0.146788	-0.256502
A_23_P104188	1999	ELF3	0.010837	0.0424167	-0.24657
A_23_P104193	3688	ITGB1	0.606866	0.703682	0.0667077
A_23_P104199	3688	ITGB1	0.347382	0.465309	-0.133731
A_23_P104201	10730	YME1L1	0.000956167	0.0148969	0.429423
A_23_P104224	29974	A1CF	0.27173	0.388712	0.173443
A_23_P104237	57678	GPAM	0.232894	0.346656	-0.0635196
A_23_P104252	80760	ITIH5	0.068567	0.14346	0.530665
A_23_P104275	387700	SLC16A12	0.0478544	0.111365	-0.320174
A_23_P104282	55719	FAM178A	0.0226577	0.0671122	0.271757
A_23_P104295	6468	FBXW4	0.0024898	0.0201265	-0.733804
A_23_P1043	55765	C1orf106	0.00116536	0.0156666	-0.545444
A_23_P104318	54541	DDIT4	0.525226	0.63351	-0.101576
A_23_P104323	4255	MGMT	0.00164432	0.0173161	-0.908628
A_23_P104335	220965	FAM13C	0.229026	0.342483	-0.255978
A_23_P104346	5305	PIP4K2A	0.0293216	0.0794099	-0.448828
A_23_P104351	404636	FAM45A	0.422925	0.540437	-0.0794387
A_23_P104362	1892	ECHS1	0.000581582	0.0137401	-0.857241
A_23_P104372	23234	DNAJC9	0.00959492	0.0393943	0.354525
A_23_P104387	27069	GHITM	0.0120799	0.0451645	0.304928
A_23_P104413	22947	DUX4	0.160992	0.264375	-0.336183
A_23_P10442	114876	OSBPL1A	0.0321931	0.0846425	0.489481
A_23_P104438	84665	MYPN	0.00372727	0.0241561	0.42589
A_23_P104445	118788	PIK3AP1	0.947108	0.963995	0.0137059
A_23_P104451	79009	DDX50	0.00372506	0.0241504	0.527994
A_23_P104464	240	ALOX5	0.028955	0.0787132	0.4694
A_23_P104471	51207	DUSP13	0.85715	0.90106	0.0260536
A_23_P104484	338557	O3FAR1	0.333495	0.451591	-0.19092
A_23_P104493	9060	PAPSS2	0.00105485	0.0153473	-0.171738
A_23_P104509	9679	FAM53B	0.0108612	0.0424752	-0.656113
A_23_P104522	10529	NEBL	0.748064	0.818976	0.114912
A_23_P104555	26287	ANKRD2	0.185517	0.293099	-0.273973
A_23_P104563	1374	CPT1A	0.0108993	0.0425471	-0.583979
A_23_P104579	10263	CDK2AP2	0.0010015	0.0151135	-0.829279
A_23_P10458	55267	C22orf26	0.0618958	0.133438	-0.720964
A_23_P104583	57175	CORO1B	0.0100219	0.0404597	-0.397063
A_23_P104594	6343	SCT	0.0854252	0.167613	-0.248151
A_23_P104607	5702	PSMC3	0.000360516	0.0128928	-0.853498
A_23_P104617	120071	GYLTL1B	0.0444338	0.105666	-0.475504
A_23_P104624	23052	ENDOD1	0.0991775	0.186166	0.242965
A_23_P10463	4725	NDUFS5	0.0827158	0.164	-0.423429
A_23_P104641	738	C11orf2	0.0128197	0.0467912	-1.04102
A_23_P104651	113130	CDCA5	0.121451	0.215392	-0.266841
A_23_P104676	10291	SF3A1	0.140867	0.239997	-0.173853
A_23_P104689	5970	RELA	0.394951	0.513525	0.0781351
A_23_P104692	246330	PELI3	0.0306678	0.0820156	-0.820684
A_23_P104705	3177	SLC29A2	0.00473922	0.0271796	-0.438443
A_23_P104734	3703	STT3A	0.312137	0.429782	-0.122043
A_23_P104741	84623	KIRREL3	0.502191	0.613253	-0.159434
A_23_P104762	10413	YAP1	0.412715	0.530333	-0.0450756
A_23_P104798	3606	IL18	0.590775	0.689902	-0.0554597
A_23_P104804	7704	ZBTB16	0.728347	0.803807	-0.0408396
A_23_P104819	11181	TREH	0.352286	0.470357	0.177401
A_23_P104845	1132	CHRM4	0.504991	0.615642	0.118696
A_23_P104853	7007	TECTA	0.16929	0.27444	0.315548
A_23_P104865	NA		0.0485665	0.112549	-0.268181
A_23_P104876	53340	SPA17	0.184028	0.291448	0.160185
A_23_P10488	NA		0.0251231	0.0716904	-0.344203
A_23_P104881	54538	ROBO4	0.261667	0.378132	-0.22651
A_23_P104892	1982	EIF4G2	0.00146579	0.0165778	0.974537
A_23_P104942	51075	TMX2	0.0797502	0.159594	-0.264118
A_23_P10497	374868	ATP9B	0.00121614	0.0157467	0.379606
A_23_P104972	64232	MS4A5	0.70275	0.783296	0.0455842
A_23_P104996	7439	BEST1	0.104164	0.192992	0.229957
A_23_P10500	374868	ATP9B	0.907368	0.936585	0.0228986
A_23_P105002	6094	ROM1	0.690187	0.773203	-0.0938292
A_23_P105012	54979	HRASLS2	0.965702	0.977212	0.0105136
A_23_P105028	25923	ATL3	0.559785	0.663368	-0.0529598
A_23_P105044	6150	MRPL23	0.00548012	0.02907	-0.722116
A_23_P10506	27306	HPGDS	0.908997	0.937691	0.0202381
A_23_P105066	3611	ILK	0.0214072	0.0646551	-0.497011
A_23_P105088	430	ASCL2	0.835025	0.885178	-0.0340815
A_23_P105118	79324	OR51G1	0.690828	0.773687	0.0980797
A_23_P105138	847	CAT	0.0833789	0.164871	0.135855
A_23_P105144	57758	SCUBE2	0.112186	0.203515	0.549518
A_23_P10518	51270	TFDP3	0.0100192	0.0404597	-0.397361
A_23_P105184	116985	ARAP1	0.0206921	0.0633541	-0.65381
A_23_P105197	726	CAPN5	0.0202038	0.0623665	-0.340746
A_23_P105212	7069	THRSP	0.197852	0.307282	0.196859
A_23_P105227	10873	ME3	0.044221	0.105306	-0.224209
A_23_P10525	NA		0.870779	0.910508	0.0307191
A_23_P105251	2735	GLI1	0.130914	0.227494	0.426632
A_23_P105264	2120	ETV6	0.258581	0.37502	-0.296716
A_23_P105276	7637	ZNF84	0.00543006	0.0289735	0.425533
A_23_P105307	1606	DGKA	0.194796	0.303963	-0.223106
A_23_P105313	1967	EIF2B1	0.884398	0.920481	-0.0157776
A_23_P105368	NA		0.97511	0.983215	0.00378166
A_23_P105382	83591	THAP2	0.00672237	0.0324724	0.513854
A_23_P105392	10576	CCT2	0.0141165	0.0495093	0.41431
A_23_P105409	7786	MAP3K12	0.94189	0.960514	0.00955491
A_23_P10542	94031	HTRA3	0.889971	0.92446	-0.0308491
A_23_P105423	9840	KIAA0748	0.923151	0.947804	0.0138537
A_23_P105436	5781	PTPN11	0.11702	0.209668	-0.225335
A_23_P105442	160622	GRASP	0.286855	0.404215	0.167961
A_23_P105453	319101	KRT73	0.053216	0.119975	-0.473294
A_23_P105461	1240	CMKLR1	0.0811622	0.161654	-0.215567
A_23_P105465	1240	CMKLR1	0.0822601	0.163278	0.516387
A_23_P105475	28234	SLCO1B3	0.0346134	0.0888634	0.291818
A_23_P105495	50840	TAS2R14	0.7752	0.8401	0.0419286
A_23_P105519	51729	WBP11	0.00627058	0.0313513	0.600114
A_23_P105524	89869	PLCZ1	0.438862	0.556003	0.0902168
A_23_P105535	282809	POC1B	0.00212246	0.0189464	0.652476
A_23_P105545	6843	VAMP1	0.515618	0.625103	-0.0691823
A_23_P105562	7450	VWF	0.185991	0.293653	0.231988
A_23_P105571	56994	CHPT1	0.163241	0.267116	0.157137
A_23_P105583	83695	C12orf32	0.000693999	0.0138705	-0.479733
A_23_P10559	9625	AATK	0.0156116	0.0529615	0.423452
A_23_P105592	4598	MVK	0.108837	0.199346	-0.194535
A_23_P1056	51463	GPR89B	0.993644	0.995854	-0.000503876
A_23_P10561	NA		0.410628	0.528484	0.132706
A_23_P105619	89894	TMEM116	0.176002	0.282275	0.16457
A_23_P105625	84274	COQ5	0.0154648	0.0526145	-0.241033
A_23_P10564	NA		0.633935	0.726969	0.121287
A_23_P105646	466	ATF1	0.122027	0.216136	-0.144776
A_23_P105651	29951	PDZRN4	0.647903	0.738628	0.0379801
A_23_P105664	29080	CCDC59	0.0856581	0.167901	0.150103
A_23_P105691	55507	GPRC5D	0.431988	0.549416	0.367218
A_23_P105705	2251	FGF6	0.563426	0.666479	-0.0888905
A_23_P105730	56890	MDM1	0.0394445	0.0974995	-0.211368
A_23_P105732	NA		0.00224529	0.0193779	-0.818503
A_23_P105747	55198	APPL2	0.00720112	0.03357	0.425207
A_23_P105753	11137	PWP1	0.00441019	0.02625	0.568893
A_23_P105794	94240	EPSTI1	0.552292	0.657032	-0.0334656
A_23_P105803	2254	FGF9	0.543056	0.648963	-0.113791
A_23_P105815	NA		6.59e-06	0.00230946	-2.40528
A_23_P105833	54841	BIVM	0.0509406	0.116432	-0.225824
A_23_P105856	283537	SLC46A3	0.00419628	0.0255871	0.377766
A_23_P105862	10129	FRY	0.0026317	0.0205996	1.24501
A_23_P105873	7223	TRPC4	0.300017	0.41751	-0.121224
A_23_P105886	387911	C1QTNF9B	0.431179	0.54858	0.076084
A_23_P105900	690	BTF3P11	0.547226	0.652567	-0.0995705
A_23_P10591	284207	METRNL	0.118357	0.211346	-0.203906
A_23_P105923	1735	DIO3	0.103505	0.192084	0.852715
A_23_P105939	91828	EXOC3L4	0.0331305	0.0862939	0.551125
A_23_P105957	87	ACTN1	0.00201332	0.0184794	-0.901062
A_23_P105963	122481	AK7	0.0130514	0.0472501	0.348567
A_23_P105973	256394	SERPINA11	0.591049	0.690026	-0.106429
A_23_P106	23032	USP33	0.45989	0.575425	0.077367
A_23_P106002	4792	NFKBIA	0.0011763	0.0156687	1.05825
A_23_P106016	5587	PRKD1	0.00939589	0.0389195	0.852083
A_23_P106024	3714	JAG2	0.0109526	0.0426537	-0.798639
A_23_P106042	116173	CMTM5	0.251838	0.36766	0.132003
A_23_P10605	NA		0.000266334	0.0120648	-0.604055
A_23_P106056	1603	DAD1	0.641597	0.733356	0.0530459
A_23_P106069	NA		0.10015	0.187436	-0.349838
A_23_P106080	84659	RNASE7	0.0232514	0.0681664	-0.590609
A_23_P106103	9495	AKAP5	0.0401396	0.0986054	0.366159
A_23_P106117	4990	SIX6	0.182769	0.290058	0.212205
A_23_P106127	9786	KIAA0586	0.584041	0.683927	0.0752963
A_23_P106131	3895	KTN1	0.000170123	0.0108881	0.997265
A_23_P10614	5163	PDK1	0.0748477	0.152758	-0.135473
A_23_P106145	30001	ERO1L	0.0139475	0.0491299	0.509303
A_23_P106158	79944	L2HGDH	0.0352485	0.0900093	-0.209996
A_23_P106162	55320	MIS18BP1	0.558094	0.662167	-0.106042
A_23_P106174	5663	PSEN1	0.000162297	0.0108331	-0.515969
A_23_P106194	2353	FOS	0.0311065	0.0827623	0.385664
A_23_P106204	2954	GSTZ1	0.000955419	0.0148969	-0.810081
A_23_P106226	29082	CHMP4A	0.00119361	0.0156882	-0.816774
A_23_P106236	29018	PRO1768	0.121208	0.215057	0.252339
A_23_P106241	9321	TRIP11	0.0710002	0.147035	0.200353
A_23_P106258	283600	SLC25A47	0.000442086	0.0133409	-1.1817
A_23_P106280	55056	FLJ10038	0.0765427	0.155014	-0.144067
A_23_P106299	10169	SERF2	0.00325715	0.0226038	-0.36972
A_23_P106322	64506	CPEB1	0.00506545	0.0281157	-0.594844
A_23_P106362	366	AQP9	0.276324	0.393665	-0.155698
A_23_P106371	342096	GOLGA6A	0.514499	0.624133	0.0545641
A_23_P106389	8482	SEMA7A	0.0405104	0.099231	-0.5557
A_23_P106391	56906	THAP10	0.00130524	0.0160272	0.93024
A_23_P10640	339221	ENPP7	0.178469	0.285016	0.419215
A_23_P106405	4692	NDN	0.111445	0.202538	0.285027
A_23_P106412	NA		0.0757095	0.153858	-0.669488
A_23_P106425	348110	C15orf38	0.00920296	0.0384316	-0.557387
A_23_P106433	91433	RCCD1	0.0400685	0.0985145	0.295235
A_23_P106439	91433	RCCD1	0.130185	0.226581	-0.163787
A_23_P106463	4947	OAZ2	0.000308752	0.0126312	-0.474135
A_23_P10647	54360	CYTL1	0.797725	0.856847	0.0494481
A_23_P106472	NA		0.0589071	0.128934	-0.479683
A_23_P106481	51234	TMEM85	0.0203808	0.0627147	-0.38384
A_23_P106497	3658	IREB2	0.0269266	0.0749362	0.289495
A_23_P106505	9836	LCMT2	0.000488033	0.013472	0.896442
A_23_P106522	54617	INO80	0.00125634	0.0158643	0.649182
A_23_P106532	113189	CHST14	0.857343	0.90107	0.0214369
A_23_P106544	56942	C16orf61	0.605792	0.702825	-0.0401999
A_23_P106559	64718	UNKL	0.00131392	0.0160355	-0.579241
A_23_P106562	2588	GALNS	0.0568118	0.125636	-0.274272
A_23_P106575	2806	GOT2	0.899557	0.930889	-0.0149221
A_23_P106602	83716	CRISPLD2	0.00566835	0.0295828	-0.549458
A_23_P106617	58189	WFDC1	0.656375	0.745819	0.0864286
A_23_P106629	10261	IGSF6	0.312375	0.430052	0.165348
A_23_P106633	55794	DDX28	0.144384	0.244325	-0.196068
A_23_P106656	766	CA7	0.757227	0.826029	-0.0469944
A_23_P106661	113540	CMTM1	0.0317626	0.083936	-0.505702
A_23_P106663	100529251	CKLF-CMTM1	0.0170319	0.0557842	-0.784484
A_23_P106675	5336	PLCG2	0.486097	0.599002	0.0607214
A_23_P106682	2013	EMP2	0.0858942	0.168243	-0.149912
A_23_P106694	5119	CHMP1A	0.00977555	0.0398526	-1.01103
A_23_P106708	6187	RPS2	0.416316	0.533704	-0.417941
A_23_P106720	10607	TBL3	0.00247028	0.0200558	-0.790535
A_23_P106727	9727	RAB11FIP3	0.308131	0.425695	-0.122518
A_23_P106737	55692	LUC7L	0.00185481	0.0180306	-0.421986
A_23_P106741	5713	PSMD7	0.777315	0.841739	0.038199
A_23_P106761	11151	CORO1A	0.0176126	0.0569896	-0.597131
A_23_P106773	6799	SULT1A2	0.327619	0.445696	-0.172885
A_23_P106798	6477	SIAH1	0.0571398	0.126184	0.323722
A_23_P106806	83886	PRSS27	0.182786	0.290058	-0.347822
A_23_P106814	NA		0.088491	0.171674	-0.256697
A_23_P106822	28987	NOB1	0.00435546	0.0260645	-0.406225
A_23_P106835	583	BBS2	0.00227777	0.0194625	0.392588
A_23_P106844	4502	MT2A	0.932186	0.953941	-0.0389434
A_23_P10685	23640	HSPBP1	0.00498901	0.0278943	-0.976179
A_23_P106859	10328	COX4NB	0.0191691	0.0602711	0.28245
A_23_P106874	83449	PMFBP1	0.249682	0.365397	0.17609
A_23_P106887	2521	FUS	0.0005799	0.0137376	-0.715096
A_23_P106898	93129	ORAI3	0.00573829	0.0297772	-0.295069
A_23_P106906	5493	PPL	0.00754594	0.0344525	-0.524167
A_23_P106922	4166	CHST6	0.0281479	0.0772206	-0.740363
A_23_P106933	116285	ACSM1	0.323105	0.441042	0.180168
A_23_P106945	113	ADCY7	0.00661255	0.032176	-0.571997
A_23_P106973	10801	2009-09-01	0.65845	0.747638	-0.0626676
A_23_P10699	29934	SNX12	0.000660887	0.0138039	-0.648936
A_23_P106998	51649	MRPS23	0.0483091	0.11215	-0.267256
A_23_P10701	323	APBB2	0.169822	0.275091	0.219378
A_23_P107036	8834	TMEM11	0.000662075	0.0138039	-0.549045
A_23_P107048	NA		0.0013843	0.0163234	-0.929288
A_23_P107051	8557	TCAP	0.0563486	0.124915	-0.658711
A_23_P107064	8711	TNK1	0.100163	0.187451	-0.429081
A_23_P107073	6117	RPA1	1.67e-05	0.00413091	0.432081
A_23_P107087	55720	TSR1	0.0479655	0.111579	-0.144029
A_23_P107102	84643	KIF2B	0.689036	0.772314	0.108365
A_23_P107116	7732	RNF112	0.594989	0.69352	-0.110479
A_23_P107132	5957	RCVRN	0.290763	0.408291	-0.156899
A_23_P107154	84669	USP32	0.813498	0.868493	-0.0159829
A_23_P107166	79777	ACBD4	0.036615	0.092429	-0.478003
A_23_P107173	4222	MEOX1	0.325525	0.443421	0.0955478
A_23_P1072	476	ATP1A1	0.546227	0.651728	-0.0686138
A_23_P107206	6774	STAT3	0.0251346	0.0717131	-0.192206
A_23_P10721	9001	HAP1	0.551289	0.656135	0.0432287
A_23_P107211	5878	RAB5C	6.03e-07	0.000646074	-0.529158
A_23_P107214	5878	RAB5C	0.000966475	0.0149461	-0.310352
A_23_P107238	54799	MBTD1	1.18e-05	0.00325222	-0.901739
A_23_P107247	8913	CACNA1G	0.55929	0.663106	0.0944564
A_23_P107257	8405	SPOP	0.00164679	0.0173161	-0.674772
A_23_P107283	3212	HOXB2	0.0129824	0.0471086	0.695306
A_23_P107295	114659	LRRC37B	0.778432	0.842619	0.0119138
A_23_P107307	9058	SLC13A2	0.195	0.304091	-0.461585
A_23_P107313	6388	SDF2	0.0636192	0.135995	-0.272997
A_23_P107322	84940	CORO6	0.161678	0.265215	-0.314003
A_23_P107336	9744	ACAP1	0.19355	0.302526	0.314528
A_23_P107350	6517	SLC2A4	0.0948437	0.180294	0.209869
A_23_P107351	728392	LOC728392	0.000452491	0.0133999	0.747425
A_23_P107369	10749	KIF1C	0.097143	0.183441	-0.487605
A_23_P107373	4836	NMT1	0.00950463	0.0391727	-0.245047
A_23_P107394	84667	HES7	0.613605	0.709275	-0.137668
A_23_P107401	7077	TIMP2	0.00525859	0.0285151	-0.562172
A_23_P107412	5034	P4HB	0.0303188	0.0813529	-0.335251
A_23_P107421	7083	TK1	0.089651	0.173275	-0.205742
A_23_P10743	5158	PDE6B	0.332977	0.451112	-0.128103
A_23_P107432	NA		0.542139	0.648055	-0.0894216
A_23_P107443	100510248	LOC100510248	0.0344516	0.0885979	-0.648564
A_23_P107454	83896	KRTAP3-1	0.143202	0.242875	0.442923
A_23_P107465	3881	KRT31	0.612702	0.708506	-0.0784413
A_23_P107483	8392	OR3A3	0.322976	0.440916	0.104019
A_23_P107507	10951	CBX1	0.0136628	0.048562	-0.526803
A_23_P107513	79959	CEP76	0.00964	0.0395359	0.472903
A_23_P10753	NA		0.195494	0.304716	-0.388872
A_23_P107531	125336	LOXHD1	0.71916	0.796369	0.0459265
A_23_P107552	22878	TRAPPC8	0.00467424	0.0269896	0.648775
A_23_P107565	361	AQP4	0.0562155	0.124714	-0.484812
A_23_P107578	NA		0.291536	0.409055	-0.225488
A_23_P107587	4864	NPC1	0.152067	0.253722	0.162405
A_23_P107597	5205	ATP8B1	0.527584	0.635548	-0.0906917
A_23_P107612	5874	RAB27B	0.104849	0.193901	0.206582
A_23_P107623	89777	SERPINB12	0.387469	0.506156	0.185005
A_23_P107644	6632	SNRPD1	0.015786	0.0532872	-0.272997
A_23_P107653	2109	ETFB	0.00066948	0.0138072	-1.01467
A_23_P107661	5518	PPP2R1A	0.111003	0.202039	-0.484468
A_23_P107673	140612	ZFP28	0.114948	0.207019	0.36812
A_23_P107684	25799	ZNF324	0.0175045	0.0567294	-0.873858
A_23_P107693	54807	ZNF586	0.277413	0.394667	0.112399
A_23_P107701	2067	ERCC1	0.000296012	0.0124068	-0.786025
A_23_P107714	57787	MARK4	0.0749776	0.152909	-0.596553
A_23_P107724	7771	ZFP112	0.00706936	0.0332161	0.695216
A_23_P107735	973	CD79A	0.00866241	0.0372326	-0.850785
A_23_P107744	53637	S1PR5	0.0369636	0.0930558	-0.697426
A_23_P107750	53637	S1PR5	0.00778904	0.03507	-0.43531
A_23_P107763	10781	ZNF266	0.974719	0.982939	-0.00252062
A_23_P107775	147744	TMEM190	0.0739574	0.151507	-0.882133
A_23_P107795	55101	ATP5SL	0.0180331	0.0579026	-0.126954
A_23_P107801	84167	C19orf44	0.024768	0.0710878	-0.74791
A_23_P107847	353514	LILRA5	0.311502	0.429138	0.210618
A_23_P10785	143187	VTI1A	0.0337702	0.0874211	-0.237304
A_23_P107855	84922	FIZ1	0.0558919	0.124231	-0.713606
A_23_P107881	147837	ZNF563	0.00680831	0.0326786	0.557431
A_23_P107894	78992	YIPF2	0.0027804	0.0210948	-0.659654
A_23_P107903	57139	RGL3	0.00814325	0.0359081	-0.648809
A_23_P107911	5655	KLK10	0.613499	0.709187	-0.131404
A_23_P107933	51231	VRK3	0.00528266	0.0285624	-0.64496
A_23_P107942	25888	ZNF473	0.00170048	0.0175388	-0.317123
A_23_P107959	51070	NOSIP	0.0014185	0.0164245	-0.937951
A_23_P107963	2523	FUT1	0.0777142	0.156729	-0.447417
A_23_P107974	2524	FUT2	0.138389	0.236858	0.253429
A_23_P10798	1267	CNP	0.0125654	0.0462298	-0.264896
A_23_P107981	6820	SULT2B1	0.0111323	0.0430778	-0.801261
A_23_P107994	54958	TMEM160	0.0112953	0.0435005	-0.940572
A_23_P108028	7705	ZNF146	0.015093	0.0517273	0.369481
A_23_P108042	9437	NCR1	0.0257573	0.0728661	0.387911
A_23_P108054	255043	TMEM86B	0.0603127	0.13102	-0.614254
A_23_P108062	653499	LGALS7B	0.116693	0.209274	-0.493669
A_23_P108075	56301	SLC7A10	0.0182456	0.058358	0.792637
A_23_P108082	84699	CREB3L3	0.218431	0.330414	0.526925
A_23_P108103	NA		0.679769	0.764666	-0.0883457
A_23_P108129	7766	ZNF223	0.314073	0.431756	-0.126426
A_23_P108135	8943	AP3D1	0.000499149	0.013472	-1.40558
A_23_P108143	2593	GAMT	0.00217135	0.0191754	-1.20583
A_23_P10815	9698	PUM1	0.000701156	0.0139148	0.712623
A_23_P108157	27134	TJP3	0.0243525	0.070259	-0.410294
A_23_P108170	5675	PSG6	0.541778	0.647777	-0.0612724
A_23_P108180	116444	GRIN3B	0.170701	0.276074	-0.158485
A_23_P108200	5864	RAB3A	0.0209674	0.0638442	-0.411373
A_23_P108216	5348	FXYD1	0.115038	0.207148	0.616718
A_23_P108221	83983	TSSK6	0.345044	0.463237	-0.165743
A_23_P108244	1340	COX6B1	0.000319949	0.0126747	-0.596116
A_23_P108265	26658	OR7C2	0.0360178	0.0913932	-0.69443
A_23_P108280	66002	CYP4F12	0.0925823	0.177151	0.326826
A_23_P108294	8612	PPAP2C	0.00146186	0.0165616	-0.454805
A_23_P1083	2701	GJA4	0.00911694	0.0382427	-0.480259
A_23_P108303	4701	NDUFA7	0.0306983	0.0820764	-0.106262
A_23_P108314	81794	ADAMTS10	0.135651	0.233429	0.944431
A_23_P108326	2063	NR2F6	0.0473008	0.110491	-0.449983
A_23_P108331	6449	SGTA	0.003658	0.0239085	-0.941053
A_23_P108342	51276	ZNF571	0.00292978	0.0215843	0.992319
A_23_P108376	63892	THADA	0.00777293	0.0350438	-0.6817
A_23_P10839	4735	2002-09-01	0.00464429	0.0268955	-0.233538
A_23_P108394	NA		4.27e-05	0.00655926	0.804448
A_23_P108404	116987	AGAP1	0.0239679	0.0695607	0.413835
A_23_P108415	1615	DARS	0.0123212	0.0456664	-0.476259
A_23_P108427	11227	GALNT5	0.189188	0.297626	0.0994341
A_23_P108437	7855	FZD5	0.00382927	0.0244396	0.453157
A_23_P108463	57539	WDR35	0.0140463	0.0493486	0.343281
A_23_P108492	92935	MARS2	0.750073	0.820496	0.0516449
A_23_P108501	2043	EPHA4	0.244999	0.360118	-0.256895
A_23_P108514	8576	STK16	0.000351202	0.0128	-0.894775
A_23_P108522	79137	FAM134A	0.133438	0.23056	-0.229557
A_23_P108534	NA		0.895752	0.928733	0.0399401
A_23_P108546	5969	REG1P	0.255972	0.372409	-0.216015
A_23_P108554	1653	DDX1	0.566558	0.669151	0.0785248
A_23_P108564	8708	B3GALT1	0.122505	0.216692	0.41036
A_23_P108574	23683	PRKD3	0.00115922	0.0156666	0.405228
A_23_P10858	23141	ANKLE2	0.0221908	0.0661642	0.130858
A_23_P108592	5534	PPP3R1	0.128834	0.224872	0.270419
A_23_P108604	9448	MAP4K4	0.000378536	0.0130763	-0.527778
A_23_P108641	84908	FAM136A	0.109239	0.199818	0.206493
A_23_P108657	151525	WDSUB1	0.0138556	0.0488882	0.350287
A_23_P108662	7841	MOGS	0.00446864	0.026396	-0.384152
A_23_P108673	84141	FAM176A	0.0209353	0.0637797	0.374194
A_23_P108699	2492	FSHR	0.439819	0.556949	-0.083819
A_23_P10870	22845	DOLK	0.00576061	0.029844	-0.403552
A_23_P108708	51255	RNF181	0.000240889	0.0118007	-0.94745
A_23_P10873	7096	TLR1	0.0161181	0.0539153	0.926012
A_23_P108734	55821	ALLC	0.0355121	0.09042	0.371013
A_23_P108743	129446	XIRP2	0.239453	0.353846	0.223169
A_23_P108751	2274	FHL2	0.0164793	0.0546499	0.512554
A_23_P108761	55571	C2orf29	0.167441	0.272349	0.159785
A_23_P108785	10096	ACTR3	0.0556642	0.123842	0.225979
A_23_P108819	94097	SFXN5	0.176275	0.282556	-0.180647
A_23_P108823	114880	OSBPL6	0.442407	0.559181	-0.108935
A_23_P108835	51646	YPEL5	0.000475233	0.0134404	0.880796
A_23_P108842	1844	DUSP2	0.178363	0.284914	-0.108964
A_23_P10885	7767	ZNF224	0.153278	0.255091	0.198188
A_23_P108871	84524	ZC3H8	0.0278715	0.0767345	0.310946
A_23_P108883	56660	KCNK12	0.00866151	0.0372326	-0.481027
A_23_P108911	57159	TRIM54	0.705283	0.785372	-0.0371479
A_23_P108922	55233	MOBKL1B	0.000962652	0.0149107	-0.3393
A_23_P108932	56969	RPL23AP32	0.0118151	0.0445769	-0.775475
A_23_P108948	55686	MREG	0.0170344	0.0557842	0.426419
A_23_P108970	4867	NPHP1	0.160953	0.264333	0.209707
A_23_P108990	NA		0.0396494	0.0978349	-0.628266
A_23_P108994	6185	RPN2	0.0502299	0.115277	-0.350765
A_23_P109001	9675	TTI1	0.384066	0.502865	-0.111104
A_23_P109017	6431	SRSF6	5.23e-05	0.00729224	-0.762489
A_23_P10902	2487	FRZB	0.0119034	0.0447908	0.483988
A_23_P109026	60598	KCNK15	0.0785216	0.157844	-0.268409
A_23_P109034	6385	SDC4	7.47e-06	0.00253113	-0.652543
A_23_P109055	112858	TP53RK	0.190143	0.29877	0.112368
A_23_P109072	57167	SALL4	0.0473691	0.110574	-0.251165
A_23_P10911	196463	PLBD2	0.0121024	0.0452075	-1.01128
A_23_P109122	57593	EBF4	0.00912156	0.0382427	-0.715474
A_23_P109133	551	AVP	0.526649	0.634759	-0.127902
A_23_P109143	5621	PRNP	0.00527164	0.0285443	1.22555
A_23_P109171	631	BFSP1	0.548761	0.653932	-0.127488
A_23_P109184	3642	INSM1	0.0221566	0.0661197	0.362079
A_23_P109193	63908	NAPB	0.130494	0.226984	-0.227136
A_23_P109201	57136	C20orf3	0.00214611	0.0190676	0.682911
A_23_P109224	140732	SUN5	0.00158907	0.0171363	-0.552957
A_23_P109229	140732	SUN5	0.0585103	0.128326	0.411327
A_23_P109235	22913	RALY	0.00155041	0.0169466	-0.66299
A_23_P109254	9584	RBM39	0.00458207	0.0267113	0.442359
A_23_P109269	3911	LAMA5	0.035503	0.09042	-0.683289
A_23_P10927	83877	TM2D2	0.691818	0.774353	-0.0399657
A_23_P109286	2897	GRIK1	0.366705	0.484872	0.112284
A_23_P109304	6526	SLC5A3	0.144407	0.244334	0.238812
A_23_P109320	53820	DSCR6	0.0100358	0.0404948	-0.301982
A_23_P109322	5121	PCP4	0.55321	0.6578	-0.130991
A_23_P109333	8209	C21orf33	0.00444015	0.0263233	-0.509061
A_23_P109345	754	PTTG1IP	0.103718	0.192392	0.200839
A_23_P10936	85285	KRTAP4-1	0.0281342	0.0771936	0.302083
A_23_P109382	2928	GSC2	0.0161268	0.053933	-0.598272
A_23_P109393	421	ARVCF	0.0205729	0.0631269	-0.776326
A_23_P109410	80764	THAP7	0.00115273	0.0156496	-0.60854
A_23_P109420	9790	BMS1	0.00346575	0.0233173	-0.308598
A_23_P109427	2953	GSTT2	0.130446	0.22694	0.219856
A_23_P109436	135	ADORA2A	0.00521432	0.0284379	-0.838783
A_23_P109442	89781	HPS4	0.0023899	0.0197573	0.765256
A_23_P109446	89781	HPS4	0.0569736	0.125919	-0.15377
A_23_P109452	11200	CHEK2	0.799373	0.857943	0.031056
A_23_P10947	246329	STAC3	0.0274355	0.0759193	-0.352137
A_23_P109470	8563	THOC5	0.00460933	0.0267984	-0.386338
A_23_P109488	113791	PIK3IP1	0.836946	0.886527	-0.0264975
A_23_P109508	4689	NCF4	0.735504	0.809483	-0.048403
A_23_P109547	54471	SMCR7L	0.154189	0.256165	-0.147423
A_23_P10956	5239	PGM5	0.139939	0.238724	0.231789
A_23_P109593	25771	TBC1D22A	0.00566804	0.0295828	-0.881406
A_23_P109606	6305	SBF1	0.114792	0.206823	-0.39298
A_23_P109614	4336	MOBP	0.905926	0.935568	-0.0358029
A_23_P109636	26018	LRIG1	0.661199	0.749991	0.0611866
A_23_P109643	80325	ABTB1	0.0489204	0.113178	-0.814506
A_23_P109655	80723	TMEM22	0.0104853	0.0415924	0.579553
A_23_P10966	2562	GABRB3	0.00785314	0.035232	0.563566
A_23_P109677	100506946	LOC100506946	0.161202	0.264647	-0.203139
A_23_P109682	64343	AZI2	0.000678656	0.0138437	0.85242
A_23_P109720	NA		0.00492147	0.0277019	-1.3436
A_23_P109733	152185	SPICE1	0.00042442	0.0132978	0.85404
A_23_P109768	9616	RNF7	0.505101	0.615738	-0.0419279
A_23_P109774	27107	ZBTB11	0.00477931	0.0272745	0.820253
A_23_P109785	8856	NR1I2	0.289885	0.407434	0.279428
A_23_P109794	23243	ANKRD28	0.154719	0.256723	-0.165895
A_23_P10980	23284	LPHN3	0.196227	0.305494	0.359913
A_23_P109812	6854	SYN2	0.0622357	0.133904	-0.178668
A_23_P109821	10474	TADA3	0.4059	0.523894	-0.14242
A_23_P109843	3568	IL5RA	0.309073	0.426667	0.187218
A_23_P109864	2693	GHSR	0.622995	0.717514	-0.138275
A_23_P10987	NA		0.00372376	0.0241483	0.211704
A_23_P109877	80335	WDR82	0.0019693	0.0183295	-0.41749
A_23_P109881	3700	ITIH4	0.0258612	0.073024	-0.615503
A_23_P109895	65010	SLC26A6	0.0464679	0.10908	-0.449531
A_23_P109907	286676	ILDR1	0.0197126	0.0613447	-0.477308
A_23_P109913	10663	CXCR6	0.0376682	0.0942914	-0.374323
A_23_P109928	9861	PSMD6	0.815039	0.869658	0.0310184
A_23_P109934	51409	HEMK1	0.375202	0.493782	0.18914
A_23_P10995	27303	RBMS3	0.420381	0.537775	0.064077
A_23_P109950	93	ACVR2B	0.00856177	0.0370053	-1.06789
A_23_P109964	84692	CCDC54	0.215886	0.327536	-0.14596
A_23_P109974	51560	RAB6B	0.000147245	0.0106244	-0.196538
A_23_P109988	942	CD86	0.00126499	0.0158947	-0.819177
A_23_P110005	84276	NICN1	0.105165	0.194319	-0.383973
A_23_P110022	2624	GATA2	0.0143989	0.0501832	-1.02169
A_23_P110031	51385	ZNF589	0.0611088	0.132291	-0.385176
A_23_P11005	11173	ADAMTS7	0.0132537	0.0477144	-0.693987
A_23_P110052	668	FOXL2	0.0457538	0.107896	-0.861339
A_23_P110062	8893	EIF2B5	0.00769142	0.0348412	-0.554683
A_23_P110076	348793	WDR53	0.000671014	0.0138156	-0.339151
A_23_P110090	55779	WDR52	0.0246079	0.0707669	0.213763
A_23_P110108	84561	SLC12A8	0.220069	0.332284	-0.123965
A_23_P110116	6452	SH3BP2	0.0228391	0.0673973	-0.824275
A_23_P110122	901	CCNG2	0.000595809	0.013772	0.938011
A_23_P110135	57728	WDR19	0.0687539	0.143727	0.29178
A_23_P110151	83478	ARHGAP24	0.00284304	0.0213176	0.616977
A_23_P110167	4258	MGST2	0.0195817	0.0610727	0.195803
A_23_P11017	NA		0.314076	0.431756	-0.128722
A_23_P110175	1519	CTSO	0.134699	0.232171	-0.314772
A_23_P110184	6307	SC4MOL	0.479164	0.59298	-0.107421
A_23_P110196	51191	HERC5	0.0252102	0.0718538	0.211095
A_23_P1102	58	ACTA1	0.580548	0.680975	0.0408182
A_23_P110204	6374	CXCL5	0.236628	0.350813	-0.230399
A_23_P110212	2180	ACSL1	0.269532	0.386546	0.160677
A_23_P110234	1446	CSN1S1	0.000200958	0.0112489	-0.886874
A_23_P110243	57721	METTL14	0.167947	0.272883	-0.0805705
A_23_P11025	7739	ZNF185	0.560732	0.664278	0.0466536
A_23_P110253	3815	KIT	0.00135453	0.0162109	1.03691
A_23_P110266	79625	NDNF	0.371319	0.489726	0.218939
A_23_P110276	84740	AFAP1-AS1	0.0552784	0.123222	0.608253
A_23_P110288	79807	GSTCD	0.013061	0.0472513	-0.177826
A_23_P110299	6870	TACR3	0.177075	0.283397	0.716666
A_23_P110304	246175	CNOT6L	0.00692465	0.0329386	-0.939347
A_23_P110319	80157	CWH43	0.656819	0.74622	-0.0836913
A_23_P11032	84679	SLC9A7	0.00099686	0.0151135	-0.810923
A_23_P110345	26511	CHIC2	0.151408	0.252933	0.172435
A_23_P110362	8649	LAMTOR3	0.382522	0.501211	0.15332
A_23_P110386	64854	USP46	0.937913	0.957865	-0.0186051
A_23_P110403	27295	PDLIM3	0.00118194	0.0156819	0.933176
A_23_P110412	441027	TMEM150C	0.104597	0.193558	0.334636
A_23_P110430	4487	MSX1	0.0237119	0.0691211	-0.678476
A_23_P110433	23398	PPWD1	0.00310633	0.0221441	0.453664
A_23_P110445	10307	APBB3	0.0793693	0.159018	-0.403389
A_23_P110462	29930	PCDHB1	0.63824	0.730415	0.0719872
A_23_P110473	4671	NAIP	0.00513153	0.0282402	0.481891
A_23_P110492	10299	2006-03-01	0.0817511	0.162543	-0.422557
A_23_P110504	81037	CLPTM1L	0.0163627	0.0543788	-0.240284
A_23_P11051	57187	THOC2	0.115399	0.20758	0.202123
A_23_P110531	10468	FST	0.0215666	0.0649738	-0.464307
A_23_P110557	90249	UNC5A	0.0497911	0.114592	-0.359906
A_23_P110569	55521	TRIM36	0.000929914	0.0147463	1.27321
A_23_P110571	375449	MAST4	0.0285087	0.0778873	-0.793755
A_23_P110585	153768	PRELID2	0.51724	0.626513	-0.0787643
A_23_P110598	134430	WDR36	0.00367675	0.0239966	0.252722
A_23_P110606	9794	MAML1	0.055316	0.123279	0.160598
A_23_P110611	54826	GIN1	0.00313082	0.0222236	0.938112
A_23_P110624	1501	CTNND2	0.136466	0.234477	-0.16782
A_23_P110643	51265	CDKL3	0.0249314	0.0713919	0.41299
A_23_P110655	NA		0.00170843	0.0175648	-1.23699
A_23_P110661	23517	SKIV2L2	0.00223821	0.0193519	0.625691
A_23_P110686	8614	STC2	0.00083122	0.014279	-0.564078
A_23_P110699	91975	ZNF300	0.142256	0.241684	-0.602529
A_23_P11070	84636	GPR174	0.532293	0.639456	-0.139461
A_23_P110704	10569	SLU7	0.0103164	0.0411604	0.475701
A_23_P11071	64840	PORCN	0.469581	0.584294	-0.108408
A_23_P110712	1843	DUSP1	0.00439634	0.0262105	0.612877
A_23_P110725	5562	PRKAA1	0.473316	0.587769	0.0919534
A_23_P110764	9499	MYOT	0.209822	0.320746	0.214643
A_23_P110777	3950	LECT2	0.539214	0.645589	0.1845
A_23_P110787	9522	SCAMP1	0.645444	0.736685	0.0474084
A_23_P110791	1436	CSF1R	0.0373857	0.0938361	0.651099
A_23_P110802	64946	CENPH	0.0629091	0.134857	-0.233893
A_23_P11081	8852	AKAP4	0.107794	0.197885	-0.425247
A_23_P110811	1350	COX7C	0.0184178	0.0587437	0.820266
A_23_P110837	50805	IRX4	0.819286	0.872858	0.0339963
A_23_P110846	9337	CNOT8	0.0078839	0.0352976	0.422924
A_23_P110851	7015	TERT	0.813215	0.868277	0.0308857
A_23_P110879	10758	TRAF3IP2	0.0543587	0.121794	-0.130839
A_23_P110882	23270	TSPYL4	0.00185612	0.0180306	1.09658
A_23_P110896	26503	SLC17A5	0.153114	0.254889	-0.135785
A_23_P110903	135295	SRSF12	0.0179067	0.0576637	0.397942
A_23_P110941	2941	GSTA4	0.159907	0.263079	0.241237
A_23_P110957	2295	FOXF2	0.0141585	0.0496081	0.278189
A_23_P110961	51660	BRP44L	0.00559281	0.0294245	0.539787
A_23_P111000	5698	PSMB9	0.000951646	0.0148878	-0.781894
A_23_P111005	25844	YIPF3	0.0263483	0.0739261	-0.554843
A_23_P111020	6722	SRF	0.104993	0.194098	-0.274018
A_23_P11103	9210	BMP15	0.0350704	0.0896604	-0.416476
A_23_P111037	8350	HIST1H3A	0.119696	0.21296	-0.173709
A_23_P111041	8346	HIST1H2BI	0.270085	0.38714	-0.134566
A_23_P111054	3018	HIST1H2BB	0.000113528	0.00954512	-0.333177
A_23_P111088	81697	OR2B2	0.0567712	0.125593	-0.332116
A_23_P111092	26716	OR2H1	0.649749	0.740156	-0.105949
A_23_P111112	57176	VARS2	0.00399608	0.0249884	-0.884335
A_23_P111126	10866	HCP5	0.126869	0.222242	-0.270502
A_23_P111132	3303	HSPA1A	0.0653103	0.138555	-0.247724
A_23_P111141	7917	BAG6	0.00945892	0.0390755	-0.64916
A_23_P111155	221527	ZBTB12	0.475107	0.589345	-0.0389381
A_23_P111171	8705	B3GALT4	0.422153	0.539669	-0.186263
A_23_P111188	9278	ZBTB22	0.792345	0.852577	0.0363025
A_23_P11119	NA		0.583328	0.683367	0.116274
A_23_P111194	25803	SPDEF	0.090615	0.174576	0.351805
A_23_P111206	2289	FKBP5	0.000514363	0.013472	-1.3316
A_23_P111228	51805	COQ3	0.234373	0.348403	0.0836222
A_23_P111240	9749	PHACTR2	0.00119275	0.0156878	0.714888
A_23_P111260	4907	NT5E	0.0121298	0.0452645	-0.256488
A_23_P111267	83699	SH3BGRL2	0.086883	0.1695	0.479229
A_23_P111273	51256	TBC1D7	0.303788	0.421327	-0.096954
A_23_P111288	51522	TMEM14C	0.0285759	0.0780139	0.298399
A_23_P111297	10799	RPP40	0.239706	0.354158	0.127092
A_23_P111303	22828	SCAF8	0.00116471	0.0156666	1.01632
A_23_P111306	22828	SCAF8	0.00177702	0.0177832	0.627197
A_23_P111311	9590	AKAP12	0.233	0.346764	0.135662
A_23_P111321	383	ARG1	0.575356	0.676676	0.14943
A_23_P111343	9774	BCLAF1	0.000869064	0.0144897	-0.605656
A_23_P111360	3298	HSF2	0.945483	0.963077	-0.00878638
A_23_P111361	285755	PPIL6	0.00304279	0.021906	0.774495
A_23_P111373	57380	MRS2	0.00174771	0.017662	0.763061
A_23_P111381	9474	ATG5	0.00221691	0.0193033	0.752569
A_23_P111395	6582	SLC22A2	0.863805	0.905479	-0.0370789
A_23_P111402	84870	RSPO3	0.360812	0.479151	0.153955
A_23_P111413	95681	TSGA14	0.000757501	0.0141294	-0.780415
A_23_P11144	1121	CHM	0.784575	0.847023	0.0274918
A_23_P111452	116988	AGAP3	0.221239	0.333595	0.175462
A_23_P111480	64940	STAG3L4	0.00835	0.0364551	0.492306
A_23_P111481	51593	SRRT	0.00822145	0.0360899	0.341097
A_23_P111487	51593	SRRT	0.0248273	0.0711934	-0.588966
A_23_P111492	64598	MOSPD3	0.0877403	0.170706	-0.672971
A_23_P111506	100316904	SAP25	0.73924	0.812308	-0.100137
A_23_P111517	64409	WBSCR17	0.194355	0.303507	0.954554
A_23_P111525	NA		0.672788	0.759408	0.0466326
A_23_P111531	2737	GLI3	0.0238334	0.0693361	0.483914
A_23_P111571	3200	HOXA3	0.766708	0.833422	-0.0646862
A_23_P111583	948	CD36	0.0040487	0.025151	0.390323
A_23_P111593	9265	CYTH3	0.478379	0.59232	0.0722249
A_23_P11160	79649	MAP7D3	0.0372801	0.0936651	0.23629
A_23_P111604	30010	NXPH1	0.0467087	0.109472	0.26297
A_23_P111621	9569	GTF2IRD1	0.00839091	0.0365831	0.339717
A_23_P111635	51657	STYXL1	0.00143235	0.0164868	-0.384723
A_23_P111657	6469	SHH	0.00539714	0.0288697	-0.518884
A_23_P111662	340273	ABCB5	0.0850878	0.167127	0.647738
A_23_P111672	26136	TES	0.641797	0.733502	-0.0522428
A_23_P111698	7975	MAFK	0.256468	0.372879	-0.159279
A_23_P1117	54879	ST7L	0.177741	0.284253	-0.345211
A_23_P111701	2791	GNG11	0.00133819	0.0161465	1.09132
A_23_P111712	7978	MTERF	0.0246262	0.0707848	0.227935
A_23_P111724	154661	RUNDC3B	0.136764	0.234871	0.545431
A_23_P111737	10268	RAMP3	0.269259	0.386286	0.21427
A_23_P111745	83637	ZMIZ2	0.0110442	0.0428678	-0.951809
A_23_P111753	64983	MRPL32	0.0894235	0.172942	0.323351
A_23_P111766	NA		0.0740926	0.1517	-0.488949
A_23_P111797	84214	DKFZP434F142	0.0091304	0.0382557	-0.800808
A_23_P111804	64761	PARP12	0.00460199	0.0267799	-0.828317
A_23_P111811	54556	ING3	0.0138705	0.0489366	0.370736
A_23_P111826	6677	SPAM1	0.956285	0.970608	0.0130345
A_23_P111835	1738	DLD	0.000459723	0.0134074	0.93863
A_23_P111843	10467	ZNHIT1	0.00111015	0.0154487	-0.760974
A_23_P111860	55698	RADIL	0.0123931	0.0458467	0.762089
A_23_P111865	7589	ZSCAN21	0.556358	0.660796	-0.0493504
A_23_P111888	115908	CTHRC1	0.972379	0.981397	-0.00695896
A_23_P111919	29942	PURG	0.0616412	0.133127	0.383799
A_23_P11192	10477	UBE2E3	0.00185904	0.0180306	1.03409
A_23_P111929	51633	OTUD6B	0.544292	0.64999	-0.0753918
A_23_P111947	1015	CDH17	0.0126317	0.0463695	0.672451
A_23_P111961	84549	MAK16	0.00186742	0.0180306	0.288609
A_23_P111978	51305	KCNK9	0.0731034	0.15026	-0.485717
A_23_P111981	66004	LYNX1	0.0449644	0.106537	-0.832474
A_23_P111995	4017	LOXL2	0.000532499	0.0135655	0.364979
A_23_P112004	23639	LRRC6	0.337185	0.455385	0.143846
A_23_P11201	2857	GPR34	0.016997	0.0557205	-0.452458
A_23_P112016	10395	DLC1	0.26847	0.385422	0.152296
A_23_P112026	3620	IDO1	0.0256431	0.0727019	0.320284
A_23_P112061	138050	HGSNAT	0.0162629	0.0541831	0.425424
A_23_P112078	9258	MFHAS1	0.000253603	0.0118831	-0.807928
A_23_P112086	1670	DEFA5	0.420383	0.537775	-0.129952
A_23_P112100	54212	SNTG1	0.16989	0.27512	0.343846
A_23_P112103	79792	GSDMD	0.00561694	0.0294926	-1.16074
A_23_P112113	9897	KIAA0196	0.000273653	0.0120773	0.707123
A_23_P112135	23471	TRAM1	0.00121346	0.0157467	0.917301
A_23_P11214	55922	NKRF	0.629526	0.723147	-0.0511898
A_23_P112159	27161	EIF2C2	0.000674834	0.0138437	-0.455602
A_23_P112162	8694	DGAT1	0.00693709	0.0329684	-0.880061
A_23_P112173	25769	SLC24A2	0.560435	0.664023	-0.0402819
A_23_P112187	84929	FIBCD1	0.0156233	0.0529822	-1.05811
A_23_P112201	23081	KDM4C	0.00121256	0.0157467	0.810338
A_23_P112220	3641	INSL4	0.15896	0.26192	0.161738
A_23_P11224	93380	MMGT1	0.23371	0.347656	0.128524
A_23_P112241	25822	DNAJB5	0.318313	0.436089	0.110215
A_23_P112251	2790	GNG10	0.000780054	0.0142192	1.4424
A_23_P112260	2790	GNG10	0.968924	0.979081	-0.00633669
A_23_P112275	9568	GABBR2	0.010754	0.042201	-0.477178
A_23_P112289	7111	TMOD1	0.00222123	0.0193051	0.50355
A_23_P112296	1621	DBH	0.191482	0.300233	0.211852
A_23_P112311	22954	TRIM32	0.00182217	0.0179201	0.507459
A_23_P112327	29991	OBP2A	0.61072	0.706887	-0.0765057
A_23_P112341	80010	RMI1	0.000701172	0.0139148	0.831236
A_23_P11237	6872	TAF1	0.0696717	0.145029	-0.157584
A_23_P112397	54461	FBXW5	0.00797102	0.0355037	-0.811388
A_23_P112406	9328	GTF3C5	0.00578481	0.0299217	-0.716426
A_23_P112412	54881	TEX10	0.879033	0.916497	-0.0151843
A_23_P112429	11224	RPL35	0.330646	0.448807	-0.418094
A_23_P11244	64219	PJA1	0.00162693	0.0172531	0.84363
A_23_P112452	2681	GGTA1P	0.406966	0.525007	0.203206
A_23_P112470	6366	CCL21	0.365638	0.48393	0.169251
A_23_P112478	318	NUDT2	0.00408874	0.0253069	-0.495704
A_23_P112481	360	AQP3	0.627073	0.721036	-0.0759658
A_23_P112482	360	AQP3	0.104811	0.193849	-0.223327
A_23_P112512	92014	MCART1	0.618271	0.713299	-0.0760532
A_23_P112531	399665	FAM102A	0.00858585	0.0370703	0.524509
A_23_P112548	81932	HDHD3	0.176066	0.282333	-0.20085
A_23_P112554	1306	COL15A1	0.0130702	0.0472683	0.539291
A_23_P11256	139599	MAGEE2	0.132198	0.229016	0.675388
A_23_P112564	3751	KCND2	0.52399	0.632466	0.173517
A_23_P112596	132	ADK	0.587596	0.686933	-0.0377925
A_23_P1126	54741	LEPROT	0.0104914	0.0416038	-0.376646
A_23_P112602	55223	TRIM62	0.075792	0.153945	0.28392
A_23_P112613	5718	PSMD12	0.00408801	0.0253069	0.563033
A_23_P11262	8263	F8A1	0.00556972	0.0293633	-0.292334
A_23_P112634	201895	C4orf34	0.00163142	0.0172659	0.643242
A_23_P112646	28	ABO	0.33403	0.452182	-0.102899
A_23_P112652	25904	CNOT10	0.376819	0.495401	-0.0721983
A_23_P112666	2301	FOXE3	0.573797	0.675424	-0.0671898
A_23_P112673	55055	ZWILCH	0.0921149	0.176515	-0.273073
A_23_P112698	10687	PNMA2	0.053524	0.120483	-0.23088
A_23_P112726	6335	SCN9A	0.20221	0.312256	0.323408
A_23_P112774	11156	PTP4A3	0.033386	0.0867498	-0.562235
A_23_P11279	79868	ALG13	0.343638	0.461864	0.0847027
A_23_P112798	1397	CRIP2	0.00594692	0.0303944	-0.364799
A_23_P112801	11261	CHP	0.00678072	0.0326188	0.862303
A_23_P112820	1903	S1PR3	0.110052	0.200852	-0.339294
A_23_P112825	51451	LCMT1	0.00448408	0.0264337	-0.611016
A_23_P112846	441024	MTHFD2L	0.0108526	0.0424656	0.631235
A_23_P112859	1469	CST1	0.50733	0.617831	-0.0889808
A_23_P11286	3188	HNRNPH2	0.000432693	0.0133328	0.89471
A_23_P112874	2262	GPC5	0.0573704	0.12655	0.384939
A_23_P112883	340371	NRBP2	0.000106015	0.00931927	0.553934
A_23_P112916	170691	ADAMTS17	0.0971168	0.183408	-0.374013
A_23_P112921	80765	STARD5	0.489182	0.601668	-0.0647909
A_23_P11295	100272147	MTCP1NB	0.851731	0.897342	-0.0125736
A_23_P112950	55729	ATF7IP	0.884994	0.920979	0.0129537
A_23_P112957	NA		0.0876588	0.170575	-0.144056
A_23_P112982	55530	SVOP	0.138973	0.237472	1.19003
A_23_P113005	1942	EFNA1	0.0177232	0.0572481	-0.192473
A_23_P113019	348980	HCN1	0.128897	0.224932	0.281099
A_23_P113026	5073	PARN	0.000118648	0.00976817	-0.411489
A_23_P113034	83938	C10orf11	0.214981	0.326537	-0.109054
A_23_P113056	NA		0.00019953	0.0112292	0.385707
A_23_P11309	55558	PLXNA3	0.0988913	0.185801	-0.321306
A_23_P113101	NA		0.445296	0.561828	0.140366
A_23_P113111	367	AR	0.146415	0.246744	0.22173
A_23_P113161	81563	C1orf21	0.234772	0.348856	0.250467
A_23_P113184	79068	FTO	0.171917	0.277581	-0.191247
A_23_P113204	2248	FGF3	0.652203	0.742374	0.158145
A_23_P113212	55076	TMEM45A	0.0339729	0.0877686	0.224952
A_23_P113237	64109	CRLF2	0.0314159	0.0833474	-0.400526
A_23_P113245	3516	RBPJ	0.000250702	0.0118419	0.614615
A_23_P113258	10125	RASGRP1	0.0126248	0.0463565	0.368558
A_23_P113263	NA		0.178618	0.285179	-0.538645
A_23_P113283	64393	ZMAT3	0.923639	0.948083	-0.00736396
A_23_P11331	90843	TCEAL8	0.00854513	0.0369696	0.539252
A_23_P113311	54681	P4HTM	0.00161043	0.0171857	-0.40798
A_23_P113317	54681	P4HTM	0.00206148	0.0187241	-0.469463
A_23_P113328	360023	ZBTB41	0.0163879	0.054445	0.28422
A_23_P113351	8404	SPARCL1	0.663563	0.751984	0.12055
A_23_P113367	117583	PARD3B	0.544033	0.649787	-0.0694919
A_23_P113380	55031	USP47	0.35752	0.475785	0.113782
A_23_P113382	23426	GRIP1	0.0112172	0.0433013	0.578486
A_23_P113393	8862	APLN	0.0166526	0.0550077	0.495915
A_23_P113405	26505	CNNM3	0.0403708	0.0990132	-0.624855
A_23_P11341	90736	FAM104B	0.0236901	0.0690869	0.347963
A_23_P113417	80233	C17orf70	0.0209511	0.063805	-0.602775
A_23_P113441	55164	SHQ1	0.466209	0.581185	0.0777197
A_23_P113453	NA		0.36829	0.48645	-0.22443
A_23_P113462	55605	KIF21A	0.00413308	0.0254191	0.794894
A_23_P113471	158584	FAAH2	0.0699258	0.145398	0.2744
A_23_P113523	8225	GTPBP6	0.00474043	0.0271796	-0.704842
A_23_P11353	10159	ATP6AP2	0.0111892	0.0432299	0.473794
A_23_P113549	NA		0.000819678	0.014279	-1.1633
A_23_P113553	4110	MAGEA11	0.0938388	0.178865	0.587471
A_23_P113570	3651	PDX1	0.356932	0.475182	0.0610124
A_23_P113572	930	CD19	0.0773304	0.156215	-0.288825
A_23_P113613	64866	CDCP1	0.0444422	0.10568	-0.64059
A_23_P11362	9767	PHF16	0.215713	0.32731	-0.190202
A_23_P113623	84311	MRPL45	0.00104727	0.0153053	0.255105
A_23_P113634	865	CBFB	0.000116605	0.0096572	0.653309
A_23_P113645	NA		0.758462	0.82698	0.0461774
A_23_P113656	10382	TUBB4	0.0455381	0.107506	-0.716796
A_23_P113682	142680	SLC34A3	0.0157087	0.0531389	-0.763131
A_23_P113692	NA		0.164669	0.268962	-0.401054
A_23_P113701	5154	PDGFA	0.703437	0.783827	-0.0666527
A_23_P113716	NA		0.620607	0.715414	-0.204282
A_23_P11372	3251	HPRT1	0.00194645	0.0183073	1.03874
A_23_P113728	92170	MTG1	0.008808	0.0375549	-0.237473
A_23_P113738	NA		0.324331	0.442132	0.398917
A_23_P113748	79750	ZNF385D	0.628397	0.722254	0.0928249
A_23_P113762	NA		0.191715	0.300516	0.420833
A_23_P113777	9358	ITGBL1	0.917594	0.943676	-0.00877716
A_23_P113789	10869	USP19	0.0161654	0.0539975	-0.310518
A_23_P113793	79413	ZBED2	0.595437	0.693963	-0.212508
A_23_P113803	11104	KATNA1	0.132011	0.228797	0.141389
A_23_P113811	NA		0.0352679	0.0900421	-0.215023
A_23_P113825	138151	NACC2	0.407934	0.526052	0.112754
A_23_P113841	NA		0.596224	0.694644	-0.0708089
A_23_P113888	129563	DIS3L2	0.207287	0.317857	-0.328758
A_23_P11390	9084	VCY	0.184383	0.291872	0.625843
A_23_P113952	NA		0.566733	0.66926	-0.117639
A_23_P113966	55763	EXOC1	0.0001727	0.0109367	0.484029
A_23_P11397	83868	TTTY13	0.28076	0.398079	-0.128234
A_23_P113972	55763	EXOC1	0.0106806	0.0420306	0.364972
A_23_P113994	55243	KIRREL	0.488175	0.600877	-0.301406
A_23_P114008	79853	TM4SF20	0.388023	0.506541	-0.11324
A_23_P114048	NA		0.0301873	0.0810849	0.96015
A_23_P114057	54910	SEMA4C	0.110327	0.20121	0.215072
A_23_P114061	80036	TRPM3	0.000127765	0.0100816	-1.48474
A_23_P114075	2186	BPTF	0.389372	0.507817	-0.103907
A_23_P11408	442862	PRY2	0.213269	0.324598	0.287655
A_23_P114084	5251	PHEX	0.418472	0.535889	0.130585
A_23_P114095	51360	MBTPS2	0.731919	0.806657	-0.0437238
A_23_P114105	23641	LDOC1	0.658808	0.747857	0.0766991
A_23_P114118	10389	SCML2	0.0467682	0.109565	-0.216584
A_23_P114134	10214	SSX3	0.634387	0.727261	0.113933
A_23_P114144	28952	CCDC22	0.00626545	0.0313349	-0.811843
A_23_P114155	27238	GPKOW	0.152234	0.253895	-0.212704
A_23_P114164	29978	UBQLN2	0.00495344	0.0277902	0.601286
A_23_P114172	54885	TBC1D8B	0.00284858	0.0213364	1.02765
A_23_P114185	7102	TSPAN7	0.580359	0.680822	-0.0989042
A_23_P114210	5456	POU3F4	0.0170503	0.0558177	-0.443081
A_23_P114221	5931	RBBP7	0.0228042	0.067337	0.352147
A_23_P114232	10549	PRDX4	0.0363904	0.0920424	0.215676
A_23_P114259	140456	ASB11	0.138284	0.236748	0.172493
A_23_P114275	10857	PGRMC1	0.196663	0.305944	-0.173347
A_23_P114282	28985	MCTS1	0.0324695	0.0851565	0.304751
A_23_P114299	2833	CXCR3	0.608217	0.704632	0.0998223
A_23_P114307	5030	P2RY4	0.372498	0.490878	0.179834
A_23_P114314	1046	CDX4	0.0602127	0.130862	0.987591
A_23_P114349	170626	XAGE3	0.381679	0.500378	0.129315
A_23_P114353	55998	NXF5	0.908224	0.937185	0.0218681
A_23_P114361	4204	MECP2	0.353808	0.471775	0.170959
A_23_P114374	5956	OPN1LW	0.0420889	0.101874	0.82823
A_23_P114381	26576	SRPK3	0.390005	0.508433	0.125682
A_23_P114405	9643	MORF4L2	0.00955869	0.0393125	0.562054
A_23_P114414	79836	LONRF3	0.866082	0.906893	-0.0228441
A_23_P114423	9104	RGN	0.137396	0.235631	0.30369
A_23_P114445	57692	MAGEE1	0.737962	0.811426	-0.0480444
A_23_P114466	90665	TBL1Y	0.00595807	0.030415	-0.631748
A_23_P1145	55149	MTPAP	0.00253129	0.0202661	-0.167775
A_23_P114582	NA		0.361526	0.479821	0.100227
A_23_P114585	80003	PCNXL2	0.525586	0.633845	-0.0565397
A_23_P114597	6706	SPRR2G	0.118371	0.211358	-0.165946
A_23_P11461	7335	UBE2V1	0.0477313	0.111161	-0.399013
A_23_P114616	81573	ANKRD13C	0.00177207	0.0177706	0.845337
A_23_P114626	462	SERPINC1	0.97055	0.980088	0.00764743
A_23_P114649	60672	MIIP	0.00569513	0.0296561	-0.8275
A_23_P114656	3065	HDAC1	0.00365977	0.0239124	-0.22164
A_23_P114662	1429	CRYZ	0.0165985	0.0548998	0.408268
A_23_P114670	27237	ARHGEF16	0.114021	0.205886	-0.277831
A_23_P114689	55616	ASAP3	0.947131	0.963995	-0.00906019
A_23_P114707	9563	H6PD	0.0166852	0.0550757	-0.419145
A_23_P114713	1580	CYP4B1	0.0073767	0.0340055	0.853026
A_23_P114736	3766	KCNJ10	0.0204795	0.0629379	-0.400625
A_23_P114740	3075	CFH	0.275246	0.392497	0.194424
A_23_P114774	10654	PMVK	0.00635696	0.0315615	-0.79354
A_23_P114783	142	PARP1	0.0238899	0.0694327	0.32385
A_23_P114808	51102	MECR	0.00160929	0.017178	-0.792341
A_23_P114814	58480	RHOU	0.010649	0.0419775	0.51438
A_23_P114826	64960	MRPS15	0.0475428	0.110866	-0.274033
A_23_P114839	2275	FHL3	0.16311	0.267031	-0.204869
A_23_P114857	30814	PLA2G2E	0.0216106	0.0650491	-0.860221
A_23_P114862	10218	ANGPTL7	0.411496	0.529331	0.266137
A_23_P114879	51361	HOOK1	0.000509577	0.013472	0.446827
A_23_P114883	2331	FMOD	0.0133516	0.0479559	0.619245
A_23_P114903	3310	HSPA6	0.0491157	0.11349	-0.450661
A_23_P114929	25874	BRP44	0.884117	0.920371	-0.017126
A_23_P114934	84944	MAEL	0.0735275	0.150867	0.306939
A_23_P114947	5997	RGS2	0.728642	0.803961	0.0301935
A_23_P114952	252839	TMEM9	0.00219632	0.0192426	-0.50461
A_23_P114968	5738	PTGFRN	0.00273253	0.0209477	-0.713795
A_23_P114983	84676	TRIM63	0.801019	0.859195	0.0474919
A_23_P115011	54507	ADAMTSL4	0.342405	0.460539	0.253318
A_23_P115021	88	ACTN2	0.122743	0.21702	0.389513
A_23_P115022	128218	TMEM125	0.0433395	0.103892	-0.694456
A_23_P115036	9670	IPO13	0.0135536	0.0483408	-0.898133
A_23_P115046	8891	EIF2B3	0.0108293	0.0423947	-0.397287
A_23_P115052	6016	RIT1	0.020796	0.0635443	0.297693
A_23_P115064	1382	CRABP2	0.126579	0.221898	-0.235814
A_23_P11507	26009	ZZZ3	0.000238445	0.0118007	0.703148
A_23_P115091	57111	RAB25	0.000493454	0.013472	-0.852285
A_23_P115105	26099	C1orf144	0.0368671	0.092831	-0.128884
A_23_P115118	656	BMP8B	0.0280129	0.0769689	-0.452615
A_23_P115124	81559	TRIM11	0.0169147	0.0555869	-0.877315
A_23_P115137	10542	HBXIP	0.331584	0.449762	0.157405
A_23_P115149	79084	WDR77	0.0151926	0.0519774	-0.267806
A_23_P115161	2532	DARC	0.0458009	0.10799	0.259396
A_23_P115167	23507	LRRC8B	0.00324943	0.0225769	-0.367745
A_23_P115190	4803	NGF	0.00375471	0.0242115	-0.610597
A_23_P115192	83417	FCRL4	0.091655	0.1759	-0.346711
A_23_P115200	83417	FCRL4	0.805533	0.862801	0.0390172
A_23_P115201	83417	FCRL4	0.493392	0.605624	-0.0996845
A_23_P115202	49860	CRNN	0.834618	0.884928	-0.0395122
A_23_P115215	6944	VPS72	0.0181411	0.0581237	-0.519901
A_23_P115223	10456	HAX1	0.00291951	0.021568	-0.451398
A_23_P115246	8547	FCN3	0.0763512	0.154756	-0.217131
A_23_P115261	183	AGT	0.224402	0.337177	0.273762
A_23_P115286	8915	BCL10	0.000667835	0.0138039	-0.544768
A_23_P115313	64222	TOR3A	0.00147332	0.016616	-0.260342
A_23_P115316	64222	TOR3A	0.00107003	0.0153908	-0.699574
A_23_P115331	27245	AHDC1	0.764219	0.831754	0.0567518
A_23_P115346	1939	EIF2D	0.150539	0.251975	-0.185053
A_23_P115356	8574	AKR7A2	0.0157011	0.0531275	-0.11181
A_23_P115366	51727	CMPK1	0.00226333	0.0194074	0.873847
A_23_P115375	653604	HIST2H3D	0.00117566	0.0156687	-0.293743
A_23_P115407	2944	GSTM1	0.16176	0.265298	-0.10014
A_23_P115417	23179	RGL1	0.564623	0.667634	-0.069177
A_23_P11543	2517	FUCA1	0.111822	0.20306	-0.121691
A_23_P115444	8995	TNFSF18	0.565096	0.667962	-0.176383
A_23_P115460	6146	RPL22	0.00239656	0.0197697	-0.383807
A_23_P115467	6276	S100A5	0.0115277	0.0439989	0.245317
A_23_P115478	29943	PADI1	0.376431	0.495002	-0.199568
A_23_P115482	29089	UBE2T	0.403058	0.521224	0.0569738
A_23_P115492	79805	VASH2	1.04e-06	0.000833478	-0.456518
A_23_P115519	84648	LCE3D	0.11379	0.205587	-0.23012
A_23_P115523	65094	JMJD4	0.0037637	0.0242462	-1.08725
A_23_P115534	79932	KIAA0319L	0.0243096	0.0701898	-0.729096
A_23_P115563	81472	OR2C3	0.601554	0.699094	0.208848
A_23_P115573	149345	SHISA4	0.044791	0.106244	-0.290787
A_23_P115597	22852	ANKRD26	0.0237202	0.0691356	0.380026
A_23_P115608	57584	ARHGAP21	0.00979293	0.0398679	0.699557
A_23_P115616	NA		0.0570045	0.12596	-0.197282
A_23_P115636	1787	TRDMT1	0.00876052	0.0374694	0.617417
A_23_P11564	9813	KIAA0494	0.0293745	0.0795006	-0.263266
A_23_P115645	10659	CELF2	0.459768	0.57535	0.0966891
A_23_P115652	653509	SFTPA1	0.0196294	0.0611527	-0.426032
A_23_P115683	79803	HPS6	0.099305	0.186364	0.327691
A_23_P115699	5662	PSD	0.694232	0.776313	0.0498191
A_23_P115703	84108	PCGF6	0.00969056	0.0396362	0.483123
A_23_P115726	220963	SLC16A9	0.514446	0.624087	0.0951601
A_23_P115732	648	BMI1	0.000558964	0.0136786	0.956013
A_23_P115743	63877	FAM204A	0.784429	0.84696	0.0498541
A_23_P115762	11319	ECD	0.356532	0.474783	-0.0643552
A_23_P115780	26103	LRIT1	0.0323539	0.0849511	0.42732
A_23_P115785	92565	FANK1	0.100145	0.187434	0.238862
A_23_P115792	59338	PLEKHA1	0.55946	0.663193	0.083772
A_23_P115805	93426	SYCE1	0.00643619	0.0317462	0.229115
A_23_P115824	3189	HNRNPH3	0.00127789	0.0159601	0.621105
A_23_P115838	26148	C10orf12	0.0410193	0.10013	0.349116
A_23_P115842	55749	CCAR1	0.00294697	0.0216408	1.11078
A_23_P115861	220992	ZNF485	0.824536	0.877121	0.0251509
A_23_P115862	118881	COMTD1	0.0115486	0.0440376	-0.653745
A_23_P115872	55165	CEP55	0.000983987	0.0150087	0.798217
A_23_P115885	9562	MINPP1	0.36536	0.483686	0.134358
A_23_P115902	NA		3.09e-06	0.00151621	-0.824331
A_23_P115919	5264	PHYH	0.0973252	0.183632	0.186548
A_23_P115922	1979	EIF4EBP2	0.011145	0.0430999	0.583433
A_23_P115932	338567	KCNK18	0.977172	0.98452	-0.00483923
A_23_P115955	219927	MRPL21	0.147115	0.247679	-0.247968
A_23_P11598	127396	ZNF684	0.017548	0.0568366	0.476105
A_23_P115998	6688	SPI1	0.566296	0.668937	0.123803
A_23_P116007	9479	MAPK8IP1	0.044278	0.105399	-0.567208
A_23_P116013	10929	SRSF8	0.96796	0.97855	-0.00643449
A_23_P116016	10929	SRSF8	0.000855268	0.014366	1.13347
A_23_P116025	9440	MED17	0.00358718	0.0236885	0.56683
A_23_P116037	7108	TM7SF2	0.00233611	0.0196226	-0.457914
A_23_P116081	84153	RNASEH2C	0.0012019	0.0157043	-0.729483
A_23_P116091	10072	DPP3	0.000700017	0.0139054	-0.643131
A_23_P116114	5140	PDE3B	0.0943042	0.179515	0.340409
A_23_P116123	1111	CHEK1	0.00456931	0.0266628	0.492261
A_23_P116145	414301	DDI1	0.112682	0.204161	0.341624
A_23_P116168	84437	KIAA1826	0.000901824	0.0146261	0.840816
A_23_P116173	120376	C11orf93	0.0764257	0.154876	0.339732
A_23_P116187	83875	BCO2	0.250252	0.365943	0.1697
A_23_P116195	NA		0.104065	0.192859	0.253936
A_23_P116207	56912	IFT46	0.000388506	0.0131484	-0.429428
A_23_P116235	4192	MDK	0.0527029	0.119172	0.238742
A_23_P116249	2900	GRIK4	0.483731	0.596858	-0.124048
A_23_P116259	55800	SCN3B	0.372505	0.490878	-0.111759
A_23_P116264	4900	NRGN	0.169211	0.274335	-0.614105
A_23_P116280	7490	WT1	0.316078	0.433737	-0.070161
A_23_P116286	272	AMPD3	0.167707	0.272672	0.244664
A_23_P11629	199964	TMEM61	0.923074	0.947778	-0.0115294
A_23_P116371	931	MS4A1	0.192192	0.301023	-0.243102
A_23_P116376	79869	CPSF7	0.0741807	0.151812	0.398155
A_23_P116387	3619	INCENP	0.00593121	0.0303557	0.522485
A_23_P116414	11145	PLA2G16	0.96095	0.973724	0.00695794
A_23_P116430	10083	USH1C	0.0267493	0.0746271	-0.68675
A_23_P116435	51214	IGF2AS	0.27151	0.388522	0.425456
A_23_P11644	6703	SPRR2D	0.827149	0.879215	-0.0513548
A_23_P116473	NA		0.339416	0.457569	-0.206108
A_23_P116512	79899	PRR5L	0.00107358	0.0153936	1.31364
A_23_P11652	7398	USP1	0.000439219	0.0133409	1.22068
A_23_P116523	NA		0.274512	0.391736	-0.200739
A_23_P116533	23075	SWAP70	0.00179971	0.0178788	0.613833
A_23_P116557	3965	LGALS9	0.207814	0.318543	-0.519964
A_23_P116578	51585	PCF11	0.196508	0.305787	0.16603
A_23_P116587	4975	OMP	0.0866412	0.169259	-0.325661
A_23_P116602	57558	USP35	0.136657	0.234741	-0.288198
A_23_P116614	10873	ME3	0.179572	0.286232	-0.256576
A_23_P116624	9152	SLC6A5	0.259443	0.375858	0.0865471
A_23_P11664	9295	SRSF11	0.0478031	0.111296	0.315256
A_23_P116640	79345	OR51B2	0.839311	0.888344	0.0441231
A_23_P116642	65012	SLC26A10	0.406519	0.524558	-0.158633
A_23_P116653	79370	BCL2L14	0.481377	0.594866	0.0754426
A_23_P116679	5036	PA2G4	0.0336847	0.0872346	-0.358699
A_23_P116682	6601	SMARCC2	0.323258	0.441154	0.243555
A_23_P116694	6231	RPS26	0.645167	0.736389	-0.16495
A_23_P116712	11228	RASSF8	0.0787356	0.158096	-0.657379
A_23_P11674	5737	PTGFR	0.741763	0.814317	0.0869527
A_23_P116741	9271	PIWIL1	0.207494	0.318099	0.262692
A_23_P116743	338799	LOC338799	0.0751958	0.153211	-0.369721
A_23_P116765	3906	LALBA	0.270092	0.38714	0.446135
A_23_P116797	60314	C12orf10	0.00588169	0.0302078	-0.776444
A_23_P116809	22818	COPZ1	0.112663	0.20415	-0.212703
A_23_P116829	7334	UBE2N	0.0016721	0.0174089	0.499954
A_23_P116840	60673	C12orf44	0.000759798	0.0141294	-0.883651
A_23_P11685	5321	PLA2G4A	0.00110537	0.0154487	0.906927
A_23_P116850	3849	KRT2	0.637891	0.730199	0.0738738
A_23_P116868	53919	SLCO1C1	0.198854	0.308358	0.335693
A_23_P116872	5545	PRB4	0.859779	0.902736	0.0319917
A_23_P116890	5544	PRB3	0.0126912	0.0464754	0.278672
A_23_P116898	2	A2M	0.89081	0.92513	0.0265856
A_23_P116902	420	ART4	0.130418	0.22693	0.30709
A_23_P116913	121536	AEBP2	0.0078086	0.0351122	-0.785786
A_23_P116942	3902	LAG3	0.583615	0.683586	0.0787697
A_23_P11697	127540	HMGB4	0.0500861	0.115056	-0.301859
A_23_P116980	7289	TULP3	0.000366008	0.01297	-0.698105
A_23_P116999	51184	GPN3	0.0976466	0.184052	0.213857
A_23_P1170	93550	ANUBL1	0.00434851	0.0260504	0.28473
A_23_P117037	25875	LETMD1	0.194578	0.303704	-0.156453
A_23_P11705	55108	BSDC1	0.463893	0.579071	-0.124801
A_23_P117059	9194	SLC16A7	0.00921994	0.0384751	0.71889
A_23_P117068	6636	SNRPF	0.0073253	0.0338752	0.400719
A_23_P117082	50865	HEBP1	0.0074009	0.0340811	0.532281
A_23_P117095	8074	FGF23	0.0625727	0.134389	-0.3636
A_23_P117104	362	AQP5	0.0258189	0.0729296	0.435427
A_23_P117125	5916	RARG	0.2604	0.376806	0.176383
A_23_P11713	8073	PTP4A2	0.559099	0.662957	-0.0557719
A_23_P117146	11108	PRDM4	0.503569	0.6144	0.0355278
A_23_P117157	8803	SUCLA2	0.0223622	0.0665058	0.486928
A_23_P117163	55213	RCBTB1	0.00105224	0.0153406	1.00126
A_23_P117175	143	PARP4	8.22e-05	0.00840724	0.481952
A_23_P117190	29103	DNAJC15	0.0212691	0.0644186	0.286823
A_23_P117198	78988	MRP63	0.00299249	0.0217949	0.554629
A_23_P117225	2073	ERCC5	0.119666	0.21292	-0.239312
A_23_P117238	79587	CARS2	0.0103016	0.0411382	-0.261505
A_23_P117242	6541	SLC7A1	0.0221474	0.066102	-0.384519
A_23_P117261	122042	RXFP2	0.718742	0.796043	0.0805317
A_23_P117274	4285	MIPEP	0.670744	0.757673	-0.0337761
A_23_P117286	1203	CLN5	0.251056	0.366766	0.184869
A_23_P11729	51043	ZBTB7B	0.144171	0.244065	-0.41829
A_23_P117298	2155	F7	0.0198267	0.0615861	0.392389
A_23_P1173	3026	HABP2	0.60942	0.705686	-0.0835109
A_23_P117302	NA		0.286331	0.403681	-0.166067
A_23_P117346	8816	DCAF5	0.029447	0.0796181	-0.510473
A_23_P117363	866	SERPINA6	0.0948653	0.18031	0.518961
A_23_P117380	90050	FAM181A	0.487591	0.600391	-0.0603517
A_23_P117387	117153	MIA2	0.206344	0.316795	0.485683
A_23_P11739	83881	MIXL1	0.575533	0.676806	0.274216
A_23_P117411	2290	FOXG1	0.105832	0.195253	0.469449
A_23_P117416	2972	BRF1	0.0166138	0.0549405	-0.7431
A_23_P11742	375260	WASH2P	0.00352952	0.023534	-0.667928
A_23_P117424	80344	DCAF11	0.0117151	0.0444044	-0.609128
A_23_P117437	64806	IL25	0.642009	0.733677	-0.0689338
A_23_P11744	100287171	WASH1	0.012962	0.0470677	-0.858549
A_23_P117447	55017	C14orf119	0.0746969	0.152502	-0.290855
A_23_P117464	122664	TPPP2	0.0074314	0.034182	0.392621
A_23_P117480	NA		0.895503	0.928572	-0.0167191
A_23_P117494	4522	MTHFD1	0.455254	0.571244	-0.0649026
A_23_P117506	51635	DHRS7	0.798564	0.857435	-0.0336034
A_23_P117515	5926	ARID4A	0.0162743	0.0541972	0.340844
A_23_P11752	4985	OPRD1	0.0819532	0.16285	-0.267029
A_23_P117527	55030	FBXO34	0.00100292	0.0151135	0.46827
A_23_P117540	6815	STYX	0.983568	0.988765	0.00144336
A_23_P117546	6655	SOS2	0.000775178	0.0141974	1.08057
A_23_P117558	2287	FKBP3	0.0390106	0.0967771	0.271121
A_23_P117580	957	ENTPD5	0.166877	0.271646	-0.120869
A_23_P117582	122953	JDP2	0.005925	0.0303315	-0.47398
A_23_P117599	10598	AHSA1	0.00638209	0.0316557	-0.480679
A_23_P117602	3002	GZMB	0.773594	0.838994	0.0560104
A_23_P117623	55775	TDP1	0.172672	0.278427	-0.131392
A_23_P117635	4287	ATXN3	0.157558	0.260165	-0.110324
A_23_P11764	26523	EIF2C1	0.00525571	0.0285107	-0.464425
A_23_P117654	4644	MYO5A	0.00310665	0.0221441	0.631069
A_23_P117662	3067	HDC	0.180164	0.286948	0.205735
A_23_P117679	7782	SLC30A4	0.823216	0.875966	0.0253929
A_23_P117683	25764	C15orf63	0.000678332	0.0138437	-0.350361
A_23_P117694	10391	CORO2B	0.0267103	0.0745438	-0.386308
A_23_P117721	6218	RPS17	0.807559	0.864196	-0.0986272
A_23_P117727	123263	MTFMT	0.0159697	0.0536453	-0.310032
A_23_P117734	145748	LYSMD4	0.0240891	0.0698087	-0.385004
A_23_P11774	51118	UTP11L	0.536727	0.643523	0.047932
A_23_P117743	140460	ASB7	0.0242115	0.0700118	0.501509
A_23_P117759	145781	GCOM1	0.107819	0.197922	0.170684
A_23_P117767	54939	COMMD4	0.000276177	0.012123	-0.7139
A_23_P117778	84993	UBL7	0.00846558	0.0367972	-0.461951
A_23_P117782	55323	LARP6	0.282764	0.400073	0.182049
A_23_P117797	54982	CLN6	0.0137448	0.0486989	-0.608491
A_23_P117805	8128	ST8SIA2	0.206327	0.316795	0.331277
A_23_P117828	NA		0.542593	0.648543	-0.137401
A_23_P117833	54893	MTMR10	0.44338	0.56003	-0.124369
A_23_P117851	594855	CPLX3	0.0235261	0.0687163	-0.681449
A_23_P117852	9768	KIAA0101	0.00583289	0.0300596	0.828778
A_23_P117862	56160	NDNL2	0.00630347	0.0314058	0.787816
A_23_P11787	54361	WNT4	0.470733	0.585436	-0.247755
A_23_P117873	1133	CHRM5	0.103201	0.191689	0.412367
A_23_P117882	1381	CRABP1	0.216559	0.328314	0.674561
A_23_P117896	116179	TGM7	0.840437	0.889098	0.0334638
A_23_P117912	171177	RHOV	0.00245444	0.0199978	-1.22419
A_23_P117928	22893	BAHD1	0.201409	0.311191	0.0688032
A_23_P117933	2653	GCSH	0.000557525	0.0136786	1.16797
A_23_P117943	NA		0.0843042	0.166137	0.183765
A_23_P117955	353	APRT	0.00572616	0.0297483	-0.568319
A_23_P117971	NA		0.000304497	0.0125504	-0.755003
A_23_P117980	10300	KATNB1	0.0575789	0.126867	-0.375309
A_23_P117992	9914	ATP2C2	0.032692	0.0855757	-0.731678
A_23_P118	2135	EXTL2	0.00131614	0.0160355	0.535852
A_23_P11800	55450	CAMK2N1	0.801021	0.859195	0.0290503
A_23_P118002	7385	UQCRC2	0.00171819	0.01757	0.515701
A_23_P118018	283897	C16orf54	0.384792	0.503555	0.193282
A_23_P118025	64174	DPEP2	0.935378	0.956157	0.0124331
A_23_P118038	10204	NUTF2	7.09e-05	0.0081429	-1.0507
A_23_P118042	55282	LRRC36	0.835955	0.885843	-0.0258138
A_23_P11806	1301	COL11A1	0.635958	0.728516	0.0926438
A_23_P118061	51192	CKLF	0.394326	0.512859	0.11336
A_23_P118065	3294	HSD17B2	0.0204357	0.0628366	-0.442394
A_23_P118086	124044	SPATA2L	0.0354354	0.090329	-0.257249
A_23_P118095	6123	RPL3L	0.268994	0.386066	-0.165201
A_23_P118105	4716	NDUFB10	0.036408	0.0920532	-0.417551
A_23_P118113	6650	SOLH	0.184465	0.291965	-0.21608
A_23_P118122	8786	RGS11	0.0908351	0.174785	-0.397858
A_23_P118135	NA		0.0230693	0.0678607	-0.469246
A_23_P118150	23204	ARL6IP1	0.0448548	0.106334	0.26536
A_23_P118158	9956	HS3ST2	0.109974	0.200764	-0.465798
A_23_P118174	5347	PLK1	0.0467393	0.109525	-0.465239
A_23_P118185	83752	LONP2	0.0927343	0.177329	0.181521
A_23_P118195	NA		0.678938	0.764049	0.106454
A_23_P118203	124220	ZG16B	0.0490274	0.113358	0.289573
A_23_P118234	221223	CES5A	0.732278	0.806969	-0.0644189
A_23_P118246	51659	GINS2	0.0122715	0.0455695	-0.235059
A_23_P118254	2294	FOXF1	0.239905	0.35429	0.157045
A_23_P118266	463	ZFHX3	0.000287255	0.0122293	0.440701
A_23_P118289	9274	BCL7C	0.0059324	0.0303558	-0.730004
A_23_P118300	81889	FAHD1	0.232296	0.34598	0.20118
A_23_P118306	9093	DNAJA3	0.87794	0.915713	0.012384
A_23_P118313	11345	GABARAPL2	0.00299281	0.0217949	0.672983
A_23_P118327	55623	THUMPD1	0.00460771	0.0267928	0.417252
A_23_P118334	64282	PAPD5	0.25683	0.373196	-0.0722295
A_23_P118353	6730	SRP68	0.00130455	0.0160249	-0.424927
A_23_P118370	NA		0.00334432	0.0228986	-0.717039
A_23_P118392	51655	RASD1	0.001416	0.0164245	1.10771
A_23_P118406	79415	C17orf62	0.0326041	0.0854492	-0.487425
A_23_P11841	493	ATP2B4	0.313692	0.431358	-0.120834
A_23_P118412	283987	C17orf28	0.0870841	0.169827	-0.695627
A_23_P118427	5606	MAP2K3	0.00315889	0.0222993	-0.857837
A_23_P11843	10446	LRRN2	0.0555401	0.12361	-0.393186
A_23_P118435	6613	SUMO2	0.275509	0.392777	0.169787
A_23_P118451	10948	STARD3	0.00538388	0.0288301	-0.493456
A_23_P118462	124641	OVCA2	0.00146999	0.0165987	-0.289777
A_23_P118493	10040	TOM1L1	0.00872283	0.0373744	0.500944
A_23_P118516	51030	FAM18B1	0.00460591	0.0267862	0.787953
A_23_P118536	55106	SLFN12	0.00255658	0.0203573	0.978342
A_23_P118544	1213	CLTC	0.028048	0.0770171	0.253398
A_23_P118552	10614	HEXIM1	0.00664916	0.0322851	0.842878
A_23_P118571	50964	SOST	0.770624	0.836749	0.0454256
A_23_P118581	92591	ASB16	0.00035317	0.0128137	-0.647595
A_23_P11859	51478	HSD17B7	0.000250591	0.0118419	-0.470198
A_23_P1186	389941	C1QL3	0.139794	0.238567	-0.189094
A_23_P118607	80755	AARSD1	0.000622588	0.0137757	-0.704451
A_23_P118615	10351	ABCA8	0.226834	0.340056	0.280003
A_23_P11862	55732	C1orf112	0.0345146	0.0886988	0.272106
A_23_P118633	64847	SPATA20	0.0258081	0.0729143	-0.371979
A_23_P118643	1977	EIF4E	0.00243854	0.0199481	1.03502
A_23_P118649	1977	EIF4E	0.345105	0.463304	0.143736
A_23_P118660	11056	DDX52	0.168046	0.272951	0.13777
A_23_P118675	3211	HOXB1	0.203877	0.31414	-0.145242
A_23_P118690	7756	ZNF207	0.00625225	0.0312957	0.326222
A_23_P118693	8456	FOXN1	0.345641	0.463809	0.110749
A_23_P118705	6388	SDF2	0.0324145	0.0850502	0.210545
A_23_P118712	85464	SSH2	0.0265094	0.0741958	0.313997
A_23_P118722	432	ASGR1	0.828442	0.880225	-0.029313
A_23_P11874	9019	MPZL1	0.2059	0.31633	0.150221
A_23_P118741	201232	SLC16A13	0.018667	0.0591961	-0.87401
A_23_P118749	51009	DERL2	0.00510871	0.0281972	-0.279893
A_23_P118774	3837	KPNB1	0.0110724	0.0429309	-0.426904
A_23_P118791	84314	TMEM107	0.00463507	0.0268795	0.88821
A_23_P118815	332	BIRC5	0.00564405	0.0295387	-0.824229
A_23_P118834	7153	TOP2A	0.317638	0.435354	0.100693
A_23_P118842	83895	KRTAP1-5	0.0115169	0.0439739	0.91189
A_23_P118854	8688	KRT37	0.016657	0.0550179	-0.423633
A_23_P118888	5048	PAFAH1B1	0.000866874	0.0144714	-0.439281
A_23_P118894	79170	PRR15L	0.0480471	0.111711	0.540479
A_23_P118909	56984	PSMG2	0.557327	0.661509	-0.0734315
A_23_P118916	80148	PQLC1	0.0317746	0.0839536	-0.656847
A_23_P118946	9331	B4GALT6	0.838593	0.887835	-0.0226332
A_23_P118967	284217	LAMA1	0.491665	0.603937	0.0929692
A_23_P119006	NA		0.149893	0.251138	-0.198929
A_23_P119015	5275	SERPINB13	0.743489	0.815687	-0.070587
A_23_P11902	NA		0.0726744	0.149641	-0.35743
A_23_P119023	201475	RAB12	2.79e-05	0.00517434	-0.409906
A_23_P119040	80000	GREB1L	0.00836808	0.0365107	-0.70793
A_23_P119042	4818	NKG7	0.917673	0.943729	0.0136279
A_23_P119084	90233	ZNF551	0.224827	0.337591	-0.102298
A_23_P119095	10848	PPP1R13L	0.0208417	0.063644	-0.665431
A_23_P119102	7408	VASP	0.331088	0.449252	0.103019
A_23_P119130	6223	RPS19	0.175108	0.281337	-0.48432
A_23_P119141	9817	KEAP1	0.00705827	0.0331792	-0.391538
A_23_P119143	7087	ICAM5	0.801022	0.859195	-0.0286078
A_23_P11915	54834	GDAP2	0.451053	0.567362	0.132459
A_23_P119152	NA		0.26258	0.379157	-0.192786
A_23_P119168	NA		0.386934	0.505619	-0.132297
A_23_P119196	10365	KLF2	0.664347	0.752646	-0.0890257
A_23_P119202	970	CD70	0.877051	0.915112	0.0148917
A_23_P119214	10469	TIMM44	0.00107465	0.0153952	-0.572829
A_23_P11922	NA		0.160372	0.263601	-0.250834
A_23_P119222	56729	RETN	0.0752856	0.153316	0.184716
A_23_P119254	55723	ASF1B	0.0180034	0.0578443	-0.395708
A_23_P11926	NA		0.571394	0.673387	0.0698644
A_23_P119266	1777	DNASE2	7.9e-05	0.00836955	-0.598043
A_23_P119295	51295	ECSIT	0.016342	0.0543321	-0.761458
A_23_P119311	284366	KLK9	0.135284	0.232916	-0.365592
A_23_P119322	114132	SIGLEC11	0.0020483	0.0186633	-1.74348
A_23_P119337	22809	ATF5	0.00422535	0.0256732	-0.799538
A_23_P119344	8463	TEAD2	0.221006	0.333342	0.293374
A_23_P119353	54922	RASIP1	0.144797	0.244771	-0.2498
A_23_P11936	91544	UBXN11	0.0246045	0.070762	-0.805508
A_23_P119362	2014	EMP3	0.00273142	0.0209477	-0.662885
A_23_P119377	9266	CYTH2	0.00145815	0.0165616	-0.521167
A_23_P119390	30846	EHD2	0.122822	0.217103	-0.19532
A_23_P119395	2696	GIPR	0.655178	0.744871	-0.111323
A_23_P119407	NA		0.00319523	0.0224032	-0.40136
A_23_P119418	8725	C19orf2	0.0892406	0.172718	-0.117818
A_23_P119448	22870	PPP6R1	0.442371	0.559152	0.188474
A_23_P119458	8193	DPF1	0.0250368	0.0715387	-0.764558
A_23_P119464	85415	RHPN2	0.205719	0.316159	-0.13445
A_23_P119478	10148	EBI3	0.270131	0.387143	-0.0627114
A_23_P119500	126282	TNFAIP8L1	0.248141	0.363617	-0.157169
A_23_P119502	8698	S1PR4	0.106327	0.195933	-0.320505
A_23_P119526	8943	AP3D1	0.000684762	0.0138582	-0.715135
A_23_P119535	1943	EFNA2	0.0384646	0.0957675	-0.238895
A_23_P119543	10362	HMG20B	0.169755	0.275053	-0.23785
A_23_P119562	1675	CFD	0.0309764	0.0825315	-0.482717
A_23_P119573	3780	KCNN1	0.014324	0.0499963	0.318365
A_23_P119583	5143	PDE4C	0.00145137	0.0165616	-0.766954
A_23_P119593	79852	EPHX3	0.464043	0.57916	0.249944
A_23_P119611	53822	FXYD7	0.22973	0.343193	-0.215248
A_23_P119617	57794	SUGP1	0.0078941	0.03533	-0.807423
A_23_P119627	51079	NDUFA13	0.00198231	0.0183755	-0.599591
A_23_P119634	11045	UPK1A	0.0566787	0.125463	-0.28303
A_23_P119677	3191	HNRNPL	0.00277644	0.0210764	-0.817682
A_23_P11968	2980	GUCA2A	0.414154	0.531682	-0.0799813
A_23_P119683	54531	MIER2	0.110249	0.201094	-0.360084
A_23_P119698	51293	CD320	0.00212327	0.0189495	-0.729138
A_23_P119714	29086	BABAM1	0.00163398	0.0172802	-0.867822
A_23_P119732	22835	ZFP30	0.670386	0.757359	0.080129
A_23_P119735	22835	ZFP30	0.33988	0.458074	0.1653
A_23_P119753	23301	EHBP1	0.191671	0.30046	0.15447
A_23_P119763	64240	ABCG5	0.3042	0.421729	-0.183967
A_23_P119778	57181	SLC39A10	0.00702267	0.0331182	0.476993
A_23_P119789	79134	TMEM185B	0.403242	0.521362	0.0923922
A_23_P119794	NA		0.0483132	0.112153	0.413823
A_23_P11980	100509924	LOC100509924	0.500887	0.612131	-0.173733
A_23_P119812	2820	GPD2	0.000586953	0.013772	0.807649
A_23_P119835	58484	NLRC4	0.545328	0.650976	0.111818
A_23_P11984	6536	SLC6A9	0.151007	0.252521	-0.17043
A_23_P119850	NA		0.527892	0.635753	0.109985
A_23_P119857	130502	TTC32	0.000762743	0.0141434	0.670249
A_23_P119886	2646	GCKR	0.0491163	0.11349	0.216325
A_23_P119899	2043	EPHA4	0.00410462	0.025365	0.195728
A_23_P1199	11164	NUDT5	0.0806694	0.160954	-0.139124
A_23_P119907	55139	ANKZF1	0.00790003	0.0353447	-0.46076
A_23_P119916	7475	WNT6	0.45241	0.568442	-0.171371
A_23_P119923	26504	CNNM4	0.00088844	0.014569	1.1212
A_23_P119936	5068	REG3A	0.199854	0.309477	0.19247
A_23_P119943	3485	IGFBP2	0.471289	0.585949	-0.0913419
A_23_P11995	5052	PRDX1	0.0758308	0.153983	-0.20505
A_23_P119964	10153	CEBPZ	0.0454175	0.107334	0.277962
A_23_P119992	7444	VRK2	0.00146836	0.0165848	0.58232
A_23_P120002	3431	SP110	0.853575	0.898703	-0.0201859
A_23_P120048	29994	BAZ2B	0.000573837	0.0137182	0.828424
A_23_P120056	6242	RTKN	0.00951591	0.0391916	-1.00099
A_23_P120062	6936	C2orf3	0.105308	0.194498	-0.140128
A_23_P12010	51093	RRNAD1	0.0328946	0.085922	-0.32887
A_23_P120103	3790	KCNS3	0.0151517	0.0518589	0.790264
A_23_P120125	78989	COLEC11	0.230779	0.344271	0.380024
A_23_P120146	9392	TGFBRAP1	0.0310801	0.0827081	-0.667
A_23_P120153	284996	RNF149	0.00225034	0.0193791	0.632715
A_23_P120170	200765	TIGD1	0.0218582	0.0655443	-0.327428
A_23_P12018	23208	SYT11	0.905914	0.935568	-0.0166827
A_23_P120182	4705	NDUFA10	0.00192655	0.0182424	-0.39206
A_23_P120194	94101	ORMDL1	0.00286948	0.0214218	0.371345
A_23_P120227	81606	LBH	0.00307849	0.0220399	0.227239
A_23_P120237	56910	STARD7	0.524673	0.632992	0.0440564
A_23_P120243	3231	HOXD1	0.209526	0.320376	0.436813
A_23_P120254	56940	DUSP22	0.160334	0.263571	-0.208074
A_23_P120270	90411	MCFD2	0.0304906	0.0816854	0.332506
A_23_P120281	10913	EDAR	0.352579	0.470641	0.0987789
A_23_P120316	10797	MTHFD2	0.000726049	0.0140229	1.01043
A_23_P120325	3797	KIF3C	0.521537	0.630396	0.0579402
A_23_P120335	10651	MTX2	0.0179007	0.0576573	0.385835
A_23_P120345	57162	PELI1	0.00150274	0.016747	0.709276
A_23_P120354	65124	ANKRD57	0.0310481	0.0826444	-0.293763
A_23_P120364	79144	PPDPF	0.679294	0.764277	0.12844
A_23_P120378	NA		0.649787	0.740158	-0.0671983
A_23_P120414	7529	YWHAB	0.00109225	0.0154298	0.846019
A_23_P120428	27296	TP53TG5	0.0526817	0.11913	0.396301
A_23_P120435	140686	WFDC3	0.0118471	0.0446445	-0.788835
A_23_P12044	55092	TMEM51	0.589202	0.68828	-0.0503021
A_23_P120442	8202	NCOA3	0.107484	0.197516	0.196863
A_23_P120458	55905	RNF114	0.00319639	0.0224032	-0.357873
A_23_P120467	55734	ZFP64	0.455701	0.571589	0.141657
A_23_P120472	7022	TFAP2C	0.00489027	0.0276363	0.347034
A_23_P120488	79716	NPEPL1	0.0123666	0.0457773	-0.481505
A_23_P120504	55321	C20orf46	0.0196405	0.0611762	-0.641569
A_23_P120513	128653	C20orf141	0.00987579	0.0400989	-0.919303
A_23_P12053	23013	SPEN	0.00493032	0.0277253	0.406648
A_23_P120545	164312	LRRN4	0.0663038	0.140144	0.354956
A_23_P120557	55617	TASP1	0.0631959	0.135274	0.216544
A_23_P120566	6238	RRBP1	0.00556793	0.0293609	-0.855843
A_23_P120572	54453	RIN2	0.0026981	0.0208404	-0.849987
A_23_P120588	140880	CST11	0.678835	0.764049	-0.0525999
A_23_P120594	84532	ACSS1	0.0407085	0.099603	-0.519045
A_23_P1206	6229	RPS24	0.44579	0.562277	0.255415
A_23_P120606	NA		0.000963966	0.0149198	-1.07254
A_23_P12062	54802	TRIT1	0.00763504	0.0346778	0.331114
A_23_P120629	434	ASIP	0.0116798	0.0443114	-0.393174
A_23_P120644	NA		0.393446	0.511958	0.0883731
A_23_P120660	6227	RPS21	0.774043	0.839261	-0.125713
A_23_P120667	58494	JAM2	0.152869	0.254617	0.284274
A_23_P120694	9992	KCNE2	0.268207	0.38522	0.204915
A_23_P120710	7267	TTC3	0.0776595	0.156652	0.143693
A_23_P120744	8888	MCM3AP	0.0649887	0.138095	-0.265226
A_23_P120776	6576	SLC25A1	0.00770659	0.0348772	-0.751819
A_23_P120784	27037	TRMT2A	0.0550691	0.122869	-0.488052
A_23_P12079	3749	KCNC4	0.00871004	0.0373282	-0.616312
A_23_P120794	6545	SLC7A4	0.0947243	0.180118	-0.761672
A_23_P120809	2678	GGT1	0.0533531	0.120215	-0.402168
A_23_P120812	3543	IGLL1	0.107557	0.19761	-0.375023
A_23_P12082	1117	CHI3L2	0.285926	0.403266	-0.147213
A_23_P120822	51733	UPB1	0.0964349	0.182499	0.507099
A_23_P120839	24144	TFIP11	0.00535785	0.0287491	-0.387986
A_23_P120845	7494	XBP1	0.0124709	0.046018	0.348829
A_23_P120860	8508	NIPSNAP1	0.974416	0.982733	0.00401194
A_23_P120863	9514	GAL3ST1	0.450887	0.567287	0.16734
A_23_P120883	3162	HMOX1	0.787223	0.848926	-0.0325793
A_23_P120899	1439	CSF2RB	0.024171	0.0699424	-0.350038
A_23_P120902	3957	LGALS2	0.667674	0.755079	0.0847085
A_23_P120915	129138	ANKRD54	0.00768285	0.0348178	-0.519707
A_23_P120921	129138	ANKRD54	0.0160007	0.0536979	-0.45447
A_23_P120931	27350	APOBEC3C	0.0281733	0.0772698	-0.429721
A_23_P120933	468	ATF4	0.00890913	0.0377439	-0.825966
A_23_P120941	468	ATF4	0.00227975	0.0194669	-0.716171
A_23_P120942	2547	XRCC6	0.00393198	0.0247598	-0.827746
A_23_P120947	2547	XRCC6	0.000139753	0.0104753	-0.421009
A_23_P120953	253190	SERHL2	0.138041	0.236428	-0.312262
A_23_P120970	25809	TTLL1	0.0186951	0.0592668	-0.460019
A_23_P120973	55007	FAM118A	0.000213592	0.0115076	-0.79232
A_23_P120982	10343	PKDREJ	0.0195842	0.0610727	0.663689
A_23_P121	NA		0.608161	0.704586	0.0675231
A_23_P121011	64651	CSRNP1	0.273408	0.390473	-0.103752
A_23_P121013	51725	FBXO40	0.0423153	0.102241	-0.418292
A_23_P121030	1370	CPN2	0.63551	0.728144	0.0583427
A_23_P121037	50512	PODXL2	0.29246	0.409986	-0.444708
A_23_P121051	5096	PCCB	0.00273582	0.0209563	-0.40311
A_23_P121061	6769	STAC	0.112454	0.203884	-0.301728
A_23_P121064	5806	PTX3	0.0790417	0.158492	0.245459
A_23_P121082	2632	GBE1	0.000666059	0.0138039	1.16142
A_23_P121095	7155	TOP2B	0.000627608	0.0137757	0.63585
A_23_P121102	8820	HESX1	0.0141589	0.0496081	1.16596
A_23_P121106	8820	HESX1	0.0168137	0.055366	0.420789
A_23_P121120	53836	GPR87	0.0204331	0.0628333	0.325992
A_23_P121122	80218	NAA50	0.0171969	0.056114	0.312881
A_23_P12113	28982	FLVCR1	0.118706	0.2118	0.207555
A_23_P121141	28990	ASTE1	0.374736	0.493247	-0.0593602
A_23_P121144	131375	LYZL4	0.0634088	0.135659	0.300783
A_23_P121182	26061	HACL1	0.936678	0.956984	0.00481305
A_23_P121196	79188	TMEM43	0.894359	0.927693	0.0113621
A_23_P121215	8536	CAMK1	0.0113927	0.0437236	-0.459323
A_23_P121222	56852	RAD18	0.0030843	0.0220576	0.751089
A_23_P121234	NA		0.0594258	0.129689	-0.315851
A_23_P121250	1974	EIF4A2	0.0782635	0.157503	0.286749
A_23_P121253	8743	TNFSF10	0.497422	0.60903	-0.0803307
A_23_P121265	11344	TWF2	0.00111077	0.0154487	-0.460628
A_23_P121276	6787	NEK4	0.410939	0.52878	0.066537
A_23_P12128	7252	TSHB	0.287231	0.404606	-0.121242
A_23_P121282	440955	TMEM89	0.779802	0.843663	0.0275037
A_23_P121326	11068	CYB561D2	0.00609806	0.0308468	-0.539213
A_23_P121340	9942	XYLB	0.434221	0.551657	-0.0887696
A_23_P121345	55171	TBCCD1	0.196805	0.306085	0.247909
A_23_P121356	56987	BBX	0.576498	0.677708	-0.0683544
A_23_P121374	54437	SEMA5B	0.234133	0.348146	-0.105869
A_23_P121386	55081	IFT57	0.0096694	0.0396036	0.441308
A_23_P121396	131118	DNAJC19	0.0801378	0.160155	0.219151
A_23_P12140	6125	RPL5	0.217098	0.328899	-0.173729
A_23_P121405	29890	RBM15B	0.247349	0.362694	-0.101355
A_23_P121413	165721	DNAJB8	0.438201	0.555456	0.137972
A_23_P121423	993	CDC25A	0.00500919	0.0279692	-0.434158
A_23_P121441	22829	NLGN4Y	0.00245097	0.0199821	0.640098
A_23_P121447	84517	ARPM1	0.935899	0.956546	-0.0103522
A_23_P121459	7066	THPO	0.645528	0.736732	0.177498
A_23_P12147	148304	C1orf74	0.0891208	0.172559	-0.197146
A_23_P121480	4345	CD200	0.528753	0.636468	0.137749
A_23_P121489	55773	TBC1D23	0.0630399	0.13506	0.175104
A_23_P121499	7466	WFS1	0.00768521	0.0348247	-0.705439
A_23_P121506	8603	FAM193A	0.00988782	0.0401228	-0.317645
A_23_P121527	51088	KLHL5	0.000456668	0.0134008	0.86602
A_23_P121533	10417	SPON2	0.754163	0.823476	0.0645829
A_23_P121545	2823	GPM6A	0.0788119	0.158187	0.421177
A_23_P12155	54544	CRCT1	0.0417671	0.101364	-0.614376
A_23_P121564	2983	GUCY1B3	0.00555493	0.0293278	0.84122
A_23_P121573	NA		0.00874513	0.0374223	0.921823
A_23_P121586	8916	HERC3	0.209049	0.319861	0.407889
A_23_P121596	5473	PPBP	0.728297	0.803773	0.0334133
A_23_P121602	8819	SAP30	0.000623526	0.0137757	1.37746
A_23_P121614	4589	MUC7	0.0403072	0.0989104	0.142648
A_23_P121622	27284	SULT1B1	0.00891776	0.0377598	0.424212
A_23_P121637	8492	PRSS12	0.698078	0.779245	0.0496952
A_23_P121646	10568	SLC34A2	0.293389	0.411007	0.178546
A_23_P121657	9957	HS3ST1	0.0115877	0.0441257	0.320675
A_23_P121665	57537	SORCS2	0.133117	0.230143	-0.603624
A_23_P121676	80319	CXXC4	0.564826	0.667739	0.131978
A_23_P12168	5710	PSMD4	0.000557321	0.0136786	-0.874961
A_23_P121686	9255	AIMP1	0.000230106	0.0117489	-0.282866
A_23_P121695	10563	CXCL13	0.00314793	0.0222781	0.395677
A_23_P121702	132299	OCIAD2	0.81058	0.866365	-0.0206946
A_23_P121716	306	ANXA3	0.0114676	0.0438598	0.318991
A_23_P121722	55714	ODZ3	0.0873193	0.1701	-0.286582
A_23_P12173	200186	CRTC2	0.102735	0.191	0.252119
A_23_P121773	2483	FRG1	0.276828	0.394081	-0.177629
A_23_P12178	200186	CRTC2	0.227857	0.341253	-0.311638
A_23_P121783	79644	SRD5A3	0.45201	0.568182	-0.113906
A_23_P121795	8470	SORBS2	0.00502356	0.0280064	-0.971193
A_23_P121806	58478	ENOPH1	0.00279533	0.021128	0.665905
A_23_P121813	133121	ENPP6	0.08014	0.160155	0.250051
A_23_P121825	80006	C5orf44	0.000862845	0.0144218	1.00447
A_23_P121851	56121	PCDHB15	0.195472	0.304708	0.233975
A_23_P121869	11042	SMA5	0.0251623	0.0717724	-0.282155
A_23_P121875	64417	C5orf28	0.000591459	0.013772	1.00189
A_23_P121885	83853	ROPN1L	0.960371	0.973237	0.00651659
A_23_P12189	1676	DFFA	0.00108894	0.0154258	-0.638749
A_23_P121898	79668	PARP8	0.00219181	0.0192368	0.588527
A_23_P121914	1556	CYP2B7P1	0.195686	0.304935	0.351379
A_23_P121926	6414	SEPP1	0.0820847	0.163032	0.362114
A_23_P121939	79810	PTCD2	0.0780352	0.157205	-0.341851
A_23_P121945	6620	SNCB	0.00829872	0.0363163	-1.05026
A_23_P121956	54974	THG1L	0.000830555	0.014279	-0.572236
A_23_P121971	NA		0.149329	0.25046	0.281535
A_23_P121976	5459	POU4F3	0.0421915	0.102026	-0.331933
A_23_P121987	85480	TSLP	0.0376127	0.0942213	0.61155
A_23_P12199	115572	FAM46B	0.00170777	0.0175648	-1.05841
A_23_P122001	4437	MSH3	0.808657	0.865077	0.0240577
A_23_P122007	90355	C5orf30	0.00116263	0.0156666	1.21312
A_23_P122027	11127	KIF3A	0.291632	0.409147	-0.144421
A_23_P122041	5515	PPP2CA	0.0881105	0.171169	0.253312
A_23_P122052	493869	GPX8	0.0585924	0.12844	0.193682
A_23_P122067	114899	C1QTNF3	0.292339	0.409873	0.0994956
A_23_P122068	114899	C1QTNF3	0.757953	0.826667	-0.0151612
A_23_P122077	51301	GCNT4	0.196934	0.306205	0.353081
A_23_P122104	285590	SH3PXD2B	0.543695	0.649463	-0.0858016
A_23_P122116	51428	DDX41	0.0231735	0.0680543	-0.504086
A_23_P122127	2533	FYB	0.163003	0.26694	0.732987
A_23_P122134	56923	NMUR2	0.606606	0.70348	-0.0496615
A_23_P122144	133688	UGT3A1	0.678444	0.763762	-0.0514701
A_23_P122152	27039	PKD2L2	0.000671187	0.0138156	-0.416266
A_23_P122174	7518	XRCC4	0.967797	0.978513	-0.00364812
A_23_P122197	891	CCNB1	0.72021	0.797187	0.0295225
A_23_P122210	NA		0.214769	0.326288	-0.337883
A_23_P122216	4015	LOX	0.103561	0.192169	0.271914
A_23_P122228	4726	NDUFS6	1.89e-05	0.00434762	-0.712845
A_23_P122233	29093	MRPL22	0.863193	0.905069	0.0236316
A_23_P122254	9972	NUP153	0.000677867	0.0138437	0.673923
A_23_P122304	3066	HDAC2	0.00326733	0.0226404	0.968612
A_23_P12231	116983	ACAP3	0.0122921	0.04562	-0.297483
A_23_P122375	60685	ZFAND3	0.246889	0.362163	-0.0812021
A_23_P122387	55168	MRPS18A	0.00215981	0.0191335	-0.450819
A_23_P122393	65989	DLK2	0.00444903	0.0263233	-0.614462
A_23_P12241	55283	MCOLN3	0.735753	0.809649	-0.0409214
A_23_P122414	2978	GUCA1A	0.543535	0.649366	0.101998
A_23_P122439	10385	BTN2A2	0.00154755	0.0169259	0.721814
A_23_P122443	3006	HIST1H1C	0.00279035	0.0211154	-0.887013
A_23_P122464	7746	ZNF193	0.143684	0.243381	-0.133289
A_23_P122481	NA		0.952072	0.967666	0.0232756
A_23_P122485	NA		0.11278	0.204285	-0.299821
A_23_P122493	11074	TRIM31	0.115799	0.208153	0.619494
A_23_P122508	135656	DPCR1	0.320792	0.438646	0.390548
A_23_P122531	50854	C6orf48	0.761868	0.829724	-0.0385975
A_23_P122532	57827	C6orf47	0.0140539	0.0493712	-0.695565
A_23_P122545	7936	RDBP	0.00193215	0.0182572	-0.895893
A_23_P122563	10471	PFDN6	0.000168926	0.0108881	-0.829676
A_23_P122579	1616	DAXX	0.0856199	0.16786	-0.348247
A_23_P122582	64771	C6orf106	0.0381311	0.0951537	-0.575554
A_23_P122600	389383	C6orf126	0.193197	0.302112	-0.1618
A_23_P122615	25957	PNISR	0.21261	0.3238	0.193296
A_23_P122624	84946	LTV1	0.0201662	0.0622836	0.19659
A_23_P122650	NA		0.0120888	0.0451773	-1.17675
A_23_P122655	80078	FLJ13744	0.00702576	0.0331266	0.196248
A_23_P122662	54438	GFOD1	0.304976	0.422519	-0.206417
A_23_P122674	55003	PAK1IP1	0.00403066	0.0251071	-0.346457
A_23_P122688	NA		0.291875	0.409405	-0.276552
A_23_P12272	5511	PPP1R8	0.00265279	0.0206783	0.606663
A_23_P122724	8875	VNN2	0.889743	0.92435	-0.0215509
A_23_P122775	84816	RTN4IP1	0.00624486	0.0312815	-0.566235
A_23_P122782	6950	TCP1	0.00416174	0.0254856	0.567767
A_23_P122796	51020	HDDC2	0.0917895	0.176097	0.428431
A_23_P122805	84928	TMEM209	0.00111854	0.0154777	0.710269
A_23_P122815	813	CALU	0.0251827	0.0718093	-0.575152
A_23_P12282	8444	DYRK3	0.0805459	0.160747	0.287261
A_23_P122852	6604	SMARCD3	0.0274992	0.0760311	-0.535003
A_23_P122863	2887	GRB10	0.0113735	0.0436788	-0.517853
A_23_P122876	6878	TAF6	0.00075727	0.0141294	1.15499
A_23_P122896	7036	TFR2	0.249307	0.364992	-0.146604
A_23_P122906	26053	AUTS2	0.662054	0.75067	-0.052478
A_23_P122915	25798	BRI3	0.181738	0.288831	-0.208807
A_23_P12292	79098	C1orf116	0.0138883	0.0489868	-0.803812
A_23_P122924	3624	INHBA	0.00146805	0.0165848	-0.689558
A_23_P122937	9844	ELMO1	0.185542	0.293105	-0.297194
A_23_P122947	23080	AVL9	0.550671	0.655618	-0.02827
A_23_P122959	9865	TRIL	0.924385	0.948657	-0.0136251
A_23_P122976	2770	GNAI1	0.0100775	0.0405856	0.483229
A_23_P123010	9275	BCL7B	0.0229264	0.0675713	-0.394218
A_23_P123015	100505599	LOC100505599	0.750032	0.82049	-0.0543125
A_23_P123018	100505599	LOC100505599	0.00470827	0.0270821	-1.10969
A_23_P123022	7532	YWHAG	9.64e-06	0.00290567	-0.620718
A_23_P12303	84871	AGBL4	0.834638	0.884928	-0.0308198
A_23_P123039	11097	NUPL2	0.109456	0.200039	-0.187594
A_23_P123060	3696	ITGB8	0.000547108	0.0136625	-0.539075
A_23_P123071	858	CAV2	0.230458	0.343929	-0.186754
A_23_P123086	114796	KIAA1908	0.0814037	0.162039	-0.249964
A_23_P123096	2792	GNGT1	0.119369	0.212559	0.667206
A_23_P123108	10142	AKAP9	0.178527	0.285076	0.488574
A_23_P123112	5244	ABCB4	0.154788	0.256758	0.279176
A_23_P123125	83605	CCM2	0.00168187	0.017453	-0.947671
A_23_P123133	4967	OGDH	0.0824756	0.163642	-0.327286
A_23_P123164	89883	OR6W1P	0.529813	0.637283	0.161902
A_23_P123172	441295	OR2A9P	0.00144363	0.0165339	-0.28423
A_23_P123193	57180	ACTR3B	0.0017225	0.01757	0.857603
A_23_P123228	1811	SLC26A3	0.226797	0.340025	-0.229463
A_23_P123234	NA		0.132965	0.229966	-0.194172
A_23_P123242	57786	RBAK	0.00277194	0.021054	0.60618
A_23_P123256	11333	PDAP1	1.89e-10	1.55e-06	-1.16758
A_23_P123265	25870	SUMF2	0.000203206	0.0113127	-0.954502
A_23_P123276	8323	FZD6	0.0575473	0.126836	0.288951
A_23_P12329	51107	APH1A	0.00155334	0.0169621	-0.50526
A_23_P123308	56154	TEX15	0.0098522	0.0400222	0.479061
A_23_P123315	NA		0.00778566	0.0350675	0.318097
A_23_P123330	6156	RPL30	0.193252	0.302187	0.423228
A_23_P123336	54704	PDP1	0.000947586	0.0148513	0.51455
A_23_P123343	84955	NUDCD1	0.00164763	0.0173161	0.62516
A_23_P12336	55170	PRMT6	0.000736146	0.0140773	0.564265
A_23_P123362	NA		0.305258	0.422781	0.181259
A_23_P123393	3786	KCNQ3	0.556239	0.660693	-0.0937626
A_23_P123402	84675	TRIM55	0.66892	0.756154	0.0785856
A_23_P123413	9760	TOX	0.0187165	0.0593029	0.567176
A_23_P123424	1142	CHRNB3	0.73482	0.808973	0.0457778
A_23_P12343	2947	GSTM3	0.210284	0.321308	-0.105871
A_23_P123440	11160	ERLIN2	0.00708877	0.0332806	-0.41256
A_23_P123448	4325	MMP16	0.00240093	0.0197906	0.968006
A_23_P123454	79873	NUDT18	0.0119338	0.0448612	-1.00612
A_23_P123463	90459	ERI1	0.00193998	0.0182867	0.629706
A_23_P123466	90459	ERI1	0.105019	0.194125	0.274928
A_23_P123478	5150	PDE7A	0.280719	0.398057	-0.124664
A_23_P123488	63978	PRDM14	0.485651	0.598614	0.0932493
A_23_P123503	10221	TRIB1	0.749816	0.820324	-0.0356971
A_23_P123522	55199	FAM86C1	0.359947	0.478311	-0.116056
A_23_P123539	5520	PPP2R2A	0.230227	0.343697	-0.152931
A_23_P123544	54108	CHRAC1	0.0183207	0.0585148	-0.402567
A_23_P123555	50626	CYHR1	0.00684387	0.0327649	-0.995468
A_23_P123563	6194	RPS6	0.69012	0.773149	-0.16307
A_23_P12357	23418	CRB1	0.0664395	0.14038	-0.272343
A_23_P123578	84726	PRRC2B	0.0156681	0.0530683	-0.436363
A_23_P123582	64768	IPPK	0.00573228	0.0297649	1.06486
A_23_P123596	2731	GLDC	0.357041	0.475281	-0.223553
A_23_P123608	3717	JAK2	0.00601118	0.030578	0.394243
A_23_P123622	4882	NPR2	0.0119673	0.0449198	-0.375338
A_23_P12363	4919	ROR1	0.162487	0.266245	0.170235
A_23_P123645	7357	UGCG	8.63e-05	0.00873933	-0.68046
A_23_P123666	55357	TBC1D2	0.00768934	0.0348357	-0.620133
A_23_P123672	23424	TDRD7	0.00176902	0.0177595	0.509769
A_23_P123692	11094	C9orf7	0.0267293	0.0745918	-0.613772
A_23_P123704	58483	C9orf27	0.308906	0.426479	-0.231889
A_23_P123714	3933	LCN1	0.666736	0.754393	0.0620084
A_23_P123727	79670	ZCCHC6	0.00058859	0.013772	0.561756
A_23_P12373	NA		0.0654471	0.138738	0.242986
A_23_P123732	414328	C9orf103	0.408983	0.526993	0.151152
A_23_P123763	79886	C9orf82	0.0152519	0.0520933	0.486567
A_23_P123794	1056	CEL	0.23038	0.343851	-0.324978
A_23_P123830	NA		0.691431	0.774068	-0.0868632
A_23_P123838	NA		0.0616204	0.133096	-0.628484
A_23_P123848	153090	DAB2IP	0.0314119	0.0833422	-0.391159
A_23_P123853	6363	CCL19	0.783347	0.846237	-0.0585424
A_23_P12386	NA		0.811478	0.866935	-0.0289566
A_23_P123866	51271	UBAP1	0.0487139	0.112808	-0.234679
A_23_P123874	55234	SMU1	0.0236991	0.0690988	-0.2193
A_23_P123882	NA		0.0517526	0.117705	-0.280496
A_23_P123905	51010	EXOSC3	0.0139134	0.0490331	0.396859
A_23_P123916	90678	LRSAM1	0.0237599	0.0691971	-0.729405
A_23_P12392	5788	PTPRC	0.0209939	0.0638869	-0.46558
A_23_P123943	7046	TGFBR1	0.0410237	0.100135	0.59317
A_23_P123974	1841	DTYMK	0.454665	0.570645	-0.0433256
A_23_P123987	202052	DNAJC18	0.00337727	0.0229955	0.437136
A_23_P124003	22953	P2RX2	0.329897	0.448066	0.359574
A_23_P124022	84246	MED10	0.00743276	0.034182	-0.111496
A_23_P124024	84246	MED10	0.100742	0.188268	-0.21008
A_23_P124035	64928	MRPL14	0.00306253	0.0219744	-0.541827
A_23_P124044	10522	DEAF1	0.0118042	0.0445563	-0.629873
A_23_P12405	83715	ESPN	0.38589	0.504689	-0.24232
A_23_P124078	NA		0.441797	0.558704	-0.11624
A_23_P124084	4016	LOXL1	0.571909	0.673801	0.0482564
A_23_P124095	51806	CALML5	0.909891	0.938173	-0.0179279
A_23_P124108	3684	ITGAM	0.654193	0.744041	0.1549
A_23_P124122	5827	PXMP2	0.0509064	0.116374	0.161115
A_23_P124132	79701	C17orf101	0.179901	0.286578	-0.235318
A_23_P124164	57461	ISY1	0.00501636	0.02799	-0.438285
A_23_P124177	NA		0.108532	0.198927	-0.336476
A_23_P124190	53840	TRIM34	0.305659	0.42315	-0.109857
A_23_P124202	84289	ING5	0.713933	0.792378	0.0628519
A_23_P124224	1659	DHX8	0.0187616	0.0593997	-0.425659
A_23_P12423	23400	ATP13A2	0.0143965	0.0501805	-0.959557
A_23_P124232	117154	DACH2	0.250418	0.366095	0.237547
A_23_P124252	57118	CAMK1D	0.0468375	0.109673	-0.520782
A_23_P124300	53630	BCMO1	0.428018	0.545648	-0.108035
A_23_P124313	51319	RSRC1	0.000329362	0.0126747	-0.823276
A_23_P124327	64324	NSD1	0.058822	0.128823	-0.474699
A_23_P124335	440712	C1orf186	0.190342	0.298983	0.158901
A_23_P124343	NA		0.129625	0.225846	0.257736
A_23_P12435	4660	PPP1R12B	0.898255	0.930199	-0.0393841
A_23_P124356	NA		0.0178331	0.0574855	-0.419199
A_23_P124358	NA		0.0348304	0.0892696	-0.607545
A_23_P124377	NA		0.321867	0.43965	0.1104
A_23_P124384	6474	SHOX2	0.0461441	0.108562	-0.480889
A_23_P124402	170572	HTR3C	0.0889492	0.172301	0.186897
A_23_P124417	699	BUB1	0.000380168	0.0130763	0.552446
A_23_P124427	4750	NEK1	0.00265294	0.0206783	0.709968
A_23_P124438	255403	ZNF718	0.0579714	0.127512	0.427282
A_23_P124456	5144	PDE4D	0.000499274	0.013472	0.619448
A_23_P124476	1182	CLCN3	0.00258106	0.0204279	0.544515
A_23_P124486	5780	PTPN9	0.828	0.879953	0.0327946
A_23_P124514	1740	DLG2	0.98114	0.987374	-0.00197168
A_23_P124522	79877	DCAKD	0.0129907	0.0471208	-0.479616
A_23_P124534	59350	RXFP1	0.360264	0.478593	0.0860214
A_23_P124542	1380	CR2	0.184943	0.292473	0.211767
A_23_P124559	83463	MXD3	0.0153989	0.0524511	-0.503225
A_23_P124570	2241	FER	0.0781696	0.157391	-0.179136
A_23_P124585	81931	ZNF93	0.946738	0.963824	0.0105528
A_23_P124619	57402	S100A14	0.130453	0.226943	-0.205811
A_23_P12463	5768	QSOX1	0.0108595	0.0424748	-0.742162
A_23_P124632	3493	IGHA1	0.822638	0.875556	0.0458391
A_23_P124642	10125	RASGRP1	0.000594568	0.013772	0.990065
A_23_P124661	11273	ATXN2L	0.000239024	0.0118007	0.839326
A_23_P124699	NA		0.673919	0.760342	-0.0651955
A_23_P124733	27235	COQ2	0.137769	0.236074	-0.174489
A_23_P124742	1119	CHKA	0.325845	0.443753	-0.0831342
A_23_P124760	9862	MED24	0.764661	0.832046	-0.0872815
A_23_P12477	22955	SCMH1	0.0137748	0.0487289	-0.351707
A_23_P1248	54838	C10orf26	0.0407436	0.0996532	-0.2622
A_23_P124805	54832	VPS13C	0.0766507	0.155209	-0.262358
A_23_P124823	NA		0.260481	0.376869	0.148473
A_23_P124837	4035	LRP1	0.551011	0.65587	-0.129374
A_23_P124855	84186	ZCCHC7	0.000781647	0.0142192	0.673226
A_23_P124892	3814	KISS1	0.528043	0.635897	-0.185041
A_23_P124905	4884	NPTX1	0.0546811	0.122316	0.437586
A_23_P124912	9520	NPEPPS	0.132924	0.229924	0.191989
A_23_P124927	10636	RGS14	0.0327191	0.0856301	-0.353396
A_23_P124934	10320	IKZF1	0.101286	0.188897	0.831065
A_23_P124946	202333	CMYA5	0.0306608	0.0820074	0.371048
A_23_P124962	23625	FAM89B	0.736088	0.809909	-0.0438523
A_23_P124977	NA		0.42651	0.544103	0.127166
A_23_P124988	23415	KCNH4	0.668055	0.755406	0.131252
A_23_P125001	5881	RAC3	0.000491639	0.013472	-0.912931
A_23_P125016	NA		0.899444	0.930843	-0.0156883
A_23_P12503	55746	NUP133	0.0014984	0.0167252	0.709986
A_23_P125033	9196	KCNAB3	0.0650946	0.138212	-0.453488
A_23_P125042	7673	ZNF222	0.00323573	0.0225414	0.446756
A_23_P125056	575	BAI1	0.033218	0.0864392	-0.426052
A_23_P125067	2554	GABRA1	0.0816277	0.162373	-0.290275
A_23_P125078	284129	SLC26A11	0.119995	0.213347	0.160387
A_23_P125082	3660	IRF2	0.0499393	0.114842	0.689548
A_23_P125107	3106	HLA-B	0.181007	0.287977	-0.285938
A_23_P125109	NA		0.0814605	0.162091	-0.434464
A_23_P125117	200942	KLHDC8B	0.0168544	0.055449	-0.612414
A_23_P12514	389	RHOC	0.0332006	0.0864041	-0.445222
A_23_P125147	9364	RAB28	0.202862	0.312965	0.177433
A_23_P125157	84901	NFATC2IP	0.0577318	0.127128	-0.269507
A_23_P125164	2272	FHIT	0.115325	0.207499	-0.293068
A_23_P125171	2272	FHIT	0.347658	0.465629	0.140849
A_23_P125176	NA		0.899518	0.930874	0.0218784
A_23_P125204	219869	OR10G8	0.00944882	0.039061	-0.31936
A_23_P125233	1264	CNN1	0.504986	0.615642	0.104007
A_23_P125253	9079	LDB2	0.164677	0.268962	-0.419789
A_23_P12526	7159	TP53BP2	0.123028	0.217364	0.126102
A_23_P125265	3838	KPNA2	0.686807	0.770502	-0.0348356
A_23_P125278	6373	CXCL11	0.296841	0.414187	0.224609
A_23_P125286	23538	OR52A1	0.0566195	0.125366	-0.159014
A_23_P125303	3547	IGSF1	0.626455	0.720386	-0.0937568
A_23_P12533	91074	ANKRD30A	0.166236	0.27084	0.338052
A_23_P125348	58485	TRAPPC1	0.0269021	0.0749057	-0.739077
A_23_P125383	23671	TMEFF2	0.0072978	0.0337937	0.558974
A_23_P1254	9446	GSTO1	0.00466308	0.0269488	-0.349559
A_23_P125408	83475	DOHH	0.00600133	0.0305393	-1.23136
A_23_P125420	521	ATP5I	0.0503877	0.115549	0.200644
A_23_P125423	715	C1R	0.0451975	0.10693	0.54842
A_23_P125435	2560	GABRB1	0.779814	0.843663	0.0769712
A_23_P125451	5788	PTPRC	0.416621	0.533996	0.0928231
A_23_P125475	55879	GABRQ	0.0617256	0.133204	0.447787
A_23_P12549	54518	APBB1IP	0.379887	0.498587	0.136168
A_23_P125495	1038	CDR1	0.000372822	0.0130343	-0.481106
A_23_P125505	5475	PPEF1	0.00524941	0.0284943	0.40412
A_23_P125519	6191	RPS4X	0.227129	0.340386	-0.341826
A_23_P125533	89801	PPP1R3F	0.73314	0.80764	0.0618809
A_23_P12554	9033	PKD2L1	0.28077	0.398079	-0.132704
A_23_P125541	89801	PPP1R3F	0.00390525	0.0246939	-0.363944
A_23_P125553	474343	SPIN2B	0.367664	0.485872	0.107072
A_23_P125579	58526	MID1IP1	0.0806853	0.160978	0.2137
[truncated: 39,001 more rows]

## Sheet: Glafenine
ProbeID	EntrezGeneID	GeneSymbol	pvalue	FDR	Fold Change (log2 signed ratio)
A_23_P100001	400451	FAM174B	0.485158	0.66114	0.063418
A_23_P100011	10239	AP3S2	0.0106957	0.0967884	-0.572686
A_23_P100022	9899	SV2B	0.933689	0.968167	-0.0206098
A_23_P100056	348093	RBPMS2	0.521059	0.689495	0.127275
A_23_P100074	57099	AVEN	0.257905	0.449617	0.0801153
A_23_P100092	146050	ZSCAN29	0.9379	0.970323	0.00740481
A_23_P100103	23339	VPS39	0.00119644	0.0313645	-0.321874
A_23_P100111	11261	CHP	0.0309623	0.153799	-0.191578
A_23_P100127	57082	CASC5	0.0285208	0.149139	0.384561
A_23_P100133	23300	ATMIN	0.00308966	0.0522501	-0.264397
A_23_P100141	64718	UNKL	0.578855	0.734815	0.0636154
A_23_P100156	55654	TMEM127	0.0997095	0.264954	-0.166969
A_23_P100177	4324	MMP15	0.368129	0.559487	0.266907
A_23_P100189	5619	PRM1	0.749779	0.855638	0.0470258
A_23_P100196	9100	USP10	0.0497247	0.189524	0.390402
A_23_P100203	3281	HSBP1	0.192827	0.378414	0.190638
A_23_P100220	80004	ESRP2	0.250939	0.442135	0.225059
A_23_P100240	1014	CDH16	0.0765867	0.232335	0.228008
A_23_P10025	4753	NELL2	0.0399138	0.172254	0.303229
A_23_P100263	80790	CMIP	0.0769075	0.232795	0.451698
A_23_P100278	2903	GRIN2A	0.60222	0.752673	0.0754576
A_23_P100292	90850	ZNF598	0.045861	0.183117	0.308275
A_23_P100315	26063	DECR2	0.563399	0.723387	0.124675
A_23_P100326	8131	NPRL3	0.139124	0.315213	0.13164
A_23_P100341	23594	ORC6	0.297109	0.490234	-0.0988742
A_23_P100344	23594	ORC6	6.14e-05	0.00468156	-0.492361
A_23_P100355	5531	PPP4C	0.430345	0.613902	0.14105
A_23_P100386	146433	IL34	0.246332	0.437079	0.162426
A_23_P100392	6923	TCEB2	0.0437819	0.179273	0.24626
A_23_P100408	4917	NTN3	0.113362	0.283423	0.248072
A_23_P100413	118460	EXOSC6	0.00898296	0.0899952	-0.631996
A_23_P100420	23174	ZCCHC14	0.0201985	0.12774	0.488264
A_23_P100441	80011	FAM192A	0.0330432	0.158527	0.288476
A_23_P100455	64779	MTHFSD	0.0647361	0.213597	0.371849
A_23_P100469	54957	TXNL4B	0.0268045	0.145304	-0.418058
A_23_P100478	84148	KAT8	0.101769	0.267881	-0.17584
A_23_P100486	79001	VKORC1	0.565171	0.724553	-0.0555575
A_23_P100499	79641	ROGDI	0.148127	0.32649	-0.219621
A_23_P100501	3163	HMOX2	0.577622	0.733886	-0.0699153
A_23_P100517	124491	TMEM170A	0.014226	0.109766	-0.383073
A_23_P100522	NA		0.126602	0.299645	-0.278294
A_23_P100539	368	ABCC6	0.0840601	0.243106	0.176464
A_23_P100556	23265	EXOC7	0.264073	0.456161	0.105682
A_23_P100576	5691	PSMB3	0.685383	0.811339	-0.041386
A_23_P100583	4025	LPO	0.908421	0.953357	-0.0254364
A_23_P100595	NA		0.0496554	0.189335	0.543845
A_23_P10060	NA		0.213453	0.401265	-0.12732
A_23_P100602	6904	TBCD	0.839956	0.913189	-0.0181409
A_23_P10062	25834	MGAT4C	0.228968	0.417751	-0.200558
A_23_P100632	51155	HN1	0.745238	0.852355	0.048724
A_23_P100642	5409	PNMT	0.0405519	0.173489	0.460675
A_23_P100654	57659	ZBTB4	0.0241187	0.138352	0.218638
A_23_P100660	5176	SERPINF1	0.634222	0.776	-0.103008
A_23_P100676	23293	SMG6	0.445291	0.627364	0.218252
A_23_P100693	9931	HELZ	0.0374406	0.1672	0.370915
A_23_P100704	5598	MAPK7	0.0991645	0.264112	0.485478
A_23_P100711	5376	PMP22	0.269023	0.461331	0.0798805
A_23_P100730	8631	SKAP1	0.734776	0.845352	-0.0628765
A_23_P100754	64750	SMURF2	0.088187	0.248824	-0.375474
A_23_P100764	51629	SLC25A39	0.388798	0.57752	0.0957302
A_23_P10077	57104	PNPLA2	0.125382	0.298301	0.550513
A_23_P100779	7343	UBTF	0.911062	0.955065	-0.0105834
A_23_P100788	6777	STAT5B	0.122828	0.294906	-0.164663
A_23_P100795	6774	STAT3	0.61882	0.765197	0.0509792
A_23_P100802	28958	CCDC56	0.0627244	0.210467	0.131354
A_23_P10081	200894	ARL13B	0.209187	0.396831	-0.206287
A_23_P100868	80179	MYO19	0.913224	0.956427	0.0124981
A_23_P100872	3213	HOXB3	0.262288	0.454237	0.20959
A_23_P100883	23512	SUZ12	0.114623	0.284954	0.244104
A_23_P10091	NA		0.0330519	0.158532	-0.725136
A_23_P100912	28964	GIT1	0.308254	0.501265	0.316728
A_23_P100931	23746	AIPL1	0.103761	0.270175	-0.154751
A_23_P100935	23746	AIPL1	0.607638	0.756618	-0.0867066
A_23_P100959	124961	ZFP3	0.477624	0.655002	-0.0901604
A_23_P100963	201305	SPNS3	0.836739	0.911069	0.0400663
A_23_P100990	8687	KRT38	0.0448311	0.181091	0.275903
A_23_P100991	8687	KRT38	0.00895527	0.0899952	0.353426
A_23_P101007	147111	NOTUM	0.354447	0.546728	-0.0949326
A_23_P101013	11322	TMC6	0.236978	0.426687	0.162223
A_23_P101025	654346	LGALS9C	0.143961	0.321027	0.424121
A_23_P101038	83900	KRTAP9-3	0.156917	0.337084	-0.346252
A_23_P101048	83897	KRTAP3-2	0.162031	0.342738	-0.315266
A_23_P101054	3885	KRT34	0.0629253	0.210624	-0.643999
A_23_P101073	8387	OR1E1	0.594622	0.746806	0.195182
A_23_P101084	84690	SPATA22	0.0721313	0.225316	0.336593
A_23_P101093	51226	COPZ2	0.0653231	0.214556	-0.327009
A_23_P101111	9150	CTDP1	0.110921	0.279949	0.296656
A_23_P101121	NA		0.0460601	0.183472	0.375444
A_23_P101131	2922	GRP	0.36833	0.559648	-0.146221
A_23_P101141	54941	RNF125	0.16091	0.341529	-0.20409
A_23_P101185	4677	NARS	0.9281	0.964918	0.00831694
A_23_P101193	4645	MYO5B	0.767345	0.867869	-0.0264413
A_23_P101208	1528	CYB5A	0.0387259	0.169674	-0.344722
A_23_P10121	6422	SFRP1	0.590599	0.743599	0.0853236
A_23_P101237	83608	C18orf21	0.126059	0.29903	-0.295666
A_23_P101240	147645	VSIG10L	0.93225	0.967432	-0.025097
A_23_P101246	147645	VSIG10L	0.0772104	0.23323	0.381003
A_23_P101253	80110	ZNF614	0.233751	0.42322	0.165851
A_23_P101258	80110	ZNF614	0.812553	0.896037	0.0312389
A_23_P10127	6422	SFRP1	0.00501218	0.0672886	0.505557
A_23_P101272	55663	ZNF446	0.162473	0.343247	0.240249
A_23_P101281	84914	ZNF587	0.163819	0.344802	0.212514
A_23_P101297	24139	EML2	0.220562	0.409111	0.0690643
A_23_P101303	284352	LRRC68	0.585423	0.73958	0.225988
A_23_P101308	284352	LRRC68	0.674723	0.803807	0.123033
A_23_P101319	26974	ZNF285	0.0464756	0.184072	0.363432
A_23_P101321	9138	ARHGEF1	0.125088	0.298126	0.394046
A_23_P101332	65095	KRI1	0.0962654	0.259935	0.160123
A_23_P101342	84971	ATG4D	0.235415	0.425012	0.162853
A_23_P10135	28511	NKIRAS2	0.945647	0.974331	-0.011112
A_23_P101351	79088	ZNF426	0.00817613	0.0861686	-0.557001
A_23_P101374	29785	CYP2S1	0.245607	0.436191	0.40123
A_23_P101380	374907	B3GNT8	0.0665643	0.216628	0.332925
A_23_P101392	79041	TMEM38A	0.50494	0.676557	0.0685202
A_23_P1014	84791	C1orf97	0.0567357	0.200755	-0.253145
A_23_P101407	718	C3	0.0551842	0.197967	0.558887
A_23_P101427	115704	EVI5L	0.162792	0.34363	0.31759
A_23_P101434	91662	NLRP12	0.017402	0.119528	-0.707761
A_23_P101461	81576	CCDC130	0.629951	0.773016	-0.0609632
A_23_P101476	79973	ZNF442	0.280501	0.47344	-0.146108
A_23_P101480	22983	MAST1	0.0422855	0.176769	0.394187
A_23_P101505	11012	KLK11	0.936095	0.96941	0.013858
A_23_P101516	3748	KCNC3	0.944192	0.973531	-0.010791
A_23_P101521	126123	IZUMO2	0.0891435	0.250215	0.382929
A_23_P101532	6205	RPS11	0.730744	0.84254	0.200817
A_23_P101551	587	BCAT2	0.0946637	0.257594	0.245117
A_23_P10156	79643	CHMP6	0.671162	0.801516	0.106381
A_23_P101564	26291	FGF21	0.578454	0.734488	-0.129413
A_23_P101573	171169	SPACA4	0.000249739	0.0117868	0.422554
A_23_P101615	147929	ZNF565	0.0264196	0.144263	0.333932
A_23_P101623	63934	ZNF667	0.625872	0.770246	-0.138741
A_23_P101636	3812	KIR3DL2	0.725279	0.838971	-0.0919618
A_23_P101642	5794	PTPRH	0.450727	0.631898	0.101742
A_23_P101655	81	ACTN4	0.320583	0.513337	0.347901
A_23_P101671	85300	ATCAY	0.339232	0.531996	0.0990223
A_23_P101683	1178	CLC	0.40201	0.589226	-0.140425
A_23_P101699	84717	HDGFRP2	0.318169	0.511125	-0.105654
A_23_P101707	10226	PLIN3	0.240905	0.431201	-0.113803
A_23_P10172	29122	PRSS50	0.0132867	0.106815	0.171369
A_23_P101737	84444	DOT1L	0.24619	0.436903	0.234259
A_23_P101742	116541	MRPL54	0.385065	0.574599	0.0747922
A_23_P101759	2527	FUT5	0.0544577	0.196876	-0.207532
A_23_P101761	84634	KISS1R	0.0189558	0.124271	0.270007
A_23_P101774	6528	SLC5A5	0.265069	0.457096	0.0666625
A_23_P101783	3594	IL12RB1	0.115194	0.285731	0.334436
A_23_P101796	85360	SYDE1	0.968394	0.986856	0.00334329
A_23_P101806	3249	HPN	0.679069	0.806882	0.113523
A_23_P101811	7561	ZNF14	0.115422	0.285936	0.170138
A_23_P10182	8309	ACOX2	0.91569	0.958055	-0.0192003
A_23_P101829	9170	LPAR2	0.789246	0.882324	-0.0465984
A_23_P101871	115290	FBXO17	0.100213	0.265612	-0.248653
A_23_P101893	84467	FBN3	0.0900046	0.251204	0.19753
A_23_P101905	10297	APC2	0.0560874	0.199492	0.142322
A_23_P101908	10297	APC2	0.000294616	0.0131582	0.313983
A_23_P10194	26470	SEZ6L2	0.101718	0.267783	0.31627
A_23_P101943	26225	ARL5A	0.720399	0.835376	0.0335062
A_23_P101950	4190	MDH1	0.0761922	0.23169	0.257719
A_23_P101960	678	ZFP36L2	0.0260094	0.143364	-0.892189
A_23_P101972	92291	CAPN13	0.0430958	0.178136	0.417315
A_23_P101992	8685	MARCO	0.880704	0.937163	-0.0183878
A_23_P102000	7852	CXCR4	0.803673	0.890573	0.0395398
A_23_P102017	57471	ERMN	0.00436307	0.062657	-0.77137
A_23_P102037	80219	COQ10B	4.77e-05	0.00390657	-0.816696
A_23_P102058	4148	MATN3	0.209311	0.396918	-0.205122
A_23_P10206	3037	HAS2	0.175374	0.358192	-0.131485
A_23_P102060	6744	SSFA2	0.372227	0.563035	0.20051
A_23_P102071	NA		0.0775412	0.233752	-0.263022
A_23_P102083	66037	BOLL	0.0352021	0.162752	-0.281298
A_23_P102109	7277	TUBA4A	0.632077	0.774557	-0.0899898
A_23_P10211	114134	SLC2A13	6.55e-05	0.00489004	0.282803
A_23_P102113	80326	WNT10A	0.997603	1	-0.000898836
A_23_P102117	80326	WNT10A	0.734025	0.844701	0.0640982
A_23_P102122	10109	ARPC2	0.265056	0.457096	0.143877
A_23_P102160	151393	FAM82A1	0.02228	0.133883	0.194834
A_23_P102172	130749	CPO	0.00277938	0.0495227	0.459943
A_23_P102183	NA		0.00045284	0.0172711	-0.680428
A_23_P102192	9448	MAP4K4	0.00188783	0.0406498	-0.655093
A_23_P102202	2956	MSH6	0.0508321	0.191238	0.327661
A_23_P102235	6637	SNRPG	0.0176295	0.12021	-0.294574
A_23_P102242	64844	2007-03-01	0.0155694	0.113828	-0.342366
A_23_P102258	116540	MRPL53	0.135571	0.311082	0.0759607
A_23_P102262	9801	MRPL19	0.502267	0.674654	-0.125655
A_23_P102278	57628	DPP10	0.384899	0.57448	-0.0751176
A_23_P102286	3973	LHCGR	0.7398	0.848669	-0.0951029
A_23_P10232	55024	BANK1	0.0259399	0.143083	1.38155
A_23_P102320	129401	NUP35	0.182563	0.366628	0.0967714
A_23_P102331	6332	SCN7A	0.639146	0.779492	0.0502767
A_23_P102351	9486	CHST10	0.113566	0.283629	-0.17463
A_23_P102364	25791	NGEF	0.0539478	0.196122	0.186456
A_23_P102391	30061	SLC40A1	0.0808255	0.238132	0.631416
A_23_P102404	10574	CCT7	0.142276	0.318937	0.182382
A_23_P102412	65977	PLEKHA3	0.163527	0.344408	0.115375
A_23_P102420	10575	CCT4	0.913441	0.956508	0.0266748
A_23_P102439	431705	ASTL	0.720192	0.835318	-0.0137322
A_23_P102454	51141	INSIG2	0.0183881	0.122771	-0.51196
A_23_P102462	129804	FBLN7	0.952936	0.978251	0.00435815
A_23_P102471	4436	MSH2	0.477709	0.655097	0.121729
A_23_P102481	1493	CTLA4	0.168751	0.350424	-0.199158
A_23_P102494	54978	C2orf18	0.389508	0.578186	0.158491
A_23_P102508	8884	SLC5A6	0.0216094	0.131942	-0.402444
A_23_P102517	5147	PDE6D	0.140091	0.316198	-0.107551
A_23_P102523	6711	SPTBN1	0.2462	0.436903	-0.142401
A_23_P102542	54812	AFTPH	0.192666	0.378284	0.185777
A_23_P102551	7851	MALL	0.000871158	0.025549	-1.4139
A_23_P102571	56731	SLC2A4RG	0.161932	0.342615	0.285179
A_23_P102575	56731	SLC2A4RG	0.382009	0.572025	0.174408
A_23_P102582	55969	C20orf24	0.564108	0.723914	-0.0731671
A_23_P102607	84181	CHD6	0.810889	0.894876	0.0277487
A_23_P102611	8839	WISP2	0.610122	0.758583	0.108716
A_23_P102622	8785	MATN4	0.312366	0.505406	0.157063
A_23_P102634	140870	WFDC6	0.827629	0.905564	0.0783304
A_23_P102681	79160	MGC4294	0.24771	0.438784	0.14902
A_23_P102694	140881	DEFB129	0.000523656	0.018888	0.523472
A_23_P102706	9751	SNPH	0.0870941	0.247341	0.287757
A_23_P102731	54498	SMOX	0.57286	0.730344	0.190302
A_23_P102743	51605	TRMT6	0.00148171	0.0353815	-0.793744
A_23_P102759	22903	BTBD3	0.180525	0.364283	-0.0768634
A_23_P102769	92667	C20orf72	0.101392	0.267251	-0.245621
A_23_P102770	51126	NAA20	0.016737	0.11785	-0.271026
A_23_P102816	NA		0.438902	0.621911	0.0635417
A_23_P102832	11190	CEP250	0.0247437	0.140046	0.333097
A_23_P102842	9054	NFS1	0.0286536	0.149428	0.324681
A_23_P102864	5651	TMPRSS15	0.0274161	0.14658	-1.10941
A_23_P102876	10694	CCT8	0.133449	0.308457	-0.170973
A_23_P102884	8867	SYNJ1	5.16e-05	0.00410742	-0.262272
A_23_P102890	64968	MRPS6	0.797154	0.886702	0.0335207
A_23_P1029	4237	MFAP2	0.208848	0.396501	0.160596
A_23_P10291	1510	CTSE	0.414545	0.599717	0.0915354
A_23_P102917	10317	B3GALT5	0.0951014	0.258265	-0.27399
A_23_P102919	10317	B3GALT5	0.634294	0.776	-0.0965486
A_23_P102925	5822	PWP2	0.42875	0.612778	0.103905
A_23_P102937	6612	SUMO3	0.181224	0.365066	-0.14385
A_23_P102950	89765	RSPH1	0.0244033	0.139156	0.413548
A_23_P102965	23786	BCL2L13	0.704261	0.824285	-0.0322961
A_23_P102973	8220	DGCR14	0.264645	0.456784	0.235596
A_23_P102988	10587	TXNRD2	0.0646275	0.213451	-0.108715
A_23_P102994	5297	PI4KA	0.531029	0.697401	0.0504883
A_23_P103011	9609	RAB36	0.649546	0.786827	0.138597
A_23_P103034	1413	CRYBA4	0.412795	0.598232	0.15387
A_23_P103041	10634	GAS2L1	0.312743	0.505757	-0.124509
A_23_P10305	56474	CTPS2	0.0115572	0.100293	-0.261843
A_23_P103062	91445	RNF185	0.149974	0.328695	0.155792
A_23_P103070	7533	YWHAH	0.51966	0.688595	-0.12494
A_23_P103084	10043	TOM1	4.98e-05	0.004023	-0.642629
A_23_P103099	23543	RBFOX2	0.0500112	0.189765	-0.143142
A_23_P103104	4242	MFNG	0.314389	0.50751	0.107277
A_23_P103110	23764	MAFF	0.269775	0.462213	-0.246873
A_23_P103120	9567	GTPBP1	0.160325	0.340998	0.0985876
A_23_P103131	54471	SMCR7L	0.945212	0.974103	0.00545754
A_23_P103149	50	ACO2	0.00878118	0.089349	0.376027
A_23_P103172	127253	TYW3	0.747827	0.854231	-0.0308551
A_23_P103180	127253	TYW3	0.51296	0.683193	-0.0827515
A_23_P103201	55629	PNRC2	0.347839	0.540205	0.156259
A_23_P103226	2166	FAAH	0.219274	0.40761	0.241962
A_23_P103232	54935	DUSP23	0.917404	0.958817	0.00888474
A_23_P103248	93183	PIGM	0.83839	0.912182	-0.0213948
A_23_P103256	10878	CFHR3	0.61015	0.758593	-0.0646031
A_23_P103269	NA		4.06e-05	0.00345875	-1.18433
A_23_P103276	112970	KTI12	0.347833	0.540205	-0.069182
A_23_P103282	9528	TMEM59	0.0953779	0.258699	0.346077
A_23_P103310	6278	S100A7	0.00930105	0.0912071	-0.731219
A_23_P103315	353131	LCE1A	0.663282	0.796127	0.0845618
A_23_P103328	5733	PTGER3	0.0717864	0.224805	0.209489
A_23_P103334	149041	RC3H1	0.132114	0.306639	0.24451
A_23_P103349	10896	OCLM	0.0335403	0.159394	-0.301559
A_23_P103361	3932	LCK	0.547727	0.710681	0.0810309
A_23_P103371	113451	ADC	0.709628	0.828305	-0.0376316
A_23_P103398	5664	PSEN2	0.317219	0.510218	0.193176
A_23_P103405	NA		0.413469	0.598787	-0.0815538
A_23_P103414	51441	YTHDF2	0.491249	0.666331	0.110938
A_23_P103424	85397	RGS8	0.0431509	0.178166	0.237045
A_23_P103433	127700	OSCP1	0.0375903	0.167481	0.28893
A_23_P103442	64769	MEAF6	0.574745	0.731864	0.0829077
A_23_P103454	84224	NBPF3	0.377488	0.567778	0.17791
A_23_P103465	5322	PLA2G5	0.210626	0.398435	0.227891
A_23_P103476	29914	UBIAD1	0.91896	0.95964	-0.00739379
A_23_P103486	1573	CYP2J2	0.00992256	0.0936737	0.280968
A_23_P103496	115361	GBP4	0.0460303	0.183388	0.263346
A_23_P103503	4194	MDM4	0.0134478	0.107387	-0.322288
A_23_P103511	400793	C1orf226	0.0010284	0.0283554	0.269449
A_23_P103522	6402	SELL	0.42873	0.61277	0.0700977
A_23_P103532	23432	GPR161	0.505911	0.677235	0.0258753
A_23_P10356	10863	ADAM28	0.0437625	0.179241	0.788222
A_23_P103561	89796	NAV1	0.0770794	0.233062	0.289246
A_23_P103571	10905	MAN1A2	0.0838399	0.242791	0.150493
A_23_P103588	3158	HMGCS2	0.192952	0.378565	-0.236332
A_23_P103601	57134	MAN1C1	0.0104841	0.0959658	0.32245
A_23_P103617	8416	ANXA9	0.0151722	0.112733	0.538581
A_23_P103628	55127	HEATR1	0.00575521	0.0720059	0.169646
A_23_P103631	10969	EBNA1BP2	0.0388483	0.169969	-0.19053
A_23_P103661	55249	YY1AP1	0.580845	0.736111	-0.0548825
A_23_P103672	10763	NES	0.90955	0.954188	0.0170726
A_23_P103690	10712	FAM189B	0.416522	0.60155	0.135346
A_23_P103698	28956	LAMTOR2	0.052291	0.193313	0.222742
A_23_P103703	27129	HSPB7	0.938625	0.970632	-0.00666367
A_23_P103720	79814	AGMAT	0.391685	0.580223	-0.0960324
A_23_P10374	22864	R3HDM2	0.0455315	0.182423	0.285186
A_23_P103743	NA		0.35608	0.54831	0.310001
A_23_P103756	5016	OVGP1	0.00692151	0.079136	0.452487
A_23_P103765	2205	FCER1A	0.564306	0.724013	-0.387287
A_23_P103775	84230	LRRC8C	0.0622039	0.20973	-0.363642
A_23_P103787	204851	HIPK1	0.130649	0.304803	0.198503
A_23_P103795	81839	VANGL1	0.121747	0.293438	0.131131
A_23_P1038	10765	KDM5B	0.033401	0.159184	0.259739
A_23_P103803	115352	FCRL3	0.188886	0.374083	-0.158174
A_23_P103812	339479	FAM5C	0.960286	0.982121	0.0080796
A_23_P103824	5298	PI4KB	0.0204325	0.128329	0.321217
A_23_P103837	9898	UBAP2L	0.111228	0.280482	0.190102
A_23_P10385	51514	DTL	0.424549	0.608825	-0.0273395
A_23_P103864	79573	TTC13	0.0144661	0.110658	0.321501
A_23_P103877	126755	LRRC38	0.134884	0.310253	-0.348695
A_23_P103885	54998	AURKAIP1	0.37892	0.569216	0.140721
A_23_P103897	100505741	SPATA1	0.000914975	0.0264369	0.216261
A_23_P103905	51506	UFC1	0.1402	0.316375	-0.269084
A_23_P10391	1290	COL5A2	0.0511554	0.191693	0.67752
A_23_P103919	8703	B4GALT3	0.577772	0.733963	0.113606
A_23_P103923	9917	FAM20B	0.256196	0.448143	-0.0651838
A_23_P103932	2268	FGR	0.347008	0.539528	-0.091387
A_23_P103942	55735	DNAJC11	0.149662	0.328398	0.353634
A_23_P103951	NA		0.110047	0.279072	0.24671
A_23_P103968	22977	AKR7A3	0.00759062	0.0831238	0.177675
A_23_P103971	199974	CYP4Z1	0.0198147	0.1267	-0.756113
A_23_P103981	723790	HIST2H2AA4	0.23725	0.426972	0.151513
A_23_P103996	2730	GCLM	0.00367018	0.0571939	-0.989018
A_23_P10401	5523	PPP2R3A	0.537007	0.701896	-0.0524118
A_23_P104012	NA		0.8185	0.899884	0.0416178
A_23_P104022	116461	TSEN15	0.494694	0.669034	-0.111548
A_23_P104025	116461	TSEN15	0.515498	0.685192	-0.0705038
A_23_P104046	10380	BPNT1	0.0414316	0.175177	-0.34204
A_23_P104054	51430	C1orf9	0.116135	0.286773	0.154849
A_23_P104065	23463	ICMT	0.170751	0.352934	0.15741
A_23_P104073	6274	S100A3	0.424575	0.608827	-0.186891
A_23_P104086	9696	CROCC	0.0113698	0.0996073	0.217134
A_23_P104098	127833	SYT2	0.173725	0.356385	0.0823523
A_23_P104109	26750	RPS6KC1	0.124527	0.297389	0.208616
A_23_P104116	9939	RBM8A	0.348415	0.540858	-0.0896867
A_23_P104138	339500	ZNF678	0.00227927	0.0446512	0.3977
A_23_P104146	9202	ZMYM4	0.343388	0.535931	0.146508
A_23_P104151	51249	TMEM69	0.107259	0.275332	-0.225944
A_23_P104188	1999	ELF3	0.608734	0.757476	0.0299856
A_23_P104193	3688	ITGB1	0.0389196	0.170105	-0.268782
A_23_P104199	3688	ITGB1	2.27e-06	0.000436782	-0.557912
A_23_P104201	10730	YME1L1	0.0592699	0.205	-0.133423
A_23_P104224	29974	A1CF	0.876581	0.9344	0.0238994
A_23_P104237	57678	GPAM	0.00414305	0.0609929	-0.332467
A_23_P104252	80760	ITIH5	0.0573652	0.201834	0.458121
A_23_P104275	387700	SLC16A12	0.863769	0.927009	-0.0227961
A_23_P104282	55719	FAM178A	0.499163	0.672329	-0.072573
A_23_P104295	6468	FBXW4	0.0194719	0.125803	-0.310364
A_23_P1043	55765	C1orf106	0.175164	0.357887	0.157291
A_23_P104318	54541	DDIT4	0.992381	0.9999	0.00180163
A_23_P104323	4255	MGMT	0.698082	0.819955	0.043867
A_23_P104335	220965	FAM13C	0.0211221	0.130659	-0.377142
A_23_P104346	5305	PIP4K2A	0.790225	0.882817	-0.0248298
A_23_P104351	404636	FAM45A	0.100187	0.265565	-0.153892
A_23_P104362	1892	ECHS1	0.214324	0.402328	0.116423
A_23_P104372	23234	DNAJC9	0.634067	0.775953	-0.0344131
A_23_P104387	27069	GHITM	0.0986416	0.263382	-0.178065
A_23_P104413	22947	DUX4	0.245632	0.436216	0.241526
A_23_P10442	114876	OSBPL1A	0.369514	0.560828	0.105406
A_23_P104438	84665	MYPN	0.668404	0.799666	-0.0473476
A_23_P104445	118788	PIK3AP1	0.360556	0.552549	0.213865
A_23_P104451	79009	DDX50	0.0328838	0.158181	0.246272
A_23_P104464	240	ALOX5	0.0225315	0.134389	0.883674
A_23_P104471	51207	DUSP13	0.582322	0.737204	0.104879
A_23_P104484	338557	O3FAR1	0.917943	0.959169	0.0138762
A_23_P104493	9060	PAPSS2	0.114318	0.284569	-0.145944
A_23_P104509	9679	FAM53B	0.42948	0.613378	0.0615208
A_23_P104522	10529	NEBL	0.312232	0.505289	0.203371
A_23_P104555	26287	ANKRD2	0.152476	0.331557	-0.143664
A_23_P104563	1374	CPT1A	0.000603165	0.0204209	0.271608
A_23_P104579	10263	CDK2AP2	0.0214042	0.131354	0.294083
A_23_P10458	55267	C22orf26	0.773215	0.871504	-0.0449991
A_23_P104583	57175	CORO1B	0.923219	0.962126	-0.0112079
A_23_P104594	6343	SCT	0.197303	0.383529	0.213109
A_23_P104607	5702	PSMC3	0.0505509	0.190781	-0.227032
A_23_P104617	120071	GYLTL1B	0.108066	0.276343	0.354219
A_23_P104624	23052	ENDOD1	0.24565	0.436229	0.150438
A_23_P10463	4725	NDUFS5	0.496663	0.670481	0.169765
A_23_P104641	738	C11orf2	0.1566	0.336633	0.362328
A_23_P104651	113130	CDCA5	0.0297747	0.151504	0.247563
A_23_P104676	10291	SF3A1	0.10938	0.278131	0.285321
A_23_P104689	5970	RELA	0.682145	0.808977	0.0599454
A_23_P104692	246330	PELI3	0.00361883	0.0566954	0.320777
A_23_P104705	3177	SLC29A2	0.157883	0.33817	-0.208396
A_23_P104734	3703	STT3A	0.70047	0.821509	0.0680147
A_23_P104741	84623	KIRREL3	0.345009	0.537561	-0.248928
A_23_P104762	10413	YAP1	0.806039	0.892129	-0.0122618
A_23_P104798	3606	IL18	0.0265954	0.144648	-0.559458
A_23_P104804	7704	ZBTB16	0.622646	0.767843	-0.0557053
A_23_P104819	11181	TREH	0.134496	0.309724	-0.269899
A_23_P104845	1132	CHRM4	0.0736619	0.227797	0.2928
A_23_P104853	7007	TECTA	0.0175951	0.120053	0.610745
A_23_P104865	NA		0.454625	0.635189	0.0627085
A_23_P104876	53340	SPA17	0.172521	0.355012	0.23034
A_23_P10488	NA		0.00608191	0.0738183	-0.495723
A_23_P104881	54538	ROBO4	0.379673	0.569954	0.289975
A_23_P104892	1982	EIF4G2	0.0245128	0.139432	0.4143
A_23_P104942	51075	TMX2	0.381112	0.571194	-0.115331
A_23_P10497	374868	ATP9B	0.0236889	0.137356	0.289873
A_23_P104972	64232	MS4A5	0.193166	0.378747	0.283837
A_23_P104996	7439	BEST1	0.577572	0.733866	0.0756359
A_23_P10500	374868	ATP9B	0.125841	0.29869	0.290191
A_23_P105002	6094	ROM1	0.729667	0.841884	0.0417548
A_23_P105012	54979	HRASLS2	0.0415048	0.175388	0.713518
A_23_P105028	25923	ATL3	0.128655	0.302163	-0.20163
A_23_P105044	6150	MRPL23	0.908443	0.953357	0.0193392
A_23_P10506	27306	HPGDS	0.820773	0.901321	0.0408853
A_23_P105066	3611	ILK	0.0896476	0.250795	0.293201
A_23_P105088	430	ASCL2	0.817701	0.899371	0.0382486
A_23_P105118	79324	OR51G1	0.121688	0.293345	0.449592
A_23_P105138	847	CAT	0.0286063	0.149335	0.30999
A_23_P105144	57758	SCUBE2	0.244921	0.435595	-0.112266
A_23_P10518	51270	TFDP3	0.00109536	0.0295986	-0.960645
A_23_P105184	116985	ARAP1	0.0357578	0.163825	0.448248
A_23_P105197	726	CAPN5	0.530042	0.696842	0.052581
A_23_P105212	7069	THRSP	0.902841	0.950067	0.0142105
A_23_P105227	10873	ME3	0.0429794	0.177956	-0.304922
A_23_P10525	NA		0.212627	0.400263	0.535831
A_23_P105251	2735	GLI1	0.184541	0.369002	0.298016
A_23_P105264	2120	ETV6	0.152274	0.331351	0.331722
A_23_P105276	7637	ZNF84	0.0652058	0.214441	0.315025
A_23_P105307	1606	DGKA	0.0331585	0.15869	0.400717
A_23_P105313	1967	EIF2B1	0.772288	0.870859	0.0510662
A_23_P105368	NA		0.572656	0.730247	0.0654907
A_23_P105382	83591	THAP2	0.0642526	0.212696	0.253612
A_23_P105392	10576	CCT2	0.172208	0.354605	0.125828
A_23_P105409	7786	MAP3K12	0.0137054	0.108228	0.270344
A_23_P10542	94031	HTRA3	0.249029	0.440086	-0.167604
A_23_P105423	9840	KIAA0748	0.168747	0.350424	0.108343
A_23_P105436	5781	PTPN11	0.104297	0.270862	-0.248094
A_23_P105442	160622	GRASP	0.438111	0.621142	0.0710458
A_23_P105453	319101	KRT73	0.73931	0.848402	-0.102742
A_23_P105461	1240	CMKLR1	0.252721	0.443981	0.191423
A_23_P105465	1240	CMKLR1	0.100593	0.266084	0.18411
A_23_P105475	28234	SLCO1B3	0.322934	0.515448	-0.182157
A_23_P105495	50840	TAS2R14	0.105571	0.272869	-0.194297
A_23_P105519	51729	WBP11	0.347543	0.53997	0.235949
A_23_P105524	89869	PLCZ1	0.197638	0.383903	-0.22257
A_23_P105535	282809	POC1B	0.486878	0.662524	-0.0668795
A_23_P105545	6843	VAMP1	0.662851	0.795887	-0.0448017
A_23_P105562	7450	VWF	0.0254698	0.141759	0.412663
A_23_P105571	56994	CHPT1	0.000213654	0.0107615	-0.415069
A_23_P105583	83695	C12orf32	0.00129462	0.0327248	-0.519448
A_23_P10559	9625	AATK	0.0880399	0.248607	0.114265
A_23_P105592	4598	MVK	0.263492	0.455536	-0.202857
A_23_P1056	51463	GPR89B	0.705134	0.824906	0.0376549
A_23_P10561	NA		0.796423	0.886188	-0.0437265
A_23_P105619	89894	TMEM116	0.137474	0.313256	0.290496
A_23_P105625	84274	COQ5	0.499351	0.672465	0.050513
A_23_P10564	NA		0.904463	0.951017	-0.0295632
A_23_P105646	466	ATF1	0.000387116	0.0155606	-0.549999
A_23_P105651	29951	PDZRN4	0.9685	0.986915	-0.00504308
A_23_P105664	29080	CCDC59	0.0227664	0.134985	-0.36925
A_23_P105691	55507	GPRC5D	0.096891	0.260836	0.624419
A_23_P105705	2251	FGF6	0.423866	0.608236	0.184342
A_23_P105730	56890	MDM1	0.00060001	0.0203814	-0.620214
A_23_P105732	NA		0.334493	0.527239	-0.0547254
A_23_P105747	55198	APPL2	0.675159	0.803924	-0.0318242
A_23_P105753	11137	PWP1	0.823168	0.902763	0.0131903
A_23_P105794	94240	EPSTI1	0.925148	0.963224	0.0131493
A_23_P105803	2254	FGF9	0.456212	0.636518	-0.163884
A_23_P105815	NA		0.00262816	0.0481476	-0.999761
A_23_P105833	54841	BIVM	0.67513	0.803924	0.0322601
A_23_P105856	283537	SLC46A3	0.849612	0.918693	0.0417082
A_23_P105862	10129	FRY	0.0406128	0.173586	0.454859
A_23_P105873	7223	TRPC4	0.967318	0.986126	-0.00539008
A_23_P105886	387911	C1QTNF9B	0.118402	0.289399	0.623354
A_23_P105900	690	BTF3P11	0.000229663	0.0113312	-0.538543
A_23_P10591	284207	METRNL	0.194822	0.380636	0.216632
A_23_P105923	1735	DIO3	0.164966	0.346301	0.17266
A_23_P105939	91828	EXOC3L4	0.473011	0.65129	0.090114
A_23_P105957	87	ACTN1	0.965587	0.985317	-0.0077652
A_23_P105963	122481	AK7	0.142634	0.319353	0.247686
A_23_P105973	256394	SERPINA11	0.507712	0.678715	0.108154
A_23_P106	23032	USP33	0.366057	0.557579	-0.140325
A_23_P106002	4792	NFKBIA	0.220752	0.4093	-0.158628
A_23_P106016	5587	PRKD1	0.698693	0.820377	0.0537378
A_23_P106024	3714	JAG2	0.538478	0.703053	0.0944103
A_23_P106042	116173	CMTM5	0.566332	0.725523	0.119416
A_23_P10605	NA		0.00939361	0.0916166	-0.659129
A_23_P106056	1603	DAD1	0.219665	0.40806	0.14325
A_23_P106069	NA		0.13296	0.307777	-0.378818
A_23_P106080	84659	RNASE7	0.0107225	0.0969187	-0.690658
A_23_P106103	9495	AKAP5	0.13446	0.309659	-0.166262
A_23_P106117	4990	SIX6	0.61359	0.761232	0.0838171
A_23_P106127	9786	KIAA0586	0.0268522	0.145358	0.209934
A_23_P106131	3895	KTN1	0.150931	0.329702	0.26929
A_23_P10614	5163	PDK1	0.0316496	0.155666	-0.412399
A_23_P106145	30001	ERO1L	0.327698	0.520389	-0.142851
A_23_P106158	79944	L2HGDH	0.014756	0.111602	-0.386124
A_23_P106162	55320	MIS18BP1	0.00584887	0.0724264	0.326088
A_23_P106174	5663	PSEN1	0.000224757	0.0111347	-0.772164
A_23_P106194	2353	FOS	0.1465	0.324379	-0.252515
A_23_P106204	2954	GSTZ1	0.579545	0.735394	-0.0674902
A_23_P106226	29082	CHMP4A	0.250478	0.441719	0.128239
A_23_P106236	29018	PRO1768	0.209263	0.396901	0.947963
A_23_P106241	9321	TRIP11	0.0628582	0.21057	0.159577
A_23_P106258	283600	SLC25A47	0.796003	0.885985	-0.0420069
A_23_P106280	55056	FLJ10038	3.01e-05	0.00281944	0.323671
A_23_P106299	10169	SERF2	0.031807	0.156015	0.26316
A_23_P106322	64506	CPEB1	0.0171467	0.119016	-0.500163
A_23_P106362	366	AQP9	0.103483	0.269851	-0.338355
A_23_P106371	342096	GOLGA6A	0.229637	0.418524	-0.234824
A_23_P106389	8482	SEMA7A	0.170714	0.352934	-0.28906
A_23_P106391	56906	THAP10	0.984668	0.99584	-0.00155177
A_23_P10640	339221	ENPP7	0.0785108	0.235103	0.122522
A_23_P106405	4692	NDN	0.218144	0.406412	0.166441
A_23_P106412	NA		0.0213513	0.131265	0.315317
A_23_P106425	348110	C15orf38	0.698934	0.820533	-0.0322807
A_23_P106433	91433	RCCD1	0.0134199	0.107352	0.316206
A_23_P106439	91433	RCCD1	0.0241546	0.138443	0.230253
A_23_P106463	4947	OAZ2	0.19945	0.38587	-0.0948096
A_23_P10647	54360	CYTL1	0.774295	0.872146	0.0559071
A_23_P106472	NA		0.41261	0.598091	0.230266
A_23_P106481	51234	TMEM85	0.00284804	0.0500795	-0.627632
A_23_P106497	3658	IREB2	0.301739	0.495128	-0.0700732
A_23_P106505	9836	LCMT2	0.123053	0.295281	0.114592
A_23_P106522	54617	INO80	0.00597061	0.0731168	0.248712
A_23_P106532	113189	CHST14	0.750808	0.856243	0.0678735
A_23_P106544	56942	C16orf61	0.357661	0.549735	-0.103682
A_23_P106559	64718	UNKL	0.528876	0.695934	0.054026
A_23_P106562	2588	GALNS	0.778007	0.875125	0.0389804
A_23_P106575	2806	GOT2	0.541163	0.704997	0.0976407
A_23_P106602	83716	CRISPLD2	0.0767049	0.232491	-0.529733
A_23_P106617	58189	WFDC1	0.741976	0.850074	0.0755777
A_23_P106629	10261	IGSF6	0.000944494	0.0268646	-0.451809
A_23_P106633	55794	DDX28	0.268299	0.460459	0.129102
A_23_P106656	766	CA7	0.515433	0.685138	-0.0913332
A_23_P106661	113540	CMTM1	0.143191	0.320072	0.217664
A_23_P106663	100529251	CKLF-CMTM1	0.252548	0.443807	0.218721
A_23_P106675	5336	PLCG2	0.0376084	0.167493	0.505201
A_23_P106682	2013	EMP2	0.301895	0.495227	0.132487
A_23_P106694	5119	CHMP1A	0.397621	0.585385	0.172693
A_23_P106708	6187	RPS2	0.515269	0.685046	-0.442083
A_23_P106720	10607	TBL3	0.0304528	0.152852	-0.196388
A_23_P106727	9727	RAB11FIP3	0.084131	0.243183	0.287819
A_23_P106737	55692	LUC7L	0.00470168	0.0651466	-0.297614
A_23_P106741	5713	PSMD7	0.0818003	0.239428	0.230024
A_23_P106761	11151	CORO1A	0.249511	0.440661	-0.174921
A_23_P106773	6799	SULT1A2	0.458874	0.638949	0.163335
A_23_P106798	6477	SIAH1	0.187317	0.372183	-0.157525
A_23_P106806	83886	PRSS27	0.640545	0.780382	0.103748
A_23_P106814	NA		0.294559	0.487523	0.149131
A_23_P106822	28987	NOB1	0.606867	0.755911	-0.0605263
A_23_P106835	583	BBS2	0.0491533	0.188695	0.468232
A_23_P106844	4502	MT2A	0.998763	1	0.0011443
A_23_P10685	23640	HSPBP1	0.726988	0.840144	0.121705
A_23_P106859	10328	COX4NB	0.97707	0.991925	-0.00294555
A_23_P106874	83449	PMFBP1	0.218947	0.407296	0.201257
A_23_P106887	2521	FUS	0.00409272	0.0606	-0.491902
A_23_P106898	93129	ORAI3	0.59902	0.750193	0.0482857
A_23_P106906	5493	PPL	0.29371	0.486667	0.209868
A_23_P106922	4166	CHST6	0.00762251	0.0833173	0.273755
A_23_P106933	116285	ACSM1	0.648762	0.786421	0.0858736
A_23_P106945	113	ADCY7	0.340535	0.533183	0.0633533
A_23_P106973	10801	2009-09-01	0.00562143	0.071069	0.282613
A_23_P10699	29934	SNX12	0.0021392	0.0435272	-1.16206
A_23_P106998	51649	MRPS23	0.0101572	0.0946255	-0.411021
A_23_P10701	323	APBB2	0.0269349	0.14556	0.39312
A_23_P107036	8834	TMEM11	0.768602	0.86859	0.0203242
A_23_P107048	NA		0.710624	0.828912	-0.0428212
A_23_P107051	8557	TCAP	0.0256481	0.142174	0.423781
A_23_P107064	8711	TNK1	0.163858	0.344841	0.375233
A_23_P107073	6117	RPA1	0.167619	0.34917	0.132852
A_23_P107087	55720	TSR1	0.136253	0.312019	-0.125077
A_23_P107102	84643	KIF2B	0.390959	0.579468	-0.207775
A_23_P107116	7732	RNF112	0.148357	0.32669	0.25695
A_23_P107132	5957	RCVRN	0.287559	0.480531	0.193769
A_23_P107154	84669	USP32	0.289452	0.482498	0.0887595
A_23_P107166	79777	ACBD4	0.394079	0.582348	0.0819546
A_23_P107173	4222	MEOX1	0.0415307	0.175426	0.772671
A_23_P1072	476	ATP1A1	0.0463862	0.183959	0.255429
A_23_P107206	6774	STAT3	0.0945792	0.257515	-0.175311
A_23_P10721	9001	HAP1	0.0655179	0.214881	0.48822
A_23_P107211	5878	RAB5C	0.0022707	0.0446301	-0.535543
A_23_P107214	5878	RAB5C	0.00288373	0.0504406	-0.253599
A_23_P107238	54799	MBTD1	0.0159535	0.114996	-0.498624
A_23_P107247	8913	CACNA1G	0.00828616	0.0867028	0.596973
A_23_P107257	8405	SPOP	0.0514539	0.191992	-0.135212
A_23_P107283	3212	HOXB2	0.558998	0.719679	-0.09278
A_23_P107295	114659	LRRC37B	0.252235	0.443505	-0.0796683
A_23_P107307	9058	SLC13A2	0.0458564	0.183117	0.508337
A_23_P107313	6388	SDF2	0.0874842	0.247978	-0.31715
A_23_P107322	84940	CORO6	0.0263626	0.144077	0.401853
A_23_P107336	9744	ACAP1	0.329833	0.522438	0.131319
A_23_P107350	6517	SLC2A4	0.126089	0.299084	0.187423
A_23_P107351	728392	LOC728392	0.212183	0.399958	0.126544
A_23_P107369	10749	KIF1C	0.951111	0.977266	-0.0233239
A_23_P107373	4836	NMT1	0.873207	0.932307	-0.0157667
A_23_P107394	84667	HES7	0.727184	0.840304	-0.0612155
A_23_P107401	7077	TIMP2	0.0324507	0.157429	0.326147
A_23_P107412	5034	P4HB	0.287203	0.480194	0.156588
A_23_P107421	7083	TK1	0.0174585	0.119679	0.181615
A_23_P10743	5158	PDE6B	0.845674	0.916563	0.0234973
A_23_P107432	NA		0.0142385	0.109766	0.336039
A_23_P107443	100510248	LOC100510248	0.849082	0.918556	-0.0922627
A_23_P107454	83896	KRTAP3-1	0.138438	0.314384	0.753725
A_23_P107465	3881	KRT31	0.560853	0.721072	0.0934155
A_23_P107483	8392	OR3A3	0.52051	0.689195	-0.0838274
A_23_P107507	10951	CBX1	0.482994	0.659543	0.13433
A_23_P107513	79959	CEP76	0.311485	0.504536	0.104866
A_23_P10753	NA		1	1	-1.28866
A_23_P107531	125336	LOXHD1	0.144465	0.321539	-0.203416
A_23_P107552	22878	TRAPPC8	0.670638	0.801148	0.0579532
A_23_P107565	361	AQP4	0.00604071	0.0735156	-0.807441
A_23_P107578	NA		0.0168404	0.118234	-0.586453
A_23_P107587	4864	NPC1	0.0439929	0.179648	-0.109272
A_23_P107597	5205	ATP8B1	0.306367	0.499445	-0.118276
A_23_P107612	5874	RAB27B	0.0400348	0.172426	-0.408988
A_23_P107623	89777	SERPINB12	0.231104	0.420078	0.479341
A_23_P107644	6632	SNRPD1	0.0547538	0.197337	0.178535
A_23_P107653	2109	ETFB	0.464775	0.644429	0.0785584
A_23_P107661	5518	PPP2R1A	0.302059	0.495387	0.295167
A_23_P107673	140612	ZFP28	0.913438	0.956508	0.020923
A_23_P107684	25799	ZNF324	0.24654	0.437354	0.227356
A_23_P107693	54807	ZNF586	0.597774	0.749219	-0.0555168
A_23_P107701	2067	ERCC1	0.761357	0.863802	0.029292
A_23_P107714	57787	MARK4	0.569245	0.727727	0.20342
A_23_P107724	7771	ZFP112	0.0245121	0.139432	0.469414
A_23_P107735	973	CD79A	0.19349	0.379012	0.154639
A_23_P107744	53637	S1PR5	0.330099	0.522732	0.113315
A_23_P107750	53637	S1PR5	0.00174617	0.0387409	-0.632422
A_23_P107763	10781	ZNF266	0.00543276	0.0700928	0.224362
A_23_P107775	147744	TMEM190	0.243765	0.43433	0.430821
A_23_P107795	55101	ATP5SL	0.00435725	0.0625953	0.22822
A_23_P107801	84167	C19orf44	0.103663	0.270103	0.241005
A_23_P107847	353514	LILRA5	0.601734	0.752259	-0.0711125
A_23_P10785	143187	VTI1A	0.0621241	0.209706	-0.285415
A_23_P107855	84922	FIZ1	0.319385	0.512258	0.305699
A_23_P107881	147837	ZNF563	0.431209	0.61475	0.119206
A_23_P107894	78992	YIPF2	0.438798	0.62187	0.127089
A_23_P107903	57139	RGL3	0.119612	0.290648	-0.597963
A_23_P107911	5655	KLK10	0.258803	0.450417	0.184352
A_23_P107933	51231	VRK3	0.283248	0.476204	-0.225341
A_23_P107942	25888	ZNF473	0.142713	0.319442	0.0795951
A_23_P107959	51070	NOSIP	0.0786865	0.235303	0.245148
A_23_P107963	2523	FUT1	0.164785	0.346009	0.18478
A_23_P107974	2524	FUT2	0.946263	0.974745	-0.00680092
A_23_P10798	1267	CNP	9.01e-06	0.00121478	-0.879075
A_23_P107981	6820	SULT2B1	0.182878	0.367045	0.169299
A_23_P107994	54958	TMEM160	0.223745	0.412101	0.352882
A_23_P108028	7705	ZNF146	0.0344173	0.161049	-0.219896
A_23_P108042	9437	NCR1	0.0816287	0.239278	-1.06474
A_23_P108054	255043	TMEM86B	0.0525571	0.193772	0.375768
A_23_P108062	653499	LGALS7B	0.35876	0.55076	0.26716
A_23_P108075	56301	SLC7A10	0.0206926	0.129243	1.04524
A_23_P108082	84699	CREB3L3	0.477126	0.654581	-0.0754072
A_23_P108103	NA		0.111752	0.281302	-0.297036
A_23_P108129	7766	ZNF223	0.299159	0.492335	-0.197478
A_23_P108135	8943	AP3D1	0.289178	0.482257	-0.30095
A_23_P108143	2593	GAMT	0.0379654	0.168261	0.366732
A_23_P10815	9698	PUM1	0.0282867	0.148534	0.437787
A_23_P108157	27134	TJP3	0.468814	0.647952	0.0859313
A_23_P108170	5675	PSG6	0.00558392	0.0709452	-0.85246
A_23_P108180	116444	GRIN3B	0.0939469	0.256556	-0.198061
A_23_P108200	5864	RAB3A	0.0216842	0.13226	-0.48453
A_23_P108216	5348	FXYD1	0.6875	0.812621	0.054427
A_23_P108221	83983	TSSK6	0.891295	0.943023	0.0179774
A_23_P108244	1340	COX6B1	0.468392	0.647648	0.182471
A_23_P108265	26658	OR7C2	0.584646	0.73894	-0.133951
A_23_P108280	66002	CYP4F12	0.805551	0.891818	-0.0435003
A_23_P108294	8612	PPAP2C	0.935972	0.969319	0.0103822
A_23_P1083	2701	GJA4	0.1787	0.36233	-0.147926
A_23_P108303	4701	NDUFA7	0.397634	0.585385	-0.0782894
A_23_P108314	81794	ADAMTS10	0.417901	0.60286	-0.116512
A_23_P108326	2063	NR2F6	0.964632	0.984661	-0.006552
A_23_P108331	6449	SGTA	0.277111	0.469679	0.225407
A_23_P108342	51276	ZNF571	0.125729	0.298593	0.267669
A_23_P108376	63892	THADA	0.0130867	0.106185	0.231298
A_23_P10839	4735	2002-09-01	0.000931155	0.0266298	-0.288373
A_23_P108394	NA		0.109775	0.278668	0.170882
A_23_P108404	116987	AGAP1	0.0517615	0.192568	-0.304297
A_23_P108415	1615	DARS	0.82417	0.903333	-0.0285197
A_23_P108427	11227	GALNT5	0.0210061	0.130236	-0.425949
A_23_P108437	7855	FZD5	0.531491	0.697718	0.064286
A_23_P108463	57539	WDR35	0.82818	0.905887	-0.0249042
A_23_P108492	92935	MARS2	0.00160396	0.036945	-0.592488
A_23_P108501	2043	EPHA4	0.0331444	0.158668	0.165426
A_23_P108514	8576	STK16	0.21312	0.400846	0.118071
A_23_P108522	79137	FAM134A	0.0329783	0.158427	0.258366
A_23_P108534	NA		0.0319269	0.15628	-0.471475
A_23_P108546	5969	REG1P	0.546884	0.710037	-0.162606
A_23_P108554	1653	DDX1	0.0809577	0.238333	0.244816
A_23_P108564	8708	B3GALT1	0.225424	0.413809	-0.193204
A_23_P108574	23683	PRKD3	0.887043	0.940612	-0.010199
A_23_P10858	23141	ANKLE2	0.659661	0.794026	-0.0214489
A_23_P108592	5534	PPP3R1	0.00702119	0.0796098	-0.476904
A_23_P108604	9448	MAP4K4	0.582508	0.737271	-0.033717
A_23_P108641	84908	FAM136A	0.0730085	0.226906	-0.26929
A_23_P108657	151525	WDSUB1	0.329836	0.522438	0.143963
A_23_P108662	7841	MOGS	0.168488	0.350058	0.225363
A_23_P108673	84141	FAM176A	0.0288083	0.149815	-0.490319
A_23_P108699	2492	FSHR	0.0679102	0.218752	-0.314345
A_23_P10870	22845	DOLK	0.748079	0.854376	0.045513
A_23_P108708	51255	RNF181	0.78419	0.87904	-0.048571
A_23_P10873	7096	TLR1	0.0311452	0.154315	1.00926
A_23_P108734	55821	ALLC	0.359426	0.551432	0.210191
A_23_P108743	129446	XIRP2	0.751395	0.856588	-0.0567399
A_23_P108751	2274	FHL2	0.183703	0.368216	-0.147939
A_23_P108761	55571	C2orf29	0.04391	0.179564	-0.267562
A_23_P108785	10096	ACTR3	0.339122	0.531884	-0.126483
A_23_P108819	94097	SFXN5	0.000287098	0.0129487	-0.384301
A_23_P108823	114880	OSBPL6	0.502933	0.675172	-0.0282897
A_23_P108835	51646	YPEL5	0.0770994	0.233062	0.243166
A_23_P108842	1844	DUSP2	0.961196	0.982671	0.00544002
A_23_P10885	7767	ZNF224	0.496283	0.670141	0.0995859
A_23_P108871	84524	ZC3H8	0.80807	0.893376	-0.0263522
A_23_P108883	56660	KCNK12	0.39564	0.583812	0.0839997
A_23_P108911	57159	TRIM54	0.731872	0.843279	0.046689
A_23_P108922	55233	MOBKL1B	0.0421547	0.176459	-0.419683
A_23_P108932	56969	RPL23AP32	0.0255384	0.141938	0.172354
A_23_P108948	55686	MREG	0.0321668	0.156867	-0.208951
A_23_P108970	4867	NPHP1	0.0962601	0.259935	0.301035
A_23_P108990	NA		0.0799464	0.236801	-0.785583
A_23_P108994	6185	RPN2	0.10758	0.275793	-0.304637
A_23_P109001	9675	TTI1	0.419236	0.604045	0.0904986
A_23_P109017	6431	SRSF6	0.0152441	0.112949	-0.464693
A_23_P10902	2487	FRZB	0.0722034	0.225403	0.282296
A_23_P109026	60598	KCNK15	0.0174889	0.119747	0.333117
A_23_P109034	6385	SDC4	0.42912	0.613157	0.135233
A_23_P109055	112858	TP53RK	0.2542	0.44566	-0.109579
A_23_P109072	57167	SALL4	0.0392151	0.170827	0.231535
A_23_P10911	196463	PLBD2	0.0933205	0.255903	0.51653
A_23_P109122	57593	EBF4	0.273355	0.465813	0.321599
A_23_P109133	551	AVP	0.0423696	0.176882	-0.338996
A_23_P109143	5621	PRNP	0.273535	0.46589	-0.232324
A_23_P109171	631	BFSP1	0.0288879	0.150031	0.209092
A_23_P109184	3642	INSM1	0.286817	0.479789	0.164975
A_23_P109193	63908	NAPB	0.0209768	0.130145	-0.413652
A_23_P109201	57136	C20orf3	0.012137	0.102707	0.779535
A_23_P109224	140732	SUN5	0.133299	0.30818	0.176562
A_23_P109229	140732	SUN5	0.470388	0.649179	-0.0752469
A_23_P109235	22913	RALY	0.442152	0.624573	-0.0597173
A_23_P109254	9584	RBM39	0.116671	0.287328	0.415237
A_23_P109269	3911	LAMA5	0.239926	0.430332	0.325509
A_23_P10927	83877	TM2D2	0.00294282	0.0510172	-0.680091
A_23_P109286	2897	GRIK1	0.0472703	0.185306	0.186493
A_23_P109304	6526	SLC5A3	0.0144572	0.110658	-0.63737
A_23_P109320	53820	DSCR6	0.0925712	0.254675	-0.094614
A_23_P109322	5121	PCP4	0.0612412	0.208148	-0.742314
A_23_P109333	8209	C21orf33	0.00638939	0.0759027	0.24194
A_23_P109345	754	PTTG1IP	0.26004	0.451917	0.143039
A_23_P10936	85285	KRTAP4-1	0.392998	0.581379	0.22329
A_23_P109382	2928	GSC2	0.0280049	0.147733	-0.564726
A_23_P109393	421	ARVCF	0.152276	0.331351	0.216321
A_23_P109410	80764	THAP7	0.00686259	0.078814	-0.287327
A_23_P109420	9790	BMS1	0.00548411	0.0704413	-0.398018
A_23_P109427	2953	GSTT2	0.00903635	0.0902845	0.162301
A_23_P109436	135	ADORA2A	0.491067	0.666174	0.100296
A_23_P109442	89781	HPS4	0.0709808	0.223587	0.329072
A_23_P109446	89781	HPS4	0.108564	0.277001	0.153878
A_23_P109452	11200	CHEK2	0.0317081	0.155842	0.46997
A_23_P10947	246329	STAC3	0.345336	0.537845	-0.232207
A_23_P109470	8563	THOC5	0.00904171	0.0902854	-0.146616
A_23_P109488	113791	PIK3IP1	0.726846	0.840095	-0.0560196
A_23_P109508	4689	NCF4	0.730885	0.84254	0.0586398
A_23_P109547	54471	SMCR7L	0.53416	0.699855	0.0716843
A_23_P10956	5239	PGM5	0.0583422	0.203456	0.196368
A_23_P109593	25771	TBC1D22A	0.933875	0.968309	0.00708088
A_23_P109606	6305	SBF1	0.112517	0.28236	0.315349
A_23_P109614	4336	MOBP	0.16013	0.340737	0.23134
A_23_P109636	26018	LRIG1	0.509806	0.680324	0.0864613
A_23_P109643	80325	ABTB1	0.120372	0.291716	0.411251
A_23_P109655	80723	TMEM22	0.4293	0.613232	-0.113503
A_23_P10966	2562	GABRB3	0.240382	0.430744	-0.139956
A_23_P109677	100506946	LOC100506946	0.00769867	0.0836563	-0.798265
A_23_P109682	64343	AZI2	0.1904	0.375849	0.165498
A_23_P109720	NA		1	1	-2.4228
A_23_P109733	152185	SPICE1	0.0200021	0.127204	0.43821
A_23_P109768	9616	RNF7	0.982208	0.994552	-0.00160885
A_23_P109774	27107	ZBTB11	0.260327	0.452168	0.21766
A_23_P109785	8856	NR1I2	0.73267	0.843856	0.0663917
A_23_P109794	23243	ANKRD28	0.00016178	0.0088712	-0.832016
A_23_P10980	23284	LPHN3	0.110532	0.279665	-0.486313
A_23_P109812	6854	SYN2	0.958024	0.980749	-0.00838527
A_23_P109821	10474	TADA3	0.201404	0.388189	0.247305
A_23_P109843	3568	IL5RA	0.504426	0.676152	0.0910786
A_23_P109864	2693	GHSR	0.798061	0.887336	0.0759179
A_23_P10987	NA		0.284798	0.47777	-0.128793
A_23_P109877	80335	WDR82	0.873881	0.932771	0.0130796
A_23_P109881	3700	ITIH4	1.4e-05	0.00161494	0.341438
A_23_P109895	65010	SLC26A6	0.27493	0.467297	0.183003
A_23_P109907	286676	ILDR1	0.119133	0.290117	-0.392876
A_23_P109913	10663	CXCR6	0.499954	0.672858	-0.121081
A_23_P109928	9861	PSMD6	0.0128421	0.104949	-0.282291
A_23_P109934	51409	HEMK1	0.0133212	0.106903	0.555591
A_23_P10995	27303	RBMS3	0.443407	0.625646	-0.0908368
A_23_P109950	93	ACVR2B	0.30401	0.497283	0.133111
A_23_P109964	84692	CCDC54	0.231679	0.42079	0.216526
A_23_P109974	51560	RAB6B	0.0890671	0.250052	-0.181178
A_23_P109988	942	CD86	0.0287137	0.149588	-0.701095
A_23_P110005	84276	NICN1	0.155029	0.334668	0.180324
A_23_P110022	2624	GATA2	0.32307	0.515625	0.19009
A_23_P110031	51385	ZNF589	0.0134693	0.10744	0.161054
A_23_P11005	11173	ADAMTS7	0.0787444	0.235333	0.475785
A_23_P110052	668	FOXL2	0.343065	0.535631	0.177065
A_23_P110062	8893	EIF2B5	0.66857	0.799784	0.0297927
A_23_P110076	348793	WDR53	0.180003	0.363749	-0.0763223
A_23_P110090	55779	WDR52	0.0260257	0.143364	0.481872
A_23_P110108	84561	SLC12A8	0.00263415	0.0481925	-0.387999
A_23_P110116	6452	SH3BP2	0.293231	0.486228	0.171598
A_23_P110122	901	CCNG2	0.0817883	0.239428	0.579108
A_23_P110135	57728	WDR19	0.859668	0.924616	0.0235968
A_23_P110151	83478	ARHGAP24	0.0559845	0.199279	-0.353198
A_23_P110167	4258	MGST2	0.134216	0.309272	0.162654
A_23_P11017	NA		0.926483	0.963911	-0.0113982
A_23_P110175	1519	CTSO	9.72e-05	0.00643887	-0.54643
A_23_P110184	6307	SC4MOL	0.000346457	0.0146592	-1.06437
A_23_P110196	51191	HERC5	0.0506731	0.19109	0.493287
A_23_P1102	58	ACTA1	0.0658942	0.215461	0.104349
A_23_P110204	6374	CXCL5	0.0191219	0.124731	-1.47655
A_23_P110212	2180	ACSL1	0.560152	0.720671	0.0608483
A_23_P110234	1446	CSN1S1	0.027409	0.14658	-0.462054
A_23_P110243	57721	METTL14	0.296315	0.489479	-0.0706069
A_23_P11025	7739	ZNF185	0.28757	0.480531	0.0937873
A_23_P110253	3815	KIT	0.342669	0.535196	0.0631181
A_23_P110266	79625	NDNF	0.963349	0.983754	0.0165292
A_23_P110276	84740	AFAP1-AS1	0.496625	0.670453	0.113042
A_23_P110288	79807	GSTCD	0.0210768	0.130496	-0.300432
A_23_P110299	6870	TACR3	0.799184	0.888006	0.0873482
A_23_P110304	246175	CNOT6L	0.470188	0.649059	0.034096
A_23_P110319	80157	CWH43	0.343556	0.536092	-0.148145
A_23_P11032	84679	SLC9A7	0.329798	0.522438	-0.164938
A_23_P110345	26511	CHIC2	0.00550967	0.0705799	-0.326853
A_23_P110362	8649	LAMTOR3	0.0499065	0.189636	-0.316097
A_23_P110386	64854	USP46	0.167224	0.348668	-0.267364
A_23_P110403	27295	PDLIM3	0.0538677	0.196022	0.405577
A_23_P110412	441027	TMEM150C	0.150391	0.329224	0.212754
A_23_P110430	4487	MSX1	0.385114	0.574629	0.163048
A_23_P110433	23398	PPWD1	0.174752	0.357385	0.192226
A_23_P110445	10307	APBB3	0.0637377	0.212114	0.48116
A_23_P110462	29930	PCDHB1	0.956668	0.980167	-0.0130683
A_23_P110473	4671	NAIP	0.18345	0.367831	0.204186
A_23_P110492	10299	2006-03-01	0.0741179	0.228535	0.236535
A_23_P110504	81037	CLPTM1L	0.0979874	0.262346	0.21006
A_23_P11051	57187	THOC2	0.867578	0.929045	-0.020188
A_23_P110531	10468	FST	0.173838	0.356439	-0.163175
A_23_P110557	90249	UNC5A	0.139559	0.315761	0.256199
A_23_P110569	55521	TRIM36	0.0362991	0.164639	0.383755
A_23_P110571	375449	MAST4	0.499983	0.672858	0.154885
A_23_P110585	153768	PRELID2	0.556316	0.717734	-0.0710782
A_23_P110598	134430	WDR36	0.215661	0.403712	0.196213
A_23_P110606	9794	MAML1	0.34946	0.541921	0.109071
A_23_P110611	54826	GIN1	0.249844	0.441078	0.156399
A_23_P110624	1501	CTNND2	0.234975	0.424386	-0.0656431
A_23_P110643	51265	CDKL3	0.136911	0.312635	0.206946
A_23_P110655	NA		0.361589	0.553418	-0.10007
A_23_P110661	23517	SKIV2L2	0.162138	0.34287	0.238009
A_23_P110686	8614	STC2	0.290545	0.483655	-0.208811
A_23_P110699	91975	ZNF300	1	1	-1.7484
A_23_P11070	84636	GPR174	0.601665	0.752218	-0.0746058
A_23_P110704	10569	SLU7	0.11455	0.284916	0.245821
A_23_P11071	64840	PORCN	0.659561	0.793951	0.0876068
A_23_P110712	1843	DUSP1	0.614661	0.761984	-0.0434121
A_23_P110725	5562	PRKAA1	0.257082	0.448946	-0.13187
A_23_P110764	9499	MYOT	0.0896191	0.250794	0.583479
A_23_P110777	3950	LECT2	0.764722	0.866159	0.0618152
A_23_P110787	9522	SCAMP1	0.0300423	0.15194	-0.336424
A_23_P110791	1436	CSF1R	0.0355428	0.163443	0.700156
A_23_P110802	64946	CENPH	0.00601637	0.0734315	-0.346056
A_23_P11081	8852	AKAP4	0.0169035	0.118328	-1.51804
A_23_P110811	1350	COX7C	0.411189	0.597066	0.292376
A_23_P110837	50805	IRX4	0.179407	0.363047	0.202041
A_23_P110846	9337	CNOT8	0.321605	0.514288	0.114596
A_23_P110851	7015	TERT	0.24664	0.437475	0.0941249
A_23_P110879	10758	TRAF3IP2	0.000417774	0.0163538	-0.271242
A_23_P110882	23270	TSPYL4	0.0403642	0.173053	0.425962
A_23_P110896	26503	SLC17A5	0.292611	0.485613	-0.138233
A_23_P110903	135295	SRSF12	0.00341339	0.0550547	-0.783926
A_23_P110941	2941	GSTA4	0.162704	0.343576	0.306708
A_23_P110957	2295	FOXF2	0.783097	0.878473	0.0240294
A_23_P110961	51660	BRP44L	0.11854	0.289493	-0.180868
A_23_P111000	5698	PSMB9	0.0693182	0.221051	-0.425464
A_23_P111005	25844	YIPF3	0.00239447	0.046026	0.483777
A_23_P111020	6722	SRF	0.654422	0.790319	-0.0498284
A_23_P11103	9210	BMP15	0.135619	0.311141	-0.430978
A_23_P111037	8350	HIST1H3A	0.927961	0.964861	0.0117908
A_23_P111041	8346	HIST1H2BI	0.108544	0.276998	-0.179172
A_23_P111054	3018	HIST1H2BB	0.247873	0.438922	0.0972007
A_23_P111088	81697	OR2B2	0.204569	0.391528	-0.16776
A_23_P111092	26716	OR2H1	0.15889	0.339384	0.229781
A_23_P111112	57176	VARS2	0.228342	0.416943	0.0989299
A_23_P111126	10866	HCP5	0.00547636	0.0703858	0.526311
A_23_P111132	3303	HSPA1A	0.0314858	0.155214	0.47155
A_23_P111141	7917	BAG6	0.0375082	0.167411	0.365933
A_23_P111155	221527	ZBTB12	0.998986	1	0.000181873
A_23_P111171	8705	B3GALT4	0.0419243	0.176111	0.344108
A_23_P111188	9278	ZBTB22	0.182317	0.366349	0.253404
A_23_P11119	NA		0.0494713	0.189068	-0.341459
A_23_P111194	25803	SPDEF	0.254287	0.445736	0.153898
A_23_P111206	2289	FKBP5	0.00437713	0.062771	-0.362375
A_23_P111228	51805	COQ3	0.0302698	0.152282	-0.242913
A_23_P111240	9749	PHACTR2	0.405253	0.592011	-0.0860204
A_23_P111260	4907	NT5E	0.00254167	0.047303	-0.548018
A_23_P111267	83699	SH3BGRL2	0.706371	0.825859	0.0854995
A_23_P111273	51256	TBC1D7	0.204901	0.391843	0.16348
A_23_P111288	51522	TMEM14C	0.065843	0.215373	-0.210743
A_23_P111297	10799	RPP40	0.664771	0.79719	-0.050986
A_23_P111303	22828	SCAF8	0.306815	0.499897	0.164268
A_23_P111306	22828	SCAF8	0.261677	0.453608	0.169193
A_23_P111311	9590	AKAP12	0.00206231	0.0426828	-0.792502
A_23_P111321	383	ARG1	0.99039	0.998696	-0.00175723
A_23_P111343	9774	BCLAF1	0.484621	0.660687	0.0655746
A_23_P111360	3298	HSF2	0.000242526	0.0116543	-0.664065
A_23_P111361	285755	PPIL6	0.0267385	0.145145	0.314425
A_23_P111373	57380	MRS2	0.0614902	0.208631	-0.178799
A_23_P111381	9474	ATG5	0.639561	0.779721	0.0425611
A_23_P111395	6582	SLC22A2	0.705113	0.824905	0.0875845
A_23_P111402	84870	RSPO3	0.540421	0.704479	-0.0892241
A_23_P111413	95681	TSGA14	0.160424	0.341103	-0.135862
A_23_P11144	1121	CHM	0.00720001	0.0806558	-0.478397
A_23_P111452	116988	AGAP3	0.634977	0.77644	0.0847032
A_23_P111480	64940	STAG3L4	0.432779	0.616195	-0.0728801
A_23_P111481	51593	SRRT	6.46e-06	0.000966322	0.373002
A_23_P111487	51593	SRRT	0.0759692	0.231424	0.269978
A_23_P111492	64598	MOSPD3	0.0570985	0.201397	0.596932
A_23_P111506	100316904	SAP25	0.437068	0.620041	-0.238531
A_23_P111517	64409	WBSCR17	0.7168	0.832498	-0.0295675
A_23_P111525	NA		0.333253	0.526202	0.103222
A_23_P111531	2737	GLI3	0.770611	0.869812	0.0289681
A_23_P111571	3200	HOXA3	0.957971	0.980749	0.00863964
A_23_P111583	948	CD36	0.575889	0.732774	-0.0616256
A_23_P111593	9265	CYTH3	0.081341	0.238928	-0.251776
A_23_P11160	79649	MAP7D3	0.756371	0.860466	-0.0321756
A_23_P111604	30010	NXPH1	0.654571	0.790428	-0.0610921
A_23_P111621	9569	GTF2IRD1	0.151911	0.330838	0.145668
A_23_P111635	51657	STYXL1	0.0155331	0.113745	-0.310312
A_23_P111657	6469	SHH	0.10733	0.275338	0.196314
A_23_P111662	340273	ABCB5	0.740648	0.84913	0.0582983
A_23_P111672	26136	TES	0.00833267	0.0869401	-0.176663
A_23_P111698	7975	MAFK	0.0184053	0.122771	-0.282961
A_23_P1117	54879	ST7L	0.284516	0.477492	0.240368
A_23_P111701	2791	GNG11	0.196346	0.382369	0.140995
A_23_P111712	7978	MTERF	0.704364	0.824288	-0.0334586
A_23_P111724	154661	RUNDC3B	0.0653898	0.21465	-0.586442
A_23_P111737	10268	RAMP3	0.348527	0.540941	0.138143
A_23_P111745	83637	ZMIZ2	0.559952	0.720558	0.168856
A_23_P111753	64983	MRPL32	0.987415	0.996991	-0.00338757
A_23_P111766	NA		0.629717	0.772836	-0.0888836
A_23_P111797	84214	DKFZP434F142	0.285865	0.478876	0.268384
A_23_P111804	64761	PARP12	0.0832164	0.241788	0.197332
A_23_P111811	54556	ING3	0.139991	0.316059	0.141902
A_23_P111826	6677	SPAM1	0.533811	0.69951	0.0749388
A_23_P111835	1738	DLD	0.800982	0.888984	0.0210439
A_23_P111843	10467	ZNHIT1	0.185992	0.370718	0.20011
A_23_P111860	55698	RADIL	0.850615	0.919414	-0.0128558
A_23_P111865	7589	ZSCAN21	0.694497	0.817447	-0.0439932
A_23_P111888	115908	CTHRC1	0.864717	0.927365	0.0360549
A_23_P111919	29942	PURG	0.0207598	0.129419	-0.32016
A_23_P11192	10477	UBE2E3	0.031911	0.156239	0.282376
A_23_P111929	51633	OTUD6B	0.00430053	0.0624341	-0.631801
A_23_P111947	1015	CDH17	0.354712	0.546902	0.183315
A_23_P111961	84549	MAK16	0.372828	0.563558	0.0610477
A_23_P111978	51305	KCNK9	0.132902	0.307733	0.256593
A_23_P111981	66004	LYNX1	0.213615	0.401459	0.376692
A_23_P111995	4017	LOXL2	0.222425	0.410877	-0.11084
A_23_P112004	23639	LRRC6	0.160739	0.341409	-0.358631
A_23_P11201	2857	GPR34	0.0883173	0.249089	0.395088
A_23_P112016	10395	DLC1	0.272944	0.465503	0.147099
A_23_P112026	3620	IDO1	0.0339945	0.160352	0.920336
A_23_P112061	138050	HGSNAT	0.247788	0.438841	-0.193017
A_23_P112078	9258	MFHAS1	0.156005	0.336007	-0.219002
A_23_P112086	1670	DEFA5	0.303833	0.497093	0.215525
A_23_P112100	54212	SNTG1	0.874049	0.932865	0.0117117
A_23_P112103	79792	GSDMD	0.521876	0.690201	0.118933
A_23_P112113	9897	KIAA0196	0.0162101	0.115887	0.537909
A_23_P112135	23471	TRAM1	0.625669	0.770119	0.0731654
A_23_P11214	55922	NKRF	0.0379241	0.168205	0.223055
A_23_P112159	27161	EIF2C2	0.608826	0.757532	-0.094603
A_23_P112162	8694	DGAT1	0.0635668	0.211838	0.325318
A_23_P112173	25769	SLC24A2	0.530402	0.697021	-0.0928093
A_23_P112187	84929	FIBCD1	0.511936	0.68227	0.165279
A_23_P112201	23081	KDM4C	0.028559	0.149199	0.274998
A_23_P112220	3641	INSL4	0.638912	0.779341	-0.0860371
A_23_P11224	93380	MMGT1	0.0102778	0.0951612	0.295496
A_23_P112241	25822	DNAJB5	0.0740802	0.228471	0.13916
A_23_P112251	2790	GNG10	0.109762	0.278652	0.254053
A_23_P112260	2790	GNG10	1.45e-06	0.000313237	-0.541008
A_23_P112275	9568	GABBR2	0.850615	0.919414	0.0217588
A_23_P112289	7111	TMOD1	0.0307476	0.153215	0.618547
A_23_P112296	1621	DBH	0.37495	0.565495	-0.111049
A_23_P112311	22954	TRIM32	0.632771	0.775084	-0.0339038
A_23_P112327	29991	OBP2A	0.0425465	0.177159	0.353172
A_23_P112341	80010	RMI1	0.0917192	0.253641	0.240089
A_23_P11237	6872	TAF1	0.667948	0.799518	-0.0257814
A_23_P112397	54461	FBXW5	0.260839	0.452711	0.242092
A_23_P112406	9328	GTF3C5	0.37948	0.56979	0.120706
A_23_P112412	54881	TEX10	0.102888	0.269478	0.165344
A_23_P112429	11224	RPL35	0.722876	0.837397	-0.238545
A_23_P11244	64219	PJA1	0.0913804	0.253055	0.248464
A_23_P112452	2681	GGTA1P	0.780647	0.876771	0.0643034
A_23_P112470	6366	CCL21	0.266311	0.458502	0.169045
A_23_P112478	318	NUDT2	0.274848	0.467227	0.105789
A_23_P112481	360	AQP3	0.248351	0.439445	0.25362
A_23_P112482	360	AQP3	0.809672	0.894279	-0.0453382
A_23_P112512	92014	MCART1	0.905386	0.951519	0.0042401
A_23_P112531	399665	FAM102A	0.149686	0.328434	0.160651
A_23_P112548	81932	HDHD3	0.670051	0.800679	-0.0803436
A_23_P112554	1306	COL15A1	0.181056	0.36487	0.272216
A_23_P11256	139599	MAGEE2	0.474079	0.652322	0.0791805
A_23_P112564	3751	KCND2	0.0472548	0.185295	0.920635
A_23_P112596	132	ADK	0.00331909	0.0544744	-0.560734
A_23_P1126	54741	LEPROT	0.622133	0.767511	-0.0800793
A_23_P112602	55223	TRIM62	0.0449669	0.181512	0.378743
A_23_P112613	5718	PSMD12	0.0114997	0.100103	-0.283892
A_23_P11262	8263	F8A1	0.16692	0.348439	0.179723
A_23_P112634	201895	C4orf34	0.177058	0.360325	0.274233
A_23_P112646	28	ABO	0.0450542	0.181674	-0.396775
A_23_P112652	25904	CNOT10	0.00231496	0.045004	0.128389
A_23_P112666	2301	FOXE3	0.396657	0.584652	0.0859952
A_23_P112673	55055	ZWILCH	0.162883	0.343758	0.240198
A_23_P112698	10687	PNMA2	0.102009	0.268152	-0.193711
A_23_P112726	6335	SCN9A	0.0223028	0.133921	-0.476864
A_23_P112774	11156	PTP4A3	0.0879601	0.248529	0.217516
A_23_P11279	79868	ALG13	0.00564892	0.0711993	-0.40678
A_23_P112798	1397	CRIP2	0.164924	0.346231	0.117754
A_23_P112801	11261	CHP	0.174029	0.356634	0.232291
A_23_P112820	1903	S1PR3	0.0195251	0.126028	-1.04664
A_23_P112825	51451	LCMT1	0.578628	0.734663	0.0695529
A_23_P112846	441024	MTHFD2L	0.962444	0.983216	-0.00480951
A_23_P112859	1469	CST1	0.401861	0.589091	0.11823
A_23_P11286	3188	HNRNPH2	0.12526	0.298253	0.243173
A_23_P112874	2262	GPC5	0.733928	0.844684	0.0555849
A_23_P112883	340371	NRBP2	0.0124103	0.103482	0.446787
A_23_P112916	170691	ADAMTS17	0.0773437	0.233427	-0.497016
A_23_P112921	80765	STARD5	0.115107	0.285574	-0.241569
A_23_P11295	100272147	MTCP1NB	0.87215	0.931711	-0.0141889
A_23_P112950	55729	ATF7IP	0.000109288	0.00693575	0.71998
A_23_P112957	NA		0.298586	0.491753	0.241499
A_23_P112982	55530	SVOP	0.599487	0.750512	0.0945056
A_23_P113005	1942	EFNA1	0.0497637	0.18955	0.238244
A_23_P113019	348980	HCN1	0.166257	0.347783	0.160319
A_23_P113026	5073	PARN	0.00380059	0.0582399	0.127562
A_23_P113034	83938	C10orf11	0.149121	0.32772	0.112129
A_23_P113056	NA		0.0386228	0.169652	0.431535
A_23_P11309	55558	PLXNA3	0.136404	0.312085	-0.337903
A_23_P113101	NA		0.230664	0.419613	0.188464
A_23_P113111	367	AR	0.0930296	0.255469	-0.354186
A_23_P113161	81563	C1orf21	0.240734	0.431009	0.141748
A_23_P113184	79068	FTO	0.0203041	0.127974	0.469189
A_23_P113204	2248	FGF3	0.83728	0.911464	0.0562805
A_23_P113212	55076	TMEM45A	0.127767	0.301153	-0.164601
A_23_P113237	64109	CRLF2	0.571334	0.729401	0.0343953
A_23_P113245	3516	RBPJ	0.0108841	0.0974766	0.293357
A_23_P113258	10125	RASGRP1	0.218905	0.40727	0.333338
A_23_P113263	NA		0.285999	0.478953	0.195325
A_23_P113283	64393	ZMAT3	0.866955	0.928796	-0.0146554
A_23_P11331	90843	TCEAL8	0.881591	0.937665	0.0197655
A_23_P113311	54681	P4HTM	0.0358214	0.163833	0.200608
A_23_P113317	54681	P4HTM	0.328551	0.521352	-0.0333024
A_23_P113328	360023	ZBTB41	0.297799	0.490864	-0.200482
A_23_P113351	8404	SPARCL1	0.522872	0.691072	-0.112012
A_23_P113367	117583	PARD3B	0.498348	0.671763	-0.0923948
A_23_P113380	55031	USP47	0.266671	0.458794	0.124892
A_23_P113382	23426	GRIP1	0.868693	0.929414	-0.023661
A_23_P113393	8862	APLN	0.750444	0.856028	0.025915
A_23_P113405	26505	CNNM3	0.119844	0.290935	0.414195
A_23_P11341	90736	FAM104B	0.0889333	0.249847	0.195427
A_23_P113417	80233	C17orf70	0.449102	0.630524	0.160572
A_23_P113441	55164	SHQ1	0.0789401	0.235591	-0.194221
A_23_P113453	NA		0.356905	0.549085	0.518804
A_23_P113462	55605	KIF21A	0.596608	0.748247	0.0723142
A_23_P113471	158584	FAAH2	0.00730447	0.0812677	0.475303
A_23_P113523	8225	GTPBP6	0.0938821	0.256518	0.200752
A_23_P11353	10159	ATP6AP2	0.968842	0.987067	0.00721407
A_23_P113549	NA		0.0451095	0.18175	-1.00909
A_23_P113553	4110	MAGEA11	0.576427	0.733118	0.0982428
A_23_P113570	3651	PDX1	0.971419	0.988591	-0.00510259
A_23_P113572	930	CD19	0.781691	0.877433	-0.0421386
A_23_P113613	64866	CDCP1	0.539085	0.703408	0.120889
A_23_P11362	9767	PHF16	1.9e-05	0.00205802	-0.701704
A_23_P113623	84311	MRPL45	0.0692617	0.220999	0.186582
A_23_P113634	865	CBFB	0.0521818	0.193242	0.255089
A_23_P113645	NA		0.743441	0.851119	-0.0306744
A_23_P113656	10382	TUBB4	0.587653	0.741353	0.119166
A_23_P113682	142680	SLC34A3	0.0314771	0.155209	0.476873
A_23_P113692	NA		0.151852	0.330783	-0.3892
A_23_P113701	5154	PDGFA	0.0804364	0.237575	0.285883
A_23_P113716	NA		0.406485	0.592966	0.638271
A_23_P11372	3251	HPRT1	0.0441102	0.179817	-0.24091
A_23_P113728	92170	MTG1	0.0719266	0.225061	-0.400237
A_23_P113738	NA		0.0956905	0.259152	-0.546827
A_23_P113748	79750	ZNF385D	0.406771	0.593214	0.247364
A_23_P113762	NA		0.986602	0.996848	0.00267606
A_23_P113777	9358	ITGBL1	0.947048	0.975176	0.00527261
A_23_P113789	10869	USP19	0.790019	0.882753	-0.0150118
A_23_P113793	79413	ZBED2	0.354238	0.546566	-0.266806
A_23_P113803	11104	KATNA1	0.691528	0.815575	0.030939
A_23_P113811	NA		0.0831331	0.241666	-0.416849
A_23_P113825	138151	NACC2	0.82739	0.90541	0.0161041
A_23_P113841	NA		0.588197	0.741668	0.0838697
A_23_P113888	129563	DIS3L2	0.573587	0.730832	0.153455
A_23_P11390	9084	VCY	0.761505	0.863886	-0.0462892
A_23_P113952	NA		0.968546	0.986937	0.0123744
A_23_P113966	55763	EXOC1	0.0412334	0.174754	0.124537
A_23_P11397	83868	TTTY13	0.261105	0.452967	-0.194647
A_23_P113972	55763	EXOC1	0.787017	0.881053	0.0355101
A_23_P113994	55243	KIRREL	0.0217089	0.132345	0.736006
A_23_P114008	79853	TM4SF20	0.0335912	0.159514	-0.571559
A_23_P114048	NA		0.0566839	0.200715	1.7738
A_23_P114057	54910	SEMA4C	0.0146813	0.111345	0.579418
A_23_P114061	80036	TRPM3	0.0158375	0.114689	-1.5965
A_23_P114075	2186	BPTF	0.438671	0.621777	-0.136469
A_23_P11408	442862	PRY2	0.00868691	0.0889074	0.473007
A_23_P114084	5251	PHEX	0.0207008	0.129243	-0.273266
A_23_P114095	51360	MBTPS2	0.0277833	0.147499	-0.395715
A_23_P114105	23641	LDOC1	0.412171	0.597835	0.164054
A_23_P114118	10389	SCML2	0.0226886	0.13471	-0.294767
A_23_P114134	10214	SSX3	0.0533014	0.194947	-0.328234
A_23_P114144	28952	CCDC22	0.507512	0.678611	0.0543489
A_23_P114155	27238	GPKOW	0.289972	0.483109	0.13756
A_23_P114164	29978	UBQLN2	0.129873	0.303754	0.332176
A_23_P114172	54885	TBC1D8B	0.0724829	0.22582	0.284986
A_23_P114185	7102	TSPAN7	0.921971	0.961363	0.0165542
A_23_P114210	5456	POU3F4	0.890135	0.942574	-0.0159172
A_23_P114221	5931	RBBP7	0.00450313	0.0639472	0.296188
A_23_P114232	10549	PRDX4	0.103551	0.269921	0.131625
A_23_P114259	140456	ASB11	0.587439	0.741236	-0.137978
A_23_P114275	10857	PGRMC1	0.00494256	0.0668336	-0.575426
A_23_P114282	28985	MCTS1	0.370597	0.561594	-0.171685
A_23_P114299	2833	CXCR3	0.184025	0.368539	0.264469
A_23_P114307	5030	P2RY4	0.0075138	0.0826578	0.287138
A_23_P114314	1046	CDX4	0.229479	0.41845	0.170939
A_23_P114349	170626	XAGE3	0.856474	0.922706	0.0279217
A_23_P114353	55998	NXF5	0.241923	0.432156	0.284836
A_23_P114361	4204	MECP2	0.174512	0.357179	0.18828
A_23_P114374	5956	OPN1LW	0.243712	0.434254	-0.266185
A_23_P114381	26576	SRPK3	0.0697137	0.221583	0.297204
A_23_P114405	9643	MORF4L2	0.577431	0.733803	-0.0774639
A_23_P114414	79836	LONRF3	0.6216	0.767186	-0.0563215
A_23_P114423	9104	RGN	0.277946	0.47057	0.169369
A_23_P114445	57692	MAGEE1	0.0945834	0.257515	0.239221
A_23_P114466	90665	TBL1Y	0.012533	0.103936	0.378613
A_23_P1145	55149	MTPAP	0.746496	0.853266	-0.0307117
A_23_P114582	NA		0.0906856	0.252246	0.302231
A_23_P114585	80003	PCNXL2	0.035372	0.163041	-0.321087
A_23_P114597	6706	SPRR2G	0.0821983	0.240175	-0.393107
A_23_P11461	7335	UBE2V1	0.0441607	0.179909	-0.659712
A_23_P114616	81573	ANKRD13C	0.341181	0.533506	0.0736315
A_23_P114626	462	SERPINC1	0.507804	0.678817	0.121092
A_23_P114649	60672	MIIP	0.531602	0.697819	-0.0941614
A_23_P114656	3065	HDAC1	0.0169065	0.118328	0.31477
A_23_P114662	1429	CRYZ	0.00389258	0.0589882	-0.477494
A_23_P114670	27237	ARHGEF16	0.211535	0.399428	0.268747
A_23_P114689	55616	ASAP3	0.00156252	0.0362965	0.487312
A_23_P114707	9563	H6PD	0.213424	0.401247	0.10689
A_23_P114713	1580	CYP4B1	0.0332878	0.158984	1.01175
A_23_P114736	3766	KCNJ10	0.550158	0.712482	0.0586893
A_23_P114740	3075	CFH	0.580415	0.735838	0.0844749
A_23_P114774	10654	PMVK	0.550661	0.712976	0.0654748
A_23_P114783	142	PARP1	0.109522	0.278336	0.245309
A_23_P114808	51102	MECR	0.895097	0.945387	-0.0159451
A_23_P114814	58480	RHOU	0.246582	0.437391	0.203537
A_23_P114826	64960	MRPS15	0.355429	0.547615	-0.154639
A_23_P114839	2275	FHL3	0.266528	0.45873	-0.0796351
A_23_P114857	30814	PLA2G2E	0.79793	0.887238	-0.047645
A_23_P114862	10218	ANGPTL7	0.918125	0.959183	-0.0181201
A_23_P114879	51361	HOOK1	0.00728002	0.081153	0.495185
A_23_P114883	2331	FMOD	0.0786523	0.235266	-0.184377
A_23_P114903	3310	HSPA6	0.0886274	0.249426	0.145626
A_23_P114929	25874	BRP44	0.154669	0.334199	-0.191698
A_23_P114934	84944	MAEL	0.146854	0.324846	0.165958
A_23_P114947	5997	RGS2	0.19119	0.376701	-0.126554
A_23_P114952	252839	TMEM9	0.0210563	0.130409	-0.266843
A_23_P114968	5738	PTGFRN	0.225958	0.414304	-0.148229
A_23_P114983	84676	TRIM63	0.473309	0.651546	0.159908
A_23_P115011	54507	ADAMTSL4	0.158353	0.338662	0.468235
A_23_P115021	88	ACTN2	0.159505	0.340015	-0.28919
A_23_P115022	128218	TMEM125	0.694449	0.817442	0.0903247
A_23_P115036	9670	IPO13	0.110708	0.27976	0.263415
A_23_P115046	8891	EIF2B3	0.00228628	0.0446748	-0.93491
A_23_P115052	6016	RIT1	0.596731	0.748355	-0.0428581
A_23_P115064	1382	CRABP2	0.0960583	0.259725	0.169095
A_23_P11507	26009	ZZZ3	0.159607	0.340153	0.136181
A_23_P115091	57111	RAB25	0.796245	0.886125	-0.0383737
A_23_P115105	26099	C1orf144	0.757383	0.861279	-0.0171294
A_23_P115118	656	BMP8B	0.362248	0.553958	0.185993
A_23_P115124	81559	TRIM11	0.34776	0.540144	0.194294
A_23_P115137	10542	HBXIP	0.500714	0.673488	-0.0880549
A_23_P115149	79084	WDR77	0.0603006	0.206744	-0.212457
A_23_P115161	2532	DARC	0.408922	0.594891	0.109252
A_23_P115167	23507	LRRC8B	0.918648	0.959471	-0.00638477
A_23_P115190	4803	NGF	0.882453	0.938145	0.0154984
A_23_P115192	83417	FCRL4	1	1	-0.631314
A_23_P115200	83417	FCRL4	0.941891	0.972132	0.0245631
A_23_P115201	83417	FCRL4	0.0362719	0.164639	-0.547499
A_23_P115202	49860	CRNN	0.781396	0.877319	0.0607117
A_23_P115215	6944	VPS72	0.173937	0.356536	0.205203
A_23_P115223	10456	HAX1	0.291623	0.484561	-0.148598
A_23_P115246	8547	FCN3	0.0876297	0.248115	0.264454
A_23_P115261	183	AGT	0.840808	0.913656	0.052691
A_23_P115286	8915	BCL10	0.00275284	0.0492774	-1.15978
A_23_P115313	64222	TOR3A	0.883038	0.938356	0.00951328
A_23_P115316	64222	TOR3A	0.553408	0.715268	-0.0553742
A_23_P115331	27245	AHDC1	0.177245	0.360546	0.256645
A_23_P115346	1939	EIF2D	0.187194	0.372069	-0.239838
A_23_P115356	8574	AKR7A2	0.00229493	0.0447632	0.423238
A_23_P115366	51727	CMPK1	0.309566	0.502663	-0.0984777
A_23_P115375	653604	HIST2H3D	0.460514	0.640427	-0.063706
A_23_P115407	2944	GSTM1	0.00329268	0.0541516	-0.295881
A_23_P115417	23179	RGL1	0.0538976	0.196061	0.117322
A_23_P11543	2517	FUCA1	0.0188785	0.12418	0.236072
A_23_P115444	8995	TNFSF18	0.0896623	0.250795	-0.964492
A_23_P115460	6146	RPL22	0.0974623	0.261567	-0.283805
A_23_P115467	6276	S100A5	0.010379	0.0955622	0.489721
A_23_P115478	29943	PADI1	0.975735	0.991011	0.0046904
A_23_P115482	29089	UBE2T	0.424878	0.609175	0.0252149
A_23_P115492	79805	VASH2	0.947946	0.975644	0.00510513
A_23_P115519	84648	LCE3D	0.661658	0.79526	-0.0623101
A_23_P115523	65094	JMJD4	0.735912	0.846113	-0.0492236
A_23_P115534	79932	KIAA0319L	0.0146435	0.111209	0.29191
A_23_P115563	81472	OR2C3	0.0949114	0.25798	-0.377504
A_23_P115573	149345	SHISA4	0.113239	0.283314	0.236868
A_23_P115597	22852	ANKRD26	0.188141	0.373296	0.180507
A_23_P115608	57584	ARHGAP21	0.733688	0.844479	0.0506694
A_23_P115616	NA		0.051665	0.192325	-0.316327
A_23_P115636	1787	TRDMT1	0.513919	0.684091	0.0892258
A_23_P11564	9813	KIAA0494	0.658049	0.793071	-0.0592489
A_23_P115645	10659	CELF2	0.744218	0.851698	-0.0434465
A_23_P115652	653509	SFTPA1	0.998052	1	-0.000444019
A_23_P115683	79803	HPS6	0.261303	0.453171	0.187111
A_23_P115699	5662	PSD	0.336097	0.528836	-0.154531
A_23_P115703	84108	PCGF6	0.000623475	0.0208333	-0.447698
A_23_P115726	220963	SLC16A9	0.990222	0.998601	0.00140779
A_23_P115732	648	BMI1	0.085572	0.245363	0.217772
A_23_P115743	63877	FAM204A	0.053041	0.194585	0.188208
A_23_P115762	11319	ECD	0.722954	0.837462	-0.0302461
A_23_P115780	26103	LRIT1	0.0489995	0.188441	0.367399
A_23_P115785	92565	FANK1	0.00352953	0.0560894	0.724343
A_23_P115792	59338	PLEKHA1	0.00149281	0.0354607	0.336288
A_23_P115805	93426	SYCE1	0.49306	0.667805	-0.0824487
A_23_P115824	3189	HNRNPH3	0.199358	0.38577	0.192105
A_23_P115838	26148	C10orf12	0.112257	0.282001	0.225483
A_23_P115842	55749	CCAR1	0.396382	0.584424	0.176764
A_23_P115861	220992	ZNF485	0.150233	0.329	-0.203336
A_23_P115862	118881	COMTD1	0.231082	0.420078	0.116802
A_23_P115872	55165	CEP55	0.57515	0.732182	-0.0275082
A_23_P115885	9562	MINPP1	0.000953907	0.0270285	-0.45377
A_23_P115902	NA		0.00371363	0.057543	-0.407561
A_23_P115919	5264	PHYH	0.659457	0.79392	0.0519718
A_23_P115922	1979	EIF4EBP2	0.207608	0.395076	0.243993
A_23_P115932	338567	KCNK18	0.00154089	0.0359571	-1.49104
A_23_P115955	219927	MRPL21	0.422088	0.60664	0.156894
A_23_P11598	127396	ZNF684	0.551789	0.713863	-0.0778377
A_23_P115998	6688	SPI1	0.278135	0.470746	-0.261716
A_23_P116007	9479	MAPK8IP1	0.671425	0.801721	-0.0617983
A_23_P116013	10929	SRSF8	0.32183	0.514443	-0.308134
A_23_P116016	10929	SRSF8	0.0522909	0.193313	0.0832215
A_23_P116025	9440	MED17	0.712018	0.829669	0.0317446
A_23_P116037	7108	TM7SF2	0.00643032	0.0760217	-0.487358
A_23_P116081	84153	RNASEH2C	2.91e-07	0.000102769	0.318686
A_23_P116091	10072	DPP3	0.82231	0.902308	0.0191244
A_23_P116114	5140	PDE3B	0.890892	0.942888	0.0141367
A_23_P116123	1111	CHEK1	0.422466	0.60695	-0.0665624
A_23_P116145	414301	DDI1	0.271092	0.463575	0.377264
A_23_P116168	84437	KIAA1826	0.494394	0.668871	0.0879831
A_23_P116173	120376	C11orf93	0.43478	0.618142	0.154151
A_23_P116187	83875	BCO2	0.0265544	0.144586	0.261348
A_23_P116195	NA		0.306697	0.499785	0.263158
A_23_P116207	56912	IFT46	0.0682265	0.219206	-0.0943328
A_23_P116235	4192	MDK	0.050184	0.190109	0.58745
A_23_P116249	2900	GRIK4	0.479971	0.656792	0.109618
A_23_P116259	55800	SCN3B	0.160459	0.341124	-0.18387
A_23_P116264	4900	NRGN	0.413138	0.598539	0.315305
A_23_P116280	7490	WT1	0.011429	0.0998699	-0.626852
A_23_P116286	272	AMPD3	0.795776	0.885852	-0.0362299
A_23_P11629	199964	TMEM61	0.161737	0.342433	0.096438
A_23_P116371	931	MS4A1	0.0376421	0.167532	-0.444359
A_23_P116376	79869	CPSF7	0.228338	0.416943	0.360181
A_23_P116387	3619	INCENP	0.868468	0.929398	-0.0111698
A_23_P116414	11145	PLA2G16	0.0187966	0.123861	0.445813
A_23_P116430	10083	USH1C	0.775139	0.872832	-0.0448354
A_23_P116435	51214	IGF2AS	0.784118	0.87904	-0.0499739
A_23_P11644	6703	SPRR2D	0.661778	0.79526	-0.133492
A_23_P116473	NA		0.139909	0.316018	-0.525184
A_23_P116512	79899	PRR5L	0.146557	0.324434	0.214875
A_23_P11652	7398	USP1	0.378482	0.568791	0.0845494
A_23_P116523	NA		0.38423	0.57399	-0.229337
A_23_P116533	23075	SWAP70	0.758602	0.862119	0.0284517
A_23_P116557	3965	LGALS9	0.0886651	0.249435	0.571254
A_23_P116578	51585	PCF11	0.134936	0.310302	0.135019
A_23_P116587	4975	OMP	0.777377	0.874632	-0.0356169
A_23_P116602	57558	USP35	0.0285908	0.149335	0.308679
A_23_P116614	10873	ME3	0.0208432	0.129733	0.262998
A_23_P116624	9152	SLC6A5	0.0613839	0.208426	-0.168206
A_23_P11664	9295	SRSF11	0.583694	0.738167	0.122352
A_23_P116640	79345	OR51B2	0.888912	0.941741	-0.0313498
A_23_P116642	65012	SLC26A10	0.0779186	0.23427	0.312303
A_23_P116653	79370	BCL2L14	0.940913	0.971895	-0.0155515
A_23_P116679	5036	PA2G4	0.32555	0.518298	-0.20557
A_23_P116682	6601	SMARCC2	0.100731	0.266227	0.360914
A_23_P116694	6231	RPS26	0.980192	0.993642	0.013015
A_23_P116712	11228	RASSF8	1	1	-0.239039
A_23_P11674	5737	PTGFR	0.520843	0.689344	-0.114695
A_23_P116741	9271	PIWIL1	0.0707475	0.22323	0.209376
A_23_P116743	338799	LOC338799	0.00135795	0.0337685	0.454793
A_23_P116765	3906	LALBA	0.721954	0.836681	-0.073069
A_23_P116797	60314	C12orf10	0.350313	0.542751	0.150004
A_23_P116809	22818	COPZ1	0.0435319	0.178856	-0.269343
A_23_P116829	7334	UBE2N	0.00132444	0.0332512	-0.251579
A_23_P116840	60673	C12orf44	0.303381	0.49665	-0.144932
A_23_P11685	5321	PLA2G4A	0.00620091	0.0747097	0.511222
A_23_P116850	3849	KRT2	0.788516	0.881937	0.0659203
A_23_P116868	53919	SLCO1C1	0.450211	0.631605	0.200071
A_23_P116872	5545	PRB4	0.334205	0.526995	0.114694
A_23_P116890	5544	PRB3	0.657184	0.792416	0.0559822
A_23_P116898	2	A2M	0.485767	0.661524	-0.212712
A_23_P116902	420	ART4	0.0965797	0.260323	-0.252301
A_23_P116913	121536	AEBP2	0.200403	0.387024	0.0734854
A_23_P116942	3902	LAG3	0.800531	0.888793	0.0241111
A_23_P11697	127540	HMGB4	0.117957	0.288903	0.20371
A_23_P116980	7289	TULP3	0.00861237	0.0886758	-0.346609
A_23_P116999	51184	GPN3	0.0262914	0.143957	-0.269516
A_23_P1170	93550	ANUBL1	0.106456	0.274061	0.146479
A_23_P117037	25875	LETMD1	0.474179	0.652416	0.0619439
A_23_P11705	55108	BSDC1	0.12018	0.291383	0.30194
A_23_P117059	9194	SLC16A7	0.0262178	0.143803	0.281753
A_23_P117068	6636	SNRPF	0.487115	0.662751	0.0767285
A_23_P117082	50865	HEBP1	0.0933289	0.255903	0.198654
A_23_P117095	8074	FGF23	0.043289	0.178525	-0.683891
A_23_P117104	362	AQP5	0.356475	0.548639	-0.177008
A_23_P117125	5916	RARG	0.620368	0.766341	0.0682774
A_23_P11713	8073	PTP4A2	0.107728	0.275915	-0.208372
A_23_P117146	11108	PRDM4	0.0589191	0.204157	0.0992495
A_23_P117157	8803	SUCLA2	0.531878	0.697964	-0.077221
A_23_P117163	55213	RCBTB1	0.0655826	0.214973	0.496586
A_23_P117175	143	PARP4	0.0555318	0.198595	0.178285
A_23_P117190	29103	DNAJC15	0.0991204	0.264098	0.269182
A_23_P117198	78988	MRP63	0.157758	0.338104	0.205411
A_23_P117225	2073	ERCC5	0.0970582	0.261065	0.279152
A_23_P117238	79587	CARS2	0.00634877	0.0756465	-0.397065
A_23_P117242	6541	SLC7A1	0.263753	0.455801	-0.158992
A_23_P117261	122042	RXFP2	0.110701	0.27976	-0.560327
A_23_P117274	4285	MIPEP	0.750649	0.856151	-0.0312642
A_23_P117286	1203	CLN5	0.0570327	0.201242	0.419579
A_23_P11729	51043	ZBTB7B	0.0397683	0.172079	0.287047
A_23_P117298	2155	F7	0.941889	0.972132	-0.0129977
A_23_P1173	3026	HABP2	0.13402	0.309168	0.397752
A_23_P117302	NA		0.144887	0.322128	-0.443127
A_23_P117346	8816	DCAF5	0.0321884	0.156867	0.304285
A_23_P117363	866	SERPINA6	0.0243904	0.139154	0.563465
A_23_P117380	90050	FAM181A	0.98809	0.997309	0.00182599
A_23_P117387	117153	MIA2	0.0249033	0.140338	-0.966506
A_23_P11739	83881	MIXL1	0.653188	0.789432	0.366958
A_23_P117411	2290	FOXG1	0.568743	0.727293	0.0752613
A_23_P117416	2972	BRF1	0.670832	0.801305	0.141144
A_23_P11742	375260	WASH2P	0.0141259	0.109565	0.30391
A_23_P117424	80344	DCAF11	0.0699311	0.221754	0.164246
A_23_P117437	64806	IL25	0.220157	0.408659	-0.311895
A_23_P11744	100287171	WASH1	0.116715	0.287361	0.418909
A_23_P117447	55017	C14orf119	0.0897015	0.250836	-0.332885
A_23_P117464	122664	TPPP2	0.947706	0.97552	0.00790013
A_23_P117480	NA		0.247182	0.438153	-0.241914
A_23_P117494	4522	MTHFD1	0.103667	0.270103	0.213879
A_23_P117506	51635	DHRS7	0.021749	0.132494	-0.440638
A_23_P117515	5926	ARID4A	0.25185	0.443125	-0.136574
A_23_P11752	4985	OPRD1	0.377324	0.567626	0.0846886
A_23_P117527	55030	FBXO34	0.267186	0.45934	0.0739481
A_23_P117540	6815	STYX	0.0169268	0.118362	-0.389041
A_23_P117546	6655	SOS2	0.0674272	0.217971	0.405173
A_23_P117558	2287	FKBP3	0.334837	0.527586	-0.155293
A_23_P117580	957	ENTPD5	0.908884	0.95363	0.00474987
A_23_P117582	122953	JDP2	0.948836	0.976071	0.0108281
A_23_P117599	10598	AHSA1	0.00749666	0.0825358	-0.377022
A_23_P117602	3002	GZMB	0.176508	0.359684	0.160401
A_23_P117623	55775	TDP1	0.384081	0.573881	0.0888426
A_23_P117635	4287	ATXN3	0.0711133	0.223764	-0.2464
A_23_P11764	26523	EIF2C1	0.0605592	0.207166	0.226975
A_23_P117654	4644	MYO5A	0.0527982	0.194216	-0.131839
A_23_P117662	3067	HDC	0.848022	0.91787	0.0260685
A_23_P117679	7782	SLC30A4	0.732959	0.84402	-0.0140283
A_23_P117683	25764	C15orf63	0.565574	0.72489	-0.0381467
A_23_P117694	10391	CORO2B	0.289619	0.482683	-0.181866
A_23_P117721	6218	RPS17	0.633998	0.775914	-0.298993
A_23_P117727	123263	MTFMT	0.00602115	0.0734315	-0.744133
A_23_P117734	145748	LYSMD4	0.00673643	0.0780984	0.372346
A_23_P11774	51118	UTP11L	0.0328479	0.158145	-0.404278
A_23_P117743	140460	ASB7	0.148199	0.326519	0.12262
A_23_P117759	145781	GCOM1	1.49e-07	6.35e-05	-0.552081
A_23_P117767	54939	COMMD4	0.0471563	0.18512	-0.184093
A_23_P117778	84993	UBL7	0.348868	0.541331	-0.127474
A_23_P117782	55323	LARP6	0.052097	0.193092	0.322579
A_23_P117797	54982	CLN6	0.97752	0.99221	0.00230313
A_23_P117805	8128	ST8SIA2	0.829891	0.907041	0.0283217
A_23_P117828	NA		0.876109	0.934104	-0.0195734
A_23_P117833	54893	MTMR10	0.208126	0.395567	-0.320768
A_23_P117851	594855	CPLX3	1	1	-1.08537
A_23_P117852	9768	KIAA0101	0.0792639	0.235917	-0.258365
A_23_P117862	56160	NDNL2	0.231099	0.420078	-0.146974
A_23_P11787	54361	WNT4	0.0500256	0.189765	0.624263
A_23_P117873	1133	CHRM5	0.0739018	0.228281	-0.255377
A_23_P117882	1381	CRABP1	0.875727	0.933926	-0.0216959
A_23_P117896	116179	TGM7	0.704748	0.824595	0.0282628
A_23_P117912	171177	RHOV	0.61539	0.762565	0.0534915
A_23_P117928	22893	BAHD1	0.0396916	0.171916	0.179128
A_23_P117933	2653	GCSH	0.0928507	0.25517	-0.184817
A_23_P117943	NA		0.0590902	0.204533	0.154358
A_23_P117955	353	APRT	0.257172	0.449004	0.187983
A_23_P117971	NA		0.0740792	0.228471	-0.190153
A_23_P117980	10300	KATNB1	0.260076	0.451961	0.169297
A_23_P117992	9914	ATP2C2	0.207148	0.394508	0.252303
A_23_P118	2135	EXTL2	0.313601	0.50655	0.124133
A_23_P11800	55450	CAMK2N1	0.71503	0.83136	0.0698469
A_23_P118002	7385	UQCRC2	0.228491	0.417134	0.128768
A_23_P118018	283897	C16orf54	0.739373	0.848424	-0.0823161
A_23_P118025	64174	DPEP2	0.0458075	0.183069	0.247654
A_23_P118038	10204	NUTF2	0.0468498	0.184623	-0.598579
A_23_P118042	55282	LRRC36	0.41289	0.598285	0.154487
A_23_P11806	1301	COL11A1	0.0441091	0.179817	-0.398038
A_23_P118061	51192	CKLF	0.0202767	0.12792	-0.305088
A_23_P118065	3294	HSD17B2	0.0542043	0.196375	-0.425767
A_23_P118086	124044	SPATA2L	0.0620953	0.209659	0.284533
A_23_P118095	6123	RPL3L	0.571181	0.729228	0.0691441
A_23_P118105	4716	NDUFB10	0.826341	0.904673	-0.0464802
A_23_P118113	6650	SOLH	0.683842	0.810233	-0.0795953
A_23_P118122	8786	RGS11	0.206742	0.393886	0.183438
A_23_P118135	NA		0.0024874	0.0468244	0.318989
A_23_P118150	23204	ARL6IP1	0.287891	0.480902	-0.198549
A_23_P118158	9956	HS3ST2	0.856633	0.922708	-0.0671011
A_23_P118174	5347	PLK1	0.0130269	0.105819	0.250429
A_23_P118185	83752	LONP2	0.495891	0.669831	0.0415255
A_23_P118195	NA		0.0884105	0.249216	1.12795
A_23_P118203	124220	ZG16B	0.127571	0.300876	0.336035
A_23_P118234	221223	CES5A	0.799912	0.888502	-0.0468997
A_23_P118246	51659	GINS2	0.480937	0.657763	-0.0424596
A_23_P118254	2294	FOXF1	0.98525	0.996185	-0.0030698
A_23_P118266	463	ZFHX3	0.0110083	0.0981818	0.311958
A_23_P118289	9274	BCL7C	0.779563	0.876061	0.0362096
A_23_P118300	81889	FAHD1	0.129614	0.303354	-0.373149
A_23_P118306	9093	DNAJA3	0.0994027	0.264539	0.118632
A_23_P118313	11345	GABARAPL2	0.100797	0.266255	0.368813
A_23_P118327	55623	THUMPD1	0.293847	0.48675	-0.0961883
A_23_P118334	64282	PAPD5	0.39482	0.583011	0.0784792
A_23_P118353	6730	SRP68	5.87e-06	0.000887381	-0.393192
A_23_P118370	NA		0.621781	0.76725	-0.0416957
A_23_P118392	51655	RASD1	0.356065	0.54831	0.0598979
A_23_P118406	79415	C17orf62	0.461462	0.641358	0.0981604
A_23_P11841	493	ATP2B4	0.0464762	0.184072	-0.289064
A_23_P118412	283987	C17orf28	0.153462	0.332713	0.282435
A_23_P118427	5606	MAP2K3	0.990837	0.998888	-0.00212385
A_23_P11843	10446	LRRN2	0.0336745	0.159742	0.156186
A_23_P118435	6613	SUMO2	0.0191402	0.12477	-0.2357
A_23_P118451	10948	STARD3	0.0135365	0.107724	-0.19342
A_23_P118462	124641	OVCA2	0.145927	0.323546	-0.220871
A_23_P118493	10040	TOM1L1	0.629808	0.772887	0.0569683
A_23_P118516	51030	FAM18B1	0.509403	0.680023	-0.0927726
A_23_P118536	55106	SLFN12	0.0590241	0.204374	0.336618
A_23_P118544	1213	CLTC	0.0853843	0.245131	0.314316
A_23_P118552	10614	HEXIM1	0.227335	0.415863	0.247284
A_23_P118571	50964	SOST	0.29597	0.489107	-0.256573
A_23_P118581	92591	ASB16	0.351476	0.543795	-0.107558
A_23_P11859	51478	HSD17B7	0.0247816	0.1401	-0.358802
A_23_P1186	389941	C1QL3	0.381068	0.571194	-0.123656
A_23_P118607	80755	AARSD1	0.689377	0.814054	-0.0357736
A_23_P118615	10351	ABCA8	0.450612	0.631898	0.124179
A_23_P11862	55732	C1orf112	0.0343406	0.160862	0.197439
A_23_P118633	64847	SPATA20	0.200823	0.387506	0.122888
A_23_P118643	1977	EIF4E	0.0135359	0.107724	-0.222024
A_23_P118649	1977	EIF4E	0.000201966	0.0104028	-0.490018
A_23_P118660	11056	DDX52	0.508087	0.679027	0.0669733
A_23_P118675	3211	HOXB1	0.420274	0.605051	-0.136991
A_23_P118690	7756	ZNF207	0.737965	0.847627	-0.0358691
A_23_P118693	8456	FOXN1	0.865879	0.928083	0.0139008
A_23_P118705	6388	SDF2	0.834954	0.909937	0.0183337
A_23_P118712	85464	SSH2	0.0507726	0.191155	-0.255161
A_23_P118722	432	ASGR1	0.191902	0.37742	0.199678
A_23_P11874	9019	MPZL1	0.0587657	0.204013	-0.301599
A_23_P118741	201232	SLC16A13	0.801446	0.889261	0.0741772
A_23_P118749	51009	DERL2	0.705063	0.824881	0.0395724
A_23_P118774	3837	KPNB1	0.10836	0.276773	0.239786
A_23_P118791	84314	TMEM107	0.0357836	0.163833	0.418657
A_23_P118815	332	BIRC5	0.0386839	0.169674	0.271143
A_23_P118834	7153	TOP2A	0.886965	0.940603	-0.0280202
A_23_P118842	83895	KRTAP1-5	0.815979	0.898293	-0.0387642
A_23_P118854	8688	KRT37	0.922372	0.961454	0.0113892
A_23_P118888	5048	PAFAH1B1	0.36141	0.55334	-0.113616
A_23_P118894	79170	PRR15L	0.244723	0.435416	0.333997
A_23_P118909	56984	PSMG2	0.0626181	0.210362	-0.251588
A_23_P118916	80148	PQLC1	0.240431	0.43078	0.215168
A_23_P118946	9331	B4GALT6	0.0166769	0.117711	-0.400544
A_23_P118967	284217	LAMA1	0.557088	0.718236	-0.0901078
A_23_P119006	NA		0.0678702	0.218676	-0.625387
A_23_P119015	5275	SERPINB13	0.00758993	0.0831238	-0.629382
A_23_P11902	NA		0.615769	0.762828	-0.0404646
A_23_P119023	201475	RAB12	5.22e-09	4.46e-06	-0.362804
A_23_P119040	80000	GREB1L	0.452874	0.633687	0.089994
A_23_P119042	4818	NKG7	0.0019224	0.0410354	0.42079
A_23_P119084	90233	ZNF551	0.0254414	0.141667	-0.230571
A_23_P119095	10848	PPP1R13L	0.307965	0.500917	0.301994
A_23_P119102	7408	VASP	0.791438	0.883614	0.0383983
A_23_P119130	6223	RPS19	0.589427	0.742625	-0.314081
A_23_P119141	9817	KEAP1	0.816629	0.898642	-0.0128503
A_23_P119143	7087	ICAM5	0.879568	0.936269	-0.0263869
A_23_P11915	54834	GDAP2	0.207356	0.394725	0.169209
A_23_P119152	NA		0.333428	0.526275	-0.142515
A_23_P119168	NA		0.769217	0.868974	0.0554383
[truncated: 39,503 more rows]

## Sheet: Ibuprofen
ProbeID	EntrezGeneID	GeneSymbol	pvalue	FDR	Fold Change (log2 signed ratio)
[truncated: 41,000 more rows]

[truncated: 8 more sheets: JFD03094 , KM11060, Latonduine, Minocycline H, Ouabagenin, Ouabain, PJ34, Low temparature]
