# Supplementary material for: Unravelling druggable signalling networks that control F508del-CFTR proteostasis
Source: eLife journal article supplement (doi:10.7554/elife.10365), 2015-12-22
Supplement: supp [file elife-10365-supp-v1.zip › elife_poa_e10365_Supplementary_File_2.xlsx]

## Sheet: Sheet3
	Supplementary file 2: Drug communities containing the 11 (F508del-CFTR correctors) extracted from the MANTRA drug similarity network assembled in (Iorio et al, 2010). The correctors belong to distinct communities most of which enriched for their primary mode of action. Full list of drug community annotations available at: http://www.pnas.org/content/suppl/2010/08/02/1000138107.DCSupplemental/SD01…
	Community identifier	Clustered drugs (* F508del-CFTR correctors)	Recurrent Feature/Mode-of-Action/Therapeutic-application (Manually curated)	Statistically Enriched Anatomical Therapeutic Chemical (ATC) codes				Statistically Enriched Targets
				ATC	Definition	p-value	odd-ratio	Target	p-value	odd-ratio
	16	HC_toxin	HDAC inhibitors	D06	ANTIBIOTICS AND CHEMOTHERAPEUTICS FOR DERMATOLOGICAL USE	0.0231987	8.08421
		vorinostat	HDAC inhibitors
		rifabutin	HDAC inhibitors
		scriptaid*	HDAC inhibitors
		trichostatin_A*	HDAC inhibitors
		valproic_acid	HDAC inhibitors
		idoxuridine
		mepacrine
		LY-294002	PI3K inhibitors
		bufexamac
		spironolactone
		pergolide
		fusidic_acid
		trimethobenzamide
		rosiglitazone	PI3K inhibitors
		diprophylline
	63	helveticoside	Na+/K+ - ATPase (sodium Potassium) membrane pump inhibitors	C01A	CARDIAC GLYCOSIDES	1.3297e-07	153.6	ATP1A1	0.00022535	62.5
		lanatoside_C	Na+/K+ - ATPase (sodium Potassium) membrane pump inhibitors	C01AA	Digitalis glycosides	3.3953e-05	153.6
		digoxin	Na+/K+ - ATPase (sodium Potassium) membrane pump inhibitors	C01	CARDIAC THERAPY	0.00096552	12.4541
		ouabain	Na+/K+ - ATPase (sodium Potassium) membrane pump inhibitors	C	CARDIOVASCULAR SYSTEM	0.049109	3.17793
		digoxigenin	Na+/K+ - ATPase (sodium Potassium) membrane pump inhibitors
		proscillaridin	Na+/K+ - ATPase (sodium Potassium) membrane pump inhibitors
		digitoxigenin	Na+/K+ - ATPase (sodium Potassium) membrane pump inhibitors
		strophanthidin*	Na+/K+ - ATPase (sodium Potassium) membrane pump inhibitors
		bisacodyl	Na+/K+ - ATPase (sodium Potassium) membrane pump inhibitors
		lycorine	Na+/K+ - ATPase (sodium Potassium) membrane pump inhibitors
		hydroquinine	Na+/K+ - ATPase (sodium Potassium) membrane pump inhibitors
	40	celastrol	Proteasome inhibitors and UPS modulators	R06AX	Other antihistamines for systemic use	0.0169567	9.48148
		MG-132	Proteasome inhibitors and UPS modulators	N01B	ANESTHETICS, LOCAL	0.0209024	8.53333
		5224221		N01	ANESTHETICS	0.0399816	6.09524
		MG-262	Proteasome inhibitors and UPS modulators
		thapsigargin*	calcium signal modulators
		puromycin	protein synthesis inhibitors (elongation inhibitors)
		ionomycin	calcium signal modulators
		piperlongumine
		disulfiram	Proteasome inhibitors and UPS modulators
		5253409
		1,4-chrysenequinone
		mometasone	Proteasome inhibitors and UPS modulators
		fendiline	calcium signal modulators
		tyrphostin_AG-1478
		econazole	calcium signal modulators
		cyproheptadine	calcium signal modulators
		isotretinoin
		(+)-chelidonine
		lynestrenol
		primaquine	protein synthesis inhibitors (elongation inhibitors)
		dienestrol
		pimethixene
		loxapine
		PF-00875133-00
		5230742
		dicycloverine
		mianserin
		dyclonine
		nalbuphine
		Y-27632
		betazole
		vinburnine
		propidium_iodide
		prilocaine
		PHA-00846566E
	14	GW-8510	CDK inhibitors	L01D	CYTOTOXIC ANTIBIOTICS AND RELATED SUBSTANCES	5.3189e-08	192	14		GSK3B	0.0002	62.5
		doxorubicin*	TopoII inhibitors	L01DB	Anthracyclines and related substances	5.3189e-08	192			TOP2A	0.0076	13.8889
		alsterpaullone	CDK inhibitors	L01	ANTINEOPLASTIC AGENTS	0.00010544	24
		H-7	CDK inhibitors	L	ANTINEOPLASTIC AND IMMUNOMODULATING AGENTS	0.000468	14.7692
		tyrphostin_AG-825
		camptothecin	TopoI inhibitors
		daunorubicin	TopoII inhibitors
		mitoxantrone	TopoII inhibitors
		ellipticine	CDK/TopoII inhibitors
		azacitidine
		fisetin	CDK inhibitors
		staurosporine	CDK inhibitors
		MS-275*	HDAC inhibitors
		bromopride
		gallamine_triethiodide
	41	chloramphenicol*	Anti-bacterial
		allantoin
		etofylline	Potassium channel blocker
		imidurea
		niridazole
		octopamine
		Prestwick-920
		roxarsone	Anti-bacterial
		torasemide	Potassium channel blocker
	42	chlorzoxazone*	Muscle relaxant	J01F	MACROLIDES, LINCOSAMIDES AND STREPTOGRAMINS	0.00789094	13.9636
		glibenclamide	Anti diabetic	A01AB	Antiinfectives and antiseptics for local oral treatment	0.00956896	12.6942
		clindamycin	antibiotics and bactericidals	A01	STOMATOLOGICAL PREPARATIONS	0.020073	8.72727
		dirithromycin	antibiotics and bactericidals	A01A	STOMATOLOGICAL PREPARATIONS	0.020073	8.72727
		lobeline		S01E	ANTIGLAUCOMA PREPARATIONS AND MIOTICS	0.020073	8.72727
		chlortetracycline	antibiotics and bactericidals	S01	OPHTHALMOLOGICALS	0.0251252	3.28556
		danazol		S	SENSORY ORGANS	0.0271917	3.21003
		clopamide
		ajmaline
		ampyrone
		betaxolol
		chlorhexidine	antibiotics and bactericidals
		methazolamide
		hydrastinine
		Prestwick-689
	19	PHA-00665752
		pseudopelletierine
		sulfapyridine
		harmaline
		AG-013608
		0198306-0000
		benfluorex
		PF-00562151-00
		erythromycin
		disopyramide
		AH-6809
		AH-23848
		deptropine
		dehydrocholic_acid
		0316684-0000
		adenosine_phosphate
		alprenolol
		genistein
		glycocholic_acid
		lobelanidine
		H-89
		glipizide
		dipivefrine
		6-bromoindirubin-3-oxime
		mebeverine
		STOCK1N-28457
		cotinine
		caffeic_acid
		CAY-10397
		levodopa
		pipemidic_acid
		salsolinol
		glafenine*	anthranilic acid derivative with analgesic properties
		AG-012559
		dinoprostone
		16,16-dimethylprostaglandin_E2
		propantheline_bromide
		orlistat
		sulpiride
		PHA-00816795
		PHA-00767505E
		metolazone
		practolol
		STOCK1N-35696
		hesperetin
		zaprinast
		oxybutynin
		ornidazole
		nilutamide
		SB-202190
	90	sulconazole	Imidazoles and Sulfonamides	C01BD	Antiarrhythmics, class III	0.00485862	14.2222	PLA2G4A	0.0008	12.0968
		phthalylsulfathiazole	Imidazoles and Sulfonamides	D10AA	Corticosteroids, combinations for treatment of acne	0.0139162	9.48148	SERPINA6	0.0098	6.0484
		cetirizine		R06AE	Piperazine derivatives	0.0265791	7.11111	CACNA1G	0.0331	6.4516
		medrysone	Corticosteroids	A03A	DRUGS FOR FUNCTIONAL BOWEL DISORDERS	0.0204073	4.74074
		tyloxapol		S01BA	Corticosteroids, plain	0.0277185	4.26667
		Prestwick-1084		D07	CORTICOSTEROIDS, DERMATOLOGICAL PREPARATIONS	0.0383504	2.99415
		omeprazole	Imidazoles and Sulfonamides	D07A	CORTICOSTEROIDS, PLAIN	0.0383504	2.99415
		promethazine
		famprofazone
		lorglumide
		metamizole_sodium	Imidazoles and Sulfonamides
		eucatropine
		pentoxyverine
		cefalexin
		liothyronine*	thyroid hormone affecting protein synthesis
		piperidolate
		amiodarone
		tropicamide
		riboflavin
		acepromazine
		latamoxef
		hexestrol
		meclozine
		monobenzone
		cyproterone
		(-)-MK-801
		ketanserin
		etofenamate
		trazodone
		pyrazinamide
		sulfafurazole	Imidazoles and Sulfonamides
		ronidazole	Imidazoles and Sulfonamides
		dexpropranolol
		capsaicin
		apramycin
		denatonium_benzoate
		nitrofurantoin
		naloxone
		tranylcypromine
		norethisterone
		fluocinonide	Corticosteroids
		ifenprodil
		oxybuprocaine
		sulfamerazine	Imidazoles and Sulfonamides
		cycloserine
		beta-escin
		clobetasol	Corticosteroids
		xylometazoline
		methapyrilene
		scopoletin
		Prestwick-674
		bezafibrate
		sertaconazole	Imidazoles and Sulfonamides
		difenidol
		anabasine
		ganciclovir
		sulfamethoxazole	Imidazoles and Sulfonamides
		adrenosterone
		fluorometholone	Corticosteroids
		cortisone	Corticosteroids
		mevalolactone
		flunarizine
		pentamidine
		aminophylline
		zoxazolamine
		ranitidine
		parbendazole	Imidazoles and Sulfonamides
		colecalciferol
		ethosuximide
		clorgiline
		furaltadone
		etanidazole	Imidazoles and Sulfonamides
		sulfinpyrazone
		pipenzolate_bromide
		nifurtimox
		methylprednisolone	Corticosteroids
		alverine
		prasterone
		bretylium_tosilate
