# Supplementary material for: Unravelling druggable signalling networks that control F508del-CFTR proteostasis
Source: eLife journal article supplement (doi:10.7554/elife.10365), 2015-12-22
Supplement: supp [file elife-10365-supp-v1.zip › elife_poa_e10365_Supplementary_File_3.xlsx]

## Sheet: Sheet1
CORE genes obtained by FIT analysis
Upregulated_CFBE dataset	Downregulated_CFBE dataset	Downregulated_MANTRA dataset	Genes selected for experimental validation (includes the hubs from IPA)
ABCA12	ABCG5	AKAP1	ASB8
ABCG1	ADAMTS19	AKAP8	C14orf106
ACPL2	ADAMTS9	C10orf26	CAMKK2
ACPP	ALPK1	C14orf106	CD2BP2
ACYP1	ARHGEF25	CCDC59	CSNK2A1
ADAM28	ATN1	CENPE	CTDSP1
AHI1	ATP13A4	DICER1	DSN1
AKAP9	BASP1	EHMT2	FBXO7
AKD1	BIN2	FAM128B	FLT1
ALOX5	C14orf162	GPATCH1	GTSE1
ALS2CR8	C16orf45	KIF20A	KDR
AMOT	C7orf69	MED1	MAP2K7
ANKRA2	CAPN6	MPPE1	MAP3K11
ANXA4	CISD3	NCAPH2	MAPK15
ARAP2	CLDN17	NOL3	MED1
ARFGAP3	COL14A1	ORC1L	MED13
ARID5B	CRCT1	ZNF443	NFKB2
ARMCX1	CTSC	ZCCHC10	NUP50
ARMCX3	DCD	ZC3H3	OSMR
ARRDC3	DCLK1	YWHAH	PDGFRA
ATG5	DLL3	XYLT2	PDGFRB
ATP6V1C2	DNALI1	WTAP	PIK3CB
ATP7A	DPCR1	WDR74	PIK3CG
AUH	EFHD2	WDR6	PROKR1
BACH1	EHD1	VPS72	PRPF8
BACH2	EPB41L4A	UNKL	RNF215
BANK1	ERBB4	TROAP	SART1
BAZ2A	EVI2B	TOP3A	SENP6
BBS12	FAM101B	TMEM121	STAG2
BBS2	FAM131C	TMEM115	TEP1
BCL2L11	FAM49B	TDP1	UBOX5
BCL6	FAM83A	TBC1D13	YWHAH
BDH2	FANCD2	TAX1BP3	AKAP1
BET1	FCRL4	STAG2	AKT1
BLNK	FERMT1	SNAPC4	AKT2
BRWD1	FGFBP1	SMCR7L	AKT3
C11orf54	FLJ45340	SLC4A1AP	ALPK1
C12orf23	FLNB	SLC25A6	CENPA
C12orf26	FOXK1	SH2B1	CENPE
C12orf48	FUT6	SETDB1	CSNK2A2
C14orf147	GJC3	SENP6	CSNK2B
C14orf49	GNB4	SCO2	CYCS
C18orf18	GRIN2B	SART1	DGCR8
C1D	GSC	SAP30L	DHX38
C1GALT1C1	GYG2	SAFB	DICER1
C20orf3	HLA-DRB4	RGS19	EHD1
C20orf30	HNF4G	RBM7	ELAVL1
C3orf14	HYDIN	RABIF	EXOSC4
C4orf34	IL25	RAB17	FARSA
C5orf53	ILDR1	PRPF8	FLNB
C6orf35	INO80B	PRPF4B	FLT4
C9orf44	IVL	PPAP2B	GEMIN4
C9orf68	KRT34	PDCD6	HNF4A
CAND1	LAIR1	PATZ1	IVL
CASC2	LCN15	PAQR4	KIF20A
CCDC113	LIMS3	NUP50	KRT34
CCDC121	LOC100132234	NSUN5P2	LMNB1
CCDC126	LOC100505915	NR2F2	MAL
CCDC148	LOC100506328	MYB	MAP2K5
CCDC57	LOC100510044	MRFAP1L1	MAP2K6
CCNT2	LOC388796	MKI67	MAPK1
CCPG1	LOC729059	METTL3	MAPK3
CD109	LRRC31	MEPCE	MAPK6
CDC37L1	MAL	MED13	MAPK7
CDC73	MATN2	MAP3K11	MITF
CEACAM1	MBL2	LMNB1	NFKB1
CEP44	MDGA1	LMF1	NOL3
CH25H	METTL21A	JRK	ONECUT1
CHD7	METTL7A	HYAL3	PATZ1
CIITA	MGC10814	HPS4	PDE11A
CISD2	MIR210HG	HMGXB4	PDE3A
CLCA2	MITF	GTSE1	PIK3CA
CLDN16	MRPL24	GTF3C4	PPAP2B
CLIC4	NCRNA00319	GPRC5C	PROKR2
CLIC5	NOG	GNPTAB	PRPF4B
CLK1	NPRL3	GLT8D1	PXN
CNGA1	NUDT22	GEMIN4	RELA
COL20A1	ODF3L2	GATAD1	RELB
COL21A1	ONECUT1	FOSL1	RGS19
CPEB3	OR8J1	FBXO7	SCO2
CRNKL1	OSMR	FARSA	SHC3
CTDSP2	PALMD	FAM120A	SPRR1A
CUL3	PCP4	FAM111A	SPRR1B
CXCL10	PDE11A	EXOSC4	SPRR3
CYBRD1	PDE3A	ENDOG	TLR4
CYP4B1	PDZD7	DSN1	TOP3A
DIDO1	PIF1	DNAJC2	TP53
DNAJA1	PLIN5	DHX38	TROAP
DPY19L2	POLR3D	DHX30	VHL
DRAM2	PXN	DGCR8	WDR6
DSC3	RAX2	CTDSP1	WTAP
DTX4	REG1B	COMMD9	ZAP70
DUOX2	RGL3	COMMD4	ZC3H3
ECEL1P2	RNF215	COIL	AKAP8
ECT2	S100A2	CHPF2	BIN2
EFCAB7	S100A7	CENPA	CYC1
EIF3H	SAGE1	CD2BP2	DCLK1
EIF4E	SHC3	CAMKK2	DNAJC2
ELF2	SLC22A3	C11orf61	ERBB4
ENTPD4	SLC47A1	ASB8	FGFBP1
EP300	SOSTDC1	ARID1A	MAP2K1
EPM2AIP1	SPRR1A	ANKLE2	MAP2K2
ERLIN2	SPRR1B		MAP2K3
ETV1	SPRR3		MAP2K4
ETV5	SULT1C2		MKI67
ETV7	TCEB3C		PIK3CD
EVI5	TCTN1		RBM7
FAM122C	TECRL		S100A7
FAM131B	TEP1
FAM150A	TLN2
FAM171B	TMPRSS15
FAM18B1	UBOX5
FAM198B	VHL
FAM47E	VNN1
FAM59A	VPS13D
FAM65B	ZAP70
FAM84A	ZFP36L2
FANCM
FAS
FASTKD1
FIP1L1
FNBP1L
FOXO1
FRAS1
FSIP1
G3BP2
GABARAPL2
GBP2
GEMIN8P4
GK
GNA13
GNAQ
GNPTAB
GPR110
GRAMD1C
GTF2I
H2AFJ
HBP1
HCG26
HNRNPR
HOOK1
HPSE
HS2ST1
HS3ST5
HSPA4
IBTK
IFIH1
IGFL2
IL20RA
IMMP2L
INPP5D
INTU
ITFG1
ITIH5
IVNS1ABP
JRKL
KAT6B
KATNAL2
KBTBD2
KBTBD3
KCND2
KCNJ2
KCNMB4
KDM3A
KIAA0182
KIAA1033
KIAA1107
KIAA1370
KIF1B
KL
KLF12
KLHL24
KTN1
KYNU
LAMTOR3
LAPTM4A
LCA5
LGALS3
LGALS8
LGR6
LHX9
LMO7
LNX1
LOC100129794
LOC100169752
LOC100287803
LOC100505930
LOC100505956
LOC100506012
LOC100506046
LOC100506262
LOC100506398
LOC100506538
LOC100507197
LOC100507398
LOC100507524
LOC220594
LOC286161
LOC401098
LOC401320
LOC541467
LOC541473
LOC728978
LPIN2
LRP1B
LUC7L3
LZTFL1
MAFB
MARCKS
MAT2B
MBD2
MBD5
MCEE
MCM9
METTL7A
MEX3B
MFSD4
MIA3
MLF1
MLLT4
MME
MMP13
MMP7
MRE11A
MRPL50
MXRA5
MYO6
N4BP2L1
N4BP2L2
NBR1
NEK1
NIPBL
NLGN4X
NOTCH2NL
NPNT
NR1D2
NUDCD1
NUP62CL
OK/SW-CL.58
OPRK1
OR2L13
OXGR1
PAFAH1B1
PAIP2
PAIP2B
PAPOLG
PBX1
PCDH7
PCDHB10
PCDHB18
PCMTD1
PCMTD2
PDCD2
PDE4B
PDE4D
PDE5A
PDGFD
PDK4
PFKFB2
PHC3
PIK3C2G
PIK3C3
PITX2
PIWIL4
PLEKHA7
PLRG1
PLSCR4
PPIE
PPIL6
PPM1D
PPP1CB
PPP6C
PPT1
PRPF4B
PSD2
PTPLAD2
PTPN4
PTPRR
PXDNL
QPCT
RAD21
RALGPS1
RAPGEF2
RAPGEF5
RASEF
RB1
RBAK
RBBP4
RBMXL1
REV3L
RFPL2
RFX3
RIC3
RRM2B
SAT1
SCAF8
SDR16C5
SEC62
SEL1L
SEPSECS
SERTAD4
SGSM1
SHPRH
SIRT4
SLAIN2
SLC11A2
SLC15A2
SLC16A7
SLC19A2
SLC1A3
SLC25A27
SLC35A1
SLFN12
SLFN13
SMARCA5
SMPDL3A
SNX16
SOS2
SPATA18
SPATA19
SPDYE1
SPDYE5
SPG20
SRSF1
STEAP4
STIM2
STK31
STK38L
STON1
STX11
SUV420H1
SYNPO2
TBX20
TET2
TFRC
THAP2
TIGD7
TLL1
TLR1
TLR3
TLR6
TMEM106B
TMEM123
TMEM18
TMEM20
TMEM237
TMEM39A
TMEM59
TMEM86A
TNFRSF11A
TNNT2
TP53INP1
TRAK2
TRIM22
TSPAN12
TSPAN2
TSPAN6
TTC23L
TTC28-AS1
TTC30A
TTC33
TUB
UBE2D1
USP25
UST
VTCN1
WDR17
WDR19
WDR33
WDR78
WNT8B
XRN1
YIPF5
YPEL1
YPEL2
YPEL5
ZBED5
ZBTB26
ZBTB38
ZC3H11A
ZFAND6
ZFPM2
ZNF10
ZNF184
ZNF214
ZNF217
ZNF230
ZNF233
ZNF323
ZNF404
ZNF449
ZNF483
ZNF525
ZNF546
ZNF571
ZNF577
ZNF586
ZNF606
ZNF613
ZNF649
ZNF780A
ZNF850
