# Supplementary material for: Unravelling druggable signalling networks that control F508del-CFTR proteostasis
Source: eLife journal article supplement (doi:10.7554/elife.10365), 2015-12-22
Supplement: supp [file elife-10365-supp-v1.zip › elife_poa_e10365_Supplementary_File_4.xlsx]

## Sheet: Sheet1
CFTR Proteostasis genes
siRNA-based knock-down effects		Overexpression-based effects		CFTR interactors (Wang et al. 2006)	CFTR related mlecules obtained from GENEGO (https://portal.genego.com/)
Gene symbol	Reference	Gene symbol	Reference
NEDD4L	(Caohuy et al. 2009)	USP10	(Bomberger et al. 2009)	SEPT6	ADCY1
AUP1	(Christianson et al. 2012)	SGK1	(Caohuy et al. 2009)	SEPT11	ADCY2
DERL3	(Christianson et al. 2012)	ANXA2	(Trzcinska-Daneluti et al. 2009)	AHSA1	ADCY3
DNAJC10	(Christianson et al. 2012)	AP2M1	(Trzcinska-Daneluti et al. 2009)	APC	ADCY4
EDEM1	(Christianson et al. 2012)	AQP3	(Trzcinska-Daneluti et al. 2009)	ATP2A2	ADCY5
ERLEC1	(Christianson et al. 2012)	C20orf7	(Trzcinska-Daneluti et al. 2009)	B3GNT9	ADCY6
ESYT1	(Christianson et al. 2012)	Cav2	(Trzcinska-Daneluti et al. 2009)	BAG2	ADCY7
FOXRED2	(Christianson et al. 2012)	CCBL1	(Trzcinska-Daneluti et al. 2009)	CANX	ADCY9
HERPUD1	(Christianson et al. 2012)	CCK	(Trzcinska-Daneluti et al. 2009)	CFL1	ADRB2
KIAA0090	(Christianson et al. 2012)	CCL2	(Trzcinska-Daneluti et al. 2009)	CSE1L	AHSA1
NGLY1	(Christianson et al. 2012)	CRYAB	(Trzcinska-Daneluti et al. 2009)	DNAJA1	AMFR
PSMD2	(Christianson et al. 2012)	DNAJC10	(Trzcinska-Daneluti et al. 2009)	DNAJA2	AP2A1
SELS	(Christianson et al. 2012)	DUSP3	(Trzcinska-Daneluti et al. 2009)	DTL	AP2A2
TTC35	(Christianson et al. 2012)	DYDC2	(Trzcinska-Daneluti et al. 2009)	GNB2L1	AP2B1
TXNDC16	(Christianson et al. 2012)	EDN1	(Trzcinska-Daneluti et al. 2009)	HSP90AA1	AP2M1
UBAC2	(Christianson et al. 2012)	FAM195A	(Trzcinska-Daneluti et al. 2009)	Hsp90ab1	AP2S1
UBXN4	(Christianson et al. 2012)	GAPDH	(Trzcinska-Daneluti et al. 2009)	HSPA1A	ARCN1
VCP	(Christianson et al. 2012)	GORASP1	(Trzcinska-Daneluti et al. 2009)	HSPA2	ATF2
VCPIP1	(Christianson et al. 2012)	HSPA4	(Trzcinska-Daneluti et al. 2009)	Hspa5	ATF6
DERL1	(Christianson et al. 2012)	HSPB8	(Trzcinska-Daneluti et al. 2009)	HSPA6	ATP2A1
KRT18	(Davezac et al. 2004)	HSPBP1	(Trzcinska-Daneluti et al. 2009)	HSPA8	ATP2A2
DNAJB12	(Grove et al. 2011)	LGALS3	(Trzcinska-Daneluti et al. 2009)	IPO11	CCL4
CALR	(Harada et al. 2006)	Park7	(Trzcinska-Daneluti et al. 2009)	IPO7	CEBPB
HDAC7	(Hutt et al. 2010)	PFDN2	(Trzcinska-Daneluti et al. 2009)	KIF5B	CHMP4B
ATF6	(Kerbiriou et al. 2007)	PPARG	(Trzcinska-Daneluti et al. 2009)	KIF5C	CLTA
SQSTM1	(Luciani et al. 2010)	PRG2	(Trzcinska-Daneluti et al. 2009)	Kpnb1	CLTB
BAG1	(Okiyoneda et al. 2010)	PRKCI	(Trzcinska-Daneluti et al. 2009)	PKD1	CLTC
CDC37	(Okiyoneda et al. 2010)	REG3A	(Trzcinska-Daneluti et al. 2009)	PPP2CA	COPA
DNAJA1	(Okiyoneda et al. 2010)	S100A8	(Trzcinska-Daneluti et al. 2009)	PPP2R1B	COPB1
DNAJA2	(Okiyoneda et al. 2010)	STAT1	(Trzcinska-Daneluti et al. 2009)	PPP2R2A	COPE
DNAJA3	(Okiyoneda et al. 2010)	TCEB2	(Trzcinska-Daneluti et al. 2009)	RCN1	COPG
DNAJB2	(Okiyoneda et al. 2010)	TCP10L	(Trzcinska-Daneluti et al. 2009)	Rcn2	COPG2
DNAJC27	(Okiyoneda et al. 2010)	TFG	(Trzcinska-Daneluti et al. 2009)	Ruvbl1	COPZ1
DNAJC3	(Okiyoneda et al. 2010)	TRIM31	(Trzcinska-Daneluti et al. 2009)	Slc9a3r1	COPZ2
DNAJC5	(Okiyoneda et al. 2010)	TRNAU1AP	(Trzcinska-Daneluti et al. 2009)	Tcp1	CREB1
DNAJC7	(Okiyoneda et al. 2010)	UBXN1	(Trzcinska-Daneluti et al. 2009)	Ubb	CRYAA
HGS	(Okiyoneda et al. 2010)	USP19	(Hassink et al. 2009)	Ubc	CTBP1
Hsp90AA1	(Okiyoneda et al. 2010)	UCHL1	(Henderson et al. 2010)		CTCF
HSPA8	(Okiyoneda et al. 2010)	AnxA5	(Le Drevo et al. 2008)		CUX1
MARCH2	(Okiyoneda et al. 2010)	BECN1	(Luciani et al. 2012)		DAD1
MARCH4	(Okiyoneda et al. 2010)	UVRAG	(Luciani et al. 2012)		DERL1
MDM2	(Okiyoneda et al. 2010)	CANX	(Norez et al. 2006)		DNAJA1
PARK2	(Okiyoneda et al. 2010)				DNAJB1
PPID	(Okiyoneda et al. 2010)				DNAJB6
PPIL2	(Okiyoneda et al. 2010)				DYNC1H1
SIAH1	(Okiyoneda et al. 2010)				DYNC1I2
STAM	(Okiyoneda et al. 2010)				DYNC1LI1
STIP1	(Okiyoneda et al. 2010)				DYNC1LI2
STUB1	(Okiyoneda et al. 2010)				DYNLL1
SYVN1	(Okiyoneda et al. 2010)				DYNLL2
TRIP12	(Okiyoneda et al. 2010)				DYNLRB1
TSG101	(Okiyoneda et al. 2010)				DYNLRB2
UBE2D3	(Okiyoneda et al. 2010)				DYNLT3
UBE2N	(Okiyoneda et al. 2010)				EDEM1
UBE3A	(Okiyoneda et al. 2010)				EIF2AK3
UBE4B	(Okiyoneda et al. 2010)				ERN1
UBE4A	(Okiyoneda et al. 2010)				ESR1
AHSA1	(Okiyoneda et al. 2010)				EZR
UBE2J1	(Okiyoneda et al. 2010)				FLNA
AMFR	(Okiyoneda et al. 2010)				FLNB
COPS5	(Tanguy et al. 2008)				FOS
BCAP31	(Wang et al. 2008),				FOSB
RNF5	(Younger et al. 2006)				FOSL1
					FOSL2
					FRA-2
					HDAC1
					HDAC4
					HDAC6
					HERPUD1
					HGS
					HNF1A
					HSP90AA1
					HSP90AB1
					HSP90B1
					HSPA14
					HSPA1A
					HSPA1L
					HSPA4
					HSPA5
					HSPA6
					HSPA8
					IL10
					IL8
					ITPR1
					ITPR2
					ITPR3
					JUN
					JUNB
					MAN1B1
					MAPK11
					MAPK12
					MAPK14
					NFATC1
					NFKB1
					NFKB2
					NOX4
					NPLOC4
					ORAI1
					PCAF
					PDE4D
					PLCB4
					PPIB
					PPM1A
					PPM1B
					PPM1F
					PPM1G
					PPM2C
					PPP3CA
					PPP3CB
					PPP3CC
					PPTC7
					PRKAA1
					PRKAB1
					PRKAB2
					PRKACA
					PRKACB
					PRKAG1
					PRKAR1A
					PRKAR1B
					PRKAR2A
					PRKAR2B
					PRKCE
					PSMA1
					PSMA2
					PSMA4
					PSMA5
					PSMA7
					PSMB3
					PSMB7
					PTGS2
					PTPN11
					RAB11A
					RAB11FIP2
					RAB4B
					RAB5A
					RAB7A
					RAB9A
					RELA
					RELB
					RHOQ
					RNF5
					ROCK2
					RPN1
					RPN2
					SAR1A
					SEC13
					SEC23A
					SEC23B
					SEC24A
					SEC24B
					SEC24C
					SEC24D
					SEC31A
					SNAP23
					SRF
					STAM2
					STIM1
					STT3A
					STT3B
					STX1A
					STX6
					STXBP1
					TCF7L2
					TUBA1A
					TUBA1B
					TUBA1C
					TUBA8
					TUBB
					TUBB1
					TUBB2A
					TUBB2B
					TUBB2C
					TUBB3
					TUBB4
					TUBB6
					UBA1
					UBA52
					UBE2D1
					UBE2J1
					UFD1L
					UGCGL1
					USF2
					VCP
					VPS25
					XBP1
					YY1
					MARCH2
					MARCH4
					AUP1
					BAG1
					BCAP31
					CALR
					CDC37
					COPS5
					DERL3
					DNAJA2
					DNAJA3
					DNAJB12
					DNAJB2
					DNAJC10
					DNAJC27
					DNAJC3
					DNAJC5
					DNAJC7
					ERLEC1
					ESYT1
					FOXRED2
					HDAC7
					HSPB1
					KIAA0090
					KRT18
					MDM2
					NEDD4L
					NGLY1
					PARK2
					PPID
					PPIL2
					PSMD2
					RNF4
					SAE1
					SELS
					SIAH1
					SQSTM1
					STAM
					STIP1
					STUB1
					PRP19
					SYVN1
					TRIP12
					TSG101
					TTC35
					TXNDC16
					UBAC2
					UBE2D3
					UBE2I
					UBE2N
					UBE3A
					UBE4A
					HACE1
					UBE4B
					UBXN4
					VCPIP1
					GOPC
					ANXA2
					AnxA5
					AQP3
					BECN1
					C20orf7
					CANX
					Cav2
					CCBL1
					CCK
					CCL2
					CRYAB
					DUSP3
					DYDC2
					EDN1
					FAM195A
					GAPDH
					GORASP1
					HSPB8
					HSPBP1
					LGALS3
					Park7
					PFDN2
					PPARG
					PRG2
					PRKCI
					REG3A
					S100A8
					SENP1
					SGK1
					STAT1
					TCEB2
					TCP10L
					TFG
					TRIM31
					TRNAU1AP
					UBXN1
					UCHL1
					usp10
					USP19
					UVRAG
					JAMP
					FAM8A1
					FAF2
					EMC8
					NHERF1

## Sheet: Sheet2
CFTR Proteostasis Network genes
siRNA-based knock-down effects				Overexpression-based effects
Gene	Reference	Gene	Reference	Gene	Reference
NEDD4L	(Caohuy et al. 2009)	PARK2	(Okiyoneda et al. 2010)	USP10	(Bomberger et al. 2009)
AUP1	(Christianson et al. 2012)	PPID	(Okiyoneda et al. 2010)	SGK1	(Caohuy et al. 2009)
DERL3	(Christianson et al. 2012)	PPIL2	(Okiyoneda et al. 2010)	ANXA2	(Trzcinska-Daneluti et al. 2009)
DNAJC10	(Christianson et al. 2012)	SIAH1	(Okiyoneda et al. 2010)	AP2M1	(Trzcinska-Daneluti et al. 2009)
EDEM1	(Christianson et al. 2012)	STAM	(Okiyoneda et al. 2010)	AQP3	(Trzcinska-Daneluti et al. 2009)
ERLEC1	(Christianson et al. 2012)	STIP1	(Okiyoneda et al. 2010)	C20orf7	(Trzcinska-Daneluti et al. 2009)
ESYT1	(Christianson et al. 2012)	STUB1	(Okiyoneda et al. 2010)	Cav2	(Trzcinska-Daneluti et al. 2009)
FOXRED2	(Christianson et al. 2012)	SYVN1	(Okiyoneda et al. 2010)	CCBL1	(Trzcinska-Daneluti et al. 2009)
HERPUD1	(Christianson et al. 2012)	TRIP12	(Okiyoneda et al. 2010)	CCK	(Trzcinska-Daneluti et al. 2009)
KIAA0090	(Christianson et al. 2012)	TSG101	(Okiyoneda et al. 2010)	CCL2	(Trzcinska-Daneluti et al. 2009)
NGLY1	(Christianson et al. 2012)	UBE2D3	(Okiyoneda et al. 2010)	CRYAB	(Trzcinska-Daneluti et al. 2009)
PSMD2	(Christianson et al. 2012)	UBE2N	(Okiyoneda et al. 2010)	DNAJC10	(Trzcinska-Daneluti et al. 2009)
SELS	(Christianson et al. 2012)	UBE3A	(Okiyoneda et al. 2010)	DUSP3	(Trzcinska-Daneluti et al. 2009)
TTC35	(Christianson et al. 2012)	UBE4B	(Okiyoneda et al. 2010)	DYDC2	(Trzcinska-Daneluti et al. 2009)
TXNDC16	(Christianson et al. 2012)	UBE4A	(Okiyoneda et al. 2010)	EDN1	(Trzcinska-Daneluti et al. 2009)
UBAC2	(Christianson et al. 2012)	AHSA1	(Okiyoneda et al. 2010)	FAM195A	(Trzcinska-Daneluti et al. 2009)
UBXN4	(Christianson et al. 2012)	UBE2J1	(Okiyoneda et al. 2010)	GAPDH	(Trzcinska-Daneluti et al. 2009)
VCP	(Christianson et al. 2012)	AMFR	(Okiyoneda et al. 2010)	GORASP1	(Trzcinska-Daneluti et al. 2009)
VCPIP1	(Christianson et al. 2012)	COPS5	(Tanguy et al. 2008)	HSPA4	(Trzcinska-Daneluti et al. 2009)
DERL1	(Christianson et al. 2012)	BCAP31	(Wang et al. 2008),	HSPB8	(Trzcinska-Daneluti et al. 2009)
KRT18	(Davezac et al. 2004)	RNF5	(Younger et al. 2006)	HSPBP1	(Trzcinska-Daneluti et al. 2009)
DNAJB12	(Grove et al. 2011)			LGALS3	(Trzcinska-Daneluti et al. 2009)
CALR	(Harada et al. 2006)			Park7	(Trzcinska-Daneluti et al. 2009)
HDAC7	(Hutt et al. 2010)			PFDN2	(Trzcinska-Daneluti et al. 2009)
ATF6	(Kerbiriou et al. 2007)			PPARG	(Trzcinska-Daneluti et al. 2009)
SQSTM1	(Luciani et al. 2010)			PRG2	(Trzcinska-Daneluti et al. 2009)
BAG1	(Okiyoneda et al. 2010)			PRKCI	(Trzcinska-Daneluti et al. 2009)
CDC37	(Okiyoneda et al. 2010)			REG3A	(Trzcinska-Daneluti et al. 2009)
DNAJA1	(Okiyoneda et al. 2010)			S100A8	(Trzcinska-Daneluti et al. 2009)
DNAJA2	(Okiyoneda et al. 2010)			STAT1	(Trzcinska-Daneluti et al. 2009)
DNAJA3	(Okiyoneda et al. 2010)			TCEB2	(Trzcinska-Daneluti et al. 2009)
DNAJB2	(Okiyoneda et al. 2010)			TCP10L	(Trzcinska-Daneluti et al. 2009)
DNAJC27	(Okiyoneda et al. 2010)			TFG	(Trzcinska-Daneluti et al. 2009)
DNAJC3	(Okiyoneda et al. 2010)			TRIM31	(Trzcinska-Daneluti et al. 2009)
DNAJC5	(Okiyoneda et al. 2010)			TRNAU1AP	(Trzcinska-Daneluti et al. 2009)
DNAJC7	(Okiyoneda et al. 2010)			UBXN1	(Trzcinska-Daneluti et al. 2009)
HGS	(Okiyoneda et al. 2010)			USP19	(Hassink et al. 2009)
Hsp90AA1	(Okiyoneda et al. 2010)			UCHL1	(Henderson et al. 2010)
HSPA8	(Okiyoneda et al. 2010)			AnxA5	(Le Drevo et al. 2008)
37316	(Okiyoneda et al. 2010)			BECN1	(Luciani et al. 2012)
38047	(Okiyoneda et al. 2010)			UVRAG	(Luciani et al. 2012)
MDM2	(Okiyoneda et al. 2010)			CANX	(Norez et al. 2006)
