# Supplementary material for: Unravelling druggable signalling networks that control F508del-CFTR proteostasis
Source: eLife journal article supplement (doi:10.7554/elife.10365), 2015-12-22
Supplement: supp [file elife-10365-supp-v1.zip › elife_poa_e10365_Supplementary_File_5.xlsx]

## Sheet: Sheet1
CORE genes with known roles in proteostasis and regulation
Folding	Degradation	Membrane trafficking	Kinase	Phosphatase
BANK1	ASB8	ATG5	ACPP	PPM1D
BBS12	BACH1	BET1	AKAP1	PPP1CB
C1GALT1C1	BACH2	HOOK1	AKAP8	PPP6C
DNAJA1	BCL6	STX11	AKAP9	PTPN4
DNAJC2	CAND1	TRAK2	ALPK1	PTPRR
FAS	CDC73	BIN2	CAMKK2	PPAP2B
FGFBP1	CUL3	EHD1	CLK1
HSPA4	DTX4	MAL	DCLK1
MITF	ERLIN2	AHI1	ERBB4
PPIE	FBXO7	ARFGAP3	FASTKD1
PPIL6	IBTK	BBS2	GK
RIC3	IVNS1ABP	FNBP1L	INPP5D
SCO2	KBTBD2	GABARAPL2	MAP3K11
	KBTBD3	KIAA1033	MARCKS
	KCND2	LRP1B	NEK1
	KLHL24	MIA3	PDK4
	LMO7	MMP13	PFKFB2
	LNX1	MYO6	PIK3C2G
	LOC220594	PPT1	PIK3C3
	MARCKS	SNX16	PRPF4B
	PATZ1	STON1	STK31
	PPT1	TFRC	STK38L
	RNF215	TUB	TTC33
	SEL1L	YIPF5	ZAP70
	SENP6
	SHPRH
	SPATA18
	TRIM22
	UBE2D1
	UBOX5
	USP25
	VHL
	ZBTB26
	ZBTB38
	ZFAND6
