# Supplementary material for: Unravelling druggable signalling networks that control F508del-CFTR proteostasis
Source: eLife journal article supplement (doi:10.7554/elife.10365), 2015-12-22
Supplement: supp [file elife-10365-supp-v1.zip › elife_poa_e10365_Supplementary_File_6.xlsx]

## Sheet: Sheet1
siRNAs used in the study.
Gene Symbol/Common Name	siRNA ID/ Sense siRNA Sequence (5'-3')/ catalogue no.					Supplier
	siRNA 1	siRNA 2	siRNA 3	siRNA 4	siRNA 5
AKT1	s659	s660	s661			Life Technologies
AKT2	s1215	s1216	s1217			Life Technologies
CALM1	s2340	s2341	s2342			Life Technologies
CALM2	s2343	s2344	s2345			Life Technologies
CALM3	s2346	s2347	s2348			Life Technologies
CALML3	s2349	s2350	s2351			Life Technologies
CENPA	s2906	s2907	s2908			Life Technologies
CENPE	s2917	s2915	s2916			Life Technologies
CSNK2A2	s3639	s3640	s3641			Life Technologies
CSNK2B	s3642	s3643	s3644			Life Technologies
CYC1	s3790	s3791	s3792			Life Technologies
ELAVL1	s4608	s4609	s4610			Life Technologies
ERBB4	s4781	s4782	s4783			Life Technologies
FARSA	s5027	s5028	s5029			Life Technologies
FLNB	s5278	s5279	s5280			Life Technologies
HNF4A	s6696	s6697	s6698			Life Technologies
ONECUT1	s6702	s6703	s6704			Life Technologies
ITPR1	s7631	s7632	s7633			Life Technologies
ITPR2	s7634	s7635	s7636			Life Technologies
ITPR3	s265	s266	s267			Life Technologies
IVL	s7640	s7641	s7642			Life Technologies
KDR/VEGFR2	s7822	s7823	s7824			Life Technologies
KRT34	s8011	s8012	s8013			Life Technologies
LMNB1	s8224	s8225	s8226			Life Technologies
MAL	s8472	s8473	s8474			Life Technologies
MITF	s8790	s8791	s8792			Life Technologies
MKI67	s8796	s8797	s8798			Life Technologies
MAP3K11/MLK3	s8814	s8815	s8814			Life Technologies
NFKB1	s9504	s9505	s9506			Life Technologies
PDE3A	s10183	s10184	s10185			Life Technologies
PDGFRA	s10234	s10235	s10236			Life Technologies
PDGFRB	s10242	s10240	s10241			Life Technologies
PIK3CA	s10520	s10521	s10522			Life Technologies
PIK3CB/PI3K-β	s10524	s10525	s10526			Life Technologies
PIK3CD	s10529	s10530	s10531			Life Technologies
PIK3CG/PI3K-γ	s10532	s10533	s10534			Life Technologies
MED1	s10889	s10890	s10891			Life Technologies
MAPK1	s11137	s11138	s11139			Life Technologies
MAPK3	s11141	s230179	s230180			Life Technologies
MAPK6	s11146	s11147	s11148			Life Technologies
MAPK7	s11149	s11150	s11151			Life Technologies
MAP2K1/MKK1	s11167	s11168	s11169			Life Technologies
MAP2K2/MKK2	s11170	s11171	s11172			Life Technologies
MAP2K3/MKK3	s11173	s11175	s11176			Life Technologies
MAP2K5/MEK5	s11176	s11177	s11178			Life Technologies
MAP2K6/MKK6	s11180	s11181	s11182			Life Technologies
MAP2K7/MKK7	s11182	s11183	s11184			Life Technologies
PXN	s11627	s11628	s11629			Life Technologies
RELB	s11917	s11918	s11919			Life Technologies
S100A7	s12419	s12420	s12421			Life Technologies
MAP2K4/MKK4	s12703	s12701	s12702			Life Technologies
SPRR1A	s13381	s13382	s13383			Life Technologies
SPRR1B	s13383	s13384	s13385			Life Technologies
SPRR3	s13397	s13398	s13399			Life Technologies
TEP1	s13985	s13986	s13987			Life Technologies
TLR4	s14194	s14195	s14196			Life Technologies
TOP3A	s14310	s14311	s14312			Life Technologies
TP53	s605	s606	s607			Life Technologies
VHL	s14789	s14790	s14791			Life Technologies
YWHAH	s14967	s14968	s14961			Life Technologies
ZAP70	s14973	s14974	s14975			Life Technologies
AKAP1	s15665	s15666	s15667			Life Technologies
PPAP2B	s16384	s16385	s16386			Life Technologies
PRPF4B	s17018	s17017	s17018			Life Technologies
NOL3	s300	s301	s302			Life Technologies
SART1	s17343	s17344	s17345			Life Technologies
OSMR	s17542	s17543	s17544			Life Technologies
DCLK1	s17584	s17585	s17586			Life Technologies
WTAP	s18431	s18432	s18433			Life Technologies
DHX38	s18906	s18907	s18908			Life Technologies
MED13	s19365	s19366	s19367			Life Technologies
FGFBP1	s19392	s19393	s19394			Life Technologies
SCO2	s19424	s19425	s19426			Life Technologies
AKT3	s19427	s19428	s19429			Life Technologies
TROAP	s229661	s229662	s229663			Life Technologies
KIF20A	s19676	s19677	s19678			Life Technologies
RBM7	s19835	s19836	s19837			Life Technologies
AKAP8	s20070	s20068	s20069			Life Technologies
RGS19	s20107	s20108	s20109			Life Technologies
CD2BP2	s20381	s20382	s20383			Life Technologies
PRPF8	s20796	s20797	s20798			Life Technologies
CAMKK2	s20925	s20926	s20927			Life Technologies
STAG2	s21089	s21090	s21091			Life Technologies
NUP50	s21138	s21139	s21140			Life Technologies
EHD1	s21513	s21514	s21515			Life Technologies
WDR6	s22068	s22069	s22070			Life Technologies
UBOX5	s22595	s22596	s22597			Life Technologies
ZC3H3	s23133	s23134	s23135			Life Technologies
DICER1	s23754	s23755	s23756			Life Technologies
PATZ1	s24176	s24177	s24178			Life Technologies
FBXO7	s24491	s24492	s24493			Life Technologies
SENP6	s25023	s25024	s25025			Life Technologies
DNAJC2	s25685	s25686	s25687			Life Technologies
GEMIN4	s27064	s27065	s27066			Life Technologies
PDE11A	s27187	s27188	s27189			Life Technologies
BIN2	s28102	s28103	s28104			Life Technologies
GTSE1	s28240	s28241	s28242			Life Technologies
CALML5	s28669	s195236	s195237			Life Technologies
SHC3	s28721	s28722	s28723			Life Technologies
CYCS	s28896	s28897	s28898			Life Technologies
DGCR8	s29061	s29062	s29063			Life Technologies
EXOSC4	s29112	s29113	s29114			Life Technologies
C14orf106	s30720	s30721	s30722			Life Technologies
CTDSP1	s33804	s33805	s33806			Life Technologies
DSN1	s36760	s36761	s36762			Life Technologies
ALPK1	s37074	s37072	s37073			Life Technologies
ASB8	s44282	s44283	s44284			Life Technologies
CALML6	s46468	s46469	s46470			Life Technologies
CSNK2A1/CKII	s3636	s3637	s3638			Life Technologies
MAPK15	s48270	s48271	s48272			Life Technologies
NFKB2	s9507	s9508	s9509			Life Technologies
PROKR1	s21384	s21385	s21386			Life Technologies
PROKR2	s43338	s43339	s43340			Life Technologies
RELA	s11914	s11915	s11916			Life Technologies
RNF215	s47218	s47217	s47218			Life Technologies
FLT1/VEGFR1	s5287	s5288	s5289			Life Technologies
FLT4/VEGFR3	s5294	s5295	s5296			Life Technologies
Non targeting -CHGG_05424	CCGCACUCCUGAACUUGAAtt	GCACCGUCCUAAUCGUCGAtt	GCUGGGUGGCGGAUAAGUAtt			Life Technologies
Non targeting -CHGG_05426	CAGUCGAAGAAGAUGGUUAtt	CGAGUCCGUGGAUAUCGUUtt	ACCGCACUCCUGAACUUGAtt			Life Technologies
MAPK8/JNK1	GUGGAAAGAAUUGAUAUAUAA					Sigma-Aldrich (USA)
MAPK9/JNK2	AAGAGAGCUUAUCGUGAACUU					Sigma-Aldrich (USA)
MAPK10/JNK3	CCGCAUGUGUCUGUAUUCAUA					Sigma-Aldrich (USA)
MAPK11/p38-β	CAGGAUGGAGCUGAUCCAGUA					Sigma-Aldrich (USA)
MAPK12/p38-γ	CUGGACGUAUUCACUCCUGAU					Sigma-Aldrich (USA)
MAPK13/p38-δ	CCGGAGUGGCAUGAAGCUGUA					Sigma-Aldrich (USA)
MAPK14/p38-α	AACUGCGGUUACUUAAACAUA					Sigma-Aldrich (USA)
MAP2K7/MKK7	AGACUGCCUUACUAAAGAU					Sigma-Aldrich (USA)
CAMK1	CAGGUGCUGGAUGCUGUGAAA					Sigma-Aldrich (USA)
PRKAA1(AMPK)	CCCACGAUAUUCUGUACACAA					Sigma-Aldrich (USA)
PRKAA2(AMPK)	CCGAAGUCAGAGCAAACCGUA					Sigma-Aldrich (USA)
RNF5/RMA1	GCGCGACCUUCGAAUGUAA	CGGCAAGAGUGUCCAGUAU				Sigma-Aldrich (USA)
CAMKK2	GGAUCUGAUCAAAGGCAUC˚	GCAUCGAGUACUUACACUA				Sigma-Aldrich (USA)
MAP3K11/MLK3	GCAGCGACGUGUCGAGCUU*˚	GCAGUGACGUCUGGAGUUU	GGGCAGUGACGUCUGGAGUUU	CUGGAGGACUCAAGCAAUG	GGAGGAGUCACAGCAUACATT	Sigma-Aldrich (USA)
AHSA1/AHA1	AUUGGUCCACGGAUAAGCU					Sigma-Aldrich (USA)
RAC1	UUUACCUACAGCUCCGUCUUU					Sigma-Aldrich (USA)
RAC2	AACUACUCAGCCAAUGUGAUG					Sigma-Aldrich (USA)
RAC3	CGCGCCCAUGCAGGCCAUCAA					Sigma-Aldrich (USA)
GSK3B	GUAAUCCACCUCUGGCUAC					Sigma-Aldrich (USA)
MAP4K1/HPK1	CUGACUAAGAGUCCCAAGA					Sigma-Aldrich (USA)
BRAF	AAGUGGCAUGGUGAUGUGGCA					Sigma-Aldrich (USA)
TGFBR1/TGFR-1	GCCUUAUUAUGAUCUUGUA	GCAAUGGGCUUAGUAUUCU				Sigma-Aldrich (USA)
TGFBR2/TGFR-2	GGAGAAAGAAUGACGAGAA	CCAGCAAUCCUGACUUGUU				Sigma-Aldrich (USA)
TGFBR3/TGFR-3	GACAAUGACCAAAUCAAUA	5GGAGUCAGGUGAUAAUGGA				Sigma-Aldrich (USA)
TNFRSF1A/TNFR1	CGGUGACUGUCCCAACUUU	GAACCUACUUGUACAAUGA				Sigma-Aldrich (USA)
TNFRSF1B/TNFR2	AGAAUACUAUGACCAGACA	GCCUUGGGUCUACUAAUAA				Sigma-Aldrich (USA)
MAP4K2/GCK	SASI_Hs01_00059138					Sigma-Aldrich (USA)
CDC42	SASI_Hs01_00113094					Sigma-Aldrich (USA)
CSNK2A1/CKII	SASI_Hs01_00110178˚	SASI_Hs01_00110179				Sigma-Aldrich (USA)
NUP50	SASI_Hs01_00193418˚	SASI_Hs01_00193419				Sigma-Aldrich (USA)
siControl-1 ( AllStars Negative Control siRNA)	SI03650318					Qiagen (Germany)
siControl -2	UAGCGACUAAACACAUCAA					Sigma-Aldrich (USA)
* indicates the siRNA for MLK3 that was used for all the experiments except for the original screening study (Figure 2A-D). Of note, all the different siRNAs to MLK3 mentioned here led to qualitatively similar rescue of F508del-CFTR.
˚ indicates the siRNA used for epistatic interactions (Figure 2G).
