# Supplementary figures and images for: Unravelling druggable signalling networks that control F508del-CFTR proteostasis
Source: eLife journal article supplement (doi:10.7554/elife.10365), 2015-12-22

Figure 2-Figure Supplement 1

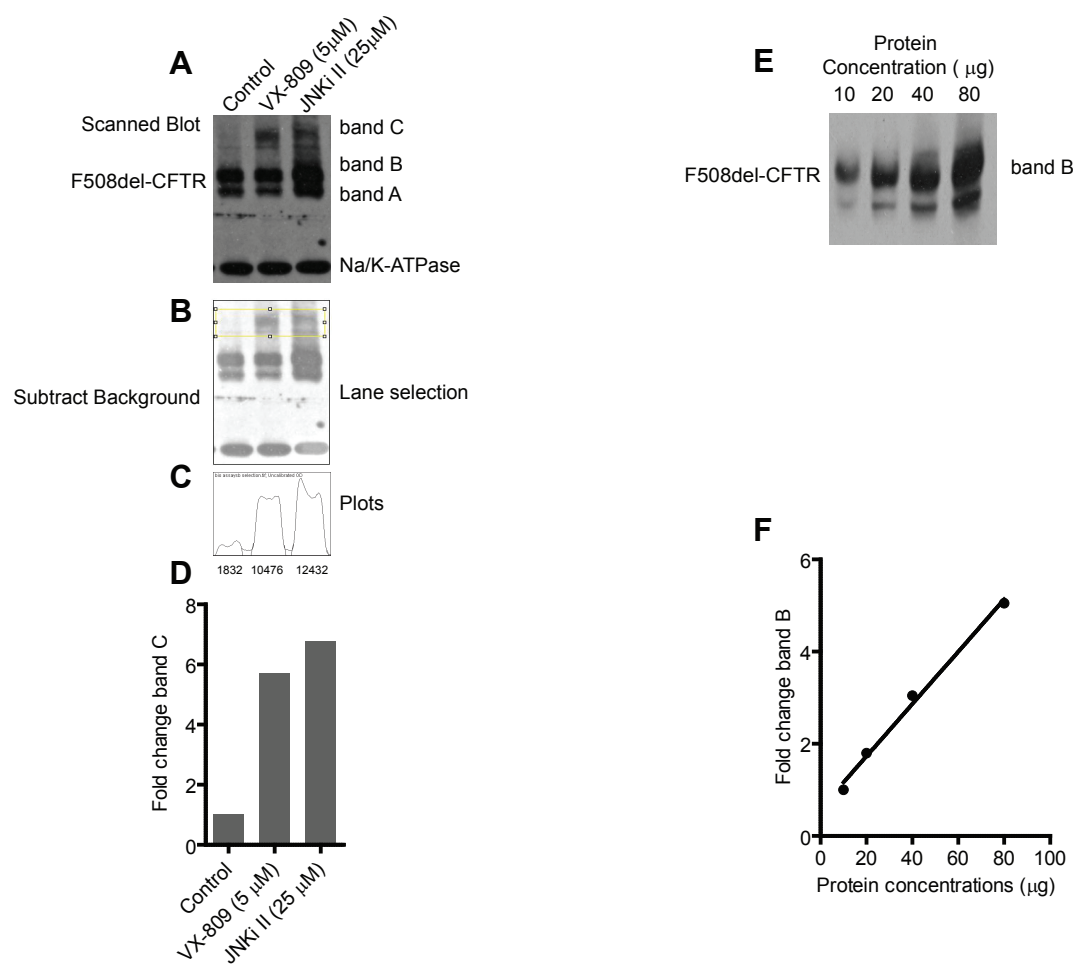

Supplement: supp [file elife-10365-supp-v1.zip]

**Figure 1-Figure Supplement 1**

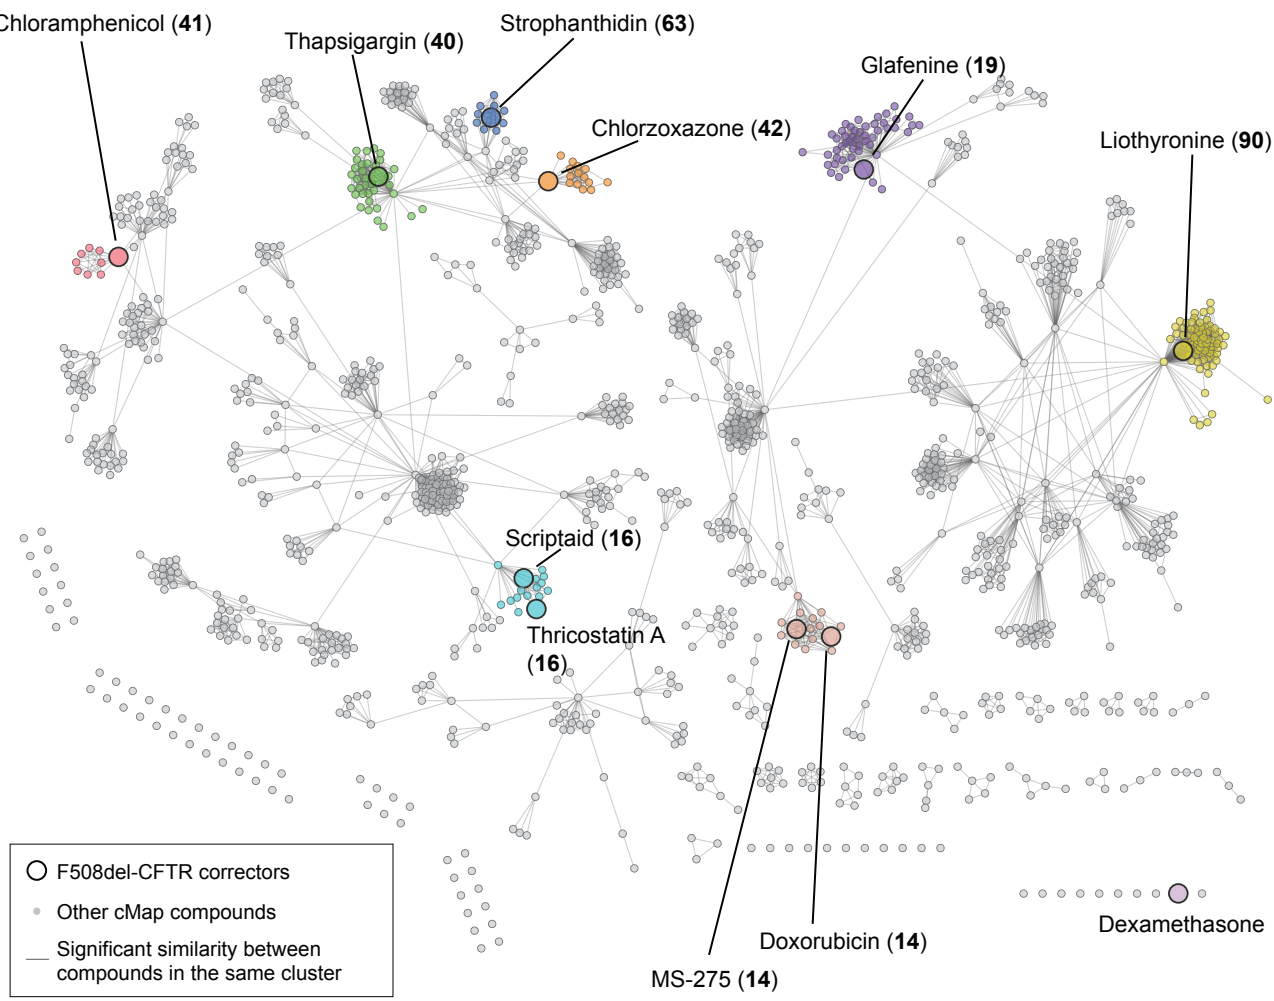

Supplement: supp [file elife-10365-supp-v1.zip]

Figure 3-Figure Supplement 1

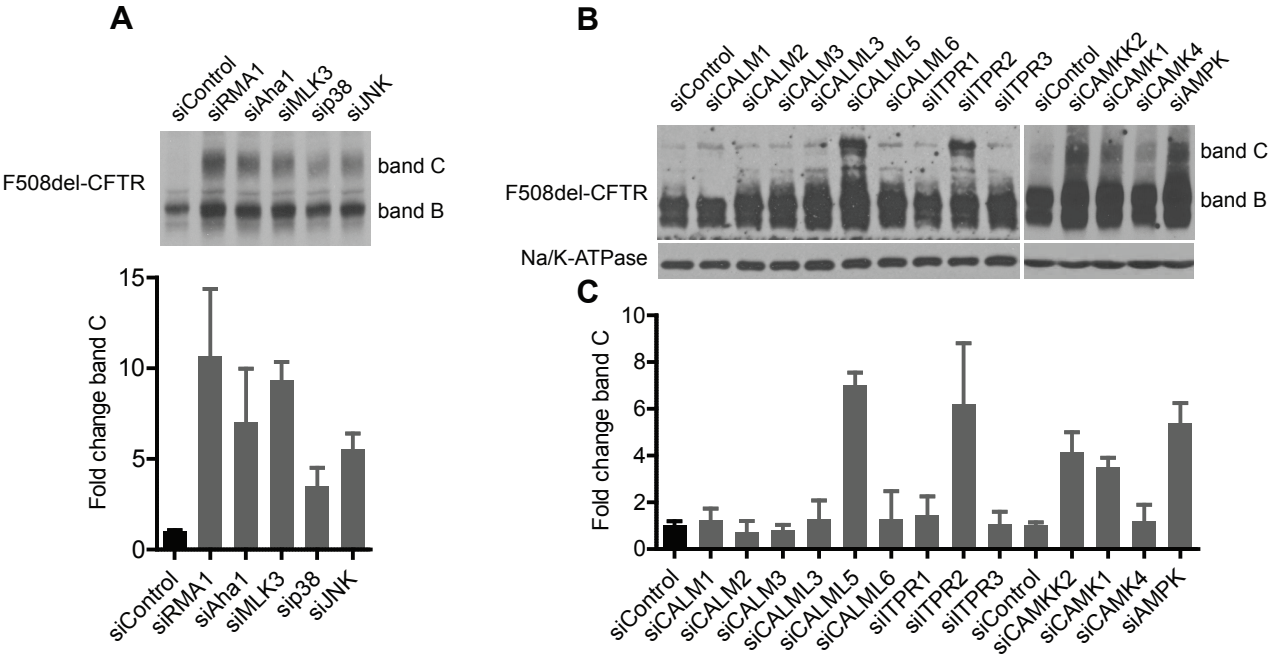

Supplement: supp [file elife-10365-supp-v1.zip]

Figure 6-Figure Supplement 1

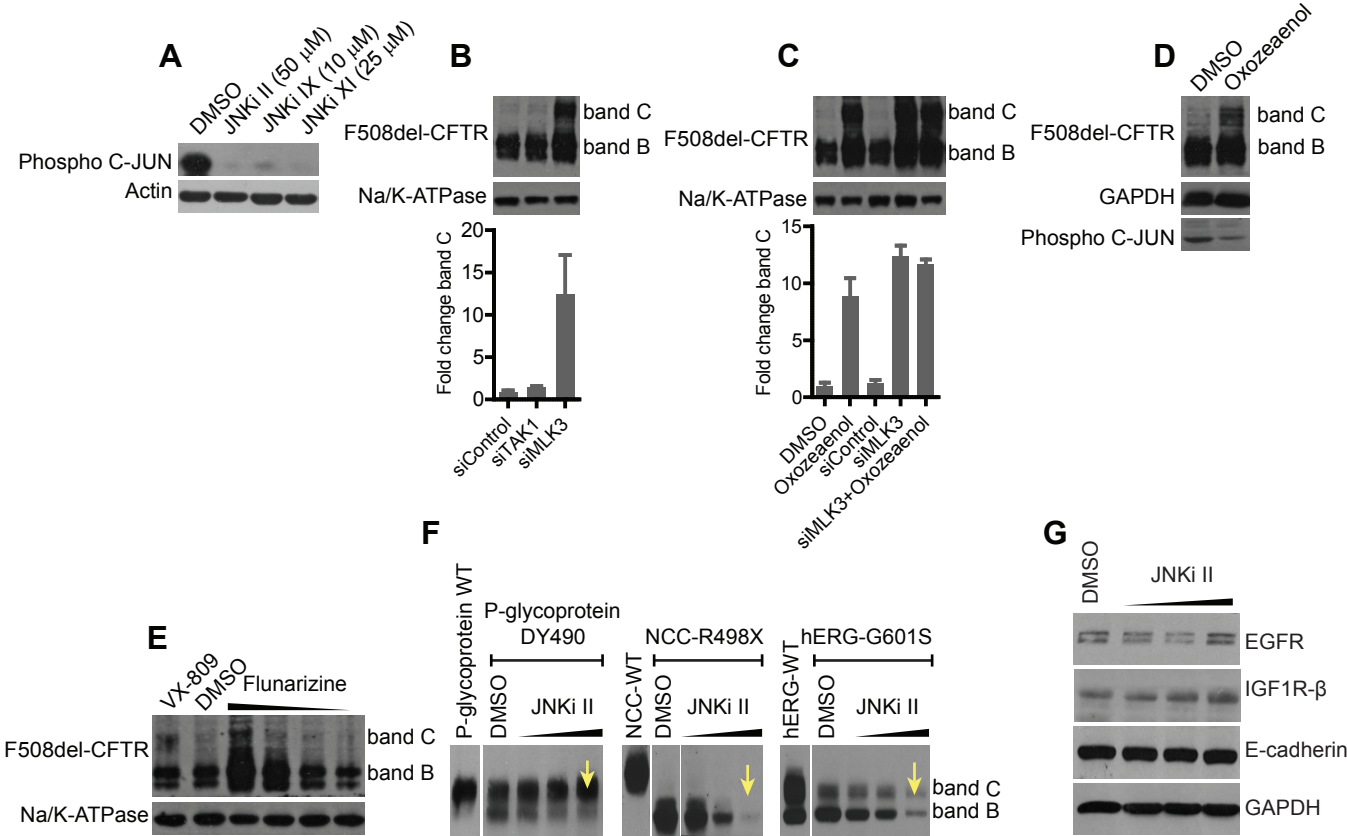

Supplement: supp [file elife-10365-supp-v1.zip]

Figure 1-Figure Supplement 2

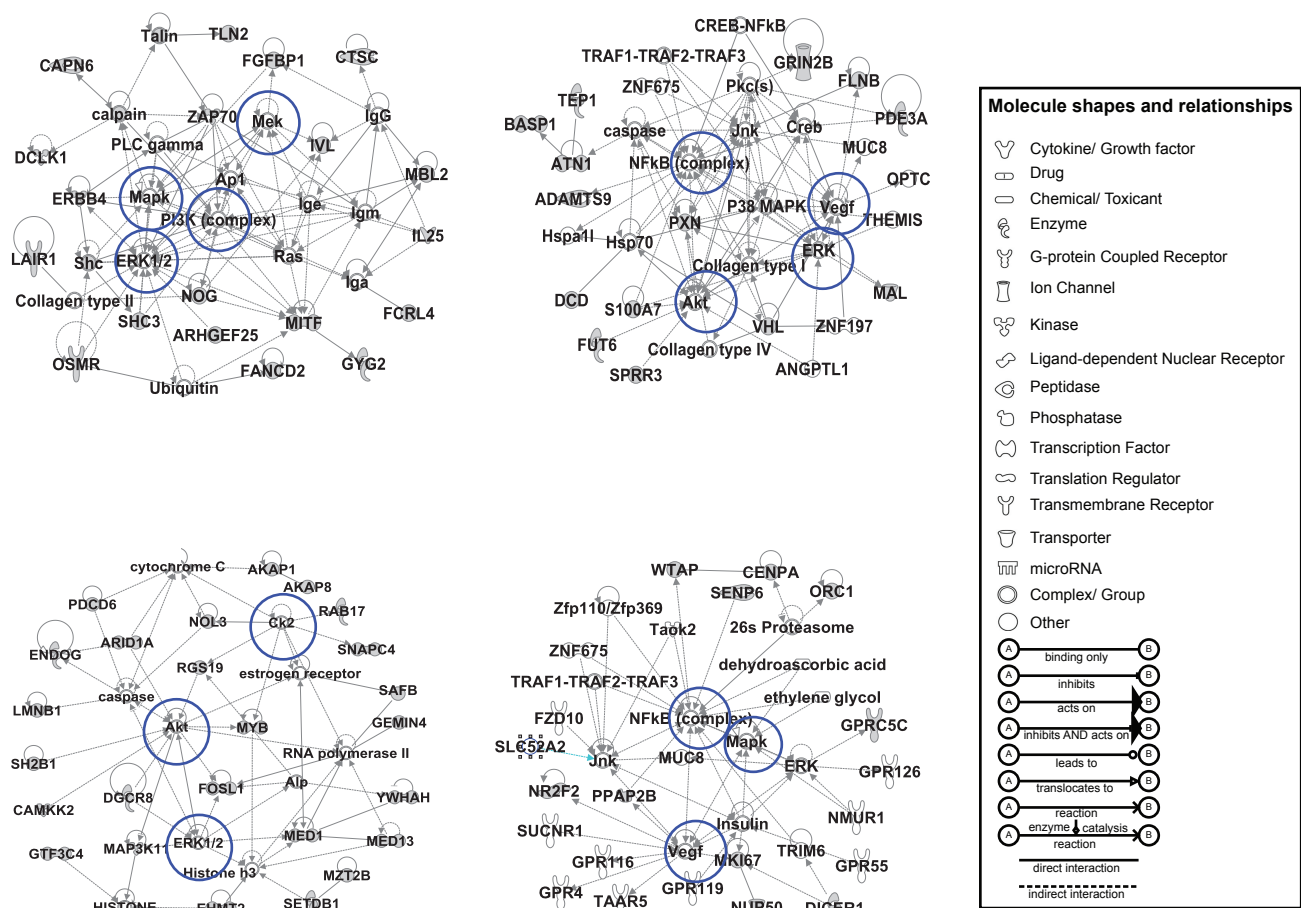

Supplement: supp [file elife-10365-supp-v1.zip]

Figure 2-Figure Supplement 2

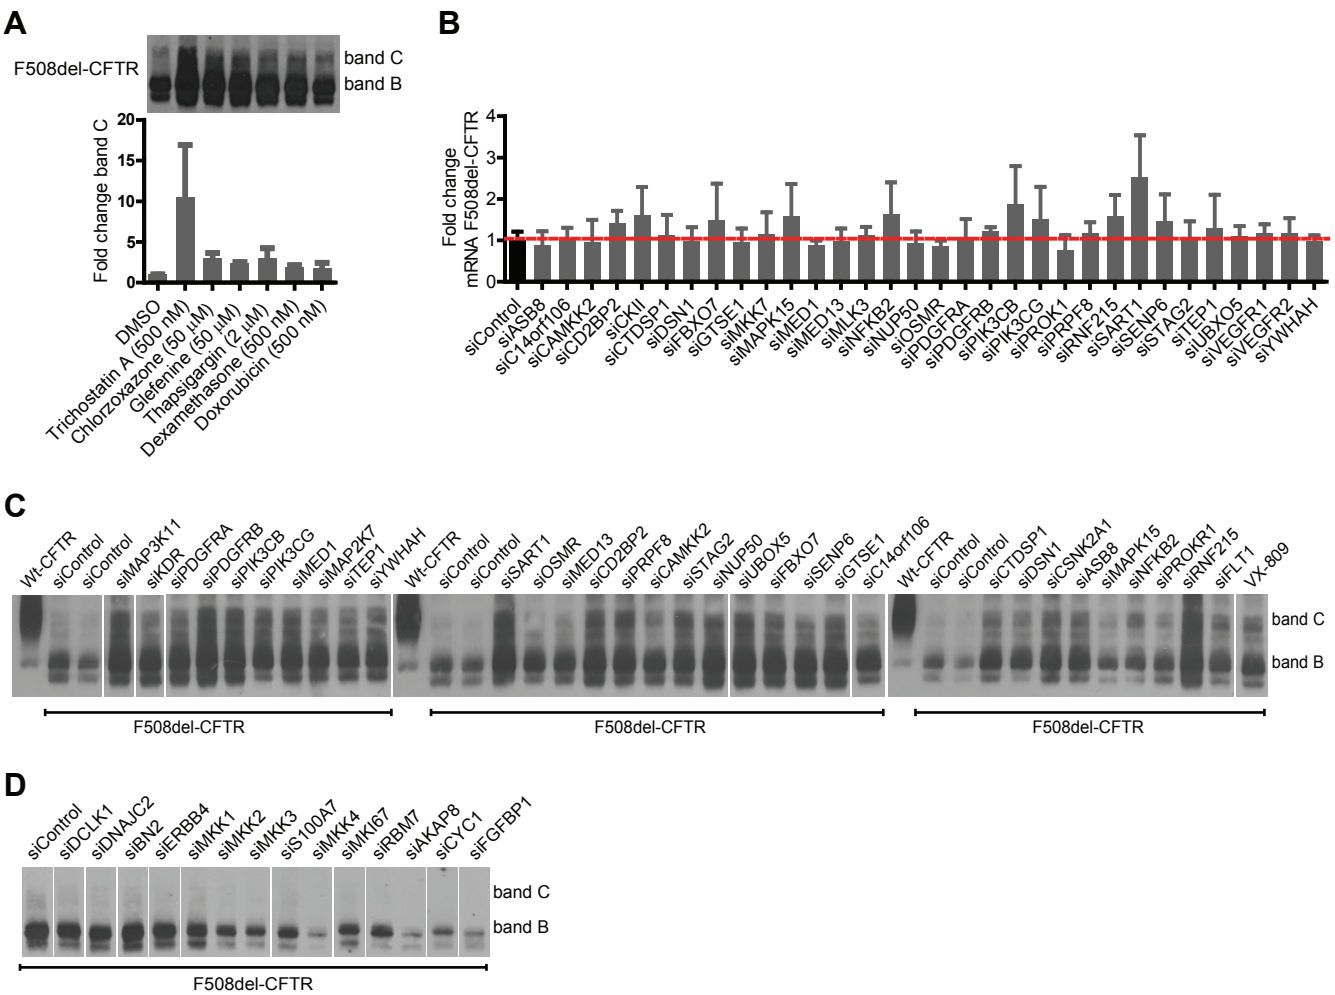

Supplement: supp [file elife-10365-supp-v1.zip › elife_poa_e10365_Figure_2_figure_supplement_2.pdf]

Figure 4-Figure Supplement 1

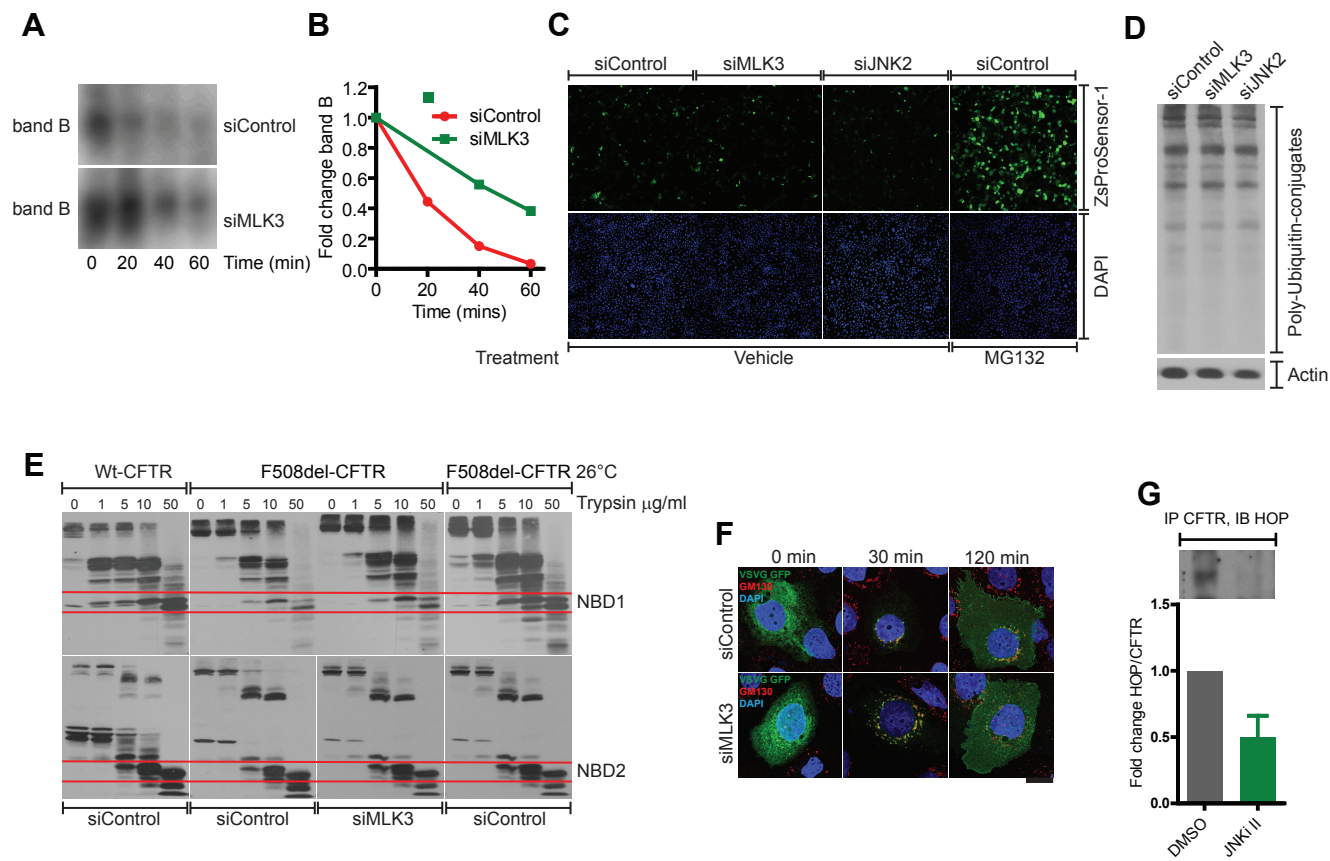

Supplement: supp [file elife-10365-supp-v1.zip › elife_poa_e10365_Figure_4_figure_supplement_1.pdf]

Figure 2-Figure Supplement 3

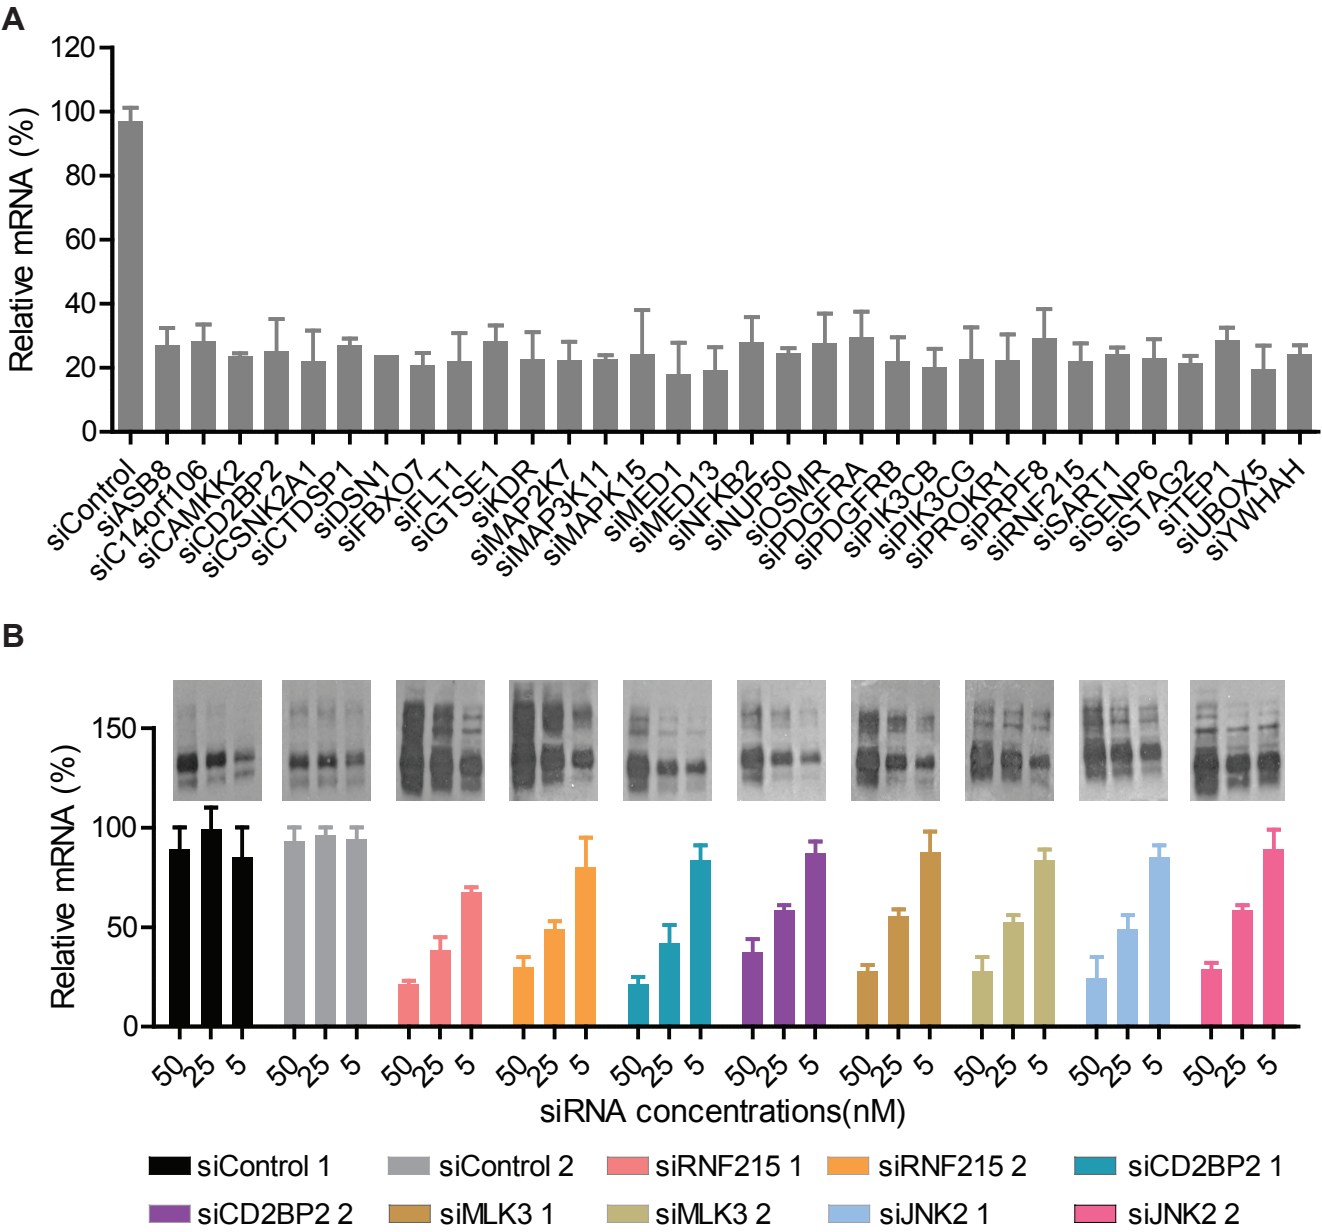

Supplement: supp [file elife-10365-supp-v1.zip › elife_poa_e10365_Figure_2_figure_supplement_3.pdf]

Figure 6-Figure Supplement 2

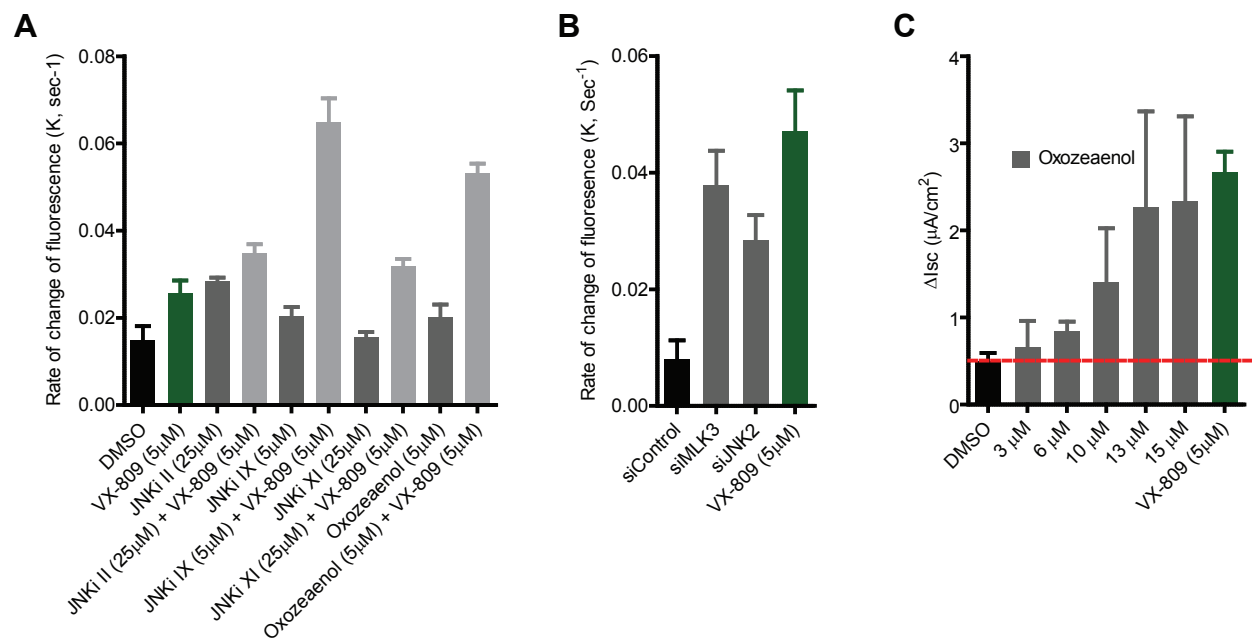

Supplement: supp [file elife-10365-supp-v1.zip › elife_poa_e10365_Figure_6_figure_supplement_2.pdf]
